# Supplementary material
Source: Research Square preprint supplement (doi:10.21203/rs.3.rs-8961109/v1)
Supplement: Supplementary file 1 [file 240a3a96e22ad51acc67b039.xlsx]

## Sheet: TableS1 GenesChr2H QTLregion  
Supplementary Table S1: List of candidates susceptibility genes identified in the QTL region at barley Chr2HS upon inoculation of the P. teres f. maculata isolate ID220 on the RIL barley population TR 326 x PI 67381. Gene ID is based on he annotation of the H. vulgare MorexV3 genome.
Sequence-region Chr2HS 1.2Mb (position 14102571-15320802)
Chromosome	Position Start (bp)	Position End (bp)	Gene ID	Description	PFAM	INTERPRO SCAN
2HS	14605220	14610795	HORVU.MOREX.r3.2HG0102090.1	Terpene synthase	PF03936,PF01397	IPR008930,IPR008949,IPR005630,IPR001906
2HS	14618620	14618925	HORVU.MOREX.r3.2HG0102100.1	LINE-1 reverse transcriptase like	PF00078	IPR000477
2HS	14652618	14656801	HORVU.MOREX.r3.2HG0102130.1	Nitrate transporter 1.2	PF00854	IPR000109,IPR020846
2HS	14671643	14673307	HORVU.MOREX.r3.2HG0102140.1	O-methyltransferase family protein,expressed	PF00891,PF08100	IPR001077,IPR012967,IPR011991,IPR029063
2HS	14681874	14687392	HORVU.MOREX.r3.2HG0102150.1	ABC transporter G family member	PF00005	IPR003439,IPR027417
2HS	14813291	14813599	HORVU.MOREX.r3.2HG0102200.1	nitrile specifier protein 2	NA	NA
2HS	14839784	14839993	HORVU.MOREX.r3.2HG0102220.1	Glutamyl-tRNA(Gln) amidotransferase subunit A	NA	NA
2HS	14840068	14840553	HORVU.MOREX.r3.2HG0102230.1	plant glycogenin-like starch initiation protein 3	NA	NA
2HS	14843521	14843961	HORVU.MOREX.r3.2HG0102260.1	RNA-directed DNA polymerase (reverse transcriptase)-related family protein	PF13966	IPR026960
2HS	14854697	14855095	HORVU.MOREX.r3.2HG0102280.1	Ethylene-responsive transcription factor 1	NA	NA
2HS	14897010	14897495	HORVU.MOREX.r3.2HG0102330.1	plant glycogenin-like starch initiation protein 3	NA	NA
2HS	14963006	14963410	HORVU.MOREX.r3.2HG0102460.1	Magnesium transporter MRS2-4	NA	NA
2HS	14989783	14990605	HORVU.MOREX.r3.2HG0102490.1	Transcription factor,putative	PF03634	IPR005333
2HS	14994332	14998791	HORVU.MOREX.r3.2HG0102500.1	60 kDa chaperonin	PF00118	IPR001844,IPR027409,IPR002423
2HS	15003762	15006342	HORVU.MOREX.r3.2HG0102510.1	Serine/threonine-protein phosphatase 7 long form-like protein	PF10536	IPR019557
2HS	15012345	15014779	HORVU.MOREX.r3.2HG0102520.1	BED zinc finger,hAT family dimerization domain	PF05699,PF14372	IPR012337,IPR008906,IPR025525
2HS	15029046	15044335	HORVU.MOREX.r3.2HG0102530.1	Disease resistance protein (NBS-LRR class) family	PF00931	IPR027417,IPR002182
2HS	15154548	15155196	HORVU.MOREX.r3.2HG0102540.1	La-related protein 7	NA	NA
2HS	15156736	15158753	HORVU.MOREX.r3.2HG0102550.1	Acidic leucine-rich nuclear phosphoprotein 32 family B protein	NA	NA
2HS	15181352	15182474	HORVU.MOREX.r3.2HG0102560.1	Sulfotransferase	PF00685	IPR027417,IPR000863
2HS	15188385	15189386	HORVU.MOREX.r3.2HG0102570.1	Dirigent protein	PF03018	IPR004265
2HS	15224987	15225448	HORVU.MOREX.r3.2HG0102590.1	F-box domain containing protein,expressed	NA	NA
2HS	15250621	15254952	HORVU.MOREX.r3.2HG0102600.1	Peptidylprolyl isomerase	PF13181,PF00254	IPR019734,IPR011990,IPR001179
2HS	15311053	15316684	HORVU.MOREX.r3.2HG0102660.1	Serine/threonine-protein kinase	PF08276,PF07714,PF01453,PF00954	IPR003609,IPR001245,IPR011009,IPR001480,IPR000858

## Sheet: TableS2 GenesChr4HS QTLregion
Supplementary Table S2: List of candidates susceptibility genes identified in the QTL region at barley Chr4HS upon inoculation of the P. teres f. maculata isolate ID220 on the RIL barley population PI 392501 x PI 67381. Gene ID is based on he annotation of the H. vulgare MorexV3 genome.
Sequence-region Chr4HS 46.4Mb (position 449611912-496024941)
Chromosome	Position Start (bp)	Position End (bp)	Gene ID	Description	PFAM	INTERPRO SCAN
4HS	449610319	449613424	HORVU.MOREX.r3.4HG0384590.1	Chaperone protein DnaJ	PF00226	IPR012336,IPR001623
4HS	449840462	449843487	HORVU.MOREX.r3.4HG0384600.1	Ran-binding protein 1	PF00638	IPR011993,IPR000156
4HS	449848778	449850300	HORVU.MOREX.r3.4HG0384620.1	Kinase family protein	PF00069	IPR000719,IPR011009
4HS	449853503	449855550	HORVU.MOREX.r3.4HG0384630.1	Glutathione S-transferase T3	PF14303	IPR029466
4HS	449866677	449870012	HORVU.MOREX.r3.4HG0384640.1	Mitochondrial carrier protein,expressed	PF00153	IPR018108,IPR023395
4HS	450225876	450232966	HORVU.MOREX.r3.4HG0384690.1	Vacuolar-sorting-associated protein 37-like protein	PF07200	IPR009851
4HS	450235433	450237352	HORVU.MOREX.r3.4HG0384700.1	Protein phosphatase 2C family protein	PF00481	IPR001932
4HS	450242053	450242406	HORVU.MOREX.r3.4HG0384710.1	Potassium channel AKT6	NA	NA
4HS	450367247	450367750	HORVU.MOREX.r3.4HG0384720.1	Eukaryotic translation initiation factor 2 subunit 3	NA	NA
4HS	450540032	450540643	HORVU.MOREX.r3.4HG0384760.1	Disease resistance protein (TIR-NBS-LRR class) family	NA	NA
4HS	450754353	450757811	HORVU.MOREX.r3.4HG0384780.1	Trichome birefringence-like protein	PF14416,PF13839	IPR025846,IPR026057
4HS	450877565	450881355	HORVU.MOREX.r3.4HG0384790.1	Asparagine synthetase	PF13537,PF00733	IPR017932,IPR006426,IPR001962,IPR029055
4HS	450972796	450974285	HORVU.MOREX.r3.4HG0384800.1	E3 ubiquitin-protein ligase	PF03145	IPR008974,IPR018121
4HS	451328350	451336130	HORVU.MOREX.r3.4HG0384820.1	RING/FYVE/PHD zinc finger protein	PF16135,PF00628,PF05641	IPR032308,IPR016181,IPR019787,IPR008395,IPR011011
4HS	451363045	451363263	HORVU.MOREX.r3.4HG0384830.1	Ribose-5-phosphate isomerase A	NA	NA
4HS	451363819	451364040	HORVU.MOREX.r3.4HG0384840.1	RNA-binding (RRM/RBD/RNP motifs) family protein	NA	NA
4HS	451364166	451364807	HORVU.MOREX.r3.4HG0384850.1	ATP-dependent Clp protease ATP-binding subunit ClpX	PF05970	IPR027417,IPR010285
4HS	451398776	451399232	HORVU.MOREX.r3.4HG0384910.1	Membrane insertion protein,OxaA/YidC with tetratricopeptide repeat domain-containing protein	NA	NA
4HS	451503545	451523662	HORVU.MOREX.r3.4HG0384950.1	Phosphoinositide phosphatase family protein	PF02383	IPR002013
4HS	451876788	451880006	HORVU.MOREX.r3.4HG0384980.1	Omega-3 fatty acid desaturase	PF00487,PF11960	IPR005804,IPR021863
4HS	452345032	452345288	HORVU.MOREX.r3.4HG0385000.1	Enoyl-CoA hydratase 2,peroxisomal	NA	NA
4HS	452697824	452702066	HORVU.MOREX.r3.4HG0385030.1	2-oxoglutarate (2OG) and Fe(II)-dependent oxygenase superfamily protein	PF14226,PF03171	IPR026992,IPR005123
4HS	453029583	453030718	HORVU.MOREX.r3.4HG0385040.1	Rhodanese-like family protein-like protein	PF00581	IPR001763
4HS	453031020	453034422	HORVU.MOREX.r3.4HG0385050.1	Phosphoinositide phospholipase C	PF00387,PF00168,PF00388	IPR011992,IPR001711,IPR000008,IPR017946
4HS	453071697	453072189	HORVU.MOREX.r3.4HG0385060.1	vacuolar protein sorting-associated protein,putative (DUF1162)	NA	NA
4HS	453073204	453075930	HORVU.MOREX.r3.4HG0385070.1	cytokinin oxidase/dehydrogenase 1	NA	NA
4HS	453215474	453218862	HORVU.MOREX.r3.4HG0385080.1	RING/U-box superfamily protein	PF12274	IPR022059
4HS	453482755	453486396	HORVU.MOREX.r3.4HG0385100.1	Protein YIPF	PF04893	IPR006977
4HS	453580908	453587253	HORVU.MOREX.r3.4HG0385110.1	Non-specific serine/threonine protein kinase	PF02149,PF00627,PF00069	IPR001772,IPR028375,IPR011009,IPR015940,IPR000719
4HS	453643756	453644079	HORVU.MOREX.r3.4HG0385130.1	ERD (early-responsive to dehydration stress) family protein	NA	NA
4HS	453944381	453947178	HORVU.MOREX.r3.4HG0385140.1	Carbamoyl-phosphate synthase large chain	NA	NA
4HS	454087861	454091780	HORVU.MOREX.r3.4HG0385160.1	Transmembrane protein 209	PF09786	IPR019176
4HS	454318887	454322495	HORVU.MOREX.r3.4HG0385170.1	Lipid phosphate phosphatase	PF01569	IPR000326
4HS	454322245	454322604	HORVU.MOREX.r3.4HG0385180.1	4-diphosphocytidyl-2-C-methyl-D-erythritol kinase	NA	NA
4HS	454323302	454325163	HORVU.MOREX.r3.4HG0385190.1	Alpha-taxilin,putative,expressed	PF09728	IPR026183
4HS	454329314	454333719	HORVU.MOREX.r3.4HG0385210.1	Pseudouridine synthase	PF00849	IPR020103,IPR006145
4HS	454333917	454337196	HORVU.MOREX.r3.4HG0385220.1	Cytochrome C oxidase assembly protein COX16	PF14138	IPR020164
4HS	454363672	454363974	HORVU.MOREX.r3.4HG0385230.1	Protein FAR1-RELATED SEQUENCE 6	NA	NA
4HS	454367484	454372393	HORVU.MOREX.r3.4HG0385240.1	Alpha/beta-Hydrolases superfamily protein	PF12697	IPR029058,IPR000073
4HS	454633650	454633979	HORVU.MOREX.r3.4HG0385250.1	Integrin-linked protein kinase family	NA	NA
4HS	454640306	454642555	HORVU.MOREX.r3.4HG0385260.1	Thioredoxin/protein disulfide isomerase	PF00085	IPR012336,IPR013766
4HS	454646674	454648249	HORVU.MOREX.r3.4HG0385280.1	Glutathione S-transferase T3	NA	NA
4HS	454882529	454883044	HORVU.MOREX.r3.4HG0385290.1	Plant regulator RWP-RK family protein	NA	NA
4HS	455087882	455090747	HORVU.MOREX.r3.4HG0385300.1	Elongation factor 1-alpha	PF03143,PF03144	IPR004160,IPR009000,IPR004539,IPR004161,IPR009001,IPR027417
4HS	455187265	455190271	HORVU.MOREX.r3.4HG0385320.1	Pyruvate decarboxylase	NA	NA
4HS	455211657	455215550	HORVU.MOREX.r3.4HG0385330.1	Glycosyltransferases	PF03360	IPR029044,IPR005027
4HS	455533272	455533532	HORVU.MOREX.r3.4HG0385350.1	UDP-3-O-acylglucosamine N-acyltransferase	NA	NA
4HS	455612175	455612810	HORVU.MOREX.r3.4HG0385380.1	intracellular protein transporter USO1-like protein	NA	NA
4HS	455859298	455860725	HORVU.MOREX.r3.4HG0385420.1	Werner Syndrome-like exonuclease	PF01612	IPR002562,IPR012337
4HS	455870238	455871003	HORVU.MOREX.r3.4HG0385430.1	LOB domain-containing protein,putative	PF03195	IPR004883
4HS	455885415	455885957	HORVU.MOREX.r3.4HG0385440.1	RNA helicase,ATP-dependent,SK12/DOB1 protein	NA	NA
4HS	455913919	455914233	HORVU.MOREX.r3.4HG0385470.1	Serine hydroxymethyltransferase 3	NA	NA
4HS	456056744	456057211	HORVU.MOREX.r3.4HG0385480.1	Receptor-like protein kinase	NA	NA
4HS	456119361	456119621	HORVU.MOREX.r3.4HG0385500.1	Gamma-glutamyl phosphate reductase	NA	NA
4HS	456171095	456173453	HORVU.MOREX.r3.4HG0385530.1	Phosphatidylinositol transfer protein,expressed	PF02121	IPR001666
4HS	456313999	456320632	HORVU.MOREX.r3.4HG0385560.1	Arabinolytic transcriptional activator araR	NA	NA
4HS	456326127	456326447	HORVU.MOREX.r3.4HG0385620.1	Zf-RanBP domain-containing protein	NA	NA
4HS	456326816	456327163	HORVU.MOREX.r3.4HG0385630.1	Receptor-like protein kinase 2.33	NA	NA
4HS	456563518	456563974	HORVU.MOREX.r3.4HG0385650.1	Very-long-chain (3R)-3-hydroxyacyl-CoA dehydratase	PF04387	IPR007482
4HS	456819709	456822968	HORVU.MOREX.r3.4HG0385670.1	DDB1-and CUL4-associated factor	PF00400,PF00400	IPR017986,IPR001680
4HS	457509204	457511587	HORVU.MOREX.r3.4HG0385680.1	RNA-binding protein	PF00076	IPR012677,IPR000504
4HS	457512385	457516008	HORVU.MOREX.r3.4HG0385690.1	Triose-phosphate transporter family protein	PF03151	IPR004853
4HS	457698644	457699549	HORVU.MOREX.r3.4HG0385720.1	ArfGap/RecO-like zinc finger domain-containing protein	NA	NA
4HS	457954356	457957725	HORVU.MOREX.r3.4HG0385730.1	Arogenate dehydratase	PF00800	IPR001086
4HS	457963923	457965380	HORVU.MOREX.r3.4HG0385760.1	Serine/threonine-protein phosphatase 7 long form-like protein	PF10536	IPR019557
4HS	458285465	458285692	HORVU.MOREX.r3.4HG0385770.1	Protein translocase subunit SecA	NA	NA
4HS	458285872	458288174	HORVU.MOREX.r3.4HG0385780.1	Mitogen-activated protein kinase	PF00069	IPR011009,IPR000719
4HS	458346156	458349159	HORVU.MOREX.r3.4HG0385790.1	Ascorbate peroxidase	PF00141	IPR002016,IPR010255
4HS	458387756	458388520	HORVU.MOREX.r3.4HG0385800.1	Vascular plant one zinc finger transcription factor protein	NA	NA
4HS	458388582	458388985	HORVU.MOREX.r3.4HG0385810.1	Pleckstrin homology (PH) domain-containing protein	NA	NA
4HS	458671571	458674457	HORVU.MOREX.r3.4HG0385870.1	2,3-bisphosphoglycerate-independent phosphoglycerate mutase	NA	NA
4HS	459040002	459053692	HORVU.MOREX.r3.4HG0385880.1	Pentatricopeptide repeat-containing protein	PF17177,PF13812	IPR033443,IPR002885
4HS	459054286	459056272	HORVU.MOREX.r3.4HG0385890.1	DNA topoisomerase 6 subunit A	PF04406	IPR013049,IPR002815
4HS	459179927	459182977	HORVU.MOREX.r3.4HG0385910.1	Thioredoxin-like protein AAED1,chloroplastic	PF13911	IPR032801,IPR012336
4HS	459183108	459189863	HORVU.MOREX.r3.4HG0385920.1	Hydrolase family protein / HAD-superfamily protein	PF13344	IPR006357,IPR006353,IPR006357,IPR023214
4HS	459717105	459722719	HORVU.MOREX.r3.4HG0385940.1	Pseudo-response regulator	PF00072,PF06203	IPR001789,IPR011006,IPR010402
4HS	459723671	459725887	HORVU.MOREX.r3.4HG0385950.1	Elongator complex protein 6	PF09807,PF09807	IPR018627,IPR018627
4HS	459726311	459730330	HORVU.MOREX.r3.4HG0385960.1	Protein kinase-like protein	PF00069	IPR011009,IPR000719
4HS	459731183	459741539	HORVU.MOREX.r3.4HG0385970.1	TBC1 domain family member 8B	PF00566	IPR000195
4HS	459989145	459989462	HORVU.MOREX.r3.4HG0385980.1	Dolichyl pyrophosphate Man9GlcNAc2 alpha-1,3-glucosyltransferase	NA	NA
4HS	460224082	460225320	HORVU.MOREX.r3.4HG0385990.1	RING/U-box superfamily protein,putative	PF13639	IPR001841
4HS	460574467	460580651	HORVU.MOREX.r3.4HG0386000.1	Transthyretin-like S-allantoin synthase protein	PF09349,PF00576	IPR023416,IPR014306,IPR018020
4HS	460601033	460605677	HORVU.MOREX.r3.4HG0386020.1	CDP-diacylglycerol--glycerol-3-phosphate 3-phosphatidyltransferase	PF01066	IPR000462,IPR004570
4HS	460766533	460766936	HORVU.MOREX.r3.4HG0386030.1	Homeobox-leucine zipper protein	NA	NA
4HS	460767168	460768338	HORVU.MOREX.r3.4HG0386040.1	LAS seventeen-binding protein 5	NA	NA
4HS	460836340	460837047	HORVU.MOREX.r3.4HG0386050.1	mitogen-activated protein kinase 1	NA	NA
4HS	460885145	460886935	HORVU.MOREX.r3.4HG0386060.1	Pentatricopeptide repeat-containing protein	PF12854,PF01535,PF13041	IPR002885,IPR011990
4HS	460891732	460894032	HORVU.MOREX.r3.4HG0386070.1	transmembrane protein	NA	NA
4HS	460894259	460897126	HORVU.MOREX.r3.4HG0386080.1	Protein MODIFIER OF SNC1 11	NA	NA
4HS	461112086	461113931	HORVU.MOREX.r3.4HG0386090.1	Glutathione-S-transferase	PF13417	IPR004045,IPR010987,IPR012336
4HS	461180134	461180507	HORVU.MOREX.r3.4HG0386100.1	nudix hydrolase homolog 10	NA	NA
4HS	461264555	461269964	HORVU.MOREX.r3.4HG0386110.1	DUF810 family protein	PF05664	IPR008528
4HS	461285709	461286011	HORVU.MOREX.r3.4HG0386120.1	Serine/threonine-protein phosphatase 7 long form-like protein	NA	NA
4HS	461312444	461312821	HORVU.MOREX.r3.4HG0386130.1	Plant stearoyl-acyl-carrier-protein desaturase family protein	NA	NA
4HS	461501480	461501872	HORVU.MOREX.r3.4HG0386170.1	cyclic nucleotide gated channel 9	NA	NA
4HS	461746287	461746664	HORVU.MOREX.r3.4HG0386210.1	Disease resistance protein (TIR-NBS-LRR class) family	NA	NA
4HS	461757824	461758330	HORVU.MOREX.r3.4HG0386250.1	NADH dehydrogenase subunit F	NA	NA
4HS	461799783	461800139	HORVU.MOREX.r3.4HG0386270.1	ternary complex factor MIP1 leucine-zipper protein (Protein of unknown function,DUF547)	NA	NA
4HS	461873360	461876708	HORVU.MOREX.r3.4HG0386280.1	Cytosolic phosphoglucose isomerase	NA	IPR012677
4HS	462073991	462077227	HORVU.MOREX.r3.4HG0386290.1	Valine--trna ligase	NA	NA
4HS	462079105	462082379	HORVU.MOREX.r3.4HG0386300.1	Serine/arginine rich splicing factor,putative	PF00076	IPR000504,IPR012677
4HS	462243553	462246342	HORVU.MOREX.r3.4HG0386330.1	ABC transporter G family member	PF01061,PF00005	IPR013525,IPR003439,IPR027417
4HS	462246949	462247344	HORVU.MOREX.r3.4HG0386340.1	alpha/beta-Hydrolases superfamily protein	NA	NA
4HS	462300152	462300685	HORVU.MOREX.r3.4HG0386370.1	Target of Myb protein 1	NA	NA
4HS	462341111	462341722	HORVU.MOREX.r3.4HG0386380.1	FKBP-type peptidyl-prolyl cis-trans isomerase	NA	NA
4HS	462341932	462342306	HORVU.MOREX.r3.4HG0386390.1	sterol 4-alpha-methyl-oxidase 2-2	NA	NA
4HS	462342429	462348167	HORVU.MOREX.r3.4HG0386400.1	2-amino-3,7-dideoxy-D-threo-hept-6-ulosonate synthase 1	NA	NA
4HS	462513959	462514180	HORVU.MOREX.r3.4HG0386440.1	Splicing factor,arginine/serine-rich 19	NA	NA
4HS	462634148	462634519	HORVU.MOREX.r3.4HG0386450.1	Anthocyanin 3'-O-beta-glucosyltransferase	NA	NA
4HS	462637101	462649987	HORVU.MOREX.r3.4HG0386460.1	Integrator complex subunit 4	NA	IPR016024
4HS	462683842	462684666	HORVU.MOREX.r3.4HG0386470.1	ATP-dependent dethiobiotin synthetase BioD	NA	NA
4HS	463149870	463156254	HORVU.MOREX.r3.4HG0386480.1	Calcium-transporting ATPase	PF00690,PF00122,PF00689	IPR023214,IPR004014,IPR008250,IPR006068,IPR023299,IPR001757
4HS	463156449	463159395	HORVU.MOREX.r3.4HG0386490.1	Receptor-like kinase,putative	PF07714,PF12819	IPR001245,IPR011009,IPR024788
4HS	463187178	463187684	HORVU.MOREX.r3.4HG0386500.1	2-succinyl-5-enolpyruvyl-6-hydroxy-3-cyclohexene-1-carboxylate synthase	NA	NA
4HS	463478110	463479786	HORVU.MOREX.r3.4HG0386520.1	F-box domain containing protein,expressed	NA	NA
4HS	463492051	463492314	HORVU.MOREX.r3.4HG0386530.1	Serine/threonine protein phosphatase 7 long form isogeny	NA	NA
4HS	463511057	463532136	HORVU.MOREX.r3.4HG0386550.1	Cytosine-specific methyltransferase	PF01426,PF00145,PF00385	IPR001025,IPR016197,IPR029063,IPR023780
4HS	464212408	464221851	HORVU.MOREX.r3.4HG0386580.1	centrosomal protein of 135 kDa-like protein	NA	NA
4HS	464278204	464281291	HORVU.MOREX.r3.4HG0386590.1	Ribosomal protein S10	PF00827,PF00338	IPR027486,IPR000439,IPR012678,IPR027486
4HS	464664370	464664588	HORVU.MOREX.r3.4HG0386610.1	Histidine kinase	PF00072	IPR011006,IPR001789
4HS	464668146	464668394	HORVU.MOREX.r3.4HG0386620.1	Zinc finger protein	NA	NA
4HS	464671619	464672047	HORVU.MOREX.r3.4HG0386630.1	ABC-2 type transporter family protein	NA	NA
4HS	464789032	464789406	HORVU.MOREX.r3.4HG0386650.1	TANK-binding kinase 1-binding protein 1	NA	NA
4HS	464790538	464792459	HORVU.MOREX.r3.4HG0386660.1	XH/XS domain-containing family protein	PF03470	IPR005381
4HS	464809594	464810010	HORVU.MOREX.r3.4HG0386670.1	glycosyl hydrolase 9C3	NA	NA
4HS	464810021	464810887	HORVU.MOREX.r3.4HG0386680.1	Membrane-associated kinase regulator-like protein,putative	NA	NA
4HS	465067445	465067744	HORVU.MOREX.r3.4HG0386690.1	Plant invertase/pectin methylesterase inhibitor superfamily	NA	NA
4HS	465165653	465167899	HORVU.MOREX.r3.4HG0386780.1	Ankyrin repeat-containing protein	PF00023,PF13962,PF12796,PF12796	IPR020683,IPR002110,IPR026961,IPR020683,IPR020683
4HS	465335604	465336632	HORVU.MOREX.r3.4HG0386810.1	Pyruvate formate-lyase-activating enzyme	NA	NA
4HS	465533510	465536347	HORVU.MOREX.r3.4HG0386830.1	UDP-glucuronate decarboxylase protein 1	PF16363	IPR016040,IPR016040
4HS	465537041	465537940	HORVU.MOREX.r3.4HG0386840.1	Dirigent protein	PF03018	IPR004265
4HS	465538315	465545134	HORVU.MOREX.r3.4HG0386850.1	DUF3741 family protein	PF14383,PF12552,PF14309	IPR032795,IPR022212,IPR025486
4HS	465549379	465549726	HORVU.MOREX.r3.4HG0386860.1	HAT family dimerisation domain containing protein,expressed	NA	NA
4HS	465551458	465552006	HORVU.MOREX.r3.4HG0386870.1	Cytochrome P450 subunit CYP72A13	PF05699	IPR008906
4HS	465558834	465563603	HORVU.MOREX.r3.4HG0386880.1	Peptidase M50B-like protein	NA	NA
4HS	465704695	465705399	HORVU.MOREX.r3.4HG0386890.1	NAC (No Apical Meristem) domain transcriptional regulator superfamily protein	NA	NA
4HS	465868915	465869768	HORVU.MOREX.r3.4HG0386900.1	Plant protein 1589 of Uncharacterized protein function	PF09713	IPR006476,IPR006476
4HS	466100639	466109732	HORVU.MOREX.r3.4HG0386920.1	ABC transporter ATP-binding protein	PF00005,PF00005,PF00664,PF00664	IPR027417,IPR003439,IPR003439,IPR011527,IPR011527,IPR027417,IPR011527,IPR011527
4HS	466110172	466111975	HORVU.MOREX.r3.4HG0386930.1	PsbP family protein,expressed	PF01789	IPR016123,IPR002683
4HS	466112639	466114493	HORVU.MOREX.r3.4HG0386940.1	Nitric oxide synthase-interacting protein homolog	PF15906,PF04641	IPR031790,IPR027799
4HS	466376535	466377871	HORVU.MOREX.r3.4HG0386950.1	enabled-like protein (DUF1635)	NA	NA
4HS	466382510	466383092	HORVU.MOREX.r3.4HG0386960.1	Disease resistance protein (TIR-NBS-LRR class) family	NA	NA
4HS	466619606	466626091	HORVU.MOREX.r3.4HG0386980.1	Kinesin-like protein	PF00225	IPR027417,IPR001752
4HS	466629259	466630251	HORVU.MOREX.r3.4HG0386990.1	Poly [ADP-ribose] polymerase	NA	NA
4HS	466860538	466861113	HORVU.MOREX.r3.4HG0387000.1	Zinc finger family protein	PF13912,PF13912	IPR007087,IPR007087
4HS	466885177	466885533	HORVU.MOREX.r3.4HG0387010.1	K(+) efflux antiporter 1,chloroplastic	NA	NA
4HS	467204569	467206755	HORVU.MOREX.r3.4HG0387030.1	Histone-lysine N-methyltransferase	PF02182,PF00856,PF05033	IPR003105,IPR001214,IPR007728,IPR015947
4HS	467214098	467215109	HORVU.MOREX.r3.4HG0387040.1	RNA-binding protein	NA	NA
4HS	467220541	467222203	HORVU.MOREX.r3.4HG0387050.1	basic helix-loop-helix (bHLH) DNA-binding superfamily protein	IPR011598	NA
4HS	467326411	467326803	HORVU.MOREX.r3.4HG0387060.1	Disease resistance protein (CC-NBS-LRR class) family	NA	NA
4HS	467388998	467393376	HORVU.MOREX.r3.4HG0387070.1	Arginine biosynthesis bifunctional protein ArgJ	PF01960	IPR002813,IPR016117,IPR002813
4HS	467426931	467427278	HORVU.MOREX.r3.4HG0387090.1	Myb/SANT-like DNA-binding domain protein	PF12776	IPR024752
4HS	467430682	467431373	HORVU.MOREX.r3.4HG0387120.1	Histone H2A	PF16211,PF00125	IPR032454,IPR009072,IPR007125
4HS	467565930	467566307	HORVU.MOREX.r3.4HG0387160.1	F-box domain containing protein	PF00646	IPR001810,IPR001810
4HS	467577111	467577802	HORVU.MOREX.r3.4HG0387200.1	Proton pump interactor,putative	NA	NA
4HS	467613347	467617879	HORVU.MOREX.r3.4HG0387220.1	Mannan endo-1,4-beta-mannosidase-like protein	PF00150	IPR017853,IPR001547
4HS	467938814	467939783	HORVU.MOREX.r3.4HG0387250.1	UDP-apiose/xylose synthase	PF01370	IPR001509,IPR016040
4HS	467955076	467956373	HORVU.MOREX.r3.4HG0387260.1	Exostosin family protein	PF03016	IPR004263
4HS	467959447	467960385	HORVU.MOREX.r3.4HG0387270.1	ATP synthase subunit b	PF00430	IPR002146
4HS	468161302	468170377	HORVU.MOREX.r3.4HG0387300.1	Acyl-CoA N-acyltransferase with RING/FYVE/PHD-type zinc finger protein	PF16135	IPR032308,IPR016181
4HS	468621136	468622848	HORVU.MOREX.r3.4HG0387340.1	ATP-dependent zinc metalloprotease FtsH 1	PF00004	IPR003959,IPR027417
4HS	468954564	468955324	HORVU.MOREX.r3.4HG0387350.1	Sterol 3-beta-glucosyltransferase	NA	NA
4HS	468956915	468957526	HORVU.MOREX.r3.4HG0387360.1	S-adenosyl-L-methionine-dependent methyltransferases superfamily protein	NA	NA
4HS	468957689	468958565	HORVU.MOREX.r3.4HG0387370.1	Disease resistance protein (TIR-NBS-LRR class) family	NA	NA
4HS	469275220	469280029	HORVU.MOREX.r3.4HG0387400.1	Polyadenylate-binding protein	PF00658,PF00076,PF00076,PF00076,PF00076	IPR002004,IPR012677,IPR002004,IPR002004,IPR012677,IPR006515,IPR000504,IPR000504,IPR000504,IPR000504
4HS	469280488	469283429	HORVU.MOREX.r3.4HG0387410.1	ADP-ribosylation factor GTPase-activating protein	PF01412	IPR001164
4HS	469618769	469622428	HORVU.MOREX.r3.4HG0387430.1	RNA-binding family protein	PF00076,PF13865	IPR012677,IPR012677,IPR000504,IPR025715
4HS	469625432	469625746	HORVU.MOREX.r3.4HG0387450.1	Disease resistance protein (TIR-NBS-LRR class)	NA	NA
4HS	469850247	469854190	HORVU.MOREX.r3.4HG0387520.1	UDP-glucuronate decarboxylase protein 6	PF16363	IPR016040,IPR016040
4HS	470308374	470309570	HORVU.MOREX.r3.4HG0387540.1	Cysteine-rich receptor-kinase-like protein	PF01657,PF01657	IPR002902,IPR002902
4HS	470380624	470381652	HORVU.MOREX.r3.4HG0387550.1	NAD(P)H dehydrogenase (Quinone)	PF03358	IPR005025,IPR010089,IPR029039
4HS	470827575	470831687	HORVU.MOREX.r3.4HG0387580.1	Xylosyltransferase 1	PF02485	IPR003406
4HS	470836858	470840045	HORVU.MOREX.r3.4HG0387590.1	Guanosine nucleotide diphosphate dissociation inhibitor	PF00996	IPR018203,IPR023753,IPR023753
4HS	471097643	471100444	HORVU.MOREX.r3.4HG0387600.1	HSP20-like chaperones superfamily protein	NA	NA
4HS	471135077	471137420	HORVU.MOREX.r3.4HG0387610.1	70 kDa heat shock protein	PF00012	IPR013126,IPR029047,IPR029048
4HS	471351327	471352504	HORVU.MOREX.r3.4HG0387640.1	dessication-induced 1VOC superfamily protein	PF00903	IPR004360,IPR029068
4HS	471352942	471353208	HORVU.MOREX.r3.4HG0387650.1	Seed maturation protein PM41	NA	NA
4HS	471523957	471524409	HORVU.MOREX.r3.4HG0387660.1	Leucine-rich repeat-containing protein 7	NA	NA
4HS	471525333	471536330	HORVU.MOREX.r3.4HG0387670.1	Neutral/alkaline non-lysosomal ceramidase	NA	NA
4HS	471530582	471530923	HORVU.MOREX.r3.4HG0387680.1	Protein tweety homolog 1	NA	NA
4HS	471533551	471535303	HORVU.MOREX.r3.4HG0387690.1	Disease resistance protein (TIR-NBS-LRR class) family	NA	NA
4HS	471546438	471546788	HORVU.MOREX.r3.4HG0387730.1	basic helix loop helix (bHLH) DNA-binding superfamily protein	NA	NA
4HS	471546805	471547827	HORVU.MOREX.r3.4HG0387740.1	Zf-RanBP domain-containing protein	NA	NA
4HS	471555852	471556256	HORVU.MOREX.r3.4HG0387820.1	Centriole,cilia and spindle-associated protein	NA	NA
4HS	471756528	471758803	HORVU.MOREX.r3.4HG0387850.1	FMN-binding split barrel	IPR012349,IPR012349	NA
4HS	471896971	471899346	HORVU.MOREX.r3.4HG0387870.1	70 kDa heat shock protein	PF00012	IPR029047,IPR013126,IPR029048
4HS	472453258	472453808	HORVU.MOREX.r3.4HG0387910.1	ATP synthase subunit alpha	PF02874	IPR027417,IPR004100,IPR004100
4HS	472486684	472487256	HORVU.MOREX.r3.4HG0387930.1	Ribosomal protein L5	IPR022803	NA
4HS	472505201	472505680	HORVU.MOREX.r3.4HG0387940.1	ATPase subunit 8	PF06449,PF02326	IPR009455,IPR003319
4HS	472547423	472547782	HORVU.MOREX.r3.4HG0388000.1	Gibberellin 3-beta-dioxygenase 1	NA	NA
4HS	472574372	472574602	HORVU.MOREX.r3.4HG0388070.1	Sodium channel protein type 9 subunit alpha	NA	NA
4HS	472583079	472583306	HORVU.MOREX.r3.4HG0388090.1	casein kinase I-like 8	NA	NA
4HS	472591163	472591357	HORVU.MOREX.r3.4HG0388100.1	myosin-binding protein (Protein of unknown function,DUF593)	NA	NA
4HS	472601240	472601704	HORVU.MOREX.r3.4HG0388110.1	NADH-quinone oxidoreductase subunit D	PF00346	IPR029014,IPR001135
4HS	472642612	472644578	HORVU.MOREX.r3.4HG0388120.1	Dof zinc finger protein	PF02701	IPR003851
4HS	472944781	472953844	HORVU.MOREX.r3.4HG0388130.1	U-box domain-containing protein	PF04564,PF05536,PF00514	IPR016024,IPR003613,IPR008709,IPR000225
4HS	473177538	473177872	HORVU.MOREX.r3.4HG0388140.1	magnesium transporter,putative (DUF803)	PF05653	IPR008521
4HS	473274721	473278889	HORVU.MOREX.r3.4HG0388160.1	Actin-related protein 2/3 complex subunit 4	PF05856	IPR008384
4HS	473308027	473308266	HORVU.MOREX.r3.4HG0388170.1	Malate synthase G	NA	NA
4HS	473417983	473418850	HORVU.MOREX.r3.4HG0388180.1	Protein kinase family protein,putative,expressed	PF00069	IPR000719,IPR011009,IPR011009
4HS	473451970	473452173	HORVU.MOREX.r3.4HG0388190.1	Cytochrome oxidase complex assembly protein	PF08695	IPR014807
4HS	473637408	473638181	HORVU.MOREX.r3.4HG0388210.1	NAC (No Apical Meristem) domain transcriptional regulator superfamily protein	NA	NA
4HS	474038114	474041003	HORVU.MOREX.r3.4HG0388220.1	Clathrin assembly protein,putative,expressed	PF07651	IPR008942,IPR011417
4HS	474043827	474044207	HORVU.MOREX.r3.4HG0388230.1	tRNA/rRNA methyltransferase (SpoU) family protein	NA	NA
4HS	474178668	474185439	HORVU.MOREX.r3.4HG0388240.1	S-acyltransferase	PF01529	IPR001594
4HS	474413270	474415925	HORVU.MOREX.r3.4HG0388250.1	K-box region and MADS-box transcription factor family protein	NA	NA
4HS	474481040	474481533	HORVU.MOREX.r3.4HG0388260.1	UDP-glucuronosyltransferase 1-1	NA	NA
4HS	474755650	474758697	HORVU.MOREX.r3.4HG0388270.1	Ankyrin repeat family protein,putative,expressed	PF12796,PF12796	IPR020683,IPR020683,IPR020683
4HS	475058770	475061228	HORVU.MOREX.r3.4HG0388290.1	Leucine-rich repeat receptor-like protein kinase family protein	PF12819,PF13855	IPR024788,IPR032675,IPR001611
4HS	475206539	475210027	HORVU.MOREX.r3.4HG0388310.1	Protein kinase	PF00069	IPR000719,IPR011009
4HS	475210246	475213685	HORVU.MOREX.r3.4HG0388320.1	ubiquitin carboxyl-terminal hydrolase	NA	NA
4HS	475456873	475457115	HORVU.MOREX.r3.4HG0388330.1	Peptide-N(4)-(N-acetyl-beta-glucosaminyl)asparagine amidase	NA	NA
4HS	475551714	475552055	HORVU.MOREX.r3.4HG0388340.1	Ribosome-recycling factor	NA	NA
4HS	475916088	475916756	HORVU.MOREX.r3.4HG0388390.1	DNA topoisomerase	NA	NA
4HS	475917684	475922938	HORVU.MOREX.r3.4HG0388400.1	Telomere repeat-binding protein 5	IPR009057,IPR029071	NA
4HS	476253032	476253412	HORVU.MOREX.r3.4HG0388420.1	MIRO-related GTP-ase 3	NA	NA
4HS	476264309	476271315	HORVU.MOREX.r3.4HG0388430.1	Oxysterol-binding protein	PF01237	IPR000648
4HS	476841337	476843593	HORVU.MOREX.r3.4HG0388440.1	Haloacid dehalogenase-like hydrolase family protein,putative,expressed	NA	IPR010237,IPR023214,IPR006439
4HS	477256408	477256728	HORVU.MOREX.r3.4HG0388450.1	Dihydroflavonol-4-reductase	NA	NA
4HS	477447684	477450375	HORVU.MOREX.r3.4HG0388460.1	Laccase	PF07732,PF00394,PF07731	IPR011707,IPR017761,IPR001117,IPR008972,IPR011706
4HS	477779626	477780526	HORVU.MOREX.r3.4HG0388470.1	Rotundifolia-like protein	PF08137	IPR012552
4HS	477781157	477781510	HORVU.MOREX.r3.4HG0388480.1	Thyrotropin receptor	NA	NA
4HS	477787222	477788121	HORVU.MOREX.r3.4HG0388490.1	4-hydroxy-tetrahydrodipicolinate reductase	NA	NA
4HS	477820505	477831859	HORVU.MOREX.r3.4HG0388500.1	tRNA (Guanine(26)-N(2))-dimethyltransferase	PF02005	IPR029063,IPR029063,IPR002905,IPR002905
4HS	478019815	478020168	HORVU.MOREX.r3.4HG0388530.1	Chromoplast carotenoid cleavage dioxygenase 4b	NA	NA
4HS	478020311	478022973	HORVU.MOREX.r3.4HG0388540.1	far-red elongated hypocotyl 1	NA	NA
4HS	478428662	478428883	HORVU.MOREX.r3.4HG0388590.1	LINE-1 reverse transcriptase like	NA	NA
4HS	478434417	478436030	HORVU.MOREX.r3.4HG0388600.1	Eukaryotic aspartyl protease family protein,expressed	PF14543,PF14541	IPR032861,IPR021109,IPR032799
4HS	478436234	478436560	HORVU.MOREX.r3.4HG0388610.1	Bromodomain and PHD finger-containing protein 3	NA	NA
4HS	478811824	478813296	HORVU.MOREX.r3.4HG0388680.1	RING/U-box superfamily protein	PF06547,PF13639	IPR010543,IPR001841
4HS	478818177	478818575	HORVU.MOREX.r3.4HG0388710.1	Plant L-ascorbate oxidase	NA	NA
4HS	478821405	478824467	HORVU.MOREX.r3.4HG0388720.1	Hsp70 nucleotide exchange factor fes1	PF08609	IPR013918,IPR016024
4HS	478824630	478826033	HORVU.MOREX.r3.4HG0388730.1	Pentatricopeptide repeat-containing protein	PF01535,PF01535,PF01535,PF13041,PF13041	IPR002885
4HS	478837350	478838330	HORVU.MOREX.r3.4HG0388740.1	Protein FAR1-RELATED SEQUENCE 5	NA	NA
4HS	479037837	479043048	HORVU.MOREX.r3.4HG0388770.1	Protein TOC75-3,chloroplastic	PF01103	IPR000184
4HS	479251641	479254681	HORVU.MOREX.r3.4HG0388780.1	RNA polymerase sigma factor	PF04545,PF04539,PF04542	IPR007630,IPR013325,IPR007624,IPR007627,IPR014284,IPR013324
4HS	479255990	479256220	HORVU.MOREX.r3.4HG0388790.1	Ketol-acid reductoisomerase (NADP(+))	NA	NA
4HS	479363082	479363693	HORVU.MOREX.r3.4HG0388810.1	recQ-mediated instability protein (DUF1767)	NA	NA
4HS	479364346	479367757	HORVU.MOREX.r3.4HG0388820.1	Hydroxyproline-rich glycoprotein-like	NA	NA
4HS	479668470	479670243	HORVU.MOREX.r3.4HG0388840.1	Avr9/Cf-9 rapidly elicited protein	PF11961,PF05003	IPR021864,IPR007700
4HS	479679779	479680192	HORVU.MOREX.r3.4HG0388850.1	2-dehydro-3-deoxyphosphooctonate aldolase 2	NA	NA
4HS	479948389	479957494	HORVU.MOREX.r3.4HG0388860.1	Serine/arginine repetitive matrix protein 1	PF01480	IPR002483,IPR002483
4HS	479961699	479962841	HORVU.MOREX.r3.4HG0388870.1	AT hook motif DNA-binding family protein	PF03479	IPR005175
4HS	480702484	480707141	HORVU.MOREX.r3.4HG0388940.1	Beta-1,3-N-acetylglucosaminyltransferase lunatic fringe	PF04646	IPR006740
4HS	481075187	481079408	HORVU.MOREX.r3.4HG0388950.1	Tropinone reductase-like protein	NA	IPR016040
4HS	481353513	481354419	HORVU.MOREX.r3.4HG0388990.1	3'-N-debenzoyl-2'-deoxytaxol N-benzoyltransferase	PF02458	IPR003480
4HS	481543653	481545690	HORVU.MOREX.r3.4HG0389000.1	Protein phosphatase 2C	PF00481	IPR001932,IPR001932,IPR001932
4HS	481830648	481831139	HORVU.MOREX.r3.4HG0389040.1	RNA-binding family protein	PF00076	IPR012677,IPR000504
4HS	481971293	481974686	HORVU.MOREX.r3.4HG0389060.1	Mannose-1-phosphate guanyltransferase,putative	PF00483,PF00132	IPR005835,IPR001451,IPR029044
4HS	481980661	481981095	HORVU.MOREX.r3.4HG0389090.1	Copia-like polyprotein/retrotransposon	NA	NA
4HS	482241185	482243356	HORVU.MOREX.r3.4HG0389100.1	TOPLESS-related 1	NA	NA
4HS	482243992	482245852	HORVU.MOREX.r3.4HG0389110.1	Threonine dehydratase	PF00291	IPR001926,IPR001926
4HS	482247021	482250646	HORVU.MOREX.r3.4HG0389120.1	Digalactosyldiacylglycerol synthase (Chloroplastic)	PF00534	IPR001296
4HS	482251359	482257427	HORVU.MOREX.r3.4HG0389130.1	Kinase family protein	PF00069	IPR000719,IPR011009
4HS	482422179	482423281	HORVU.MOREX.r3.4HG0389150.1	Peroxisomal membrane protein,putative,expressed	NA	NA
4HS	482427767	482431182	HORVU.MOREX.r3.4HG0389160.1	Myosin heavy chain-related protein	NA	NA
4HS	482457220	482461273	HORVU.MOREX.r3.4HG0389180.1	Serine/threonine-protein phosphatase	PF00149,PF16891	IPR004843,IPR029052,IPR031675
4HS	482681515	482684055	HORVU.MOREX.r3.4HG0389200.1	LIM domain-containing protein 1	PF00412,PF12315	IPR001781,IPR022087
4HS	482685127	482688799	HORVU.MOREX.r3.4HG0389210.1	Mitochondrial carrier protein,expressed	PF00153,PF00153,PF00153	IPR018108,IPR018108,IPR018108,IPR023395
4HS	482994936	482995499	HORVU.MOREX.r3.4HG0389230.1	Histidine--tRNA ligase	NA	NA
4HS	483028770	483033672	HORVU.MOREX.r3.4HG0389240.1	DUF3527 domain protein	PF12043,PF12043	IPR021916,IPR021916
4HS	483033782	483037368	HORVU.MOREX.r3.4HG0389250.1	lipase,putative (DUF620)	PF04788	IPR006873
4HS	483208046	483209747	HORVU.MOREX.r3.4HG0389260.1	Fructose-1,6-bisphosphatase class 1	PF00316	IPR033391
4HS	483229642	483230142	HORVU.MOREX.r3.4HG0389270.1	uridine kinase-like 3	NA	NA
4HS	483345142	483348045	HORVU.MOREX.r3.4HG0389290.1	Nucleotidylyl transferase superfamily protein	NA	NA
4HS	483351948	483352532	HORVU.MOREX.r3.4HG0389300.1	U-box domain-containing protein	NA	IPR016024
4HS	483414068	483418492	HORVU.MOREX.r3.4HG0389310.1	Transducin/WD40 repeat protein	PF00400	IPR017986,IPR001680
4HS	483537124	483537566	HORVU.MOREX.r3.4HG0389320.1	LMBR1 domain-containing 2	PF04791	IPR006876
4HS	483650967	483651820	HORVU.MOREX.r3.4HG0389340.1	Heat-shock protein,putative	PF00011	IPR002068,IPR008978
4HS	483821728	483827019	HORVU.MOREX.r3.4HG0389380.1	Receptor-like protein kinase	PF13855,PF08263,PF00069	IPR032675,IPR011009,IPR001611,IPR013210,IPR000719
4HS	483827729	483828061	HORVU.MOREX.r3.4HG0389390.1	Ribosomal RNA small subunit methyltransferase A	NA	NA
4HS	483915791	483916498	HORVU.MOREX.r3.4HG0389400.1	mitogen-activated protein kinase 1	NA	NA
4HS	483935039	483944080	HORVU.MOREX.r3.4HG0389410.1	SH3 domain-containing protein 1	PF14604	IPR001452,IPR001452
4HS	483956132	483956784	HORVU.MOREX.r3.4HG0389420.1	D-tagatose-1,6-bisphosphate aldolase subunit GatZ	NA	NA
4HS	484417808	484422206	HORVU.MOREX.r3.4HG0389460.1	Enolase-like protein	PF00113,PF03952	IPR020810,IPR020811,IPR029017,IPR029065
4HS	484422752	484424664	HORVU.MOREX.r3.4HG0389470.1	LIM domain-containing protein	PF00412,PF00412	IPR001781,IPR001781
4HS	484425963	484431084	HORVU.MOREX.r3.4HG0389480.1	OTU domain-containing protein	PF02338	IPR003323
4HS	484589242	484589905	HORVU.MOREX.r3.4HG0389500.1	Transmembrane protein	PF06127	IPR009305
4HS	484590212	484617109	HORVU.MOREX.r3.4HG0389510.1	SH3 domain containing protein,expressed	PF00018	IPR001452,IPR016024
4HS	484773083	484773746	HORVU.MOREX.r3.4HG0389520.1	Epoxide hydrolase B	NA	NA
4HS	485160538	485161245	HORVU.MOREX.r3.4HG0389530.1	G-box binding factor 1	NA	NA
4HS	485169984	485173010	HORVU.MOREX.r3.4HG0389540.1	RNA-binding protein	PF00076	IPR000504,IPR012677
4HS	485173579	485176484	HORVU.MOREX.r3.4HG0389550.1	Coronatine-insensitive protein 1	NA	NA
4HS	485470687	485471124	HORVU.MOREX.r3.4HG0389560.1	Chalcone synthase B	NA	NA
4HS	485473994	485477045	HORVU.MOREX.r3.4HG0389570.1	50S ribosomal protein L4	PF00573	IPR013005,IPR023574,IPR002136
4HS	485505475	485509210	HORVU.MOREX.r3.4HG0389580.1	Mitochondrial carrier family	PF00153,PF00153,PF00153	IPR023395,IPR018108
4HS	485594761	485596358	HORVU.MOREX.r3.4HG0389590.1	hydroxysteroid dehydrogenase 3	PF00106	IPR002347,IPR016040
4HS	485715077	485717126	HORVU.MOREX.r3.4HG0389600.1	ATP synthase subunit b 2	NA	NA
4HS	485839901	485842259	HORVU.MOREX.r3.4HG0389610.1	Josephin,putative,expressed	PF02099	IPR006155
4HS	485842434	485846384	HORVU.MOREX.r3.4HG0389620.1	Glycogen synthase	PF13439,PF00534	IPR028098,IPR001296
4HS	485851332	485852005	HORVU.MOREX.r3.4HG0389630.1	protein kinase family protein	NA	NA
4HS	485863901	485864718	HORVU.MOREX.r3.4HG0389640.1	Abscisic acid-deficient 4	PF14108	IPR025461
4HS	486208509	486220050	HORVU.MOREX.r3.4HG0389650.1	Replication factor C large subunit	PF00004	IPR003959,IPR027417,IPR027417,IPR027417
4HS	486416158	486417772	HORVU.MOREX.r3.4HG0389660.1	BTB/POZ domain-containing protein	NA	IPR011333,IPR011044,IPR011044
4HS	486430052	486431939	HORVU.MOREX.r3.4HG0389700.1	C2H2-like zinc finger protein	NA	NA
4HS	486902687	486903360	HORVU.MOREX.r3.4HG0389720.1	protein kinase family protein	NA	NA
4HS	486932758	486937165	HORVU.MOREX.r3.4HG0389730.1	Anthranilate synthase	PF04715,PF00425	IPR006805,IPR005801,IPR015890,IPR005256
4HS	486961137	486963305	HORVU.MOREX.r3.4HG0389740.1	ATP-dependent DNA helicase pif1	PF05970	IPR027417,IPR027417,IPR027417,IPR010285,IPR027417
4HS	487050664	487054505	HORVU.MOREX.r3.4HG0389790.1	Receptor-like kinase	PF00069	IPR000719,IPR011009
4HS	487136269	487136976	HORVU.MOREX.r3.4HG0389800.1	mitogen-activated protein kinase 1	NA	NA
4HS	487248785	487253155	HORVU.MOREX.r3.4HG0389810.1	LAG1 longevity assurance-like protein	PF03798	IPR006634
4HS	487493568	487493870	HORVU.MOREX.r3.4HG0389820.1	Bifunctional uridylyltransferase/uridylyl-removing enzyme	NA	NA
4HS	487497464	487500838	HORVU.MOREX.r3.4HG0389850.1	Calcium-binding EF hand family protein,putative,expressed	NA	IPR011990,IPR011992,IPR011992
4HS	487670568	487675077	HORVU.MOREX.r3.4HG0389860.1	S-ribonuclease binding protein	NA	NA
4HS	487725308	487725520	HORVU.MOREX.r3.4HG0389870.1	Major facilitator superfamily protein	NA	NA
4HS	487726917	487729594	HORVU.MOREX.r3.4HG0389880.1	Selenoprotein K	PF10961	IPR024491
4HS	487812865	487814596	HORVU.MOREX.r3.4HG0389890.1	Strictosidine synthase family protein	PF03088	IPR018119
4HS	487819889	487820251	HORVU.MOREX.r3.4HG0389900.1	D-aminoacid aminotransferase-like PLP-dependent enzymes superfamily protein	NA	NA
4HS	487962376	487962681	HORVU.MOREX.r3.4HG0389910.1	Vesicle-associated membrane protein-associated protein A	NA	NA
4HS	487983074	487983822	HORVU.MOREX.r3.4HG0389970.1	Guanine nucleotide-binding protein subunit beta-like protein	PF03004	IPR004252
4HS	487983889	487984575	HORVU.MOREX.r3.4HG0389980.1	calpain-type cysteine protease family	NA	NA
4HS	488187335	488191512	HORVU.MOREX.r3.4HG0390010.1	Splicing factor 3A subunit 2	PF16835	IPR031781
4HS	488195364	488198491	HORVU.MOREX.r3.4HG0390020.1	Mitochondrial carrier family	PF00153,PF00153	IPR023395,IPR018108,IPR018108
4HS	488544456	488546156	HORVU.MOREX.r3.4HG0390030.1	Nodulation-signaling pathway 2 protein	PF03514	IPR005202
4HS	488547786	488548001	HORVU.MOREX.r3.4HG0390040.1	Phosphoribosylamine--glycine ligase	NA	NA
4HS	488816222	488817190	HORVU.MOREX.r3.4HG0390130.1	ethylene-responsive transcription factor	PF00847	IPR001471,IPR016177
4HS	488818905	488824487	HORVU.MOREX.r3.4HG0390140.1	Vacuolar protein sorting-associated protein 9A	PF02204	IPR003123
4HS	488825901	488826687	HORVU.MOREX.r3.4HG0390160.1	Serine/threonine protein phosphatase 7 long form isogeny	PF10536	IPR019557
4HS	489100275	489100841	HORVU.MOREX.r3.4HG0390180.1	alpha-1,2-Mannosidase	NA	NA
4HS	489116426	489117710	HORVU.MOREX.r3.4HG0390200.1	Late embryogenesis abundant (LEA) hydroxyproline-rich glycoprotein family	PF03168	IPR004864
4HS	489414267	489415061	HORVU.MOREX.r3.4HG0390210.1	transmembrane protein,putative (DUF288)	PF03385	IPR005049
4HS	489415302	489415934	HORVU.MOREX.r3.4HG0390220.1	tRNA (Guanine-N(7)-)-methyltransferase subunit trm82	NA	NA
4HS	489464603	489468772	HORVU.MOREX.r3.4HG0390230.1	Eukaryotic translation initiation factor 4E	PF01652	IPR023398,IPR001040
4HS	489469966	489485328	HORVU.MOREX.r3.4HG0390240.1	Replication factor C large subunit	NA	IPR027417,IPR027417,IPR027417
4HS	489506082	489506387	HORVU.MOREX.r3.4HG0390250.1	Kinesin-associated protein 3	NA	NA
4HS	489507196	489507573	HORVU.MOREX.r3.4HG0390260.1	F-box and associated interaction domains-containing protein	NA	IPR001810
4HS	489708763	489712745	HORVU.MOREX.r3.4HG0390270.1	Protein kinase	PF00069	IPR011009,IPR000719
4HS	489850844	489851845	HORVU.MOREX.r3.4HG0390300.1	Transcription elongation factor SPT5	NA	NA
4HS	489950148	489953203	HORVU.MOREX.r3.4HG0390310.1	Phosphatidylinositol-4-phosphate 5-kinase,putative	PF01504	IPR002498
4HS	490206983	490216765	HORVU.MOREX.r3.4HG0390380.1	Importin-4	PF03810,PF02985,PF12717	IPR001494,IPR016024,IPR016024,IPR016024,IPR000357,IPR032682
4HS	490226765	490227286	HORVU.MOREX.r3.4HG0390390.1	SPOC domain / Transcription elongation factor S-II protein	NA	NA
4HS	490227388	490228482	HORVU.MOREX.r3.4HG0390400.1	Fantastic four-like protein	PF11250	IPR021410
4HS	490579805	490580458	HORVU.MOREX.r3.4HG0390410.1	Magnesium transporter MRS2-C	NA	NA
4HS	490738247	490738816	HORVU.MOREX.r3.4HG0390420.1	Maturase K	NA	NA
4HS	490792352	490799057	HORVU.MOREX.r3.4HG0390430.1	Chaperone protein DnaJ	PF00226	IPR001623,IPR001623
4HS	490801522	490801967	HORVU.MOREX.r3.4HG0390440.1	Rho-associated protein kinase 1	NA	NA
4HS	490989082	490990809	HORVU.MOREX.r3.4HG0390450.1	Phospholipase A2	IPR016090	NA
4HS	491073539	491073862	HORVU.MOREX.r3.4HG0390460.1	Zinc finger C-x8-C-x5-C-x3-H type family protein	NA	NA
4HS	491291991	491292224	HORVU.MOREX.r3.4HG0390520.1	PTS system EIIBC component MW0166	NA	NA
4HS	491292415	491294934	HORVU.MOREX.r3.4HG0390530.1	Basic helix-loop-helix transcription factor	PF00010	IPR011598,IPR011598
4HS	491479262	491479925	HORVU.MOREX.r3.4HG0390540.1	mechanosensitive channel of small conductance-like 9	NA	NA
4HS	491953484	491953753	HORVU.MOREX.r3.4HG0390550.1	Serine/threonine protein phosphatase 7 long form isogeny	NA	NA
4HS	491956044	491956292	HORVU.MOREX.r3.4HG0390560.1	Clavata3/ESR (CLE) gene family member	NA	NA
4HS	492103638	492107588	HORVU.MOREX.r3.4HG0390580.1	Transmembrane protein 62	NA	IPR029052
4HS	492117040	492119425	HORVU.MOREX.r3.4HG0390590.1	Alcohol dehydrogenase	PF00107	IPR016040,IPR013149,IPR011032
4HS	492123196	492125297	HORVU.MOREX.r3.4HG0390600.1	Dynamin family protein,putative,expressed	PF01031,PF00350,PF02212	IPR027417,IPR000375,IPR022812,IPR003130
4HS	492198423	492199086	HORVU.MOREX.r3.4HG0390610.1	Metabotropic glutamate receptor 1	NA	NA
4HS	492292809	492296588	HORVU.MOREX.r3.4HG0390620.1	myosin-binding protein (Protein of unknown function,DUF593)	PF04576	IPR007656
4HS	492597941	492602370	HORVU.MOREX.r3.4HG0390630.1	Protein DENND6A	NA	NA
4HS	492608871	492609200	HORVU.MOREX.r3.4HG0390640.1	Pumilio-like protein	NA	NA
4HS	492857960	492858744	HORVU.MOREX.r3.4HG0390660.1	Blue copper protein	PF02298	IPR003245,IPR008972
4HS	492886042	492886638	HORVU.MOREX.r3.4HG0390680.1	Ethylene-responsive transcription factor	NA	IPR016177
4HS	492887303	492889107	HORVU.MOREX.r3.4HG0390690.1	Leucoanthocyanidin reductase	PF05368	IPR008030,IPR016040
4HS	492890837	492897712	HORVU.MOREX.r3.4HG0390700.1	ERAD-associated E3 ubiquitin-protein ligase component HRD3A	PF08238,PF08238,PF08238,PF08238,PF08238,PF08238,PF08238,PF08238,PF08238	IPR006597,IPR006597,IPR006597,IPR006597,IPR006597,IPR006597,IPR006597,IPR006597,IPR006597
4HS	493213002	493214738	HORVU.MOREX.r3.4HG0390720.1	Glyoxal oxidase,putative,expressed	PF09118,PF07250	IPR015202,IPR009880,IPR014756,IPR011043
4HS	493529289	493530782	HORVU.MOREX.r3.4HG0390740.1	Alpha/beta-Hydrolases superfamily protein	PF07859	IPR029058,IPR013094
4HS	493668389	493671545	HORVU.MOREX.r3.4HG0390750.1	Solute carrier family 40 protein	PF06963	IPR009716
4HS	493772196	493774705	HORVU.MOREX.r3.4HG0390770.1	Regulator of Vps4 activity in the MVB pathway protein,putative	PF03398	IPR005061
4HS	493934782	493935081	HORVU.MOREX.r3.4HG0390780.1	RING/U-box superfamily protein	PF13639	IPR001841
4HS	493936030	493936500	HORVU.MOREX.r3.4HG0390790.1	DNA-directed RNA polymerase subunit beta	NA	NA
4HS	493951575	493952054	HORVU.MOREX.r3.4HG0390810.1	F-box transcription factor	NA	NA
4HS	493954536	493955396	HORVU.MOREX.r3.4HG0390820.1	Regulator of Vps4 activity in the MVB pathway protein,putative	PF03398	IPR005061
4HS	494025753	494026319	HORVU.MOREX.r3.4HG0390840.1	PDZ and LIM domain protein 2	NA	NA
4HS	494036633	494037377	HORVU.MOREX.r3.4HG0390850.1	Zinc finger C-x8-C-x5-C-x3-H type family protein	NA	NA
4HS	494040501	494041123	HORVU.MOREX.r3.4HG0390860.1	LYR motif-containing protein 4	PF05347	IPR008011
4HS	494041273	494044539	HORVU.MOREX.r3.4HG0390870.1	Glycerol-3-phosphate dehydrogenase [NAD(P)+]	NA	NA
4HS	494125253	494158511	HORVU.MOREX.r3.4HG0390910.1	Rho GTPase-activating protein	PF00169,PF00620,PF14389	IPR001849,IPR000198,IPR025757,IPR011993,IPR008936
4HS	494534641	494541793	HORVU.MOREX.r3.4HG0390930.1	Imidazole glycerol phosphate synthase subunit HisF	PF00117,PF00977	IPR017926,IPR006062,IPR004651,IPR011060,IPR010139
4HS	494602427	494603056	HORVU.MOREX.r3.4HG0390950.1	Cellulose synthase	NA	NA
4HS	494816433	494817520	HORVU.MOREX.r3.4HG0390960.1	Ankyrin repeat family protein	PF13962	IPR026961
4HS	495236108	495240806	HORVU.MOREX.r3.4HG0391040.1	Phosphoenolpyruvate carboxykinase (ATP)-like protein	PF01293	IPR001272,IPR008210,IPR001272
4HS	495242709	495248603	HORVU.MOREX.r3.4HG0391050.1	Protein FAR1-RELATED SEQUENCE 7	PF03101,PF03101	IPR004330,IPR004330
4HS	495553906	495554208	HORVU.MOREX.r3.4HG0391060.1	Leiomodin-1	NA	NA
4HS	495563892	495568147	HORVU.MOREX.r3.4HG0391070.1	Chaperone protein DnaJ	PF11833	IPR021788
4HS	495571764	495572111	HORVU.MOREX.r3.4HG0391080.1	ARM repeat superfamily protein	NA	NA
4HS	495573107	495573415	HORVU.MOREX.r3.4HG0391090.1	Pectinesterase	NA	NA
4HS	495575040	495581096	HORVU.MOREX.r3.4HG0391100.1	Beta-galactosidase	PF01301,PF02140	IPR017853,IPR031330,IPR008979,IPR000922
4HS	495581669	495585428	HORVU.MOREX.r3.4HG0391110.1	Protein FAR1-RELATED SEQUENCE 6	PF10551,PF03101	IPR018289,IPR004330
4HS	495954664	495957401	HORVU.MOREX.r3.4HG0391120.1	zinc finger MYM-type-like protein	PF05699,PF14291	IPR008906,IPR025398,IPR012337
4HS	495959206	495963504	HORVU.MOREX.r3.4HG0391130.1	E3 ubiquitin-protein ligase	NA	NA
4HS	496021150	496025186	HORVU.MOREX.r3.4HG0391140.1	Chorismate synthase	PF01264	IPR000453,IPR000453,IPR000453

## Sheet: TableS3 GenesChr4HL QTLregion
Supplementary Table S3: List of candidates susceptibility genes identified in the QTL region at barley Chr4HL upon inoculation of the P. teres f. maculata isolate Den2.6 on the RIL barley population TR 326 x PI 67381. Gene ID is based on he annotation of the H. vulgare MorexV3 genome.
Sequence-region Chr4HL 3.4Mb (position 600704827-604135461)
Chromosome	Position Start (bp)	Position End (bp)	Gene ID	Description	PFAM	INTERPRO SCAN
chr4HL	600703451	600706115	HORVU.MOREX.r3.4HG0414960.1	Apyrase	PF01150	IPR000407
chr4HL	600760382	600761681	HORVU.MOREX.r3.4HG0414970.1	3'-N-debenzoyl-2'-deoxytaxol N-benzoyltransferase	PF02458	IPR003480
chr4HL	600781577	600784976	HORVU.MOREX.r3.4HG0415030.1	Acid phosphatase 1	PF03767	IPR005519,IPR023214,IPR010028
chr4HL	600873700	600874982	HORVU.MOREX.r3.4HG0415050.1	Nicotianamine synthase	PF03059	IPR029063,IPR004298
chr4HL	600878433	600879330	HORVU.MOREX.r3.4HG0415060.1	rRNA N-glycosidase	NA	IPR001574
chr4HL	600938012	600941454	HORVU.MOREX.r3.4HG0415090.1	Bestrophin/UPF0187	PF01062	IPR021134
chr4HL	601472270	601476187	HORVU.MOREX.r3.4HG0415160.1	DUF3527 domain protein	PF12043,PF12043	IPR021916,IPR021916
chr4HL	601482459	601483742	HORVU.MOREX.r3.4HG0415170.1	3'-N-debenzoyl-2'-deoxytaxol N-benzoyltransferase	PF02458	IPR003480
chr4HL	601500017	601501697	HORVU.MOREX.r3.4HG0415180.1	Jasmonate-zim-domain protein	PF06200,PF09425	IPR010399,IPR018467
chr4HL	601535222	601544088	HORVU.MOREX.r3.4HG0415230.1	basic helix-loop-helix (bHLH) DNA-binding superfamily protein	PF00010	IPR011598,IPR011598
chr4HL	601566000	601569047	HORVU.MOREX.r3.4HG0415250.1	Pentatricopeptide repeat-containing protein	PF01535,PF13041,PF13812	IPR002885
chr4HL	601571789	601572343	HORVU.MOREX.r3.4HG0415260.1	NBS-LRR disease resistance protein	NA	IPR027417
chr4HL	601615148	601621461	HORVU.MOREX.r3.4HG0415290.1	Basic helix-loop-helix (BHLH) Transcription Factor	PF00010	IPR011598,IPR011598
chr4HL	601627654	601629075	HORVU.MOREX.r3.4HG0415300.1	RNA-directed DNA polymerase (reverse transcriptase)-related family protein	PF13966	IPR026960
chr4HL	601652557	601652931	HORVU.MOREX.r3.4HG0415320.1	Non-structural protein NS1	NA	NA
chr4HL	601729791	601733093	HORVU.MOREX.r3.4HG0415330.1	Cytochrome P450 family cinnamate 4-hydroxylase	PF00067	IPR001128,IPR001128
chr4HL	601760190	601765625	HORVU.MOREX.r3.4HG0415340.1	ATP-binding cassette transporter subfamily A member	PF00005	IPR003439,IPR027417
chr4HL	601810049	601810648	HORVU.MOREX.r3.4HG0415350.1	DNA topoisomerase	NA	NA
chr4HL	601811485	601812995	HORVU.MOREX.r3.4HG0415360.1	F-box family protein	NA	IPR001810
chr4HL	601853564	601854058	HORVU.MOREX.r3.4HG0415400.1	myosin heavy chain,embryonic smooth protein	NA	NA
chr4HL	602046060	602048127	HORVU.MOREX.r3.4HG0415410.1	AT hook motif DNA-binding family protein	PF03479	IPR005175
chr4HL	602053484	602055456	HORVU.MOREX.r3.4HG0415420.1	Tubulin beta chain	PF03953,PF00091	IPR018316,IPR008280
chr4HL	602085760	602087165	HORVU.MOREX.r3.4HG0415430.1	MYB-related transcription factor	PF00249	IPR009057,IPR001005
chr4HL	602104336	602106756	HORVU.MOREX.r3.4HG0415460.1	Receptor-like protein kinase,putative	PF12819,PF07714	IPR011009,IPR024788,IPR001245
chr4HL	602108235	602112631	HORVU.MOREX.r3.4HG0415470.1	Signal recognition particle protein	PF00448,PF02881,PF04086	IPR027417,IPR000897,IPR013822,IPR011012,IPR007222
chr4HL	602118540	602120841	HORVU.MOREX.r3.4HG0415480.1	Scarecrow transcription factor family protein	PF03514	IPR005202
chr4HL	602228319	602229180	HORVU.MOREX.r3.4HG0415490.1	14 kDa proline-rich protein DC2.15	PF14547	IPR027923,IPR016140
chr4HL	602355481	602356714	HORVU.MOREX.r3.4HG0415550.1	transmembrane protein,putative (DUF1218)	PF06749	IPR009606
chr4HL	602416817	602417567	HORVU.MOREX.r3.4HG0415570.1	Cortical cell-delineating protein	PF14547	IPR027923,IPR016140
chr4HL	602427034	602427522	HORVU.MOREX.r3.4HG0415590.1	Bifunctional inhibitor/lipid-transfer protein/seed storage 2S albumin superfamily protein	PF14547	IPR027923,IPR016140
chr4HL	602447685	602449269	HORVU.MOREX.r3.4HG0415600.1	HXXXD-type acyl-transferase family protein	PF02458	IPR003480
chr4HL	602451589	602456695	HORVU.MOREX.r3.4HG0415610.1	Flavin-containing monooxygenase	PF00743,PF00743	IPR023753,IPR020946
chr4HL	602505138	602506385	HORVU.MOREX.r3.4HG0415620.1	Protein phosphatase 1 regulatory subunit 12A	NA	NA
chr4HL	602530932	602535662	HORVU.MOREX.r3.4HG0415630.1	T-box transcription factor,putative (DUF863)	PF05904	IPR008581
chr4HL	602541398	602542345	HORVU.MOREX.r3.4HG0415640.1	C2H2-like zinc finger protein	NA	NA
chr4HL	602595571	602596158	HORVU.MOREX.r3.4HG0415650.1	Ethylene-responsive transcription factor,putative	PF00847	IPR001471,IPR016177
chr4HL	602602775	602603504	HORVU.MOREX.r3.4HG0415660.1	Zinc finger-like protein	NA	NA
chr4HL	602678222	602678557	HORVU.MOREX.r3.4HG0415670.1	2-C-methyl-D-erythritol 2,4-cyclodiphosphate synthase	NA	NA
chr4HL	602678891	602679346	HORVU.MOREX.r3.4HG0415680.1	F-box protein (DUF295)	PF03478	IPR005174
chr4HL	602697873	602699567	HORVU.MOREX.r3.4HG0415690.1	Sodium transporter	PF02386,PF02386	IPR003445,IPR003445
chr4HL	602911030	602912896	HORVU.MOREX.r3.4HG0415720.1	Endoglucanase	PF12796,PF00759,PF09478	IPR008928,IPR020683,IPR001701,IPR020683,IPR019028
chr4HL	602921152	602923115	HORVU.MOREX.r3.4HG0415740.1	Phosphoenolpyruvate carboxykinase (ATP)	PF01293,PF00759	IPR001272,IPR008928,IPR001701
chr4HL	602958576	602959889	HORVU.MOREX.r3.4HG0415760.1	Werner Syndrome-like exonuclease	PF01612	IPR012337,IPR002562
chr4HL	603033648	603039985	HORVU.MOREX.r3.4HG0415770.1	Oxysterol-binding protein	PF01237	IPR011993,IPR011993,IPR000648
chr4HL	603040380	603045470	HORVU.MOREX.r3.4HG0415780.1	Nitrate transporter 1.1	PF00854	IPR020846,IPR020846,IPR000109
chr4HL	603127012	603129060	HORVU.MOREX.r3.4HG0415820.1	Expansin protein	PF03330,PF01357	IPR009009,IPR007117,IPR007117,IPR009009
chr4HL	603143947	603144391	HORVU.MOREX.r3.4HG0415840.1	PRLI-interacting factor	NA	NA
chr4HL	603283567	603286328	HORVU.MOREX.r3.4HG0415860.1	Serine/threonine-protein kinase	PF07714,PF08276,PF00954	IPR001245,IPR003609,IPR011009,IPR000858
chr4HL	603455717	603457158	HORVU.MOREX.r3.4HG0415890.1	Aspartic proteinase nepenthesin-1	PF14543,PF14541	IPR032861,IPR021109,IPR032799
chr4HL	603502643	603503095	HORVU.MOREX.r3.4HG0415900.1	RING/U-box superfamily protein	PF13639	IPR001841
chr4HL	603505187	603505525	HORVU.MOREX.r3.4HG0415910.1	Auxin-responsive family protein	NA	NA
chr4HL	603513897	603514199	HORVU.MOREX.r3.4HG0415920.1	Bifunctional polymyxin resistance protein ArnA	NA	NA
chr4HL	603541417	603541953	HORVU.MOREX.r3.4HG0415940.1	RING/U-box superfamily protein	PF13639	IPR001841
chr4HL	603598758	603599685	HORVU.MOREX.r3.4HG0415950.1	P-glycoprotein 5	NA	NA
chr4HL	603672037	603690216	HORVU.MOREX.r3.4HG0415960.1	CCR4-NOT transcription complex subunit 1	PF16415,PF04054,PF16418,PF12842,PF16417	IPR032191,IPR007196,IPR032194,IPR024557,IPR032193
chr4HL	603692761	603701448	HORVU.MOREX.r3.4HG0415970.1	2-phosphoglycerate kinase,putative,expressed	NA	IPR027417
chr4HL	603737426	603744502	HORVU.MOREX.r3.4HG0415980.1	RING/U-box superfamily protein	PF12274	IPR022059
chr4HL	603896143	603906454	HORVU.MOREX.r3.4HG0416040.1	ATP-dependent RNA helicase	PF00271,PF04408,PF07717	IPR001650,IPR027417,IPR007502,IPR011709
chr4HL	603957437	603958240	HORVU.MOREX.r3.4HG0416060.1	Chaperone protein clpB	NA	IPR027417
chr4HL	603980345	603982486	HORVU.MOREX.r3.4HG0416070.1	GATA transcription factor	PF00320	IPR000679
chr4HL	604054347	604056048	HORVU.MOREX.r3.4HG0416080.1	Matrix metalloproteinase	PF01471,PF00413	IPR002477,IPR001818,IPR002477
chr4HL	604059829	604061897	HORVU.MOREX.r3.4HG0416090.1	2-oxoglutarate (2OG) and Fe(II)-dependent oxygenase superfamily protein	PF03171,PF14226	IPR005123,IPR026992
chr4HL	604068560	604075105	HORVU.MOREX.r3.4HG0416120.1	PHD-finger protein	NA	IPR011011
chr4HL	604112040	604112429	HORVU.MOREX.r3.4HG0416140.1	Serine/threonine protein phosphatase 7 long form isogeny	PF10536	IPR019557
chr4HL	604114141	604116103	HORVU.MOREX.r3.4HG0416150.1	auxin canalization protein (DUF828)	PF05703,PF08458	IPR008546,IPR013666
chr4HL	604125877	604128311	HORVU.MOREX.r3.4HG0416170.1	Methionyl-tRNA formyltransferase	PF00551	IPR002376,IPR002376
chr4HL	604134565	604139883	HORVU.MOREX.r3.4HG0416190.1	Coatomer subunit alpha	PF06957,PF04053,PF00400,	IPR010714,IPR006692,IPR001680,IPR017986

## Sheet: TableS4 GenesChr7H QTLregion
Supplementary Table S4: List of candidates susceptibility genes identified in the QTL region at barley Chr7HL upon inoculation of the P. teres f. maculata isolate G76S on the RIL barley population TR 326 x PI 67381. Gene ID is based on he annotation of the H. vulgare MorexV3 genome.
Sequence-region Chr7HL 1.1Mb (position 618945338-619957421)
Chromosome	Position Start (bp)	Position End (bp)	Gene ID	Description	PFAM	INTERPRO SCAN
7HL	618948732	618950573	HORVU.MOREX.r3.7HG0747280.1	WD40 repeat-like protein	PF09384,PF00400	IPR018983,IPR001680,IPR017986
7HL	618959280	618963449	HORVU.MOREX.r3.7HG0747300.1	Disease resistance protein	PF00931	IPR002182,IPR032675,IPR027417
7HL	619057042	619060078	HORVU.MOREX.r3.7HG0747330.1	RING/U-box superfamily protein	PF13639	IPR001841
7HL	619102499	619102810	HORVU.MOREX.r3.7HG0747340.1	disease resistance protein (TIR-NBS class)	NA	NA
7HL	619151847	619152159	HORVU.MOREX.r3.7HG0747350.1	Plant cadmium resistance 2	PF04749	IPR006461,IPR006461
7HL	619162236	619163749	HORVU.MOREX.r3.7HG0747360.1	Disease resistance protein RGA2	NA	NA
7HL	619164002	619164547	HORVU.MOREX.r3.7HG0747370.1	NBS-LRR-like resistance protein	NA	IPR032675
7HL	619165066	619166136	HORVU.MOREX.r3.7HG0747380.1	Pm3-like disease resistance protein	PF00931	IPR002182,IPR027417
7HL	619243579	619244091	HORVU.MOREX.r3.7HG0747400.1	C3H4 type zinc finger protein (DUF23)	NA	NA
7HL	619306335	619307956	HORVU.MOREX.r3.7HG0747410.1	GDSL esterase/lipase	PF00657	IPR001087
7HL	619345800	619356059	HORVU.MOREX.r3.7HG0747430.1	Protein ENHANCED DISEASE RESISTANCE 2	PF07059,PF01852	IPR009769,IPR011993,IPR002913
7HL	619377604	619379007	HORVU.MOREX.r3.7HG0747450.1	Pentatricopeptide repeat-containing protein	PF01535,PF01535	IPR002885,IPR011009
7HL	619379017	619380796	HORVU.MOREX.r3.7HG0747460.1	Multidrug resistance protein ABC transporter family	PF00005	IPR003439,IPR027417
7HL	619420280	619423436	HORVU.MOREX.r3.7HG0747470.1	BURP domain protein RD22	PF03181	IPR004873
7HL	619490362	619497121	HORVU.MOREX.r3.7HG0747490.1	O-methyltransferase-like protein	PF08100,PF00891	IPR012967,IPR001077,IPR011991,IPR029063
7HL	619546106	619548041	HORVU.MOREX.r3.7HG0747500.1	Carbonic anhydrase	PF00194	IPR001148,IPR001148
7HL	619604780	619605217	HORVU.MOREX.r3.7HG0747530.1	Cysteine protease	PF08246	IPR013201
7HL	619610968	619612284	HORVU.MOREX.r3.7HG0747540.1	GDSL esterase/lipase	PF00657	IPR001087,IPR013830
7HL	619719371	619723884	HORVU.MOREX.r3.7HG0747560.1	Protein phosphatase 2C	PF00481	IPR001932,IPR001932
7HL	619726511	619728887	HORVU.MOREX.r3.7HG0747570.1	4-hydroxy-tetrahydrodipicolinate reductase	PF05173,PF01113	IPR022663,IPR000846,IPR016040
7HL	619735414	619735854	HORVU.MOREX.r3.7HG0747580.1	DNA-directed RNA polymerase subunit	PF00623,PF04997	IPR000722,IPR007080
7HL	619763445	619764943	HORVU.MOREX.r3.7HG0747600.1	12-oxophytodienoate reductase-like protein	PF00724	IPR001155
7HL	619777407	619779386	HORVU.MOREX.r3.7HG0747610.1	Eukaryotic aspartyl protease family protein	PF14543,PF14541	IPR021109,IPR032861,IPR032799
7HL	619791644	619791904	HORVU.MOREX.r3.7HG0747630.1	abscisic aldehyde oxidase 3	NA	NA
7HL	619792187	619792732	HORVU.MOREX.r3.7HG0747640.1	LINE-1 reverse transcriptase like	NA	NA
7HL	619794608	619794955	HORVU.MOREX.r3.7HG0747660.1	P-loop containing nucleoside triphosphate hydrolases superfamily protein	NA	NA
7HL	619846884	619852810	HORVU.MOREX.r3.7HG0747690.1	Hydroxycinnamoyl-CoA shikimate/quinate hydroxycinnamoyltransferase	PF02458	IPR003480

## Sheet: TableS5 TR326 x PI67 Markers
Supplementary Table S5: List of markers and genotype calls in the barley RIL population TR 326 × PI 67381
0 = TR326
1 = PI67381
3 = Missing Data
Marker	TR326	PI67381	#1	#2	#3	#4	#5	#6	#7	#8	#9	#10	#11	#12	#13	#14	#15	#16	#17	#18	#19	#20	#21	#22	#23	#24	#25	#26	#27	#28	#29	#30	#31	#32	#33	#34	#35	#36	#37	#38	#39	#40	#41	#42	#43	#44	#45	#46	#47
JHI-Hv50k-2016-2199	0	1	1	1	0	0	1	1	1	1	0	0	0	0	1	0	0	1	1	0	1	0	1	0	1	1	0	0	0	1	1	1	1	1	0	1	0	1	1	0	0	1	0	1	1	0	1	1	1
SCRI-RS-194326	0	1	1	1	0	0	1	1	1	1	0	0	0	0	1	0	0	1	1	0	1	0	0	0	1	1	0	0	0	1	0	1	1	1	0	1	0	1	1	0	0	1	0	1	1	0	3	1	1
JHI-Hv50k-2016-4942	0	1	1	1	0	0	1	1	1	1	0	0	0	1	1	0	0	1	1	1	0	0	0	0	1	1	0	0	0	1	0	1	1	1	0	1	0	1	1	0	0	1	0	1	1	0	3	1	1
JHI-Hv50k-2016-4897	0	1	1	1	0	0	1	1	1	1	0	0	0	1	1	0	0	1	1	1	0	0	0	0	1	1	0	0	0	1	0	1	1	1	0	1	0	1	1	0	0	1	0	1	1	0	3	1	1
SCRI-RS-60145	0	1	1	1	0	0	1	1	1	1	0	0	0	1	1	0	0	1	1	1	0	0	0	0	1	1	0	0	0	1	0	1	1	1	0	1	0	1	1	0	0	1	0	1	1	0	3	1	1
SCRI-RS-162524	0	1	1	1	0	0	1	1	1	1	0	0	0	1	1	0	0	1	1	1	0	0	0	0	1	1	0	0	0	1	0	1	1	1	0	1	0	1	1	0	0	1	0	1	1	1	3	1	1
JHI-Hv50k-2016-8553	0	1	1	1	0	0	1	1	1	1	0	0	0	1	1	0	0	1	1	1	0	0	0	0	1	1	0	1	0	1	0	1	1	1	0	1	0	1	1	0	0	1	0	1	1	1	1	1	1
JHI-Hv50k-2016-9237	0	1	1	1	0	0	1	1	1	1	0	0	0	1	1	0	0	1	1	1	0	0	0	0	1	1	0	3	0	1	0	1	1	1	0	1	0	1	1	0	0	1	0	1	1	1	3	1	1
JHI-Hv50k-2016-9842	0	1	1	1	0	0	1	1	1	1	0	0	0	1	1	0	0	1	1	1	0	0	0	0	1	1	0	3	0	1	0	1	1	1	0	1	0	1	1	0	0	1	0	1	1	1	3	1	1
JHI-Hv50k-2016-9963	0	1	1	1	0	0	1	1	1	1	0	0	0	1	1	0	0	1	1	1	0	0	0	0	1	1	0	3	0	1	0	1	1	1	0	1	0	1	1	0	0	1	0	1	1	1	3	1	1
JHI-Hv50k-2016-10222	0	1	1	1	0	0	1	1	1	1	1	0	0	1	1	0	0	1	1	1	0	0	0	0	1	1	0	3	0	1	0	1	1	1	0	1	0	1	1	0	0	1	0	1	0	1	0	1	1
JHI-Hv50k-2016-10336	0	1	1	1	0	0	1	1	1	1	1	1	0	1	1	0	0	1	1	1	0	0	0	0	1	1	0	3	0	1	0	1	1	1	0	1	0	1	1	0	0	1	0	1	0	1	0	1	1
JHI-Hv50k-2016-10391	0	1	1	1	0	0	1	1	0	1	1	1	0	1	1	0	0	1	1	1	0	0	0	0	1	1	0	3	0	1	0	1	1	1	0	1	0	1	1	0	0	1	0	1	0	1	0	1	1
JHI-Hv50k-2016-10642	0	1	1	1	0	0	0	1	0	1	1	1	0	1	1	0	0	1	1	1	0	0	0	1	1	1	0	3	0	1	0	1	1	1	0	1	0	0	1	0	0	1	0	1	0	1	0	1	1
JHI-Hv50k-2016-11028	0	1	1	1	0	0	0	1	0	1	1	1	0	1	1	0	0	1	1	1	0	0	0	1	1	1	1	3	0	1	0	1	1	1	0	1	0	0	1	0	0	1	0	1	0	1	0	1	1
JHI-Hv50k-2016-11229	0	1	1	1	0	0	0	1	0	1	1	1	0	1	1	0	0	1	1	1	0	0	0	1	1	1	1	3	0	1	0	1	1	1	0	1	1	0	1	0	0	1	0	1	0	1	0	1	1
JHI-Hv50k-2016-11646	0	1	1	1	0	0	0	1	0	1	1	1	0	1	1	0	0	1	1	1	0	0	0	1	1	1	1	3	0	1	0	1	1	1	0	1	1	0	1	0	0	1	0	1	0	1	0	1	1
JHI-Hv50k-2016-11768	0	1	1	1	0	0	0	0	0	1	1	1	0	1	1	0	0	1	1	1	0	0	0	1	1	0	1	3	0	1	0	0	1	1	0	1	1	0	1	0	0	1	0	1	0	1	0	1	1
JHI-Hv50k-2016-12117	0	1	1	1	0	0	0	0	0	1	1	1	0	1	1	0	0	1	1	1	0	0	0	1	1	0	1	1	1	1	0	0	1	1	0	1	1	0	1	1	0	1	0	1	0	1	0	1	1
JHI-Hv50k-2016-12802	0	1	1	1	0	0	0	0	0	1	1	1	0	1	1	0	0	1	1	1	0	0	0	0	1	0	1	1	1	1	1	0	1	1	0	1	1	0	1	1	0	1	0	1	0	1	0	1	1
BOPA2-12-30877	0	1	1	1	0	0	0	0	0	1	1	1	0	1	1	0	0	1	1	1	0	0	0	0	1	0	1	1	1	1	1	0	1	1	0	1	1	0	1	1	0	1	1	1	0	1	0	1	1
JHI-Hv50k-2016-12866	0	1	1	1	0	0	0	0	0	0	1	1	0	1	1	0	0	1	1	1	0	0	0	0	1	0	1	1	1	1	1	0	1	1	0	1	1	0	1	1	0	1	1	1	0	1	0	1	1
JHI-Hv50k-2016-12930	0	1	1	1	0	0	0	0	0	0	1	1	0	1	1	0	1	1	1	1	0	0	0	0	1	0	1	1	1	1	1	0	1	1	0	1	1	0	1	1	0	1	1	1	0	1	0	1	1
JHI-Hv50k-2016-12956	0	1	1	1	0	0	0	0	0	0	1	1	0	1	1	0	1	1	1	1	0	0	0	0	1	0	0	1	1	1	1	0	1	1	0	1	1	0	1	1	0	1	1	1	0	1	0	1	1
JHI-Hv50k-2016-13004	0	1	1	0	0	0	0	0	0	0	1	1	0	1	1	0	1	1	1	1	0	0	0	0	1	0	0	1	1	1	1	0	1	1	0	1	1	0	1	1	0	1	1	1	0	1	0	1	1
BOPA1-6792-1945	0	1	1	0	0	0	0	0	0	1	1	1	0	1	1	1	1	1	1	1	0	0	0	0	1	0	0	1	1	1	1	0	1	1	0	1	1	0	1	1	0	1	1	1	0	0	0	1	1
SCRI-RS-169091	0	1	1	0	0	1	0	0	0	1	1	1	0	1	1	1	1	1	1	1	0	0	0	0	1	0	0	1	1	1	1	0	1	1	0	1	1	0	0	1	0	1	1	1	0	0	0	1	1
JHI-Hv50k-2016-14617	0	1	1	0	0	1	0	0	0	1	1	1	0	1	1	1	3	1	1	1	0	0	0	0	1	0	0	1	1	0	1	0	1	1	0	1	1	0	0	1	0	1	1	1	0	0	0	1	1
BOPA1-5318-436	0	1	1	0	0	1	0	0	0	1	1	1	0	1	1	1	3	1	1	1	0	0	0	0	1	0	0	1	1	0	1	0	1	1	0	1	1	0	0	1	0	1	1	1	0	0	0	1	1
JHI-Hv50k-2016-14683	0	1	0	0	0	1	0	0	0	1	1	1	0	1	1	1	3	1	1	1	0	0	0	0	1	0	0	1	1	0	1	0	1	1	0	1	1	0	0	1	0	1	1	1	0	0	0	1	1
JHI-Hv50k-2016-14899	0	1	0	0	0	1	0	0	0	1	1	1	0	1	1	1	3	1	1	1	0	0	0	0	1	0	0	0	1	0	1	0	1	1	0	1	1	0	0	1	0	1	1	1	0	0	0	1	1
JHI-Hv50k-2016-14788	0	1	0	0	0	1	0	0	0	1	1	1	0	1	1	1	3	1	1	1	0	0	0	1	1	0	0	0	1	0	1	0	1	1	0	1	1	0	0	1	0	1	1	1	0	0	0	1	1
JHI-Hv50k-2016-15027	0	1	0	0	0	1	0	0	0	1	1	1	0	1	1	1	0	1	1	1	0	0	0	1	0	0	0	0	1	0	1	0	1	1	0	1	1	0	0	1	0	1	1	1	0	0	0	1	1
JHI-Hv50k-2016-15118	0	1	0	0	0	1	0	0	0	3	1	1	0	1	1	1	0	1	1	1	0	0	0	1	0	0	0	0	1	0	1	0	1	1	0	1	1	0	0	1	0	1	1	1	0	0	0	1	1
JHI-Hv50k-2016-15206	0	1	0	0	0	1	0	0	0	3	1	1	0	1	1	1	0	1	1	1	0	0	0	1	0	0	0	0	1	0	1	0	1	1	0	1	1	0	0	1	0	1	1	1	0	0	0	1	1
JHI-Hv50k-2016-15317	0	1	1	0	0	1	0	0	0	3	1	1	0	1	1	1	0	1	1	1	0	0	0	1	0	0	0	0	1	0	1	0	1	1	0	1	1	0	0	1	0	1	1	1	0	0	0	1	1
JHI-Hv50k-2016-15407	0	1	1	0	0	1	0	0	0	3	1	1	0	1	1	1	0	1	1	1	0	0	0	1	0	0	0	0	1	0	1	0	1	1	0	1	1	0	0	1	0	1	1	1	0	0	0	1	1
JHI-Hv50k-2016-16125	0	1	0	0	0	1	0	0	0	1	1	1	0	1	1	1	0	1	1	1	1	1	0	1	0	0	0	0	1	0	1	0	1	1	0	1	1	0	0	1	0	1	0	1	0	0	0	1	1
JHI-Hv50k-2016-16143	0	1	0	0	0	1	0	0	0	1	1	1	0	1	1	1	0	1	1	1	1	0	0	1	0	0	0	0	1	0	1	0	1	1	0	1	1	0	0	1	0	1	0	1	0	0	0	1	1
JHI-Hv50k-2016-16250	0	1	0	0	0	1	0	0	0	1	1	1	0	1	1	1	0	1	1	1	1	0	0	1	0	0	0	0	1	0	1	0	1	1	0	1	1	0	0	1	0	1	0	1	0	0	0	1	1
JHI-Hv50k-2016-16624	0	1	0	0	0	1	0	0	0	3	1	1	0	1	1	1	0	1	1	1	1	0	0	1	0	0	0	0	1	0	1	0	1	1	0	1	1	0	0	1	0	1	0	1	0	0	0	1	0
JHI-Hv50k-2016-16839	0	1	0	0	0	1	0	0	0	3	1	1	0	1	1	1	0	1	1	1	1	0	0	0	0	0	0	0	1	3	1	0	1	1	0	1	1	0	0	1	0	1	0	1	0	0	0	1	0
JHI-Hv50k-2016-17042	0	1	0	0	0	1	0	0	0	0	1	1	0	3	1	1	0	0	1	1	1	0	0	0	0	0	0	0	1	3	1	0	1	1	0	1	1	0	0	1	0	1	0	1	0	0	1	3	0
JHI-Hv50k-2016-17218	0	1	0	0	0	1	0	0	0	0	1	1	0	3	1	1	0	0	1	1	1	0	0	0	0	0	0	0	0	3	1	0	1	1	0	1	1	0	0	1	0	1	0	1	0	0	1	3	0
JHI-Hv50k-2016-17441	0	1	0	0	0	1	0	0	0	0	1	1	0	3	1	1	0	0	1	1	1	0	0	0	0	0	0	0	0	3	1	0	1	1	0	1	1	0	0	1	0	1	0	1	0	0	1	3	0
BOPA2-12-30336	0	1	0	0	0	1	0	0	0	0	1	1	0	3	1	1	0	0	1	1	1	0	0	0	0	0	0	0	0	3	1	0	1	1	0	1	1	0	0	1	0	1	0	1	0	0	1	3	0
JHI-Hv50k-2016-17526	0	1	0	0	0	3	0	0	0	0	1	1	0	3	1	1	0	0	1	1	1	0	0	0	0	0	0	0	0	3	1	0	1	1	0	1	1	0	0	1	0	1	0	1	0	0	1	3	0
JHI-Hv50k-2016-17967	0	1	0	0	0	3	0	0	0	0	1	1	0	3	1	1	0	0	1	1	1	0	0	0	0	0	0	0	0	3	1	0	1	1	0	1	1	0	0	1	0	1	0	1	0	0	1	3	0
JHI-Hv50k-2016-18400	0	1	0	0	0	3	0	0	0	0	1	1	0	3	1	1	0	0	1	1	1	0	0	0	0	0	0	0	0	3	1	0	1	1	0	1	1	0	0	1	0	1	0	1	0	0	1	3	0
JHI-Hv50k-2016-18529	0	1	0	0	0	3	0	0	0	0	1	1	0	3	1	1	0	0	1	1	1	0	0	0	0	0	0	0	0	3	1	0	1	1	0	1	1	0	0	1	0	1	0	1	0	0	1	3	0
JHI-Hv50k-2016-18534	0	1	0	0	0	3	0	0	0	0	1	1	0	3	1	1	0	0	1	1	1	0	0	0	0	0	0	0	0	3	1	0	1	1	0	1	1	0	0	1	0	1	0	1	0	0	3	3	0
BOPA1-2265-363	0	1	3	0	0	3	0	0	0	0	1	1	0	3	1	1	0	0	1	1	1	0	0	0	0	0	0	0	0	3	0	0	1	1	0	1	1	0	0	1	0	1	0	1	0	0	1	1	0
BOPA1-5019-879	0	1	0	0	0	0	0	0	0	0	1	1	0	0	1	1	0	0	1	1	1	0	0	0	0	0	0	0	0	0	0	0	1	1	0	1	1	0	0	1	0	1	0	1	0	0	1	1	0
JHI-Hv50k-2016-20069	0	1	3	0	0	3	0	0	0	0	1	1	0	3	1	1	0	0	1	1	1	0	0	0	0	0	0	0	0	3	0	0	1	1	0	1	1	0	0	1	0	1	0	1	0	0	1	1	0
JHI-Hv50k-2016-20391	0	1	3	0	0	3	0	0	0	0	1	1	0	1	1	1	0	0	1	1	1	0	0	0	0	0	0	0	0	3	0	0	1	1	0	1	0	0	0	1	0	1	0	1	0	0	1	1	0
JHI-Hv50k-2016-23595	0	1	1	0	0	1	0	0	0	0	1	1	0	1	1	1	0	0	1	1	1	0	0	0	0	0	0	0	0	3	0	0	1	1	0	1	0	0	0	1	0	1	0	1	0	0	1	1	0
JHI-Hv50k-2016-25062	0	1	3	0	0	3	0	0	0	0	1	1	0	1	1	1	0	0	1	1	1	0	0	0	0	0	0	0	0	3	0	0	1	1	0	1	0	1	0	1	0	1	0	1	0	0	1	1	0
JHI-Hv50k-2016-26439	0	1	3	0	0	3	0	0	0	0	0	1	0	1	1	1	0	0	1	1	1	0	0	0	0	0	0	0	0	3	0	0	1	1	0	1	0	1	0	1	0	1	0	1	0	0	1	1	0
JHI-Hv50k-2016-28315	0	1	3	0	0	3	0	0	0	0	0	1	0	1	1	1	0	0	1	1	3	0	0	0	0	0	0	0	0	0	0	0	1	1	0	1	0	1	0	1	0	1	0	1	0	0	1	1	0
SCRI-RS-156506	0	1	3	0	0	3	0	0	0	0	0	1	0	1	1	1	0	0	1	1	3	0	0	0	0	0	0	0	0	0	0	0	1	1	0	1	0	1	0	1	0	1	0	1	0	0	1	1	0
JHI-Hv50k-2016-29539	0	1	3	0	0	3	0	0	0	0	0	1	0	1	1	1	0	0	1	1	3	0	0	0	0	0	0	0	0	0	0	0	1	1	0	1	0	1	0	1	0	1	0	1	0	0	1	1	0
JHI-Hv50k-2016-29753	0	1	3	0	0	3	0	0	0	0	0	1	0	1	1	1	0	0	1	1	3	0	0	0	0	0	0	0	0	0	0	0	1	1	0	1	0	1	0	1	0	1	0	1	0	0	1	1	0
JHI-Hv50k-2016-30240	0	1	3	0	0	3	0	0	0	0	1	1	0	1	1	1	0	0	1	1	3	0	0	0	0	0	0	0	0	0	0	0	1	1	0	1	0	1	0	1	0	1	0	1	0	0	1	1	0
JHI-Hv50k-2016-31323	0	1	3	0	0	3	0	0	0	0	1	1	0	1	1	1	0	0	1	1	0	0	0	0	0	0	0	0	0	0	0	0	1	1	0	1	0	0	0	1	0	1	0	1	0	0	1	1	0
JHI-Hv50k-2016-31799	0	1	3	0	0	1	0	0	0	0	1	1	0	1	1	1	0	0	1	1	0	0	0	0	0	0	0	0	0	0	0	0	1	1	0	1	0	0	0	1	0	1	0	1	0	0	1	1	0
JHI-Hv50k-2016-31832	0	1	3	0	0	1	0	0	0	0	1	1	0	1	1	1	0	0	1	1	0	0	0	0	0	0	0	0	0	0	0	0	1	1	0	1	0	0	0	1	1	1	0	1	0	0	1	1	0
JHI-Hv50k-2016-32560	0	1	3	0	0	1	0	0	0	0	1	1	0	1	1	1	0	0	1	1	0	0	0	0	0	0	0	0	0	0	0	0	1	1	0	1	0	0	0	1	1	1	0	1	0	0	1	1	0
JHI-Hv50k-2016-32893	0	1	3	0	0	1	0	0	0	0	1	1	0	1	1	1	0	0	1	1	0	0	0	0	0	0	0	0	0	0	0	0	1	1	0	1	0	0	0	1	1	1	0	1	0	0	1	1	0
JHI-Hv50k-2016-33161	0	1	3	0	0	1	0	0	0	0	1	1	0	1	1	1	0	0	1	1	0	0	0	0	0	0	0	0	0	0	0	0	1	1	0	1	0	0	0	1	1	1	0	1	0	0	1	1	0
JHI-Hv50k-2016-33389	0	1	3	0	0	1	0	0	0	0	1	1	0	1	1	1	0	0	1	1	0	0	0	0	0	0	0	0	0	0	0	0	1	1	0	1	0	0	0	1	1	1	0	1	0	0	1	1	0
JHI-Hv50k-2016-34230	0	1	1	0	0	1	0	0	0	0	1	1	0	1	1	1	0	0	1	1	0	0	0	0	0	0	0	0	0	0	0	0	1	1	0	1	0	0	0	1	1	1	0	1	0	0	1	1	0
JHI-Hv50k-2016-34522	0	1	1	0	0	1	0	0	0	0	1	1	0	1	1	1	0	0	1	1	0	0	0	0	0	0	0	0	0	0	0	0	1	1	0	1	0	0	0	1	1	1	0	1	0	0	1	1	0
JHI-Hv50k-2016-35714	0	1	1	0	0	1	0	0	0	0	1	1	0	1	1	1	1	0	1	1	0	0	0	0	0	0	0	0	0	0	0	0	1	1	0	1	0	0	0	1	1	1	0	1	0	0	1	1	0
JHI-Hv50k-2016-35809	0	1	1	0	0	1	0	0	0	0	1	1	0	1	1	1	1	0	1	1	0	0	0	0	0	0	0	0	0	0	0	0	1	1	0	1	0	0	0	1	1	1	0	1	0	0	1	1	0
JHI-Hv50k-2016-35883	0	1	1	0	0	1	0	0	0	0	1	1	0	1	1	1	1	0	1	1	0	0	0	0	0	0	0	0	0	0	0	1	1	1	0	1	0	0	0	1	1	1	0	1	0	0	1	1	0
JHI-Hv50k-2016-36270	0	1	1	0	0	1	0	0	0	0	1	1	0	1	1	1	1	0	1	1	0	0	0	0	0	0	0	0	0	0	0	1	1	1	0	1	0	0	0	1	1	1	0	1	0	0	1	1	0
BOPA2-12-10166	0	1	1	0	0	1	0	0	0	0	1	1	0	1	1	1	1	0	1	1	0	0	0	0	0	0	0	0	0	0	0	1	1	1	0	1	0	0	0	1	1	1	0	1	0	0	1	1	1
JHI-Hv50k-2016-36433	0	1	1	0	0	1	0	0	0	0	1	1	0	1	1	1	1	0	1	1	0	0	0	0	0	0	0	0	0	0	0	1	1	1	0	1	0	0	0	1	1	1	0	1	0	0	1	1	1
BOPA1-1670-369	0	1	1	0	0	1	0	0	0	0	1	1	0	1	1	1	1	0	1	1	0	0	0	0	0	0	0	1	0	0	0	1	1	1	0	1	0	0	0	1	0	1	0	1	1	0	1	1	1
JHI-Hv50k-2016-37026	0	1	1	0	0	1	0	0	0	0	1	1	0	1	1	1	1	0	1	1	0	0	0	0	0	0	0	1	0	0	0	1	1	1	0	1	0	0	0	1	0	1	0	1	1	0	1	1	1
JHI-Hv50k-2016-37094	0	1	1	0	0	1	0	0	0	0	1	1	0	1	1	1	1	0	1	1	0	0	0	0	0	0	0	1	0	0	0	1	1	1	0	1	1	0	0	1	0	1	0	1	1	0	1	1	0
JHI-Hv50k-2016-37148	0	1	1	0	0	1	0	0	0	0	1	1	0	1	1	1	1	1	1	1	0	0	0	0	0	0	0	1	0	0	0	1	1	1	0	1	1	0	0	1	0	1	0	1	1	0	1	1	0
JHI-Hv50k-2016-37296	0	1	1	0	0	1	0	0	0	0	1	1	0	1	1	1	1	1	1	1	0	0	0	0	0	0	0	1	0	0	0	1	1	1	0	1	1	0	0	1	0	1	0	1	1	0	1	1	0
JHI-Hv50k-2016-37481	0	1	1	0	0	1	0	0	0	0	1	1	0	1	1	1	1	1	1	1	0	0	0	0	0	0	0	1	0	0	0	1	1	1	0	1	1	0	0	1	0	1	0	1	1	0	1	1	0
SCRI-RS-160234	0	1	1	1	0	1	0	0	0	0	1	1	0	1	1	1	1	1	1	1	0	0	0	0	0	0	0	1	0	0	0	1	1	1	0	1	1	0	0	1	0	1	0	1	1	0	1	3	0
BOPA1-6655-978	0	1	1	1	0	1	0	0	0	0	1	1	0	1	1	1	1	1	1	1	0	0	1	0	0	0	0	1	0	0	0	1	1	1	0	1	1	0	0	1	0	1	0	1	1	0	1	3	0
BOPA1-12492-541	0	1	1	1	0	1	0	0	0	0	1	1	0	1	1	1	1	1	0	1	0	0	1	0	0	0	0	1	0	0	0	1	1	1	0	1	1	0	0	1	0	1	0	1	0	0	1	3	0
JHI-Hv50k-2016-37615	0	1	1	1	0	1	0	0	0	0	1	1	0	1	1	1	1	1	0	1	0	0	1	0	0	0	0	1	0	0	0	1	1	1	0	1	1	0	0	1	0	1	0	1	0	0	1	3	0
JHI-Hv50k-2016-37631	0	1	1	1	0	1	0	0	0	0	1	1	0	1	1	1	1	1	0	1	0	0	1	0	0	0	0	1	0	0	0	1	1	1	0	1	1	0	0	1	0	1	0	1	0	0	1	3	0
JHI-Hv50k-2016-37871	0	1	0	1	0	1	0	0	0	1	1	1	0	1	0	1	1	1	0	1	0	0	1	1	0	0	0	0	0	0	1	1	1	1	0	1	0	0	0	1	0	1	0	1	0	0	1	3	0
JHI-Hv50k-2016-38034	0	1	0	1	0	1	0	0	0	1	1	1	0	1	0	1	1	1	0	1	0	0	1	1	0	0	0	0	0	0	1	1	1	1	0	1	0	0	0	1	0	1	0	1	0	0	1	3	0
SCRI-RS-236576	0	1	0	1	0	1	0	0	0	1	1	1	0	1	0	1	1	1	0	1	0	0	1	1	0	0	0	0	0	0	1	1	1	1	0	1	0	0	0	1	0	1	0	1	0	0	1	1	0
JHI-Hv50k-2016-39014	0	1	0	1	0	1	0	0	0	1	1	1	0	1	0	1	1	0	0	1	0	0	1	1	0	0	0	0	0	0	1	1	1	1	0	1	0	0	0	1	0	1	0	1	0	0	1	1	0
JHI-Hv50k-2016-39019	0	1	0	1	0	1	0	0	0	1	1	1	0	1	0	1	1	0	0	1	0	0	1	1	0	0	0	0	0	0	1	1	1	1	0	1	0	0	0	1	0	1	0	1	0	0	1	1	0
JHI-Hv50k-2016-39220	0	1	0	1	0	1	0	0	0	1	1	1	0	1	0	1	1	0	0	1	0	0	1	1	0	0	0	0	0	0	1	1	1	1	0	1	0	0	1	1	0	1	0	1	0	0	1	1	0
JHI-Hv50k-2016-39281	0	1	0	1	0	1	0	0	0	1	1	1	0	1	0	1	1	0	0	1	0	0	1	1	0	0	0	0	0	0	1	1	1	1	0	1	0	0	1	1	0	1	0	1	0	0	0	1	0
JHI-Hv50k-2016-39526	0	1	0	1	0	1	0	0	0	1	1	1	0	1	0	1	1	0	0	1	0	0	1	1	0	0	0	0	0	0	1	1	1	1	0	1	0	0	1	1	0	1	0	1	0	0	0	1	0
JHI-Hv50k-2016-40820	0	1	0	1	0	1	0	0	0	1	1	1	0	1	0	1	1	0	0	1	0	0	1	1	0	0	0	0	0	0	1	1	1	1	0	1	0	0	1	1	0	1	0	1	0	0	0	1	0
JHI-Hv50k-2016-40910	0	1	0	1	0	1	0	0	0	1	1	1	0	1	0	1	1	0	0	1	0	0	1	1	0	0	0	0	0	0	1	1	1	1	0	1	0	0	1	1	0	1	0	1	0	0	0	1	0
JHI-Hv50k-2016-41046	0	1	0	1	0	1	0	0	0	1	1	1	1	3	0	1	1	0	0	1	0	0	1	1	0	0	0	0	0	0	1	1	1	1	0	1	0	0	1	1	0	1	0	0	0	0	0	1	0
JHI-Hv50k-2016-41432	0	1	0	1	0	1	0	0	0	1	1	1	1	3	0	1	1	0	0	1	0	0	1	1	0	0	0	0	0	0	1	1	1	1	0	1	0	0	1	1	0	1	0	0	0	0	0	1	0
JHI-Hv50k-2016-41782	0	1	0	1	0	1	0	0	0	1	1	1	1	3	0	1	1	0	0	1	0	0	1	1	0	0	0	0	0	0	1	1	1	1	0	1	0	0	1	1	0	1	0	0	0	0	0	1	0
JHI-Hv50k-2016-42071	0	1	0	1	0	1	0	0	0	1	1	1	1	3	0	1	1	0	0	1	0	0	1	1	0	1	0	0	0	0	1	1	1	1	0	1	0	0	1	1	0	1	0	0	0	0	0	1	0
JHI-Hv50k-2016-42205	0	1	0	1	0	1	0	0	0	1	1	1	1	3	0	1	1	0	0	1	0	0	1	1	0	1	0	0	0	0	1	1	1	1	0	1	0	0	1	1	0	1	0	0	0	0	0	1	0
JHI-Hv50k-2016-42801	0	1	0	1	0	1	0	0	0	1	1	1	1	3	0	1	1	1	0	1	0	0	1	1	0	1	0	0	0	0	1	1	1	1	0	1	0	0	1	1	0	1	0	0	0	0	0	1	0
JHI-Hv50k-2016-43178	0	1	0	1	0	1	0	0	0	1	1	1	1	3	0	1	1	1	0	1	0	0	1	1	0	1	0	0	0	0	1	1	1	1	0	1	0	0	1	1	0	1	0	0	0	0	0	1	0
SCRI-RS-188909	0	1	0	1	0	1	0	0	0	1	1	1	1	3	0	1	1	1	0	1	0	0	1	1	0	1	0	0	0	1	1	1	1	1	0	1	0	0	1	1	0	1	0	0	0	0	0	1	0
JHI-Hv50k-2016-43435	0	1	0	1	0	1	0	0	0	1	1	1	1	3	0	1	1	1	0	1	0	0	1	1	0	1	0	0	0	1	1	1	1	1	0	1	0	0	1	1	0	1	0	0	0	0	0	1	0
JHI-Hv50k-2016-43846	0	1	0	1	0	1	0	0	0	1	1	1	1	0	0	1	1	1	0	1	0	0	1	1	0	1	0	0	0	1	1	1	1	1	0	1	0	0	1	1	0	1	0	0	0	0	0	1	0
JHI-Hv50k-2016-43790	0	1	0	1	0	1	0	0	0	1	1	1	1	3	0	1	1	1	0	1	0	0	1	1	0	1	0	0	0	1	1	1	1	1	0	1	0	0	1	1	0	1	0	0	0	0	0	1	0
JHI-Hv50k-2016-44011	0	1	0	1	0	1	0	0	0	1	1	1	1	3	0	1	1	1	0	1	0	0	1	1	0	1	0	0	0	1	1	1	1	1	0	1	0	0	1	1	0	1	0	0	0	0	0	1	0
JHI-Hv50k-2016-45022	0	1	0	1	0	1	0	0	0	1	1	1	1	3	0	1	1	1	0	1	0	0	1	1	0	1	0	0	0	1	1	1	1	1	0	1	0	0	1	1	0	1	0	0	0	0	0	1	0
JHI-Hv50k-2016-45487	0	1	1	1	0	1	0	0	0	1	1	1	1	3	0	1	1	1	0	1	0	0	1	1	0	1	0	0	0	1	1	1	1	1	0	1	0	0	1	1	0	1	0	0	0	0	0	1	0
SCRI-RS-141421	0	1	1	1	0	1	0	0	0	1	1	1	1	3	0	1	1	1	0	1	0	0	1	1	0	1	0	0	0	1	1	1	1	1	0	1	0	0	1	1	0	1	0	0	0	0	0	1	0
JHI-Hv50k-2016-46372	0	1	1	1	0	1	0	0	0	1	1	1	1	3	0	1	1	1	0	1	0	0	1	1	0	1	0	0	0	1	1	1	1	1	0	1	0	0	1	1	0	1	0	0	0	0	0	1	0
JHI-Hv50k-2016-46615	0	1	1	1	0	1	0	0	0	1	1	1	1	3	0	1	1	1	0	1	0	0	1	1	0	1	0	0	0	1	1	1	1	1	0	1	0	0	1	1	0	1	0	0	0	0	0	1	0
JHI-Hv50k-2016-46998	0	1	1	1	0	1	0	0	0	1	1	1	1	3	0	1	1	1	0	1	0	0	1	1	0	1	0	0	0	1	1	1	1	1	0	1	0	0	1	1	0	1	0	0	0	0	0	1	0
JHI-Hv50k-2016-47125	0	1	1	1	0	1	0	0	0	1	1	1	1	3	0	1	1	1	0	1	0	0	1	1	0	1	0	0	0	1	1	1	1	1	0	1	0	0	1	1	0	1	0	0	0	0	0	1	0
JHI-Hv50k-2016-47250	0	1	1	1	0	1	0	0	0	1	1	1	1	3	0	1	1	1	0	1	1	0	1	1	0	1	0	0	0	1	1	1	1	1	0	1	0	0	1	1	0	1	0	0	0	0	0	1	0
JHI-Hv50k-2016-47513	0	1	1	1	0	1	0	0	0	1	1	1	1	3	0	1	1	1	0	1	1	0	1	1	0	1	0	0	0	1	1	1	0	1	0	1	0	0	1	1	0	1	0	0	0	0	0	1	0
JHI-Hv50k-2016-47368	0	1	1	1	0	1	0	0	0	1	1	1	1	3	0	1	1	1	0	1	1	0	1	1	0	1	0	0	0	1	1	1	0	1	0	1	0	0	1	1	0	1	0	0	0	0	0	1	0
JHI-Hv50k-2016-47595	0	1	1	1	0	1	0	0	0	1	1	1	1	3	0	1	1	1	0	1	1	0	1	1	0	1	0	0	0	1	1	1	0	1	0	1	0	0	1	1	0	1	0	0	0	0	0	1	0
JHI-Hv50k-2016-47717	0	1	1	1	0	1	0	0	0	1	1	1	1	3	0	1	1	1	0	1	1	0	1	1	0	1	0	0	0	1	1	1	0	1	0	1	0	0	1	1	0	1	1	0	1	0	1	1	0
JHI-Hv50k-2016-48069	0	1	1	1	0	1	0	0	0	1	1	1	1	3	0	1	1	1	0	1	1	0	1	1	0	1	0	0	0	0	1	1	0	1	0	1	0	0	1	1	0	1	1	0	1	0	1	1	0
JHI-Hv50k-2016-48112	0	1	1	1	0	1	0	0	0	1	1	1	1	3	0	1	1	1	0	1	1	0	1	1	0	1	0	0	0	0	1	1	0	1	0	1	0	0	1	1	0	1	1	0	1	0	1	1	0
JHI-Hv50k-2016-48696	0	1	1	1	0	1	0	0	0	1	1	1	1	3	0	1	1	1	0	1	1	0	1	1	0	1	0	0	0	0	1	1	0	1	0	1	0	0	1	1	0	1	1	0	1	0	1	1	0
JHI-Hv50k-2016-48752	0	1	1	1	0	1	1	0	0	1	1	1	1	3	0	1	1	1	0	1	1	0	1	1	0	1	0	0	0	0	1	1	0	1	0	1	0	0	1	1	0	1	1	0	1	0	1	1	0
JHI-Hv50k-2016-49722	0	1	1	1	0	1	1	0	0	1	1	1	1	1	0	1	1	1	0	1	1	1	1	1	0	1	0	0	0	0	1	1	1	1	0	1	0	0	1	1	0	1	0	1	1	0	1	1	0
JHI-Hv50k-2016-50139	0	1	1	0	0	1	1	0	0	0	1	1	1	1	0	1	1	1	0	1	1	1	1	1	0	1	0	0	0	0	1	1	1	1	0	0	0	0	1	1	0	1	0	1	1	0	1	1	0
JHI-Hv50k-2016-50422	0	1	1	0	0	1	1	0	0	0	1	1	1	1	0	1	0	1	0	1	1	1	1	1	1	1	0	0	0	0	1	1	1	1	0	0	0	0	1	1	0	1	0	1	1	0	1	0	0
JHI-Hv50k-2016-50646	0	1	1	0	0	1	1	0	0	0	1	1	1	1	0	1	0	1	0	1	1	1	1	1	1	1	0	0	0	0	1	1	1	1	0	0	0	0	1	1	0	1	0	1	1	0	1	0	0
JHI-Hv50k-2016-50906	0	1	1	0	0	1	1	0	0	0	1	1	1	1	0	1	0	1	0	1	1	1	1	1	1	1	0	0	0	0	1	1	1	1	0	0	1	0	1	1	0	1	0	1	1	0	1	0	0
JHI-Hv50k-2016-50954	0	1	1	0	0	1	1	0	0	0	1	1	1	1	1	1	0	1	0	1	1	1	1	1	1	1	0	0	0	0	1	1	1	1	0	0	1	0	1	1	0	1	0	1	1	0	1	0	0
JHI-Hv50k-2016-51136	0	1	1	0	0	1	1	0	0	0	1	1	1	1	1	1	0	1	0	1	1	1	1	1	0	1	0	0	0	0	1	1	1	1	0	0	1	0	1	1	0	1	0	1	1	0	1	0	0
JHI-Hv50k-2016-51199	0	1	1	0	0	1	1	0	0	0	1	1	1	1	1	1	0	1	0	1	1	1	1	1	0	1	0	0	0	0	1	1	1	1	0	0	1	0	1	1	0	1	0	1	1	0	1	0	0
JHI-Hv50k-2016-51428	0	1	1	0	0	1	1	0	0	0	1	1	1	1	1	1	0	1	0	1	1	1	1	1	0	1	0	0	0	0	1	1	1	1	0	0	1	0	1	1	0	1	0	1	1	0	1	0	0
JHI-Hv50k-2016-52080	0	1	1	0	0	1	1	0	0	0	1	1	1	1	1	1	0	1	0	1	1	1	1	1	0	1	0	0	0	0	1	1	1	0	0	0	1	0	1	1	0	1	0	1	1	0	1	0	0
JHI-Hv50k-2016-52119	0	1	1	0	0	1	1	0	0	0	1	1	1	1	1	1	0	1	0	1	1	1	1	1	0	1	0	0	0	0	1	1	1	0	0	0	1	0	1	1	0	1	0	1	1	0	1	0	0
JHI-Hv50k-2016-52623	0	1	1	0	0	1	1	0	0	0	1	1	1	1	1	0	0	1	0	1	1	1	1	1	0	1	0	0	0	0	1	1	1	0	0	0	1	0	0	1	0	1	0	1	1	0	1	1	0
SCRI-RS-130577	0	1	1	0	0	1	1	0	0	0	1	1	1	1	1	0	0	1	0	1	1	1	1	1	0	1	0	0	0	0	1	1	1	0	0	0	1	0	0	1	0	1	0	1	1	0	1	1	0
JHI-Hv50k-2016-54041	0	1	0	1	0	1	1	0	0	0	1	1	1	1	1	0	0	1	0	1	1	1	1	1	0	1	0	1	0	0	1	1	1	0	0	0	1	0	0	1	0	1	0	1	1	0	1	1	0
SCRI-RS-138629	0	1	0	1	0	1	1	0	0	0	1	1	1	1	1	0	0	1	0	1	1	1	1	1	0	1	0	1	0	0	1	1	1	0	0	0	1	0	0	1	0	1	0	1	1	0	1	1	0
JHI-Hv50k-2016-54613	0	1	0	1	0	1	1	0	0	0	1	1	1	1	1	0	0	1	0	1	1	1	1	1	0	1	0	1	1	0	1	1	1	0	0	0	1	0	0	1	0	1	0	1	1	0	1	1	0
JHI-Hv50k-2016-54260	0	1	0	1	0	1	1	0	0	0	1	1	1	1	1	0	0	1	0	1	1	1	1	1	0	1	0	1	0	0	1	1	1	0	0	0	1	0	0	1	0	1	0	1	1	0	1	1	0
JHI-Hv50k-2016-55341	0	1	0	1	0	1	1	0	0	0	1	1	1	1	1	0	0	1	0	1	1	1	1	1	0	1	0	1	0	0	1	1	1	0	0	0	1	0	0	1	0	1	0	1	1	0	1	1	0
JHI-Hv50k-2016-55662	0	1	0	1	0	1	1	0	0	0	1	1	1	1	1	0	0	1	0	1	1	1	1	1	0	0	0	1	0	0	1	1	1	0	0	0	1	0	0	1	0	1	0	1	1	0	1	1	0
JHI-Hv50k-2016-55865	0	1	0	1	0	1	1	0	0	0	1	1	1	1	1	0	0	1	0	1	1	1	1	1	0	0	0	1	1	0	1	1	1	0	0	0	1	0	0	1	0	1	0	1	1	0	1	1	0
JHI-Hv50k-2016-56732	0	1	0	1	0	1	1	0	0	0	1	1	1	1	1	0	0	1	0	1	1	1	1	1	0	0	0	1	1	0	1	1	1	0	0	0	1	0	0	1	0	1	0	1	1	0	1	1	0
JHI-Hv50k-2016-56688	0	1	0	1	0	1	1	0	0	0	1	1	1	1	1	0	0	1	0	1	1	1	1	1	0	0	0	1	1	0	1	1	1	0	0	0	1	0	0	1	0	1	0	1	1	0	1	1	0
JHI-Hv50k-2016-58514	0	1	1	0	0	1	0	1	1	1	0	0	1	1	1	0	1	1	1	0	1	0	0	0	0	1	0	0	1	1	0	1	0	1	1	1	1	0	1	0	1	0	0	1	1	0	1	0	1
JHI-Hv50k-2016-60597	0	1	0	0	0	1	0	1	1	1	0	0	1	1	1	0	1	1	1	0	1	0	0	0	0	1	0	0	1	1	0	1	0	1	1	1	1	0	1	0	1	0	0	1	1	0	1	0	1
JHI-Hv50k-2016-62306	0	1	0	0	0	1	0	1	1	1	0	0	1	1	1	0	1	1	1	0	1	0	0	0	0	1	0	0	1	1	0	1	0	1	1	1	1	0	1	0	1	1	0	1	1	0	1	0	1
JHI-Hv50k-2016-62455	0	1	0	0	0	1	0	1	1	1	0	0	1	1	1	0	1	1	1	0	1	0	0	0	0	1	0	0	1	1	0	1	0	1	1	1	1	0	1	0	1	1	0	1	1	0	1	0	1
JHI-Hv50k-2016-62546	0	1	0	0	0	1	0	1	1	1	0	0	1	1	1	0	1	1	1	0	1	0	0	0	0	0	0	0	1	1	0	1	0	1	1	1	1	0	1	0	1	1	0	1	1	0	1	0	1
SCRI-RS-168604	0	1	0	0	0	1	0	1	1	1	0	0	1	1	1	0	1	1	1	0	1	0	0	0	0	0	0	0	1	1	0	1	0	1	1	1	1	0	1	0	1	1	0	1	1	0	1	0	1
SCRI-RS-187012	0	1	0	0	0	1	0	1	1	1	0	0	1	1	1	0	1	1	1	0	1	0	0	0	0	0	0	0	1	1	0	1	0	1	1	1	1	0	1	0	1	1	0	1	1	0	1	0	1
SCRI-RS-213799	0	1	0	0	0	1	0	1	1	1	0	0	1	1	1	0	1	1	1	0	1	0	0	0	0	0	0	0	1	1	0	1	0	1	1	1	1	0	1	0	1	1	0	1	1	0	1	1	1
JHI-Hv50k-2016-64719	0	1	0	0	0	1	0	1	1	1	0	0	1	1	1	0	1	1	1	0	1	0	0	0	0	0	0	0	1	1	0	1	0	1	1	0	1	0	1	0	1	1	0	1	1	0	1	1	1
JHI-Hv50k-2016-65610	0	1	0	0	1	1	0	1	1	1	0	0	1	1	1	0	1	1	1	0	1	0	0	0	0	0	0	0	1	1	0	1	0	1	1	0	1	0	1	0	1	1	0	1	1	0	1	1	3
JHI-Hv50k-2016-66683	0	1	0	0	1	1	0	1	1	1	0	0	1	1	1	0	1	1	1	0	1	0	0	0	0	0	0	0	1	1	0	1	0	1	1	0	1	0	1	0	1	1	0	1	1	0	1	1	3
JHI-Hv50k-2016-66747	0	1	0	0	1	1	0	1	1	0	0	0	1	0	1	0	1	1	1	0	1	0	0	0	0	0	0	0	1	1	0	1	0	1	1	0	1	0	1	0	1	1	0	1	1	0	1	1	3
JHI-Hv50k-2016-67059	0	1	0	0	1	1	0	1	1	0	0	0	1	0	1	0	1	1	1	0	1	0	0	0	0	0	0	0	1	1	0	1	0	1	1	0	1	0	1	0	1	1	0	1	1	0	1	1	3
JHI-Hv50k-2016-67451	0	1	0	0	1	1	0	1	1	0	0	0	1	0	1	0	1	1	1	0	1	0	0	0	0	0	0	0	1	1	0	1	0	1	1	0	1	0	1	0	1	1	0	1	1	0	1	1	3
JHI-Hv50k-2016-67492	0	1	0	0	1	1	0	1	1	0	0	0	1	0	1	0	1	1	1	0	1	0	0	0	0	0	0	0	1	1	0	1	0	1	1	0	1	0	1	0	1	1	0	1	1	0	1	1	3
JHI-Hv50k-2016-67989	0	1	3	0	1	1	0	1	1	0	0	0	1	0	1	0	1	1	1	0	1	0	0	0	0	0	1	0	1	1	0	1	0	1	1	0	1	0	1	0	1	1	0	1	1	0	1	1	3
JHI-Hv50k-2016-68007	0	1	3	0	1	1	0	1	1	0	0	0	1	0	1	0	1	1	1	0	1	0	0	0	0	0	1	0	1	1	0	1	0	1	1	0	1	0	1	0	1	1	0	1	1	0	1	1	3
JHI-Hv50k-2016-68102	0	1	3	0	1	1	0	1	1	0	0	0	1	0	1	0	1	1	1	0	1	0	0	0	0	0	1	0	1	1	0	1	1	1	1	0	1	0	1	0	1	1	0	1	1	0	1	1	3
SCRI-RS-159158	0	1	3	0	1	1	0	1	1	0	0	0	1	0	0	0	1	1	1	0	1	0	0	0	0	0	1	0	1	1	0	1	1	1	1	0	1	0	1	0	1	1	0	1	1	0	1	1	1
JHI-Hv50k-2016-69930	0	1	0	0	1	1	0	1	3	0	0	0	1	0	0	0	1	1	1	0	1	0	0	0	0	0	1	0	1	1	0	1	1	1	1	0	1	0	1	0	1	1	0	1	1	0	1	1	0
SCRI-RS-106759	0	1	3	0	1	1	0	1	1	0	0	0	1	0	0	0	1	1	1	0	1	0	0	0	0	0	1	0	1	1	0	1	1	1	1	0	1	0	1	0	1	1	0	1	1	0	1	1	3
SCRI-RS-149462	0	1	3	0	1	1	0	1	1	0	0	0	1	0	0	0	1	1	1	0	1	0	0	0	0	0	1	0	1	1	0	1	1	1	1	0	1	0	1	0	1	1	0	1	1	0	1	1	3
JHI-Hv50k-2016-71117	0	1	3	0	1	1	0	1	1	0	0	0	1	0	0	0	1	1	1	0	1	0	0	0	0	0	1	0	1	1	0	1	1	1	1	0	1	0	1	0	1	1	0	1	1	0	1	1	3
JHI-Hv50k-2016-71174	0	1	3	0	1	1	0	1	1	0	0	0	1	0	0	0	1	1	0	0	1	0	0	0	0	0	1	0	1	1	0	1	1	1	1	0	1	0	1	0	1	1	0	1	1	0	1	1	3
SCRI-RS-66401	0	1	1	0	1	1	0	1	1	0	0	0	1	0	0	0	1	1	0	0	1	0	0	0	0	0	1	0	1	1	0	1	1	1	1	0	1	0	1	0	1	1	0	1	1	0	1	1	1
JHI-Hv50k-2016-71791	0	1	3	0	1	1	0	1	1	0	0	0	1	0	0	0	1	1	0	0	1	0	0	0	0	0	1	0	0	1	0	1	1	1	1	0	1	0	1	0	1	1	0	1	1	0	1	1	3
JHI-Hv50k-2016-71813	0	1	3	0	1	1	0	1	1	0	0	0	1	0	0	0	1	1	0	0	1	0	0	0	0	0	1	0	0	1	0	1	1	1	1	0	1	0	1	0	1	1	0	1	1	0	1	1	3
JHI-Hv50k-2016-71911	0	1	3	0	1	1	3	1	1	0	0	0	1	0	0	0	1	1	0	0	0	0	0	0	0	0	1	0	0	1	0	1	1	1	1	0	1	0	1	0	1	1	0	1	1	0	1	1	3
JHI-Hv50k-2016-72315	0	1	3	0	1	1	0	0	0	0	0	0	1	0	0	0	1	1	0	0	0	0	0	0	0	0	1	0	0	1	0	1	1	1	1	0	1	0	1	0	1	1	0	1	1	0	1	1	0
JHI-Hv50k-2016-72460	0	1	3	0	1	1	3	0	0	0	0	0	1	0	0	0	1	1	0	0	0	0	0	0	0	0	1	0	0	1	0	1	1	1	1	0	1	0	1	0	1	1	0	1	1	0	1	1	3
SCRI-RS-145190	0	1	3	0	1	1	0	0	0	0	0	0	1	0	0	0	1	1	0	0	0	0	0	0	0	0	1	0	0	1	0	1	1	1	1	0	1	0	1	0	1	1	0	0	1	0	1	1	3
JHI-Hv50k-2016-74372	0	1	3	0	1	1	1	0	0	1	0	0	1	0	0	0	1	1	0	0	0	0	0	0	0	0	0	0	0	1	0	1	1	1	1	0	1	0	1	0	1	1	0	0	1	0	1	1	1
SCRI-RS-188893	0	1	3	0	1	1	1	0	0	1	0	0	1	0	0	0	1	1	0	0	0	0	0	0	0	0	0	0	0	1	0	1	1	1	1	0	1	0	1	0	1	1	0	0	1	0	1	1	1
SCRI-RS-186448	0	1	3	0	1	1	1	0	0	1	0	0	1	0	0	0	1	1	0	0	0	0	0	0	0	0	0	0	0	1	0	1	1	1	1	0	1	0	1	0	1	1	0	0	1	0	0	1	1
JHI-Hv50k-2016-75243	0	1	3	0	1	1	1	0	0	1	0	0	1	1	0	0	1	1	0	0	0	0	0	0	0	0	0	0	0	1	0	1	1	1	1	0	1	0	1	0	1	1	0	0	1	0	0	1	1
SCRI-RS-192657	0	1	3	0	1	0	1	0	0	1	0	0	1	1	0	1	1	1	0	0	0	0	0	0	1	0	0	0	0	1	0	1	1	0	0	0	1	0	1	0	0	1	0	0	0	0	0	1	1
SCRI-RS-110647	0	1	3	0	1	0	1	0	0	1	0	0	1	1	0	1	1	1	0	0	0	0	0	0	1	0	0	0	0	1	0	1	1	0	0	0	1	0	1	0	0	1	0	0	0	0	0	1	1
BOPA1-5652-419	0	1	3	0	1	0	1	0	0	1	0	0	1	1	0	1	1	1	0	0	0	0	0	0	1	0	0	0	0	1	0	1	1	0	0	0	1	0	1	0	0	1	0	0	0	0	0	1	1
BOPA1-864-594	0	1	3	0	1	0	1	0	0	1	0	0	1	1	0	1	1	1	0	0	0	0	0	0	1	0	0	0	0	1	0	1	1	0	0	0	1	0	1	0	0	1	0	0	0	0	0	1	1
JHI-Hv50k-2016-76894	0	1	1	1	1	0	1	0	0	1	0	0	1	1	0	1	1	1	0	0	0	0	0	0	1	0	0	0	0	1	0	1	1	0	0	0	1	0	1	0	0	1	0	0	0	0	0	1	1
BOPA2-12-30748	0	1	1	1	1	0	1	0	0	1	0	0	1	1	0	1	1	1	0	0	0	0	0	0	1	0	0	0	0	1	0	1	1	0	0	0	1	0	1	0	0	1	0	0	0	0	0	1	1
JHI-Hv50k-2016-76931	0	1	1	1	1	1	1	0	0	1	0	0	1	1	0	1	1	1	0	0	0	0	0	0	1	0	0	0	0	1	0	1	1	0	0	0	1	0	1	0	0	1	0	0	0	0	0	1	1
JHI-Hv50k-2016-77166	0	1	1	1	1	1	1	0	0	1	0	0	1	1	0	1	1	1	0	0	0	0	0	0	1	0	0	0	0	1	0	1	1	0	0	0	1	0	1	0	0	1	0	0	0	0	0	1	1
SCRI-RS-215080	0	1	1	1	1	1	1	0	0	1	0	0	1	1	0	1	1	1	0	0	0	0	0	0	1	0	0	0	0	1	0	1	1	0	0	0	1	0	1	0	0	1	0	0	0	0	0	1	1
JHI-Hv50k-2016-77411	0	1	1	1	1	1	1	0	0	1	0	0	0	1	0	1	1	1	0	0	0	0	0	0	1	0	0	0	0	1	0	0	1	0	1	0	1	0	1	0	0	1	0	0	0	0	0	1	1
SCRI-RS-174935	0	1	1	1	1	1	1	1	0	1	0	0	0	1	0	1	1	1	0	0	0	0	0	0	1	0	0	0	0	1	0	0	1	0	1	0	1	0	1	0	0	1	0	0	0	0	0	1	1
SCRI-RS-89851	0	1	1	1	1	1	1	1	0	1	0	0	0	1	0	1	1	1	0	0	0	0	0	0	1	0	0	0	0	1	0	0	1	0	1	0	1	0	1	0	1	1	0	0	0	0	0	1	1
JHI-Hv50k-2016-78157	0	1	1	1	1	1	1	1	0	1	0	0	0	1	0	1	1	1	0	0	0	0	0	1	1	0	0	0	0	1	0	0	1	0	1	0	1	0	1	0	1	1	0	0	0	0	0	1	1
BOPA1-7623-818	0	1	1	1	1	1	1	1	0	1	0	0	0	1	0	1	1	1	0	0	0	0	0	1	1	0	0	0	0	1	0	0	1	0	1	0	1	0	1	0	1	1	0	0	0	0	0	1	1
BOPA1-2651-1774	0	1	1	1	1	1	1	1	0	1	0	1	0	1	0	1	1	1	0	0	0	0	0	1	1	0	0	0	0	1	0	0	1	0	1	0	1	0	1	0	1	1	0	0	0	0	0	1	1
JHI-Hv50k-2016-79433	0	1	1	1	1	1	1	1	0	1	0	1	0	1	0	1	1	1	0	0	0	0	0	1	1	0	0	0	0	1	0	0	1	0	1	0	1	0	1	0	1	1	0	0	0	0	0	0	1
JHI-Hv50k-2016-80336	0	1	1	1	1	1	1	1	0	1	0	1	0	1	0	1	1	1	1	0	0	0	0	1	1	0	0	0	0	1	0	0	1	0	1	0	1	0	1	0	1	1	0	0	0	0	0	0	1
SCRI-RS-152206	0	1	1	1	1	1	1	1	0	1	0	1	0	1	1	0	1	1	1	0	1	0	0	1	1	0	0	0	0	1	0	0	1	0	1	0	1	0	1	0	1	1	0	0	0	0	0	1	1
BOPA2-12-30703	0	1	1	1	1	1	1	1	0	1	0	1	0	0	1	0	1	1	1	0	1	0	0	1	1	0	0	0	0	1	0	0	1	0	1	0	1	0	1	0	1	1	0	0	0	0	0	1	1
JHI-Hv50k-2016-81297	0	1	1	1	1	1	1	1	0	1	0	1	0	0	1	0	1	1	1	0	1	0	0	1	1	0	0	0	0	1	1	0	1	0	1	0	1	0	1	0	1	1	0	0	0	0	0	1	1
JHI-Hv50k-2016-82074	0	1	1	1	1	1	1	1	0	1	0	1	0	0	1	0	1	1	1	0	1	0	0	1	1	0	0	0	0	1	1	0	1	0	1	0	1	0	1	0	1	1	0	0	0	0	0	1	1
JHI-Hv50k-2016-82292	0	1	0	0	1	0	0	1	0	0	0	0	0	1	1	0	1	1	1	1	1	0	0	1	0	1	0	1	0	0	1	1	1	0	1	1	1	0	0	1	0	1	1	1	1	1	1	1	0
SCRI-RS-126877	0	1	1	1	1	1	1	1	0	1	0	1	0	0	1	0	1	1	1	0	1	0	0	1	1	0	0	0	0	1	1	0	1	0	1	0	1	0	1	0	1	1	0	0	0	0	0	1	1
SCRI-RS-224846	0	1	1	1	1	1	1	1	0	1	0	1	0	0	1	0	1	1	1	0	1	0	0	1	1	0	0	0	0	1	1	0	1	0	1	0	1	0	1	0	1	1	0	0	0	0	0	1	1
JHI-Hv50k-2016-90439	0	1	1	1	1	1	1	1	0	1	0	1	0	0	1	0	1	1	1	0	1	0	0	1	1	0	0	0	0	1	1	0	1	0	1	0	1	0	1	0	1	1	0	0	0	0	0	0	1
SCRI-RS-151430	0	1	1	1	1	1	1	1	0	1	0	1	0	0	1	0	1	1	1	0	1	0	0	1	1	0	0	0	0	1	1	0	1	0	1	0	1	0	1	0	1	1	0	0	0	0	0	0	1
BOPA2-12-30042	0	1	1	1	1	1	1	1	0	1	0	0	0	0	1	0	1	1	1	0	1	0	0	1	1	0	0	0	0	1	1	0	1	0	1	0	1	1	1	0	1	1	0	0	0	0	0	0	1
JHI-Hv50k-2016-94898	0	1	1	1	1	1	1	1	0	1	0	0	0	0	0	0	1	1	1	0	1	0	0	1	1	0	0	0	0	1	1	0	1	0	1	0	1	1	1	0	1	1	0	0	0	0	0	0	1
BOPA1-7489-442	0	1	1	1	1	1	1	1	0	1	0	0	1	0	0	0	1	1	1	0	1	0	0	1	1	0	0	0	0	1	1	0	1	0	1	0	1	1	1	0	1	1	0	0	0	0	0	0	1
JHI-Hv50k-2016-98482	0	1	1	1	1	1	1	1	0	1	0	0	1	0	0	0	1	1	1	0	1	0	0	1	1	0	0	0	0	1	1	0	1	0	1	0	1	1	1	0	1	1	0	0	0	0	0	0	1
SCRI-RS-107754	0	1	1	1	1	1	1	1	0	1	0	0	1	0	1	0	1	1	1	0	1	0	1	1	1	0	0	0	0	1	1	0	1	0	1	0	1	1	1	0	1	1	0	0	0	0	0	0	1
SCRI-RS-143213	0	1	1	1	1	1	1	1	0	1	0	0	1	0	1	0	1	1	1	0	1	0	1	1	1	0	0	0	0	1	1	1	1	0	1	0	1	1	1	0	1	1	0	0	0	0	0	0	1
BOPA2-12-10545	0	1	1	1	1	1	1	1	0	1	0	0	1	0	1	0	1	1	1	0	1	0	1	1	1	0	0	0	0	1	1	1	1	0	1	0	1	1	1	0	1	1	0	0	0	0	0	0	1
SCRI-RS-202786	0	1	1	1	1	1	1	1	0	1	0	0	1	0	1	1	1	1	1	0	1	0	1	0	1	0	0	0	0	1	1	1	1	0	1	0	1	1	1	0	1	1	0	0	0	0	0	0	1
SCRI-RS-153531	0	1	1	1	1	1	1	1	0	1	0	0	1	0	1	1	1	1	1	0	1	0	1	0	1	0	0	0	0	1	1	1	1	0	1	0	1	1	1	0	1	1	0	0	0	0	0	0	1
SCRI-RS-212940	0	1	1	1	1	1	1	1	0	1	0	0	1	0	1	1	1	1	1	0	1	0	1	1	1	0	0	0	0	1	1	1	1	0	1	0	1	1	1	0	1	1	0	0	0	0	0	0	0
JHI-Hv50k-2016-100937	0	1	1	1	1	1	1	1	0	1	0	0	1	0	1	1	1	1	1	0	1	0	1	1	1	0	0	0	0	1	1	1	1	0	1	0	1	1	1	0	1	1	0	0	0	0	0	0	0
SCRI-RS-59851	0	1	1	1	1	1	1	1	0	1	0	0	1	0	1	1	1	1	1	0	1	0	1	1	1	0	0	0	0	1	1	1	1	0	1	0	1	1	1	0	1	1	0	0	0	0	0	0	0
JHI-Hv50k-2016-102303	0	1	1	1	3	1	1	1	0	1	0	0	1	0	1	1	1	1	1	0	1	0	1	1	1	0	0	0	0	1	1	1	1	0	1	0	1	1	1	0	1	1	0	0	0	0	0	0	0
SCRI-RS-16995	0	1	1	1	3	1	1	1	0	1	0	0	1	0	1	1	1	1	1	0	1	0	1	1	1	0	0	0	0	1	1	1	1	0	1	0	1	1	1	0	1	1	0	0	0	0	0	0	0
JHI-Hv50k-2016-103188	0	1	1	1	3	1	1	1	0	1	0	0	1	0	1	1	1	1	1	0	1	0	1	1	1	0	0	0	0	1	1	1	1	0	1	0	1	1	1	0	1	1	0	0	0	0	0	0	0
JHI-Hv50k-2016-103596	0	1	1	1	3	1	1	1	0	1	0	0	1	0	1	1	1	1	1	0	1	0	1	1	1	0	0	0	0	1	1	1	1	0	1	0	1	1	1	0	1	1	0	0	0	0	0	0	0
JHI-Hv50k-2016-103647	0	1	1	1	3	1	1	1	0	1	0	0	1	0	1	1	1	1	1	0	1	0	1	1	1	0	0	0	0	1	1	1	1	0	1	0	1	1	1	0	1	1	0	0	0	0	0	0	0
JHI-Hv50k-2016-103807	0	1	1	1	3	1	1	1	0	1	0	0	1	0	1	1	1	1	0	0	1	0	1	1	1	0	0	0	0	1	1	1	1	0	1	0	1	1	1	0	0	1	0	0	0	0	0	0	0
JHI-Hv50k-2016-103841	0	1	1	1	3	1	1	1	0	1	0	0	1	0	1	1	1	1	0	0	1	0	1	1	1	0	0	0	0	1	1	1	1	0	1	0	1	1	0	0	0	1	0	0	0	0	0	0	0
JHI-Hv50k-2016-104062	0	1	1	1	3	1	1	1	0	1	0	0	1	0	1	1	1	1	0	1	1	0	1	1	1	0	0	0	0	1	1	1	1	0	1	0	1	1	0	0	0	1	0	0	0	0	0	0	0
JHI-Hv50k-2016-104181	0	1	1	1	3	1	1	1	0	1	0	0	1	0	1	1	1	1	0	0	1	0	1	1	1	0	0	0	0	1	1	1	1	0	1	0	1	1	0	0	0	1	0	0	0	0	0	0	0
SCRI-RS-219568	0	1	1	1	3	1	1	1	0	1	0	0	1	0	1	1	1	1	0	0	1	0	1	1	1	0	0	0	0	1	1	1	1	0	1	0	1	1	0	0	0	1	0	0	0	0	0	0	0
JHI-Hv50k-2016-104514	0	1	1	1	0	1	1	1	0	1	0	0	1	0	1	1	1	1	0	0	1	0	1	1	1	0	0	0	0	1	1	1	1	0	1	0	1	1	0	0	0	1	0	0	0	0	0	0	0
JHI-Hv50k-2016-104808	0	1	1	1	3	1	1	1	0	1	0	0	1	0	1	1	1	1	0	0	1	0	1	1	1	0	0	0	0	1	1	1	1	0	1	0	1	1	0	0	0	1	0	0	0	0	0	0	0
SCRI-RS-17898	0	1	1	1	3	1	1	1	0	1	0	0	1	0	1	1	1	1	0	0	1	0	1	1	1	0	0	0	0	1	1	1	1	0	1	0	1	1	0	0	0	1	0	0	0	0	0	0	0
SCRI-RS-235874	0	1	1	1	3	1	1	1	0	1	0	0	1	0	1	1	1	1	0	0	1	0	1	1	1	0	0	0	0	1	1	1	1	0	1	0	1	1	0	0	0	1	0	0	0	0	0	0	0
JHI-Hv50k-2016-105719	0	1	1	1	3	1	1	1	0	1	0	0	1	1	1	1	1	1	0	0	1	0	1	1	1	0	0	0	0	1	1	1	1	0	1	0	1	1	0	0	0	1	0	0	0	0	0	0	0
SCRI-RS-158285	0	1	1	1	3	1	1	1	0	1	0	0	1	1	1	1	1	1	0	0	1	0	1	1	1	0	0	0	0	1	1	1	1	0	1	0	1	1	0	0	0	1	0	0	0	0	0	0	0
JHI-Hv50k-2016-106306	0	1	1	1	1	1	1	1	0	1	0	0	1	1	1	1	1	1	0	0	1	0	1	1	1	0	0	0	0	1	1	1	1	0	1	0	1	1	0	0	0	1	0	0	1	0	0	0	0
SCRI-RS-134812	0	1	1	1	1	1	1	1	0	1	0	0	1	1	1	1	1	1	0	0	1	0	1	1	1	0	0	0	0	1	1	1	1	0	1	0	1	1	0	0	0	1	0	0	1	0	0	0	0
SCRI-RS-235860	0	1	1	1	1	1	1	1	0	1	0	0	1	1	1	1	1	1	0	0	1	0	1	1	1	0	1	0	0	1	1	1	1	0	1	0	1	1	0	0	0	1	0	0	1	0	0	0	0
SCRI-RS-4930	0	1	1	1	1	1	1	1	0	1	0	0	1	1	1	1	1	1	0	0	1	0	1	1	1	0	1	0	0	1	1	1	1	0	1	0	1	1	0	0	0	1	0	0	1	0	0	0	0
JHI-Hv50k-2016-106887	0	1	1	1	1	1	1	1	0	1	0	0	1	1	1	1	1	1	0	0	1	0	1	1	1	0	1	0	0	1	1	1	1	0	1	0	1	1	0	0	0	1	0	0	1	0	0	0	0
SCRI-RS-154203	0	1	1	1	1	1	0	1	0	1	0	0	1	1	1	1	1	1	0	0	1	0	1	1	1	0	1	0	0	1	1	1	1	0	1	0	1	1	0	0	0	1	0	0	1	0	0	0	0
JHI-Hv50k-2016-107309	0	1	1	1	1	1	0	1	0	1	0	0	1	1	1	1	1	1	0	0	1	1	1	1	1	0	1	0	0	1	1	1	1	0	1	0	1	1	0	0	0	1	0	0	1	0	0	0	0
SCRI-RS-91810	0	1	1	1	1	1	0	1	0	1	0	0	1	1	1	1	1	0	0	0	1	1	1	1	1	0	1	0	0	1	1	1	1	0	1	0	1	1	0	0	0	1	0	0	1	0	0	0	0
SCRI-RS-88704	0	1	1	1	1	1	0	1	0	1	0	0	1	1	1	1	1	0	0	0	1	1	1	1	1	0	1	0	0	1	1	1	1	0	1	0	1	1	0	0	0	1	0	0	1	0	0	0	0
BOPA1-ConsensusGBS0705-1	0	1	1	1	1	1	0	1	0	1	0	0	1	1	1	1	1	0	0	0	1	1	1	1	1	0	1	0	0	1	1	1	1	0	1	0	1	1	0	0	0	1	0	0	1	0	0	0	0
JHI-Hv50k-2016-107997	0	1	1	1	1	1	0	1	0	1	0	0	1	1	1	1	1	0	0	0	1	1	1	1	1	0	1	0	0	1	1	1	1	0	1	0	1	1	0	0	0	1	0	0	1	0	0	0	0
JHI-Hv50k-2016-108103	0	1	1	1	1	1	0	1	0	1	0	0	1	1	1	1	1	0	0	0	1	1	1	1	1	0	1	0	0	1	1	1	1	0	1	0	1	1	0	0	0	1	0	0	1	0	0	0	0
SCRI-RS-211281	0	1	1	0	1	1	0	1	0	1	0	0	1	1	1	1	1	0	0	0	1	1	1	1	1	0	1	0	0	1	1	1	1	0	1	0	1	1	0	0	0	1	0	0	1	0	0	0	0
SCRI-RS-138463	0	1	1	0	1	1	0	1	0	1	0	0	1	1	1	1	1	0	0	0	1	1	1	1	1	0	1	0	0	1	1	1	1	0	1	0	1	1	0	0	0	1	0	0	1	0	0	0	0
JHI-Hv50k-2016-109308	0	1	1	0	1	1	0	1	0	1	0	0	1	1	1	1	1	0	0	0	1	1	1	1	1	0	1	0	0	1	1	1	1	0	1	0	1	1	0	0	0	1	0	0	1	0	0	0	0
BOPA1-6752-1013	0	1	1	0	1	1	0	1	0	1	0	0	1	1	1	1	1	0	0	0	1	1	1	0	1	0	1	0	0	1	1	1	1	0	1	0	1	1	0	0	0	1	0	0	1	0	0	0	0
JHI-Hv50k-2016-109395	0	1	1	0	1	1	0	1	0	1	0	0	1	1	1	1	1	0	0	0	1	1	1	0	1	0	1	0	0	1	1	1	1	0	1	0	1	1	0	0	0	1	0	0	1	0	0	0	0
JHI-Hv50k-2016-109460	0	1	1	0	1	1	0	1	0	1	0	0	1	1	1	1	1	0	0	0	1	1	1	0	1	0	1	0	0	1	1	1	1	3	0	0	1	1	0	0	0	1	0	0	1	0	0	0	0
JHI-Hv50k-2016-109473	0	1	1	1	1	1	0	1	0	1	0	0	1	1	1	1	1	0	0	0	1	1	1	0	1	0	1	0	0	1	1	1	1	3	0	0	1	1	0	0	0	1	0	0	1	0	0	0	0
BOPA1-2020-539	0	1	1	1	1	1	0	1	0	1	0	0	1	1	1	1	1	0	0	0	1	1	1	0	1	0	1	0	0	1	1	1	1	3	0	0	1	1	0	0	0	1	0	0	1	0	0	0	0
JHI-Hv50k-2016-109902	0	1	1	1	1	1	0	1	0	0	0	0	1	1	1	1	1	0	0	0	1	1	1	0	1	0	1	0	0	1	1	1	1	0	0	0	1	1	0	0	0	3	0	0	1	0	0	0	0
SCRI-RS-172220	0	1	1	1	1	1	0	1	0	0	0	0	1	1	1	1	1	0	0	0	1	1	1	0	1	0	1	0	0	1	1	1	1	0	1	0	3	1	0	0	0	1	0	0	1	0	0	0	0
SCRI-RS-160958	0	1	0	1	1	1	0	1	0	0	0	0	1	1	1	1	1	0	0	0	1	1	1	0	1	0	1	0	0	1	1	1	1	0	1	0	3	1	0	0	0	1	0	0	1	0	0	0	0
JHI-Hv50k-2016-112109	0	1	0	1	1	1	0	1	0	0	0	0	1	1	1	1	1	0	0	0	1	1	1	0	1	0	1	0	1	1	1	1	1	0	1	0	3	1	0	0	0	1	0	0	1	0	0	1	0
JHI-Hv50k-2016-112287	0	1	0	1	1	1	0	1	0	0	0	0	1	1	1	1	1	0	0	0	1	1	1	0	1	0	1	0	1	1	1	1	1	0	1	0	3	1	0	0	0	1	0	0	1	0	0	1	0
BOPA1-5347-585	0	1	0	1	1	1	0	1	0	0	0	0	1	1	1	1	1	0	0	0	1	1	1	0	1	0	1	0	1	1	1	1	1	0	1	0	3	1	0	0	0	1	0	0	1	0	0	1	0
SCRI-RS-4931	0	1	0	1	1	1	0	1	0	0	0	0	1	1	1	1	1	0	0	0	1	1	1	0	1	0	1	0	1	1	1	1	1	0	1	0	3	1	0	0	1	1	0	0	1	0	0	1	0
JHI-Hv50k-2016-113361	0	1	0	1	1	1	0	1	0	0	0	0	1	1	1	1	1	0	0	0	1	1	1	0	1	0	1	0	0	1	1	1	1	0	1	0	3	1	0	0	1	1	0	0	1	0	0	1	0
JHI-Hv50k-2016-113381	0	1	0	1	1	1	0	1	0	0	0	0	1	1	1	1	1	0	0	0	1	1	1	0	1	0	1	0	0	1	1	1	1	0	1	0	3	1	0	0	1	1	0	0	1	0	0	1	0
JHI-Hv50k-2016-113409	0	1	0	1	1	1	0	1	0	0	0	0	1	1	1	1	1	0	0	0	1	1	1	0	1	0	1	0	0	1	1	1	1	0	1	0	3	1	0	0	1	1	0	0	1	0	0	1	0
SCRI-RS-152485	0	1	0	1	1	1	0	1	0	0	0	0	1	1	1	1	0	0	0	0	1	1	1	0	1	0	1	0	0	1	1	1	1	0	1	0	3	1	0	0	1	1	0	0	1	0	0	1	0
BOPA1-7236-1384	0	1	0	1	1	1	0	1	0	0	0	0	1	1	1	1	0	0	0	0	1	1	1	0	1	0	1	0	0	1	1	1	1	0	1	0	3	1	0	0	0	1	0	0	1	0	0	1	0
SCRI-RS-157053	0	1	0	1	1	1	0	1	0	0	0	0	1	1	1	1	0	0	0	0	1	1	1	0	1	0	1	0	0	1	1	1	1	0	1	0	3	1	0	0	0	1	0	0	1	0	0	1	0
JHI-Hv50k-2016-113577	0	1	0	1	1	1	0	1	0	0	0	0	1	1	1	1	0	0	0	0	1	1	1	0	1	0	1	0	0	1	1	1	1	0	1	0	3	1	0	0	0	1	0	0	1	0	0	1	0
BOPA2-12-30480	0	1	0	1	1	1	0	0	0	0	0	0	1	1	1	1	0	0	0	0	1	1	1	0	1	0	1	0	0	1	1	1	1	0	1	0	3	1	0	0	0	1	0	0	1	0	0	1	0
JHI-Hv50k-2016-113735	0	1	0	1	1	1	0	0	0	0	0	0	1	1	1	1	0	0	0	0	1	1	1	0	1	0	1	0	0	1	1	1	1	0	1	0	3	1	0	0	0	1	0	0	1	0	0	1	0
JHI-Hv50k-2016-114156	0	1	0	1	0	1	0	0	0	0	0	0	1	1	1	1	0	0	0	0	1	1	1	0	1	0	1	0	0	1	1	1	1	0	1	0	1	1	0	0	0	1	1	1	1	0	0	0	3
JHI-Hv50k-2016-114240	0	1	0	1	0	1	0	0	0	0	0	0	1	1	1	1	0	0	0	0	1	1	1	0	1	0	1	0	0	1	1	1	1	0	1	0	1	1	0	1	0	1	1	1	1	0	0	0	3
JHI-Hv50k-2016-114879	0	1	0	1	0	1	0	0	0	0	0	0	1	1	1	1	0	0	0	0	1	1	1	0	1	0	1	0	0	1	1	1	1	0	1	0	1	0	0	1	0	1	1	1	1	0	0	0	3
JHI-Hv50k-2016-114861	0	1	0	1	0	1	0	0	0	0	0	0	1	1	1	1	0	0	0	0	1	1	1	0	1	0	1	0	0	1	1	1	1	0	1	0	1	0	0	1	0	1	1	1	1	0	0	0	3
BOPA2-12-30555	0	1	0	1	0	1	0	0	0	0	0	0	1	1	1	1	0	0	0	0	1	1	1	0	1	0	1	0	0	1	1	1	1	0	1	0	1	0	0	1	0	1	1	1	1	0	3	0	3
JHI-Hv50k-2016-115446	0	1	0	1	0	1	0	0	0	0	0	0	1	1	1	1	0	0	0	0	1	1	1	0	1	0	1	0	0	1	1	1	1	0	1	0	1	0	0	1	0	1	1	1	1	0	3	0	0
JHI-Hv50k-2016-115963	0	1	0	1	0	1	0	0	0	0	0	0	1	1	1	1	0	0	0	0	1	1	1	0	1	0	1	0	0	0	1	1	0	0	1	0	1	0	0	1	0	1	1	1	1	0	3	0	0
JHI-Hv50k-2016-118969	0	1	0	1	0	1	0	0	0	0	0	0	1	1	1	1	0	0	0	0	1	1	1	0	1	0	1	0	0	0	1	1	0	0	1	0	1	0	0	1	0	1	1	1	1	0	1	0	0
SCRI-RS-918	0	1	0	1	0	1	0	0	0	0	0	0	1	1	1	1	0	0	0	0	1	1	1	0	1	0	1	0	0	0	1	1	0	0	1	0	1	0	0	1	1	1	1	1	1	0	3	0	0
BOPA2-12-30459	0	1	0	1	0	1	0	0	0	0	0	0	1	1	1	1	0	0	0	0	1	1	1	0	1	1	1	0	0	0	1	1	0	0	1	0	1	0	0	1	1	1	1	1	1	0	3	0	0
JHI-Hv50k-2016-119678	0	1	0	1	0	1	0	0	0	0	0	0	1	1	1	1	0	0	0	0	1	1	1	0	1	1	1	0	0	0	1	1	0	0	1	0	1	0	0	1	1	1	1	1	1	0	1	0	0
SCRI-RS-223905	0	1	0	1	0	1	0	0	0	0	0	0	1	1	1	1	0	0	0	0	1	1	1	0	1	1	1	0	0	0	1	1	0	0	1	0	1	0	0	1	1	1	1	1	1	0	1	0	0
SCRI-RS-156220	0	1	0	1	0	1	0	0	0	0	0	0	1	1	1	1	0	0	0	0	1	1	1	0	1	1	1	0	0	0	1	1	0	0	1	0	1	0	0	1	1	1	1	1	1	0	1	0	0
SCRI-RS-238606	0	1	0	1	0	1	0	0	0	0	0	0	1	1	1	1	0	0	0	0	1	1	1	0	1	1	1	0	0	0	1	1	0	0	1	0	1	0	0	1	1	1	1	1	1	0	1	0	0
SCRI-RS-151349	0	1	0	1	0	1	0	0	0	0	0	0	1	1	1	1	0	0	0	0	1	1	1	0	1	1	1	0	1	0	1	1	0	0	1	0	1	0	0	1	1	1	1	1	1	0	1	0	0
SCRI-RS-610	0	1	0	1	0	1	0	0	0	0	0	0	1	1	1	1	0	0	0	0	1	0	1	0	1	1	1	0	1	0	1	1	0	0	1	0	1	0	0	1	1	1	1	1	1	0	1	0	0
SCRI-RS-206070	0	1	0	1	0	1	0	0	0	0	0	0	1	1	1	1	0	0	0	0	1	0	1	0	1	1	1	0	1	0	1	1	0	0	1	0	1	0	0	1	1	1	1	1	1	0	1	0	1
SCRI-RS-167694	0	1	1	1	0	1	0	0	0	0	0	0	1	1	1	1	0	0	0	0	1	0	1	0	1	1	1	0	1	0	1	1	0	0	1	0	1	0	0	1	1	1	1	1	1	0	1	0	1
JHI-Hv50k-2016-121422	0	1	1	1	0	1	0	0	0	0	0	0	1	1	1	1	0	0	0	0	1	0	1	0	1	1	1	0	1	0	1	1	0	0	1	0	1	0	0	1	1	1	1	1	1	0	1	0	1
SCRI-RS-205571	0	1	1	1	0	1	0	0	0	0	0	0	1	1	1	1	0	0	0	0	1	0	1	0	1	1	1	0	1	0	1	1	0	0	1	0	1	0	0	1	1	1	1	1	1	0	1	0	1
SCRI-RS-155689	0	1	1	1	0	1	0	0	0	0	0	0	1	1	1	1	0	0	0	0	1	0	1	0	1	1	1	0	1	0	1	0	0	0	1	0	1	0	0	1	1	1	1	1	1	0	1	0	1
SCRI-RS-235261	0	1	1	1	0	1	0	0	0	0	1	0	1	1	1	1	0	0	0	0	1	0	1	0	1	1	1	0	1	0	1	0	0	0	1	0	1	0	0	1	1	1	1	1	1	0	1	0	1
SCRI-RS-174214	0	1	1	1	0	1	0	0	0	0	1	0	1	1	1	1	0	0	0	0	1	0	1	0	1	1	1	0	1	0	1	0	0	0	1	0	1	0	0	1	1	1	1	1	1	0	1	0	1
SCRI-RS-224454	0	1	1	1	0	1	0	0	0	0	1	0	1	1	1	1	0	0	0	0	1	0	1	0	1	1	1	0	1	0	1	0	0	0	1	0	1	0	0	1	1	1	1	1	1	0	1	0	1
SCRI-RS-147052	0	1	1	1	0	1	0	0	0	0	1	0	1	1	1	1	0	0	0	0	1	0	1	0	1	1	1	0	1	0	1	0	0	0	1	0	1	0	0	1	1	1	1	1	1	0	1	0	1
JHI-Hv50k-2016-123949	0	1	1	1	0	1	0	0	1	0	1	0	1	1	1	1	0	0	0	0	1	0	1	0	1	1	1	0	1	0	1	0	0	0	1	0	1	0	0	1	1	1	1	1	1	0	1	0	1
SCRI-RS-151129	0	1	1	1	0	1	0	0	1	0	1	0	1	1	1	1	0	0	0	0	1	0	1	3	1	1	1	0	1	0	1	0	0	0	1	0	1	0	0	1	1	1	1	1	1	0	1	0	1
JHI-Hv50k-2016-124316	0	1	0	1	0	1	0	0	1	0	1	0	1	1	1	1	0	0	0	0	1	0	1	3	1	1	1	0	1	0	1	0	0	0	1	0	1	0	0	1	1	1	1	1	1	0	1	0	1
SCRI-RS-152659	0	1	0	1	0	1	0	0	1	0	1	0	1	1	1	1	0	0	0	0	1	0	1	3	1	1	1	0	1	0	1	0	0	0	1	0	1	0	0	1	1	1	1	1	1	0	1	0	1
SCRI-RS-218206	0	1	0	1	0	1	0	0	1	0	1	0	1	1	1	1	0	0	0	0	1	0	1	0	1	1	1	0	1	0	1	0	0	0	1	0	1	0	0	1	1	0	1	1	1	0	1	0	1
JHI-Hv50k-2016-125451	0	1	0	1	0	1	0	0	1	0	1	0	1	1	1	1	0	0	0	0	1	0	1	0	1	1	1	0	1	0	1	0	0	0	1	0	1	0	0	1	1	0	1	1	1	0	1	0	1
JHI-Hv50k-2016-125822	0	1	0	1	0	1	0	0	1	0	0	0	1	1	1	1	0	0	0	0	1	0	1	0	1	1	1	0	1	0	1	0	0	0	1	0	1	0	0	1	1	0	1	1	1	0	1	0	1
JHI-Hv50k-2016-126452	0	1	0	1	0	1	0	0	1	0	0	0	1	1	1	1	0	0	0	0	1	0	1	0	1	1	1	0	1	0	1	0	0	0	1	0	1	0	0	1	1	0	1	1	1	0	1	0	1
SCRI-RS-165373	0	1	0	1	0	1	0	0	1	0	0	0	1	0	1	1	0	0	0	0	1	0	1	0	1	1	1	0	1	0	1	0	0	0	1	0	1	0	0	1	1	0	1	1	1	0	1	0	1
BOPA1-6328-736	0	1	0	1	0	1	0	0	1	0	0	0	1	0	1	1	0	0	0	0	1	0	1	0	1	1	1	0	1	0	1	0	0	0	1	0	1	0	0	1	1	0	1	1	1	0	1	0	1
SCRI-RS-223119	0	1	0	1	0	1	0	0	1	0	0	0	0	0	1	1	0	0	0	0	1	0	1	0	1	1	1	0	1	0	1	0	0	0	1	0	1	0	0	1	1	0	1	1	1	0	1	0	1
SCRI-RS-157504	0	1	0	1	0	1	0	0	1	0	0	0	0	0	1	1	0	0	0	1	1	0	1	0	1	1	1	0	1	0	1	0	0	0	1	0	1	0	0	1	1	0	1	1	1	0	1	0	1
JHI-Hv50k-2016-127720	0	1	0	1	3	1	0	0	1	0	0	0	0	1	1	1	0	0	0	1	1	0	1	0	1	1	1	0	1	0	1	1	0	0	1	0	1	0	0	1	1	0	1	1	1	0	1	0	1
SCRI-RS-144102	0	1	0	1	3	1	0	0	1	0	0	0	0	1	0	1	0	0	0	1	1	0	1	0	1	1	1	0	1	0	1	1	0	0	1	0	1	0	0	1	1	0	1	1	1	0	1	0	1
JHI-Hv50k-2016-128068	0	1	0	1	3	1	0	0	1	0	0	0	0	1	0	1	0	0	0	1	1	0	1	0	1	1	1	0	1	0	1	1	0	0	1	0	1	0	0	1	1	0	1	1	0	0	1	0	1
JHI-Hv50k-2016-129045	0	1	0	1	3	1	0	0	1	0	0	0	0	1	0	1	0	0	3	1	1	0	1	0	1	1	1	0	1	0	1	1	0	0	1	0	1	0	0	1	1	0	1	1	0	0	1	0	1
JHI-Hv50k-2016-129603	0	1	0	1	3	1	0	0	1	0	0	0	0	1	0	1	0	0	3	1	1	0	1	0	1	1	1	0	1	0	1	1	0	0	1	0	1	0	0	1	1	0	1	1	0	0	1	0	1
SCRI-RS-221784	0	1	0	1	3	1	0	0	1	0	0	0	0	1	0	1	0	0	1	1	1	0	1	0	1	1	1	0	1	0	1	1	0	0	1	0	1	0	0	1	1	0	1	1	0	0	1	0	1
BOPA1-4241-445	0	1	0	1	3	1	0	0	1	0	0	0	0	1	0	1	0	0	1	1	1	0	1	0	1	1	1	0	0	0	1	1	0	0	1	0	1	0	0	1	1	0	1	1	0	0	1	0	1
SCRI-RS-215471	0	1	0	1	3	1	0	0	1	0	0	0	0	1	0	1	0	0	1	1	1	0	1	0	1	1	1	0	0	1	1	1	0	0	1	0	1	0	0	1	1	0	1	1	0	0	1	0	1
JHI-Hv50k-2016-131709	0	1	0	1	0	1	0	0	1	0	0	0	0	1	0	1	0	0	1	1	1	0	1	0	1	1	1	0	0	1	1	1	0	0	1	0	1	0	0	1	1	0	1	1	0	0	1	0	1
JHI-Hv50k-2016-132012	0	1	0	1	3	1	0	0	1	0	0	0	0	1	1	1	0	0	1	1	1	0	1	0	1	1	1	0	0	1	1	1	0	0	1	0	1	0	0	1	1	0	1	1	0	0	1	0	1
SCRI-RS-106163	0	1	0	1	3	1	0	0	1	0	0	0	0	1	1	1	0	0	1	1	1	0	1	0	1	1	1	0	0	1	1	1	0	0	1	0	1	0	0	1	1	0	1	1	0	0	1	0	1
SCRI-RS-148699	0	1	0	1	3	1	0	0	1	0	0	0	0	1	1	1	0	0	1	1	1	0	1	0	1	1	0	0	0	1	1	1	0	0	1	0	1	0	0	1	1	0	1	1	0	0	1	0	1
JHI-Hv50k-2016-132505	0	1	0	1	3	1	0	0	1	0	0	0	0	1	1	1	0	0	1	1	1	0	1	0	0	1	0	0	0	1	1	1	0	0	1	0	1	0	0	1	1	0	1	1	0	0	1	0	1
SCRI-RS-7219	0	1	0	1	0	1	0	0	1	0	0	0	0	1	1	1	0	0	1	1	1	0	1	0	0	1	0	0	0	1	1	1	0	0	1	0	1	0	0	1	1	0	1	1	0	0	1	0	1
JHI-Hv50k-2016-134401	0	1	0	1	3	1	0	0	1	0	0	0	0	1	0	1	0	0	1	1	1	0	1	0	0	1	0	0	0	1	1	1	0	0	1	0	1	0	0	1	1	0	1	1	0	0	1	0	1
JHI-Hv50k-2016-134491	0	1	0	1	3	1	0	0	1	0	0	0	0	1	0	1	0	0	1	1	1	0	1	0	0	1	0	0	0	1	1	1	0	0	1	0	1	0	0	1	1	0	1	1	0	0	1	0	1
JHI-Hv50k-2016-134802	0	1	0	1	3	1	0	0	1	0	0	0	0	1	0	1	0	0	1	1	1	0	1	0	0	1	0	0	0	1	1	1	0	0	1	0	1	0	0	1	1	0	1	1	0	0	1	0	1
JHI-Hv50k-2016-135047	0	1	0	1	3	1	0	0	1	0	0	0	0	1	0	1	0	0	1	1	1	0	1	0	0	1	0	0	0	1	1	1	0	0	1	0	1	0	0	1	1	0	1	1	0	0	1	0	1
JHI-Hv50k-2016-135056	0	1	0	1	3	1	0	0	1	0	0	0	0	1	0	1	0	0	1	1	1	0	1	0	0	1	0	0	0	1	1	1	0	0	1	0	1	0	0	1	1	0	1	1	0	0	1	0	1
JHI-Hv50k-2016-135189	0	1	0	1	3	1	0	0	1	0	0	1	0	1	0	1	0	0	1	1	1	0	1	0	0	1	0	0	0	1	1	1	0	0	1	0	1	0	0	1	1	0	1	1	0	0	1	0	1
JHI-Hv50k-2016-135316	0	1	0	1	3	0	0	0	1	0	0	1	0	1	0	1	0	0	1	1	1	0	1	0	0	1	0	0	0	1	1	1	0	0	1	0	1	0	0	1	1	0	1	1	0	0	1	0	1
BOPA2-12-10447	0	1	0	1	3	0	0	0	1	0	0	1	0	1	0	1	0	0	1	1	1	0	1	0	0	1	0	0	0	1	1	1	0	0	1	0	1	0	0	1	1	0	1	1	0	0	1	0	1
BOPA2-12-11368	0	1	0	1	3	0	0	0	1	0	0	1	0	1	0	1	0	0	1	1	1	0	1	0	0	0	0	0	0	1	1	1	0	0	1	0	1	0	0	1	1	0	1	1	0	0	1	0	1
SCRI-RS-161636	0	1	0	1	3	0	0	0	1	0	0	1	0	1	0	1	0	0	1	1	1	0	1	0	0	0	1	0	0	1	1	1	0	0	1	0	1	0	0	1	1	0	1	1	0	0	1	0	1
JHI-Hv50k-2016-137252	0	1	0	1	3	0	0	0	0	0	0	0	0	1	0	1	0	0	1	1	1	0	1	0	0	0	1	0	0	1	1	1	0	0	1	0	1	0	0	1	1	0	1	1	0	0	1	0	1
BOPA1-2052-792	0	1	0	1	3	0	0	0	0	0	0	0	0	1	0	1	0	0	1	1	1	0	1	0	0	0	1	0	0	1	1	1	0	0	1	0	1	0	0	1	1	0	1	1	0	0	1	0	1
SCRI-RS-156819	0	1	0	1	0	0	0	1	0	0	0	0	0	1	0	1	0	0	1	1	1	0	1	0	0	0	1	0	0	1	1	1	0	0	1	0	1	0	1	1	1	0	1	1	0	0	1	0	1
SCRI-RS-153293	0	1	0	1	3	1	0	1	0	0	0	1	0	1	0	1	1	1	1	1	1	0	1	0	0	0	1	0	0	1	1	1	1	0	1	0	1	1	1	1	1	0	0	1	0	1	1	0	1
JHI-Hv50k-2016-139165	0	1	0	1	3	1	0	1	0	0	0	1	0	1	0	1	1	1	1	1	1	0	1	0	0	0	1	0	0	1	1	1	1	0	1	0	1	1	1	1	1	0	0	1	0	1	1	0	1
SCRI-RS-149233	0	1	0	1	3	1	0	1	0	0	0	1	0	1	0	1	1	1	1	1	1	0	1	0	0	0	1	0	0	1	1	1	1	0	1	0	1	1	1	1	1	0	0	1	0	1	1	0	1
SCRI-RS-174051	0	1	0	1	3	1	0	1	0	0	0	1	0	1	0	1	1	1	1	1	1	0	1	0	0	0	1	0	0	1	1	1	1	0	1	0	1	1	1	1	1	0	0	1	0	1	1	0	1
SCRI-RS-172136	0	1	0	1	3	1	0	1	0	0	0	1	0	1	0	1	1	1	1	1	1	0	1	0	0	0	1	0	0	1	1	1	1	0	1	0	1	1	1	1	1	0	0	1	0	0	1	0	1
SCRI-RS-73620	0	1	0	1	3	1	0	1	0	0	0	1	0	1	0	1	1	1	1	1	1	0	1	0	0	0	1	0	0	1	1	1	1	0	1	0	1	1	1	1	1	0	0	1	0	0	1	0	1
SCRI-RS-119848	0	1	0	1	1	1	0	1	0	0	0	1	0	1	0	1	1	1	1	1	1	0	1	0	0	0	1	0	0	1	1	1	1	0	1	0	1	1	1	1	1	0	0	1	0	0	1	0	1
JHI-Hv50k-2016-142124	0	1	0	1	1	1	0	1	0	0	0	1	0	1	0	1	1	1	1	1	1	0	1	0	0	0	1	0	0	1	1	1	1	0	1	1	1	1	1	1	1	0	0	1	0	0	1	0	1
SCRI-RS-169956	0	1	0	1	1	1	0	1	0	0	0	1	0	1	0	1	1	1	1	1	1	0	1	0	0	1	1	0	0	1	1	1	1	0	1	1	1	1	1	1	1	0	0	1	1	0	1	0	1
BOPA1-1344-930	0	1	0	1	1	1	0	1	0	0	0	1	0	1	0	1	1	1	1	1	1	0	1	0	0	1	1	0	1	1	1	1	1	0	1	1	1	1	1	1	1	0	0	1	1	0	1	0	1
SCRI-RS-204579	0	1	0	1	1	1	0	1	0	0	0	1	0	1	0	1	1	1	1	1	1	0	1	0	0	1	1	0	1	1	1	1	1	0	1	1	1	1	1	1	1	0	0	1	1	0	1	0	1
JHI-Hv50k-2016-145032	0	1	0	1	1	1	0	1	0	0	0	1	0	1	0	0	1	1	1	1	1	0	1	0	0	1	1	0	1	1	1	1	1	0	1	1	1	1	1	1	1	0	0	1	1	0	1	0	1
SCRI-RS-186760	0	1	0	1	1	1	0	1	0	0	0	1	0	1	0	0	1	1	1	1	1	0	1	0	0	1	1	0	1	1	1	1	1	0	1	1	1	1	1	1	1	0	0	1	1	0	1	0	1
JHI-Hv50k-2016-146031	0	1	0	1	1	1	0	0	0	0	0	1	0	1	0	0	1	1	1	1	1	0	1	0	0	1	1	0	1	1	1	1	1	0	1	1	1	1	1	1	1	0	0	1	1	0	1	0	1
JHI-Hv50k-2016-149269	0	1	0	0	0	0	1	1	1	0	1	1	1	0	1	0	0	1	0	3	1	0	1	0	0	0	1	1	0	0	1	0	0	1	0	0	0	0	1	1	0	0	0	0	0	1	1	0	0
JHI-Hv50k-2016-149680	0	1	0	0	0	0	1	1	1	0	1	1	1	0	1	0	0	1	0	3	1	0	1	0	0	0	1	1	0	0	1	0	0	1	0	0	0	0	1	1	0	0	0	0	0	1	1	0	0
JHI-Hv50k-2016-150357	0	1	0	0	0	0	1	1	1	0	1	1	1	0	1	0	0	1	0	3	1	0	1	0	0	0	1	1	0	0	1	0	0	1	0	0	0	0	1	1	0	0	0	0	0	1	1	0	0
JHI-Hv50k-2016-150970	0	1	0	0	0	0	1	1	1	0	1	1	1	0	1	0	0	1	0	3	1	0	1	0	0	0	1	1	0	0	1	0	0	1	0	0	3	0	1	1	0	0	0	0	0	1	1	0	0
JHI-Hv50k-2016-151846	0	1	0	0	0	0	1	1	1	0	1	1	1	0	1	0	0	1	0	3	1	0	1	0	0	0	1	1	0	0	1	0	0	1	0	0	3	0	1	1	0	0	0	0	0	1	1	0	1
JHI-Hv50k-2016-152075	0	1	0	0	0	0	1	1	1	0	1	1	1	0	1	0	0	1	0	3	1	0	1	0	0	0	1	1	0	0	1	0	0	1	0	0	3	0	1	1	0	0	0	0	0	1	1	0	1
JHI-Hv50k-2016-152723	0	1	0	0	0	0	1	1	1	0	1	1	1	0	1	0	0	1	0	3	1	0	1	0	0	0	1	1	0	0	1	0	0	1	0	0	1	0	1	1	0	0	0	0	0	1	1	0	1
JHI-Hv50k-2016-152968	0	1	0	0	0	0	1	1	1	0	1	1	1	0	1	0	0	1	0	1	1	0	1	0	0	0	1	1	0	0	1	0	0	1	0	0	1	0	1	1	0	0	0	0	0	1	1	0	0
BOPA2-12-30297	0	1	0	0	0	0	1	1	1	0	1	1	1	0	1	0	0	1	0	1	1	0	1	0	0	0	1	1	0	0	1	0	0	1	0	0	1	1	1	1	0	0	0	0	0	1	1	0	0
SCRI-RS-6682	0	1	0	0	0	0	1	1	1	0	1	1	1	0	1	0	0	1	0	1	1	0	1	0	0	0	1	1	0	0	1	0	0	1	0	0	1	1	1	1	0	0	0	0	0	1	1	0	0
JHI-Hv50k-2016-153137	0	1	0	0	0	0	1	1	1	0	1	1	1	0	1	0	0	1	0	1	1	0	1	0	0	0	1	1	0	0	1	0	0	1	0	0	1	1	1	1	0	0	0	0	0	1	1	0	0
JHI-Hv50k-2016-153623	0	1	0	0	0	0	1	1	1	0	1	1	1	0	1	0	0	1	0	1	1	0	1	0	0	0	1	1	0	0	0	0	0	1	0	0	1	1	1	1	0	0	0	0	0	1	1	0	0
JHI-Hv50k-2016-153756	0	1	0	0	0	0	1	1	1	0	1	1	1	0	1	0	0	1	0	1	1	0	1	0	0	0	1	1	0	0	0	0	0	1	0	0	1	1	1	1	0	0	0	0	0	1	0	0	0
JHI-Hv50k-2016-153862	0	1	0	0	0	0	1	1	1	0	1	1	1	0	1	0	0	1	0	1	1	0	1	0	0	0	1	1	0	0	0	0	0	1	0	0	1	1	1	1	0	0	0	0	0	1	0	0	0
JHI-Hv50k-2016-154092	0	1	0	0	0	0	1	1	1	0	1	1	1	0	1	0	0	1	0	1	1	0	1	0	0	0	1	1	0	0	0	0	0	1	0	0	1	1	1	1	0	0	0	0	0	1	0	0	0
JHI-Hv50k-2016-154122	0	1	0	0	0	0	1	1	1	0	1	1	1	0	1	0	0	1	0	1	1	0	1	0	0	0	1	1	0	0	0	0	0	1	0	0	1	1	1	1	0	0	0	0	0	1	0	0	0
JHI-Hv50k-2016-154553	0	1	0	0	0	0	1	1	1	0	1	1	1	0	1	0	0	1	0	1	1	0	1	0	0	0	1	1	0	0	0	0	0	1	1	0	1	1	1	1	0	0	0	0	0	1	0	0	0
JHI-Hv50k-2016-154725	0	1	0	0	0	0	1	1	1	0	1	1	1	0	1	0	0	1	0	1	1	0	1	0	0	0	1	1	0	0	1	0	0	1	1	0	1	1	1	1	0	0	0	0	0	1	0	0	0
JHI-Hv50k-2016-154830	0	1	0	0	0	0	1	1	1	0	1	1	1	0	1	0	0	1	0	1	1	0	1	0	0	0	1	1	0	0	1	0	0	1	1	0	1	1	1	1	0	0	0	0	0	1	0	0	0
JHI-Hv50k-2016-155002	0	1	0	0	0	0	1	1	1	0	1	1	1	0	1	0	0	1	0	1	1	0	1	0	0	0	1	1	0	0	1	0	0	1	1	0	1	1	1	1	0	0	0	0	0	1	0	0	0
JHI-Hv50k-2016-155191	0	1	0	0	0	0	1	1	1	0	1	1	1	0	1	0	0	1	0	1	1	0	1	0	0	0	1	1	0	0	1	0	0	1	1	0	1	1	1	1	0	0	0	0	0	1	0	0	0
JHI-Hv50k-2016-155465	0	1	0	0	0	0	1	1	1	0	0	1	1	0	1	0	0	1	0	1	1	0	1	0	0	0	1	1	0	0	1	0	0	1	1	0	1	1	1	1	0	0	0	0	0	1	0	0	0
JHI-Hv50k-2016-155489	0	1	0	0	0	0	1	1	1	0	0	1	1	0	1	0	0	1	0	1	1	0	1	0	0	0	1	1	0	0	1	0	0	1	1	0	1	1	1	1	0	0	0	0	0	1	0	0	0
JHI-Hv50k-2016-155518	0	1	0	0	0	0	1	1	1	0	0	1	1	0	1	0	0	1	0	1	1	0	1	0	0	0	1	1	0	0	1	0	0	1	1	0	1	1	1	1	0	0	0	0	0	1	0	0	0
JHI-Hv50k-2016-155753	0	1	0	0	0	0	0	1	1	0	0	1	1	0	1	0	0	1	1	1	1	0	1	0	0	0	1	1	0	0	1	0	0	1	1	0	1	1	1	1	0	0	0	0	0	1	0	0	0
JHI-Hv50k-2016-155784	0	1	0	0	0	0	0	1	0	0	0	1	1	0	1	0	0	1	1	1	1	0	1	0	0	0	1	1	0	0	1	0	0	1	1	0	1	1	1	1	0	0	0	0	0	1	0	0	0
JHI-Hv50k-2016-155973	0	1	0	0	0	0	0	1	0	0	0	1	1	0	1	0	0	1	1	1	1	0	1	0	0	0	1	1	0	0	1	0	0	1	1	0	1	1	1	1	0	0	0	0	0	1	0	0	0
JHI-Hv50k-2016-156361	0	1	0	0	0	0	0	1	0	0	0	1	1	0	1	0	0	1	1	1	1	0	1	0	0	0	1	1	0	0	1	0	0	1	1	0	1	1	1	1	0	0	0	0	0	1	0	0	0
JHI-Hv50k-2016-156563	0	1	0	0	0	0	0	1	0	0	0	1	1	0	1	0	0	1	1	1	1	0	1	0	0	0	1	1	0	0	1	0	0	1	1	0	1	1	1	1	0	0	1	0	1	1	0	0	0
JHI-Hv50k-2016-156577	0	1	0	0	0	0	0	1	0	0	0	0	1	0	1	0	0	1	1	1	1	0	1	0	0	0	1	1	0	0	1	0	0	1	1	0	1	1	1	1	0	0	1	0	1	1	0	0	0
JHI-Hv50k-2016-156603	0	1	0	0	0	0	0	1	0	0	0	1	1	0	1	0	0	1	1	1	1	0	1	0	0	0	1	1	0	0	1	0	3	1	1	0	1	1	1	0	0	0	1	0	1	1	0	0	0
JHI-Hv50k-2016-156624	0	1	0	0	0	0	0	1	0	0	0	1	1	0	1	0	0	1	1	1	1	0	1	0	0	0	1	1	0	0	1	0	3	1	1	0	1	1	1	1	0	0	1	0	1	1	0	0	0
JHI-Hv50k-2016-156676	0	1	0	0	0	0	0	1	0	0	0	1	1	0	1	0	0	1	1	1	1	0	1	0	0	0	1	1	0	0	1	0	3	1	1	0	1	1	1	1	0	0	1	0	1	1	0	0	0
JHI-Hv50k-2016-156788	0	1	0	0	0	0	0	1	0	0	0	1	1	0	1	0	0	1	1	1	1	0	1	0	0	0	1	1	0	0	1	0	3	1	1	0	1	1	1	0	0	0	1	0	1	1	0	0	0
JHI-Hv50k-2016-157074	0	1	0	0	0	0	0	1	0	0	0	1	1	0	1	0	0	1	1	1	1	0	1	0	0	0	1	1	0	0	1	0	1	1	1	0	1	1	1	0	0	0	1	0	1	1	0	0	0
JHI-Hv50k-2016-157411	0	1	0	0	0	0	0	1	0	0	0	1	1	0	0	0	0	1	1	1	1	0	1	0	0	0	1	1	0	0	1	0	1	1	1	0	1	1	1	0	0	0	1	0	1	1	0	3	0
JHI-Hv50k-2016-158166	0	1	0	0	0	0	0	1	0	0	0	1	1	0	0	0	0	1	1	1	1	0	1	0	0	0	1	1	0	0	1	0	1	1	1	0	1	1	1	0	0	0	1	0	1	1	0	3	0
JHI-Hv50k-2016-158676	0	1	0	0	0	0	0	1	0	0	0	1	1	0	0	0	0	1	1	1	1	0	1	0	0	0	1	1	0	0	1	0	1	1	1	1	1	1	0	0	0	0	1	0	1	1	0	1	0
SCRI-RS-229894	0	1	0	0	0	0	0	1	0	0	0	1	1	0	0	1	0	1	1	1	1	0	1	0	0	0	1	1	0	0	1	0	1	1	1	1	1	1	0	0	0	0	1	0	1	1	0	1	0
JHI-Hv50k-2016-158891	0	1	0	0	0	0	0	1	0	1	0	1	1	0	0	1	0	1	1	1	1	0	1	0	0	0	1	1	0	1	1	0	1	1	1	1	1	1	0	0	0	0	1	0	1	1	0	1	0
JHI-Hv50k-2016-159041	0	1	0	0	0	0	0	1	0	1	0	1	1	0	0	1	0	1	1	1	1	0	1	0	0	0	1	1	0	0	1	0	1	1	1	1	1	1	0	0	0	0	1	0	1	1	0	1	0
JHI-Hv50k-2016-159219	0	1	0	0	0	0	0	1	0	1	0	1	1	0	0	1	0	1	1	1	1	0	1	0	0	0	1	1	0	1	1	0	1	1	1	1	1	1	0	0	0	0	1	0	0	1	0	1	0
JHI-Hv50k-2016-159636	0	1	0	0	0	0	0	1	0	1	0	1	1	0	0	1	0	1	1	1	1	0	1	0	0	0	1	1	0	1	1	0	1	1	3	1	1	1	0	0	0	0	1	0	0	1	0	1	0
JHI-Hv50k-2016-159793	0	1	0	0	0	0	0	1	0	1	0	1	1	0	0	1	0	1	1	1	1	0	1	0	0	0	1	1	0	1	1	0	1	1	3	1	1	1	0	0	0	0	1	0	0	1	0	3	0
JHI-Hv50k-2016-160053	0	1	0	0	0	0	0	1	0	1	0	1	1	0	0	1	0	1	1	1	1	0	1	0	0	0	1	1	0	1	1	0	1	1	3	1	1	1	0	0	0	0	1	0	0	1	0	1	0
JHI-Hv50k-2016-160251	0	1	0	0	0	0	0	1	0	1	0	1	1	0	0	1	1	1	1	1	1	0	1	0	0	0	1	1	0	1	1	0	1	1	3	1	1	1	0	0	0	1	1	0	0	1	0	1	0
JHI-Hv50k-2016-160274	0	1	0	0	0	0	0	1	0	1	0	1	1	0	0	0	1	1	1	1	1	0	1	0	0	0	1	1	0	1	1	0	1	1	3	1	1	1	0	0	0	1	1	0	0	1	0	1	0
JHI-Hv50k-2016-160353	0	1	0	0	0	0	0	1	0	1	0	1	1	0	0	0	1	1	1	1	1	0	1	0	0	0	1	1	0	1	1	0	1	1	3	1	1	1	0	0	0	1	1	0	0	1	0	1	0
JHI-Hv50k-2016-160470	0	1	0	0	0	0	0	1	0	0	0	1	1	0	0	0	1	1	1	1	1	0	1	0	0	0	1	1	0	1	1	0	1	1	3	1	1	1	0	0	0	1	1	0	0	1	0	1	0
JHI-Hv50k-2016-160544	0	1	0	1	0	0	0	1	0	0	0	1	1	0	0	0	1	1	1	1	1	0	1	0	0	0	1	1	0	1	1	0	1	1	3	1	0	1	0	0	0	1	1	0	0	1	0	1	0
BOPA2-12-30571	0	1	0	1	0	0	0	1	0	0	1	1	1	0	0	0	1	1	1	1	1	1	1	0	0	0	1	1	0	1	1	0	1	1	3	1	0	1	0	0	0	1	1	0	0	1	0	1	0
JHI-Hv50k-2016-161122	0	1	0	1	0	0	0	1	0	0	1	1	1	0	0	0	1	1	1	1	1	1	1	0	1	1	1	1	0	1	1	0	1	1	3	1	0	1	0	0	0	1	1	0	0	1	0	1	0
JHI-Hv50k-2016-161228	0	1	0	1	0	0	0	1	0	0	1	1	1	0	0	0	1	1	1	1	1	1	1	0	1	1	1	1	0	1	1	0	1	1	3	1	0	3	0	0	0	1	1	0	0	1	0	1	0
SCRI-RS-230486	0	1	0	1	0	0	0	1	0	0	1	1	1	0	0	0	1	1	1	1	1	1	1	0	1	1	1	0	0	1	1	0	1	1	3	1	0	3	0	0	0	1	1	0	0	1	0	1	0
JHI-Hv50k-2016-161480	0	1	0	1	0	0	0	1	0	0	1	1	1	0	0	0	1	1	1	1	1	1	1	0	1	1	1	0	0	1	1	0	1	1	3	1	0	3	0	0	0	1	1	0	0	1	0	1	0
JHI-Hv50k-2016-162277	0	1	0	1	0	0	0	1	0	0	1	1	1	0	0	0	1	1	1	1	0	1	1	0	1	1	1	0	0	1	1	0	1	1	3	1	0	3	0	0	0	1	1	0	0	1	0	1	0
JHI-Hv50k-2016-162483	0	1	0	1	0	0	0	1	0	0	1	1	1	0	0	0	1	1	1	0	0	1	1	0	1	1	1	0	0	1	1	0	1	1	3	1	0	3	0	0	0	1	1	0	0	1	0	1	0
BOPA2-12-31298	0	1	0	1	0	0	0	1	0	0	1	1	1	0	0	0	1	1	1	0	0	1	1	0	1	1	1	0	0	1	1	0	1	1	3	1	0	3	0	0	0	1	1	0	0	1	0	1	0
JHI-Hv50k-2016-163473	0	1	0	1	0	0	0	1	0	0	1	1	1	0	0	0	1	1	1	0	0	1	1	0	1	1	1	0	0	1	1	0	1	1	3	1	0	3	0	0	0	1	1	0	0	1	0	1	0
JHI-Hv50k-2016-163506	0	1	0	1	0	0	0	1	0	0	1	1	1	0	0	0	1	1	1	0	0	1	1	0	1	1	1	0	0	1	1	0	1	1	3	1	0	3	0	0	0	1	1	0	0	1	0	1	0
JHI-Hv50k-2016-163961	0	1	0	1	0	0	0	1	0	0	1	1	1	0	0	0	1	1	1	0	0	1	1	0	1	1	1	0	0	1	1	0	1	1	3	1	0	3	0	0	0	1	1	0	0	1	0	1	0
JHI-Hv50k-2016-164106	0	1	0	1	0	0	0	1	0	0	1	1	1	0	0	0	1	1	1	0	0	1	1	0	1	1	1	0	0	1	1	0	1	1	3	1	0	3	0	0	0	1	1	0	1	1	0	1	0
JHI-Hv50k-2016-164244	0	1	0	1	0	0	0	1	0	0	1	1	1	0	0	0	1	1	1	0	0	1	1	0	1	1	0	0	0	1	1	0	1	1	3	1	0	3	0	0	0	1	1	1	1	1	0	1	0
JHI-Hv50k-2016-164271	0	1	0	1	0	0	0	1	0	0	1	1	1	0	0	0	1	1	1	0	0	1	1	0	1	1	0	0	0	1	1	0	1	1	3	1	0	3	0	0	0	0	1	1	1	1	0	1	0
JHI-Hv50k-2016-164364	0	1	0	1	0	0	0	0	0	0	0	1	1	0	0	0	1	1	1	0	0	1	1	3	1	1	0	0	0	1	1	0	1	1	3	1	0	3	0	0	0	0	1	1	1	1	0	1	0
SCRI-RS-146425	0	1	0	1	0	0	0	0	0	0	0	1	1	0	0	0	1	1	1	0	0	1	1	3	1	1	0	0	0	1	1	0	1	1	1	1	0	3	0	0	0	0	1	1	1	1	0	1	0
BOPA1-9018-522	0	1	0	1	0	0	0	0	0	0	0	1	1	0	0	0	1	1	1	0	0	1	1	3	1	1	0	0	0	1	1	0	1	1	1	1	0	3	0	0	0	0	1	1	1	1	0	1	0
JHI-Hv50k-2016-164401	0	1	0	1	0	0	0	0	0	0	0	1	1	0	0	0	1	1	1	0	0	1	1	3	1	1	0	0	0	1	1	0	1	1	1	1	0	1	0	0	0	0	1	1	1	1	0	1	0
JHI-Hv50k-2016-164656	0	1	0	1	0	0	0	0	0	0	0	1	1	0	0	0	1	1	1	0	0	1	1	3	1	1	0	0	0	1	1	0	1	1	1	1	0	1	0	0	0	0	1	1	1	1	0	1	0
JHI-Hv50k-2016-164706	0	1	0	1	0	0	0	0	0	0	0	1	1	0	0	0	1	1	1	0	0	1	1	3	1	1	0	0	0	1	1	0	1	1	1	1	0	1	0	0	0	0	1	1	1	1	0	1	0
JHI-Hv50k-2016-164728	0	1	0	1	0	0	0	0	0	0	0	1	1	0	0	0	1	0	1	0	0	1	1	3	1	1	0	0	0	1	1	0	1	1	1	1	0	1	3	0	0	0	1	1	1	1	0	1	0
JHI-Hv50k-2016-164734	0	1	0	1	0	0	0	0	0	0	0	1	1	0	0	0	1	0	1	0	0	1	1	3	1	1	0	0	0	1	1	1	1	1	1	1	0	1	3	0	0	0	1	1	1	1	0	1	0
JHI-Hv50k-2016-164834	0	1	0	1	0	0	0	0	0	0	0	1	1	0	0	0	1	0	1	0	0	1	1	3	1	1	0	0	0	1	1	1	1	0	1	1	0	1	3	0	0	0	1	1	1	1	0	1	0
JHI-Hv50k-2016-165978	0	1	0	1	0	0	0	0	0	0	0	1	1	0	0	0	1	0	1	0	0	1	1	1	1	1	0	0	0	1	1	1	1	0	1	1	0	1	3	0	0	0	1	1	1	1	0	1	0
BOPA2-12-30467	0	1	0	1	0	0	0	0	0	0	0	1	1	0	0	0	1	0	1	0	1	1	1	1	1	1	0	0	0	1	1	1	1	0	1	1	0	1	3	0	0	0	1	1	1	1	0	1	0
JHI-Hv50k-2016-166356	0	1	0	1	0	0	0	0	0	0	0	1	1	0	0	0	1	0	1	0	1	1	1	1	1	1	0	0	0	1	1	1	1	0	1	1	0	1	3	0	0	0	1	1	1	1	0	1	0
JHI-Hv50k-2016-167001	0	1	0	1	0	0	0	0	0	0	0	1	1	0	0	0	1	0	1	0	1	1	1	1	1	1	0	0	0	1	0	1	1	0	1	1	0	1	1	0	0	0	1	1	1	1	0	1	0
JHI-Hv50k-2016-167734	0	1	0	1	0	0	0	0	0	0	0	1	1	0	0	0	1	0	1	0	1	1	1	1	1	1	0	0	0	1	0	1	1	0	1	1	0	1	3	0	0	0	1	1	1	1	0	1	0
BOPA2-12-31011	0	1	0	1	0	0	0	0	0	0	0	1	1	0	0	0	1	0	1	0	1	1	1	1	1	1	0	0	0	1	0	1	1	0	1	1	0	1	0	0	0	0	1	1	1	1	0	1	0
JHI-Hv50k-2016-183072	0	1	0	1	0	0	0	0	0	0	1	1	1	0	0	0	1	0	1	0	1	1	1	1	1	1	0	0	0	1	0	1	1	0	1	1	0	1	3	0	0	0	1	1	1	1	0	1	0
SCRI-RS-221644	0	1	0	1	0	0	0	0	0	0	1	1	1	0	0	0	1	0	1	0	1	1	1	1	1	1	0	0	0	1	0	1	1	0	1	1	1	1	3	0	0	0	1	1	1	1	0	1	0
JHI-Hv50k-2016-183207	0	1	0	1	0	0	0	0	0	0	1	1	1	0	0	0	1	0	1	0	1	1	1	1	1	1	0	0	0	1	0	1	1	0	1	1	1	1	3	0	0	0	1	1	1	1	0	0	0
JHI-Hv50k-2016-183234	0	1	0	1	0	0	0	0	0	0	1	1	1	0	0	0	1	0	1	0	1	1	1	1	1	1	0	0	0	1	0	1	1	0	1	1	1	1	3	0	0	0	1	1	1	1	0	0	0
JHI-Hv50k-2016-184071	0	1	0	1	0	0	0	0	0	0	1	1	1	0	0	0	1	0	1	0	1	1	1	1	1	1	0	0	0	1	0	1	1	0	1	1	1	1	3	0	0	0	1	1	1	1	0	0	0
JHI-Hv50k-2016-184214	0	1	0	1	0	0	0	0	0	0	1	1	1	0	0	0	1	0	1	0	1	1	1	1	1	1	0	0	0	1	0	1	1	0	1	1	1	1	3	0	0	0	1	1	1	1	0	0	0
SCRI-RS-168665	0	1	0	1	0	0	0	0	0	0	1	1	1	0	0	0	1	0	1	0	1	1	1	1	1	1	0	0	0	0	0	1	1	0	1	1	1	1	3	0	0	0	1	1	1	1	0	0	0
JHI-Hv50k-2016-185324	0	1	0	1	0	0	0	0	0	0	1	1	1	0	0	0	1	0	1	0	1	1	1	1	1	1	0	0	0	0	0	1	1	0	1	1	1	1	3	0	0	0	1	1	1	1	0	0	0
JHI-Hv50k-2016-186446	0	1	0	1	0	0	0	0	0	1	1	1	1	0	0	0	1	0	1	0	1	1	1	1	1	1	0	0	0	0	0	1	1	0	1	1	1	1	0	0	0	0	1	1	1	1	0	0	0
SCRI-RS-13376	0	1	0	1	0	0	0	0	0	1	1	1	1	0	0	0	1	0	1	0	1	1	1	1	1	1	0	0	0	0	0	1	1	0	1	1	1	1	0	0	0	0	1	1	1	1	0	0	0
JHI-Hv50k-2016-187190	0	1	0	1	0	0	0	0	0	1	1	1	1	0	0	0	1	0	1	0	1	1	1	1	1	1	0	0	0	0	0	1	1	0	1	1	1	1	0	0	0	0	1	1	1	1	0	0	0
JHI-Hv50k-2016-187232	0	1	0	1	0	0	0	0	0	1	1	1	1	0	0	0	0	0	1	0	1	1	1	1	1	1	0	0	0	0	0	1	1	0	1	1	1	1	0	0	0	0	1	1	1	1	0	0	0
JHI-Hv50k-2016-187263	0	1	0	1	0	0	0	0	0	1	1	1	1	0	0	0	0	0	1	0	1	1	1	1	1	1	0	0	0	0	0	1	1	0	1	1	1	1	0	0	0	0	1	1	1	1	0	0	0
JHI-Hv50k-2016-188022	0	1	0	1	0	0	0	0	0	1	1	1	1	0	0	0	0	0	1	0	1	1	1	1	1	1	0	0	0	0	0	1	1	0	1	1	1	1	0	0	0	0	1	1	1	1	0	0	0
BOPA1-4150-398	0	1	0	1	0	0	0	0	0	1	1	1	1	0	0	0	0	0	1	0	1	1	1	1	1	1	0	0	0	0	0	1	1	0	0	1	1	1	0	0	0	0	1	1	1	1	0	0	0
JHI-Hv50k-2016-190829	0	1	0	1	0	0	0	0	0	1	1	1	1	0	0	0	0	0	1	0	1	1	1	1	1	1	0	0	0	0	0	1	1	0	0	1	1	1	0	0	0	0	1	1	1	1	0	0	0
SCRI-RS-189039	0	1	0	1	0	0	0	0	0	1	0	1	1	0	0	0	0	0	1	0	1	1	1	1	1	1	0	0	0	0	0	1	1	0	0	1	1	1	0	0	0	0	1	1	1	1	0	0	0
JHI-Hv50k-2016-192311	0	1	0	1	0	0	0	0	0	1	0	1	1	0	1	0	0	0	1	0	1	1	1	1	1	1	0	0	0	0	1	1	1	0	0	1	1	1	0	0	0	0	1	1	1	1	0	0	0
JHI-Hv50k-2016-194575	0	1	0	1	0	0	0	0	0	1	0	1	1	0	1	0	0	0	1	0	1	1	1	1	1	1	0	0	0	0	1	1	1	0	0	1	1	1	0	0	0	0	1	1	1	1	0	0	0
JHI-Hv50k-2016-194660	0	1	0	1	0	0	0	0	0	1	0	1	1	0	1	0	0	0	1	0	1	1	1	1	1	1	0	0	0	0	1	1	1	0	0	1	1	1	0	0	0	0	1	1	1	1	0	0	0
JHI-Hv50k-2016-194816	0	1	0	1	0	0	0	0	0	1	0	1	1	0	1	0	0	0	1	0	1	1	1	1	1	1	0	0	0	0	1	1	1	0	0	1	1	1	0	0	0	0	1	1	1	1	0	0	0
JHI-Hv50k-2016-194904	0	1	0	1	0	0	0	0	0	1	0	1	1	0	1	0	0	0	1	0	1	1	1	1	1	1	0	0	0	0	1	1	1	0	0	1	1	1	0	0	0	0	1	1	1	1	0	0	0
BOPA1-ABC15290-1-3-262	0	1	0	1	0	0	0	0	0	1	0	1	1	0	1	0	0	0	1	0	1	1	1	1	1	1	0	0	0	0	1	1	1	0	0	1	1	1	0	0	0	0	1	1	1	1	0	0	1
JHI-Hv50k-2016-194941	0	1	0	1	0	0	0	0	0	1	0	1	1	0	1	0	0	0	1	1	1	1	1	1	1	1	0	0	0	0	1	1	1	0	0	1	1	1	0	0	0	0	1	1	1	1	0	0	1
JHI-Hv50k-2016-194953	0	1	0	1	0	0	0	0	0	1	0	1	1	0	1	0	0	0	1	1	1	1	1	1	1	1	0	0	0	0	1	1	1	0	0	1	1	1	0	0	0	0	1	1	1	0	0	0	1
SCRI-RS-155763	0	1	0	1	0	0	0	0	0	1	0	1	1	0	0	0	0	0	1	1	1	1	1	1	1	1	0	0	0	0	1	1	1	0	0	1	1	1	0	0	0	0	1	1	1	0	0	0	1
SCRI-RS-189790	0	1	0	1	0	0	0	0	0	0	0	1	1	0	0	0	0	0	1	1	1	1	1	1	1	1	0	0	0	0	1	1	1	0	0	1	1	1	0	0	0	0	1	1	1	0	0	0	1
JHI-Hv50k-2016-196372	0	1	0	1	0	0	0	0	0	0	0	1	1	0	0	0	0	1	1	1	1	1	1	1	0	1	0	0	0	0	1	1	1	0	0	1	3	1	0	0	0	0	1	1	1	0	0	1	1
SCRI-RS-156111	0	1	0	1	0	0	0	0	0	0	0	1	1	0	0	0	0	1	1	1	1	1	1	1	0	1	0	0	0	0	1	1	1	0	0	1	3	1	0	0	0	0	1	1	1	0	0	1	1
JHI-Hv50k-2016-196644	0	1	0	1	0	0	0	0	0	0	0	1	1	0	0	0	0	1	1	1	1	1	1	1	0	1	0	0	0	0	1	1	1	0	0	1	3	1	0	0	0	0	1	1	1	0	0	1	1
JHI-Hv50k-2016-196962	0	1	0	1	0	0	0	0	0	0	0	1	1	0	0	0	0	1	1	1	1	1	1	1	0	1	0	0	0	0	1	1	1	0	0	1	3	1	0	0	0	0	1	1	1	0	0	1	1
BOPA1-963-386	0	1	0	1	0	0	0	0	0	0	0	1	1	0	0	0	0	1	1	1	1	1	1	1	0	1	0	0	0	0	1	1	1	0	0	1	3	1	0	0	0	0	1	1	1	0	0	1	1
JHI-Hv50k-2016-197187	0	1	0	1	0	0	0	0	0	0	0	1	1	0	0	0	0	1	1	1	1	1	1	1	0	1	0	0	0	0	1	1	1	0	0	1	3	1	0	0	0	0	1	1	1	0	0	1	1
JHI-Hv50k-2016-197393	0	1	0	1	0	0	0	0	0	0	0	1	1	0	0	0	0	1	1	1	1	1	1	1	0	1	0	0	0	0	1	1	1	0	0	1	3	1	0	0	0	0	1	1	1	0	0	1	1
JHI-Hv50k-2016-197534	0	1	0	1	0	0	0	0	0	0	0	1	1	0	0	0	0	1	1	1	1	1	1	1	0	1	0	0	0	0	1	1	1	0	0	1	3	1	0	0	0	0	1	1	1	0	0	1	1
JHI-Hv50k-2016-197572	0	1	0	1	0	0	0	0	0	0	0	1	1	0	0	0	0	1	1	1	1	1	1	1	0	1	0	0	0	0	1	1	1	0	0	1	3	1	0	0	0	0	1	1	1	0	0	1	1
SCRI-RS-206202	0	1	0	1	0	0	0	0	0	0	0	1	0	0	0	0	0	1	1	1	1	1	1	1	0	1	0	0	0	0	1	1	1	0	0	1	3	1	0	0	0	0	1	1	1	0	0	1	1
SCRI-RS-192761	0	1	0	1	0	0	0	0	0	0	0	1	0	0	0	0	0	1	1	1	1	1	1	1	0	1	0	0	0	0	1	1	1	0	0	1	3	1	0	0	0	0	1	1	1	0	0	1	1
JHI-Hv50k-2016-198133	0	1	0	1	0	0	0	0	0	0	0	1	0	0	0	0	0	1	1	1	1	1	1	1	0	1	0	0	1	0	1	1	1	0	0	1	3	1	0	0	0	0	1	1	1	0	0	1	1
JHI-Hv50k-2016-198658	0	1	0	1	0	0	0	0	1	0	0	1	0	0	0	0	0	1	1	1	1	0	1	1	0	1	0	0	1	0	1	1	1	0	0	1	3	1	0	0	0	0	1	1	1	0	0	1	1
SCRI-RS-138193	0	1	0	1	0	0	0	0	1	0	0	0	0	0	0	0	0	1	1	1	1	0	1	1	0	1	0	0	1	0	1	1	1	0	0	1	3	1	3	0	0	0	1	1	1	0	0	1	1
SCRI-RS-115925	0	1	0	1	0	0	0	0	1	0	0	0	0	0	0	0	0	1	1	1	1	0	1	1	0	1	0	0	1	0	1	1	1	0	0	1	3	1	3	0	0	0	1	1	1	0	0	1	1
JHI-Hv50k-2016-199619	0	1	0	1	1	0	0	0	1	0	0	0	0	0	0	0	0	1	1	1	1	0	1	1	0	1	0	0	1	0	1	1	1	0	0	1	3	1	3	0	0	0	1	1	1	0	0	1	1
JHI-Hv50k-2016-200483	0	1	0	1	0	0	0	0	1	0	0	0	0	0	0	0	0	1	1	1	1	0	1	1	0	1	0	0	1	0	1	1	1	0	0	1	0	1	0	0	0	0	1	1	1	0	0	1	1
SCRI-RS-3352	0	1	0	1	0	0	0	0	1	0	0	0	0	0	0	0	0	1	1	1	1	0	1	1	0	1	0	0	1	0	1	1	1	0	0	1	3	1	3	0	0	0	1	1	1	0	0	1	1
SCRI-RS-80331	0	1	0	1	0	0	0	0	1	0	0	0	1	0	0	0	0	1	1	1	1	0	1	1	0	1	0	0	1	0	1	1	1	0	0	1	3	1	3	0	0	0	1	1	1	0	0	1	1
JHI-Hv50k-2016-200905	0	1	0	1	0	0	0	0	1	0	0	0	1	0	0	0	0	1	1	1	1	0	1	1	0	1	0	0	1	0	1	1	1	0	0	1	3	1	3	0	0	0	1	1	1	0	0	1	1
SCRI-RS-235238	0	1	0	1	0	0	0	0	1	0	0	0	1	0	0	0	0	1	1	1	1	0	1	1	0	1	0	0	1	0	1	1	1	0	0	1	3	1	3	0	0	0	1	1	1	0	0	1	1
JHI-Hv50k-2016-201013	0	1	0	1	0	0	0	0	1	0	0	0	1	0	0	0	0	1	1	1	1	0	1	1	0	1	0	0	1	0	1	1	1	0	0	1	3	1	3	0	0	0	1	1	1	0	0	1	1
JHI-Hv50k-2016-201048	0	1	0	1	0	0	0	0	1	0	0	0	1	0	0	0	0	1	1	1	1	0	1	1	0	1	0	0	1	0	1	1	1	0	0	1	3	1	1	0	0	0	1	1	1	0	0	1	1
SCRI-RS-172266	0	1	0	0	0	0	0	0	1	0	0	0	1	0	0	0	0	1	1	1	1	0	1	1	0	1	0	0	1	0	1	1	1	0	0	1	3	1	1	0	0	0	1	1	1	0	0	1	1
JHI-Hv50k-2016-201308	0	1	0	0	0	0	0	0	1	0	0	0	1	0	0	0	0	1	1	1	1	0	1	1	0	1	0	0	1	0	1	1	1	0	0	1	3	1	0	0	0	0	1	1	1	0	0	1	1
JHI-Hv50k-2016-201497	0	1	0	0	0	0	0	0	1	0	0	0	1	0	0	0	0	1	1	1	1	0	1	1	0	1	0	0	1	0	1	1	1	0	0	1	3	1	0	0	0	0	1	1	1	0	0	1	1
JHI-Hv50k-2016-201591	0	1	0	0	0	0	0	0	1	0	0	0	1	0	0	0	0	1	1	1	1	0	1	1	0	1	0	0	1	0	1	1	0	0	0	1	3	1	0	0	0	0	1	1	1	0	0	1	1
JHI-Hv50k-2016-201898	0	1	0	0	0	0	0	0	1	0	0	0	1	0	0	0	0	1	1	1	1	0	1	1	0	1	0	0	1	0	1	1	0	0	0	1	3	1	0	0	0	0	1	1	1	0	0	1	0
SCRI-RS-149566	0	1	0	0	0	0	0	0	1	0	0	0	1	0	0	0	0	1	1	1	1	0	1	1	0	1	0	0	1	0	1	1	0	0	0	1	3	1	0	0	0	0	1	1	1	0	0	1	0
SCRI-RS-114333	0	1	0	0	0	0	0	0	1	0	0	0	1	0	0	0	0	1	1	1	1	0	1	1	0	1	0	0	1	0	1	1	0	0	0	1	3	1	0	0	0	0	1	1	1	0	0	1	0
SCRI-RS-168981	0	1	0	0	0	0	0	0	1	0	0	0	1	0	0	0	0	1	1	1	1	0	1	1	0	1	0	0	1	0	1	0	0	0	0	1	3	1	0	0	0	0	1	1	1	0	0	1	0
SCRI-RS-230069	0	1	0	0	0	0	0	0	1	0	0	0	1	0	0	0	0	1	1	1	1	0	1	1	0	1	0	0	1	0	1	0	0	0	0	1	3	1	1	0	0	0	1	1	1	0	0	1	0
SCRI-RS-231027	0	1	0	0	0	0	0	0	1	0	0	0	1	0	0	0	0	1	1	1	1	0	1	1	0	1	0	0	1	0	1	0	0	0	0	1	3	1	1	0	0	0	1	1	1	0	0	1	0
JHI-Hv50k-2016-202816	0	1	0	0	0	0	0	0	1	0	0	0	1	0	0	0	0	1	1	1	1	0	1	1	0	1	0	0	1	0	0	0	0	0	0	1	3	1	1	0	0	0	1	1	1	0	0	1	0
SCRI-RS-234342	0	1	0	0	0	0	0	0	1	0	0	0	1	0	0	0	0	1	1	1	1	0	1	1	0	1	0	0	1	0	0	0	0	0	0	1	3	1	1	0	0	0	0	1	1	0	0	1	0
SCRI-RS-236528	0	1	0	0	0	0	0	0	1	0	0	0	1	0	0	0	0	1	1	1	1	0	1	1	0	1	0	0	1	0	0	0	0	0	0	1	3	1	1	0	0	0	0	1	1	0	0	1	0
JHI-Hv50k-2016-203893	0	1	0	0	0	0	0	0	1	0	0	0	1	0	0	0	0	1	1	0	1	0	1	1	1	1	0	0	1	0	0	0	0	0	0	3	3	1	1	0	0	1	0	1	1	0	0	1	0
SCRI-RS-192360	0	1	0	0	0	0	0	0	1	0	0	0	1	0	0	0	0	1	1	0	1	0	1	1	3	1	0	0	1	0	0	0	0	0	0	3	3	1	1	0	0	1	0	1	1	0	0	1	0
SCRI-RS-14857	0	1	0	0	0	0	0	0	1	0	0	0	1	0	0	0	0	1	1	0	1	0	1	1	3	1	0	0	1	0	0	0	0	0	0	3	3	1	1	0	0	1	0	1	1	0	0	1	0
JHI-Hv50k-2016-204445	0	1	0	0	0	0	0	0	1	0	0	0	1	0	0	0	0	1	1	0	1	0	1	1	3	1	0	0	1	0	0	0	0	0	0	3	3	1	1	0	0	1	0	1	1	0	0	1	0
BOPA1-5488-1097	0	1	0	0	0	0	0	0	1	0	0	0	1	0	0	0	0	1	1	0	1	0	1	1	3	1	0	0	1	0	0	0	0	1	0	3	3	1	1	0	0	1	0	1	1	0	0	1	0
JHI-Hv50k-2016-204811	0	1	1	0	0	0	0	0	1	0	0	0	1	0	0	0	0	1	1	0	1	0	1	1	3	1	0	0	1	0	0	0	0	1	0	3	0	1	1	0	0	1	0	1	1	0	0	1	0
JHI-Hv50k-2016-204890	0	1	1	0	0	0	0	0	1	0	0	0	1	0	0	0	0	1	1	0	1	0	1	1	3	1	0	0	1	0	0	0	0	1	0	3	0	1	1	0	0	1	0	1	1	0	0	1	1
SCRI-RS-194623	0	1	1	0	0	0	0	0	1	0	0	0	1	0	0	0	0	1	1	0	1	0	1	1	3	1	0	0	1	0	0	0	0	1	1	3	0	1	1	0	0	1	0	1	1	0	1	1	1
JHI-Hv50k-2016-205259	0	1	1	0	0	0	0	0	1	0	0	0	1	0	0	0	0	1	1	0	1	0	1	1	3	1	0	0	1	0	0	0	0	1	1	3	0	1	1	0	0	1	0	1	1	0	1	1	1
BOPA2-12-31238	0	1	1	0	0	0	0	0	1	0	0	0	1	0	0	0	0	1	1	0	1	0	1	1	3	1	0	0	1	0	0	0	0	1	1	3	0	1	1	0	0	1	0	1	1	0	1	1	1
BOPA2-12-20413	0	1	1	0	0	0	0	0	1	0	0	0	1	0	0	0	0	1	1	0	1	0	1	1	3	1	0	0	1	0	0	0	0	1	1	3	0	1	1	0	0	1	0	1	1	0	1	1	1
BOPA2-12-30081	0	1	1	0	1	0	0	0	1	0	0	0	1	0	0	0	0	0	1	0	1	0	1	1	3	1	0	0	1	0	0	0	0	1	1	3	0	1	1	0	0	1	0	1	1	0	1	1	1
JHI-Hv50k-2016-206415	0	1	1	0	1	0	0	0	1	0	0	0	1	1	0	0	0	0	1	0	1	0	1	1	3	1	0	0	1	0	0	0	0	1	1	3	0	1	1	0	0	1	0	1	1	0	1	1	1
BOPA2-12-20369	0	1	1	0	1	0	0	0	1	0	0	0	1	1	0	0	0	0	1	0	1	0	1	1	3	1	0	0	1	0	0	0	0	1	1	3	0	1	1	0	0	1	0	1	1	0	1	1	1
JHI-Hv50k-2016-206595	0	1	1	0	1	0	0	0	1	0	0	0	1	0	0	0	0	0	1	0	1	0	1	1	3	1	0	0	1	0	0	0	0	1	1	3	0	1	1	0	0	1	0	1	1	0	1	1	1
JHI-Hv50k-2016-206600	0	1	1	0	1	0	0	0	1	0	0	0	1	0	0	0	0	0	1	0	1	0	1	1	3	1	0	0	1	0	0	0	0	1	1	3	0	1	0	0	0	1	0	1	1	0	1	1	1
SCRI-RS-146012	0	1	1	0	1	0	0	0	1	0	0	0	1	0	0	0	0	0	1	0	1	0	1	1	3	1	0	0	1	0	0	0	0	1	1	3	0	1	0	0	0	1	0	1	1	0	1	1	1
JHI-Hv50k-2016-206781	0	1	1	0	1	0	0	0	1	0	0	0	1	0	0	0	0	0	1	0	1	0	1	1	3	1	0	0	1	0	0	0	0	1	1	3	0	1	0	0	0	1	0	1	1	0	1	1	1
JHI-Hv50k-2016-206829	0	1	1	0	1	0	0	0	1	0	0	0	1	0	0	0	0	0	1	0	1	0	1	1	3	1	0	0	1	0	0	0	0	1	1	3	0	1	0	0	0	1	0	1	1	0	1	1	1
BOPA2-12-30973	0	1	1	0	1	0	0	0	1	0	0	0	1	0	0	0	0	0	1	0	1	0	1	1	3	1	0	0	1	0	0	0	0	1	1	3	0	1	0	0	0	1	0	1	1	0	0	1	1
JHI-Hv50k-2016-207327	0	1	1	0	1	0	0	0	1	0	0	0	1	0	0	0	0	0	1	0	1	0	1	1	3	1	0	0	1	0	0	0	0	1	1	3	0	1	0	0	0	1	0	1	1	0	0	1	1
JHI-Hv50k-2016-207601	0	1	1	0	1	0	0	0	1	0	0	0	1	0	0	0	0	0	1	0	1	0	1	1	3	1	0	0	1	0	0	0	0	1	1	3	0	1	0	0	0	1	0	1	1	0	0	1	1
JHI-Hv50k-2016-207875	0	1	1	0	1	0	0	0	1	0	0	0	1	0	0	0	0	0	1	0	1	0	1	1	3	1	0	0	1	0	0	0	0	1	1	3	0	1	0	0	0	1	0	1	1	0	0	1	1
JHI-Hv50k-2016-208029	0	1	1	0	1	0	0	0	1	0	0	0	1	0	0	0	0	0	1	0	1	0	1	1	3	1	0	0	1	0	0	0	0	1	1	3	0	1	0	0	0	1	0	1	1	0	0	1	1
SCRI-RS-209963	0	1	1	0	1	0	0	0	1	0	0	0	1	0	0	0	0	0	1	0	1	0	1	1	0	1	0	0	1	0	0	0	0	1	1	1	0	1	0	0	0	1	0	1	1	0	0	1	1
JHI-Hv50k-2016-208711	0	1	1	0	1	0	0	0	1	0	0	0	1	0	0	0	0	0	1	0	1	0	1	1	1	1	0	0	1	0	0	0	0	1	1	1	0	1	0	0	0	1	0	1	1	0	0	1	1
JHI-Hv50k-2016-209285	0	1	1	0	1	0	0	0	1	0	0	0	1	0	0	0	0	0	1	0	1	0	1	1	1	1	0	0	1	0	0	0	0	1	1	1	0	1	0	0	0	1	0	1	1	0	0	1	1
BOPA2-12-31251	0	1	1	0	1	0	0	0	1	0	0	0	1	0	0	0	0	0	1	0	1	0	1	1	1	1	0	0	1	0	0	0	0	1	1	1	0	1	0	0	0	1	0	1	1	0	0	1	1
SCRI-RS-10016	0	1	1	0	1	0	0	0	1	0	0	0	1	0	0	0	0	0	1	0	1	0	1	1	1	1	0	1	1	0	0	0	0	1	1	1	0	1	0	0	0	1	0	1	1	0	0	1	1
SCRI-RS-24545	0	1	1	0	1	0	0	0	1	0	0	0	1	0	0	0	0	0	1	0	1	0	1	1	1	1	0	1	1	0	0	0	0	1	1	1	0	1	1	0	0	1	0	1	1	0	0	1	1
JHI-Hv50k-2016-211367	0	1	1	0	1	0	0	0	1	0	0	0	1	0	0	0	0	0	1	0	1	0	1	1	1	1	0	1	1	0	0	0	0	1	1	1	0	1	1	1	0	1	0	1	1	0	0	1	1
SCRI-RS-231382	0	1	1	0	1	0	0	0	0	0	0	0	1	0	0	0	0	0	1	0	1	0	1	1	1	1	0	1	1	0	0	0	0	1	1	1	0	1	1	1	0	1	0	1	1	0	0	1	1
JHI-Hv50k-2016-212026	0	1	1	0	1	0	0	0	0	0	0	0	1	0	0	0	0	0	1	0	1	0	1	1	1	1	0	1	1	0	0	0	0	1	1	1	0	1	1	1	0	1	0	1	1	0	0	1	1
SCRI-RS-175682	0	1	1	0	1	0	0	0	0	0	0	0	1	0	0	0	0	0	1	0	1	0	1	1	0	1	0	1	1	0	0	0	0	1	1	1	0	1	1	1	0	1	0	1	1	0	0	1	1
JHI-Hv50k-2016-212404	0	1	1	0	1	0	0	0	0	0	0	0	1	0	0	0	0	0	1	0	1	0	1	1	0	0	0	1	1	0	0	0	0	1	1	1	0	1	1	1	0	1	0	1	1	0	0	1	1
SCRI-RS-209285	0	1	1	0	1	0	0	0	0	0	0	0	1	0	0	0	0	0	1	0	1	0	1	1	0	0	0	1	1	0	0	0	0	1	1	1	0	1	1	1	0	1	0	1	1	0	0	1	1
JHI-Hv50k-2016-212629	0	1	1	0	1	0	0	0	0	0	0	0	1	0	0	0	0	0	1	0	1	0	1	1	0	0	0	1	1	0	0	0	0	1	1	1	0	1	1	1	0	1	0	1	1	0	0	1	1
SCRI-RS-183550	0	1	1	0	1	0	0	0	0	0	0	0	1	0	0	0	0	0	1	0	1	0	1	1	0	0	0	1	1	0	0	0	0	1	1	1	0	1	1	1	0	1	0	1	1	0	0	1	1
SCRI-RS-174582	0	1	1	0	1	0	0	0	0	0	0	0	1	0	0	0	0	0	1	0	1	0	1	0	0	0	0	1	1	0	0	0	0	1	1	1	0	1	1	1	0	1	0	1	1	0	0	1	1
SCRI-RS-175220	0	1	1	0	1	0	0	0	0	0	0	0	0	0	0	0	0	0	1	0	1	0	1	0	0	0	0	1	1	0	0	0	0	1	1	1	0	1	1	1	0	1	0	1	1	0	0	1	1
SCRI-RS-169325	0	1	1	0	1	0	0	0	0	0	0	0	0	0	0	0	0	0	1	0	1	0	1	0	0	0	0	1	1	0	0	0	0	1	1	1	0	1	1	1	0	1	0	1	1	0	0	1	0
SCRI-RS-167698	0	1	1	0	1	0	0	0	0	0	0	0	0	0	0	0	0	0	1	0	1	0	1	0	0	0	0	1	1	0	0	0	0	1	1	1	0	1	1	1	0	1	0	1	1	0	0	1	0
SCRI-RS-168977	0	1	1	0	1	0	0	0	0	0	0	0	0	0	0	0	0	0	1	0	1	0	1	0	0	0	0	1	1	0	0	0	0	1	1	1	0	1	1	1	0	1	0	1	1	0	0	1	0
BOPA1-5520-925	0	1	1	0	1	0	0	0	0	0	0	0	0	0	0	0	0	0	1	0	1	0	1	0	0	0	0	1	1	0	0	0	0	1	1	1	0	1	1	1	0	1	0	1	1	0	0	1	0
SCRI-RS-165044	0	1	1	0	1	0	0	0	0	0	0	0	0	0	0	0	0	0	1	0	1	0	1	0	0	0	0	1	1	0	0	0	0	1	1	1	0	1	1	1	0	1	0	1	1	0	0	1	0
SCRI-RS-189186	0	1	1	0	1	0	0	0	0	0	0	0	0	0	0	0	0	0	1	0	1	0	1	0	0	0	0	1	1	0	0	0	0	1	1	1	0	1	1	1	0	1	0	1	1	0	0	1	0
JHI-Hv50k-2016-215289	0	1	1	0	1	0	0	0	0	0	0	0	0	0	0	0	0	0	1	0	1	0	1	0	0	0	0	1	1	0	0	0	1	1	1	1	0	1	1	1	0	1	0	1	1	0	0	1	0
SCRI-RS-189710	0	1	1	0	1	0	0	0	0	1	0	0	0	0	0	0	0	0	1	0	1	0	1	0	0	0	0	1	1	0	0	0	1	1	1	1	0	1	1	1	0	1	0	1	1	0	0	1	0
JHI-Hv50k-2016-215413	0	1	1	0	1	0	0	0	0	1	0	0	0	0	0	0	0	0	1	0	1	0	1	0	0	0	0	1	1	0	0	0	1	1	1	1	0	1	1	1	0	1	0	1	1	0	0	1	0
SCRI-RS-10019	0	1	1	0	1	0	0	0	0	1	0	0	3	0	0	0	1	0	1	0	1	0	1	0	0	0	0	1	1	0	0	0	1	1	1	1	0	1	1	1	0	1	0	1	1	0	0	1	0
JHI-Hv50k-2016-216183	0	1	1	0	1	0	0	0	0	1	0	0	3	0	0	0	1	0	1	0	1	0	1	0	0	0	0	1	1	0	0	0	1	1	1	1	0	1	1	1	0	1	0	1	1	0	0	1	0
SCRI-RS-208722	0	1	1	0	1	0	0	0	0	1	0	0	3	0	0	0	1	0	1	0	1	0	1	0	0	0	0	1	1	0	0	0	1	1	1	1	0	1	1	1	0	1	0	1	0	0	0	1	0
SCRI-RS-110995	0	1	1	0	1	0	0	0	0	1	0	0	3	0	0	0	1	0	1	0	1	0	1	0	0	0	0	1	0	0	0	0	1	1	1	1	0	1	1	1	0	1	0	1	0	0	0	1	0
SCRI-RS-204321	0	1	1	0	1	0	0	0	0	1	0	0	3	0	0	0	1	0	1	0	1	0	1	0	0	0	0	1	0	0	0	0	1	1	1	1	0	1	1	1	0	1	0	1	0	0	0	1	0
SCRI-RS-65010	0	1	1	0	1	0	0	0	0	1	0	0	3	0	0	0	1	0	1	0	1	0	1	0	0	0	0	1	0	0	0	0	1	1	1	1	0	1	1	1	0	1	0	1	0	0	0	1	0
JHI-Hv50k-2016-218766	0	1	1	0	1	0	0	0	0	1	0	0	3	0	0	0	1	0	1	0	1	0	1	0	0	0	0	1	0	0	0	0	1	1	1	1	0	1	1	1	0	1	0	1	0	0	0	1	0
JHI-Hv50k-2016-218879	0	1	1	0	1	0	0	0	0	1	0	0	3	0	0	0	1	0	1	0	1	0	1	0	0	0	0	1	0	0	0	0	1	1	1	1	0	1	1	1	0	1	0	1	0	0	0	1	0
JHI-Hv50k-2016-219059	0	1	1	0	1	0	0	0	0	1	0	0	1	0	0	0	1	0	1	0	1	0	1	0	0	0	0	1	0	0	0	0	1	1	1	1	0	1	1	1	0	1	0	1	0	0	0	1	0
SCRI-RS-230023	0	1	1	0	1	0	0	0	0	1	0	0	1	0	0	0	1	0	1	0	1	0	1	0	0	0	0	1	0	0	0	0	1	1	1	1	0	1	1	1	0	1	0	1	0	0	0	1	0
SCRI-RS-118833	0	1	1	0	1	0	0	0	0	1	0	0	1	0	0	0	1	0	1	0	1	0	1	0	0	0	0	1	0	0	0	0	1	1	1	0	0	1	1	1	0	1	0	1	0	0	0	1	0
SCRI-RS-229623	0	1	1	0	1	0	0	0	0	1	0	0	1	0	0	0	1	0	1	0	1	0	1	0	0	0	0	1	0	0	0	0	1	1	1	0	0	1	1	1	0	1	0	1	0	0	0	0	0
BOPA1-3682-556	0	1	1	0	1	0	0	0	0	1	0	0	0	0	0	0	1	0	1	0	1	0	1	0	0	0	0	1	0	0	0	0	1	1	1	0	0	1	1	1	0	1	0	1	0	0	0	0	0
SCRI-RS-49693	0	1	1	0	1	0	0	0	0	1	0	0	0	0	0	0	1	0	1	0	1	0	1	0	0	1	0	1	0	0	0	0	1	1	1	0	0	1	1	1	0	1	0	1	0	0	0	0	0
BOPA1-7169-713	0	1	1	0	1	0	0	0	0	1	0	0	0	0	0	0	1	0	1	0	1	0	1	0	0	1	0	1	0	0	0	0	1	1	1	0	0	1	1	1	0	1	1	1	0	0	0	0	0
SCRI-RS-127719	0	1	1	0	1	0	0	0	0	1	0	0	0	0	0	0	1	0	1	0	1	0	1	0	0	1	0	1	0	0	3	0	1	1	1	0	0	1	1	1	0	1	1	1	0	0	0	0	0
SCRI-RS-156315	0	1	1	0	1	0	0	0	0	1	0	0	0	0	0	0	1	0	1	0	1	0	1	0	0	1	0	1	0	0	3	0	1	1	1	0	0	1	1	1	0	1	1	1	0	0	0	0	0
JHI-Hv50k-2016-221774	0	1	1	0	1	0	0	0	0	1	0	0	0	0	0	0	1	0	1	0	1	0	1	0	0	1	0	1	0	0	3	0	1	1	1	0	0	1	1	1	0	1	1	1	0	0	0	0	0
SCRI-RS-739	0	1	1	0	1	0	0	0	0	1	0	0	0	0	0	0	1	0	1	0	1	0	1	0	0	1	0	1	0	0	3	0	1	1	1	0	0	1	1	1	0	1	1	1	0	0	0	0	0
SCRI-RS-204353	0	1	1	0	1	0	0	0	0	1	0	0	0	0	0	0	1	0	1	0	1	0	1	0	0	1	0	1	0	0	3	0	1	1	1	0	0	1	1	1	0	1	1	1	0	0	0	0	0
SCRI-RS-202154	0	1	1	0	1	0	0	0	0	1	0	0	0	0	0	0	1	0	1	0	1	0	1	0	0	1	0	1	0	0	3	0	1	1	1	0	0	1	1	1	0	1	1	1	0	0	0	0	0
BOPA1-13494-110	0	1	1	0	1	0	0	0	0	1	0	0	0	0	0	0	1	0	1	0	1	0	1	0	0	1	0	1	0	0	3	0	1	1	1	0	0	1	1	1	0	1	1	1	0	0	0	0	0
JHI-Hv50k-2016-224463	0	1	1	0	1	0	0	0	0	1	0	0	0	0	0	0	1	0	1	0	1	0	1	0	0	1	0	1	0	0	3	0	1	1	1	0	0	1	1	1	0	1	1	1	0	0	0	0	0
JHI-Hv50k-2016-224742	0	1	1	0	1	0	0	0	0	1	0	0	0	0	0	0	1	0	1	0	1	0	1	0	0	1	0	1	0	0	3	0	1	1	1	0	0	1	1	1	0	1	1	1	0	0	0	0	0
SCRI-RS-13426	0	1	1	0	1	0	0	0	0	1	0	0	0	0	0	0	1	0	1	0	1	0	1	0	0	1	0	1	0	0	3	0	1	1	1	0	0	1	1	1	0	1	1	1	0	0	0	0	0
SCRI-RS-162720	0	1	1	0	1	0	0	0	0	1	0	0	0	0	0	0	1	0	1	0	1	0	1	0	0	1	0	1	0	0	3	0	1	1	1	0	0	1	1	1	0	1	1	1	0	0	0	0	0
JHI-Hv50k-2016-225595	0	1	1	0	1	0	0	0	0	1	0	0	0	0	0	0	1	0	1	0	1	0	1	0	0	1	0	1	0	0	0	0	1	1	1	0	0	1	1	1	0	1	1	1	0	0	0	0	0
JHI-Hv50k-2016-225645	0	1	0	1	1	0	1	0	0	1	0	1	1	0	1	1	0	1	0	3	0	0	0	0	1	0	0	3	1	1	1	1	0	1	0	0	1	0	1	1	0	0	1	0	0	0	0	1	0
JHI-Hv50k-2016-227291	0	1	0	1	1	0	1	0	1	1	0	1	1	0	1	1	0	1	0	3	0	0	0	0	1	0	0	3	1	1	1	1	0	1	0	0	1	0	1	1	0	0	1	0	0	0	0	1	0
JHI-Hv50k-2016-227429	0	1	0	1	1	0	1	0	1	1	0	1	1	0	1	1	0	1	0	3	0	0	0	0	1	0	0	3	1	1	1	1	0	1	0	0	1	0	1	1	0	0	1	0	0	0	0	1	0
JHI-Hv50k-2016-227542	0	1	0	1	1	0	1	0	1	1	0	1	1	0	1	1	0	1	0	3	0	0	0	1	1	0	0	3	1	1	1	1	0	1	0	0	1	0	1	1	0	0	1	0	0	0	0	1	0
JHI-Hv50k-2016-227574	0	1	0	1	1	0	1	0	1	1	0	1	1	0	1	1	0	1	0	3	0	0	0	0	1	0	0	3	1	1	1	1	0	1	0	0	1	0	1	1	0	0	1	0	0	0	0	1	0
JHI-Hv50k-2016-227612	0	1	0	1	1	0	1	0	1	1	0	1	1	0	1	1	0	1	0	3	0	0	0	1	1	0	0	3	1	1	1	1	0	1	0	0	1	0	1	1	0	0	1	0	0	0	0	1	0
JHI-Hv50k-2016-227629	0	1	0	1	1	0	1	0	1	1	0	1	1	0	1	1	0	1	0	3	0	0	0	1	1	0	0	3	1	1	1	1	0	1	0	0	1	0	1	1	0	0	1	0	0	0	0	1	0
JHI-Hv50k-2016-227690	0	1	0	1	1	0	1	0	1	1	0	1	1	0	1	1	0	1	0	3	0	0	0	1	1	0	0	3	1	1	1	1	0	1	0	0	1	0	1	1	0	0	1	0	0	0	0	1	0
JHI-Hv50k-2016-227904	0	1	0	1	1	0	1	0	1	1	0	1	1	0	1	1	0	1	0	3	0	0	0	1	1	0	0	3	1	1	1	1	0	1	0	0	1	0	1	1	0	0	1	0	0	0	1	1	0
JHI-Hv50k-2016-228070	0	1	0	1	1	0	1	0	1	1	0	1	1	0	1	1	0	1	0	3	0	0	0	1	1	0	0	3	1	1	1	1	0	1	0	0	1	0	1	1	0	0	1	0	0	0	0	1	0
JHI-Hv50k-2016-228126	0	1	0	1	1	0	1	0	1	1	0	1	1	0	1	1	0	1	0	3	0	0	0	1	1	0	0	3	1	1	1	1	0	1	0	0	1	0	1	1	0	0	1	0	0	0	0	1	0
JHI-Hv50k-2016-228187	0	1	0	1	1	0	1	0	1	1	0	1	1	0	1	1	0	1	0	3	0	0	0	1	1	0	0	0	1	1	1	1	0	1	0	0	1	0	1	1	0	0	1	0	0	0	0	1	0
JHI-Hv50k-2016-228358	0	1	0	1	1	0	1	0	1	1	0	1	1	0	1	0	0	1	0	1	0	0	0	1	1	0	0	0	1	1	0	1	0	1	0	0	1	0	1	1	0	0	1	0	0	0	0	1	0
JHI-Hv50k-2016-228383	0	1	0	1	1	0	1	0	1	1	0	1	1	0	1	0	0	1	0	1	0	0	0	1	1	0	0	0	1	1	0	1	0	1	0	0	1	0	1	1	0	0	1	0	0	0	0	1	0
JHI-Hv50k-2016-228551	0	1	0	1	1	0	1	0	1	1	0	1	0	0	1	0	0	1	0	1	0	0	0	1	1	0	0	0	1	1	0	1	0	1	0	0	1	0	1	1	0	0	1	0	0	0	0	1	0
JHI-Hv50k-2016-228641	0	1	0	1	1	0	1	0	1	1	0	1	0	0	1	0	0	1	0	0	0	0	0	1	1	0	0	0	1	1	0	1	0	1	0	0	1	0	1	1	0	0	1	0	0	0	0	1	0
JHI-Hv50k-2016-228915	0	1	3	1	1	0	1	0	1	1	0	1	0	0	1	0	0	1	0	0	0	0	0	1	1	0	0	0	1	1	0	1	0	1	0	0	1	0	1	1	0	0	1	0	0	0	0	1	0
JHI-Hv50k-2016-228998	0	1	3	1	1	0	1	0	1	1	0	1	0	0	1	0	0	1	0	0	0	0	0	1	1	0	0	0	1	1	0	1	0	1	0	0	1	0	1	1	0	0	1	0	0	0	0	1	0
JHI-Hv50k-2016-229333	0	1	3	0	1	0	0	0	0	1	0	1	0	0	1	0	0	1	0	0	0	0	0	1	1	0	0	0	1	1	3	1	0	1	0	0	1	0	1	1	0	0	1	0	0	0	1	1	0
JHI-Hv50k-2016-229429	0	1	3	0	1	0	1	0	1	1	0	1	0	0	1	0	0	1	0	0	0	0	0	1	1	0	0	0	1	1	3	1	0	1	0	0	1	0	1	1	0	0	1	0	0	0	0	1	0
JHI-Hv50k-2016-229452	0	1	3	0	1	0	0	0	0	1	0	1	0	0	1	0	0	1	0	0	0	0	0	1	1	0	0	0	1	1	3	1	0	1	0	0	1	0	1	1	0	0	1	0	0	0	1	1	0
JHI-Hv50k-2016-229838	0	1	3	0	1	0	0	0	0	1	0	1	0	0	1	0	0	1	0	0	0	0	0	3	1	0	0	0	1	1	3	1	0	1	0	0	1	0	1	1	0	0	1	0	0	0	1	1	0
JHI-Hv50k-2016-230011	0	1	3	0	1	0	0	0	0	1	0	1	0	0	1	0	0	1	0	0	0	0	0	1	1	0	0	0	1	1	3	1	0	1	0	0	1	0	1	1	0	0	1	0	0	0	1	1	0
JHI-Hv50k-2016-230216	0	1	3	0	1	0	0	0	0	1	0	1	0	0	1	0	0	1	0	0	0	0	0	3	1	0	0	0	1	1	3	1	0	1	0	0	1	0	1	1	0	1	1	0	0	0	1	1	0
JHI-Hv50k-2016-230271	0	1	3	0	1	0	0	0	0	1	0	1	0	0	1	0	0	1	0	0	0	0	0	3	1	0	0	0	1	1	3	1	0	1	0	0	1	0	1	1	0	1	1	0	0	0	1	1	0
JHI-Hv50k-2016-230367	0	1	3	0	1	0	0	0	0	1	0	1	0	0	1	0	0	1	0	0	0	0	0	0	1	0	0	0	1	1	3	1	0	1	0	0	1	0	1	1	0	1	1	0	1	0	1	1	0
JHI-Hv50k-2016-230503	0	1	3	0	1	0	0	0	0	1	0	1	0	0	1	0	0	1	0	0	0	0	0	0	1	0	0	0	1	1	3	1	0	1	0	0	1	0	1	1	0	1	1	0	1	0	1	1	0
JHI-Hv50k-2016-230574	0	1	3	0	1	0	0	0	0	1	0	1	0	0	1	0	0	1	0	0	0	0	0	0	1	0	0	0	1	1	0	1	0	1	0	0	1	0	0	1	0	1	1	0	1	0	1	1	0
JHI-Hv50k-2016-230622	0	1	3	0	1	0	0	0	0	1	0	1	0	0	1	0	0	1	0	0	0	0	0	0	1	0	0	0	1	1	0	1	0	1	0	0	1	0	0	1	0	1	1	0	1	0	1	1	0
SCRI-RS-58772	0	1	3	0	1	0	0	0	0	1	0	1	0	1	1	0	0	1	1	0	0	0	0	0	1	0	0	0	1	1	0	1	0	1	0	0	1	0	0	0	0	1	1	0	1	0	1	1	0
BOPA1-1593-1597	0	1	3	0	1	0	0	0	0	1	0	1	0	1	1	0	1	1	1	0	0	0	0	0	1	0	0	0	1	1	0	1	0	1	0	0	1	0	0	0	0	1	1	0	1	0	1	1	0
JHI-Hv50k-2016-230847	0	1	0	0	1	0	0	0	0	1	0	1	0	1	1	0	1	1	1	0	0	1	0	0	1	0	0	0	1	1	0	1	0	0	0	0	1	0	0	0	0	1	1	0	1	0	1	1	0
JHI-Hv50k-2016-230910	0	1	3	0	1	0	0	0	0	1	0	1	0	1	1	0	1	1	1	0	0	1	0	0	1	0	0	0	1	1	0	1	0	0	0	0	1	0	0	0	0	1	1	0	1	0	1	1	0
JHI-Hv50k-2016-230927	0	1	3	0	1	0	0	0	0	1	0	1	0	1	1	0	1	1	1	0	0	1	0	0	1	0	0	0	1	1	0	1	0	0	0	0	1	0	0	0	0	1	1	0	1	0	1	1	0
JHI-Hv50k-2016-230936	0	1	3	0	1	0	0	0	0	1	0	1	0	1	1	0	1	1	1	0	0	1	0	0	1	0	0	0	1	1	0	1	0	0	0	0	0	0	0	0	0	1	1	0	1	0	1	1	0
JHI-Hv50k-2016-231118	0	1	3	0	1	0	0	0	0	1	0	1	0	1	3	0	0	1	1	0	0	1	0	0	1	0	0	0	1	1	0	1	0	0	0	0	0	0	0	0	0	1	1	0	1	0	1	1	0
JHI-Hv50k-2016-231218	0	1	3	0	1	0	0	0	0	1	0	1	0	1	3	0	1	1	1	0	0	1	0	0	1	0	0	0	1	1	0	1	0	0	0	0	0	0	0	0	0	1	1	0	1	0	1	1	0
JHI-Hv50k-2016-231258	0	1	3	0	1	0	0	0	0	1	0	1	0	1	3	0	1	1	1	0	0	1	0	0	1	0	0	0	1	1	0	1	0	0	0	0	0	0	0	0	0	1	1	0	1	0	1	1	0
JHI-Hv50k-2016-231349	0	1	1	0	1	0	0	0	0	1	0	1	0	1	3	0	1	1	1	0	0	1	0	0	0	0	0	0	1	1	0	1	0	0	0	0	0	0	0	0	0	1	1	0	1	0	1	1	0
JHI-Hv50k-2016-231549	0	1	1	0	0	0	0	0	0	1	0	1	0	1	3	0	1	1	1	0	1	1	0	0	0	0	0	0	1	1	0	1	0	0	0	0	0	0	0	0	0	1	1	0	1	0	1	1	0
JHI-Hv50k-2016-231723	0	1	1	0	0	0	0	0	0	1	0	1	0	1	3	0	1	1	1	0	1	1	0	0	0	0	0	0	1	1	0	1	0	0	0	0	0	0	0	0	0	1	1	0	1	0	1	1	0
JHI-Hv50k-2016-231850	0	1	1	0	1	0	0	0	0	1	0	1	0	1	3	1	1	1	1	0	1	1	0	0	0	0	0	0	1	1	0	1	0	0	0	0	0	0	0	0	0	1	1	0	1	0	1	1	0
JHI-Hv50k-2016-231888	0	1	1	0	1	0	0	0	0	1	0	1	0	1	3	1	0	1	1	0	1	1	0	0	0	0	0	0	1	1	0	1	0	0	0	0	0	0	0	0	0	1	1	0	1	0	1	1	0
JHI-Hv50k-2016-232225	0	1	1	0	1	0	0	0	0	1	0	1	0	1	3	1	0	1	1	0	1	1	0	0	0	0	0	0	1	1	0	1	0	0	0	0	0	0	0	0	0	1	1	0	1	0	1	3	0
JHI-Hv50k-2016-232253	0	1	1	0	1	0	0	0	0	1	0	1	0	1	3	1	0	1	1	0	1	1	0	0	0	0	0	0	1	1	0	1	0	0	0	0	0	0	0	0	0	1	1	0	1	0	1	3	0
JHI-Hv50k-2016-232276	0	1	1	0	1	0	0	0	0	1	0	1	0	1	3	1	0	1	1	0	1	1	0	0	0	0	0	0	1	1	0	1	0	0	0	0	0	0	0	0	0	1	1	0	1	0	1	3	0
JHI-Hv50k-2016-232586	0	1	1	0	1	0	0	0	0	1	0	1	0	1	3	1	0	1	1	0	1	1	0	0	0	0	0	0	1	1	0	1	0	0	0	0	0	0	0	0	0	1	1	0	1	0	1	3	0
JHI-Hv50k-2016-232815	0	1	1	0	1	0	0	0	0	1	0	1	0	1	3	1	0	1	1	0	1	1	0	0	0	0	0	0	1	0	0	1	0	0	0	0	0	0	0	0	0	1	1	0	0	0	1	3	0
JHI-Hv50k-2016-232929	0	1	1	0	1	0	0	0	0	1	3	1	0	1	3	1	0	1	3	1	1	1	0	0	0	0	0	0	1	0	0	1	0	0	0	0	0	0	0	0	0	1	1	0	0	0	1	0	0
JHI-Hv50k-2016-233000	0	1	1	0	1	0	0	0	0	1	3	1	0	1	3	1	0	1	3	1	1	1	0	0	0	0	0	0	0	0	0	1	0	0	0	0	0	0	0	0	0	1	1	0	0	1	1	0	0
JHI-Hv50k-2016-234067	0	1	1	0	1	0	0	0	0	1	3	1	0	1	3	1	0	1	3	1	1	1	0	0	0	0	0	0	0	0	0	1	0	0	0	0	0	0	0	0	0	1	1	0	0	1	1	0	0
JHI-Hv50k-2016-234295	0	1	1	0	1	0	0	1	0	1	3	1	0	1	0	1	0	1	3	1	1	1	0	0	0	0	0	0	0	0	0	1	0	0	0	0	0	0	0	0	0	1	1	0	0	1	1	0	0
JHI-Hv50k-2016-234313	0	1	1	0	1	0	0	1	0	1	3	1	0	1	0	1	0	1	3	1	1	1	0	0	0	0	0	0	0	0	0	1	0	0	0	0	0	0	0	0	0	1	1	0	0	1	1	0	0
JHI-Hv50k-2016-234402	0	1	1	0	1	0	0	1	0	1	3	1	0	1	0	1	0	1	3	1	1	1	0	0	0	0	0	0	0	0	0	1	0	0	0	0	0	0	0	0	0	1	1	0	0	1	1	0	0
JHI-Hv50k-2016-234653	0	1	1	0	1	0	0	1	0	1	0	1	0	1	0	1	0	1	3	1	1	1	0	0	0	0	0	0	0	0	0	1	0	0	0	0	0	0	0	0	0	1	1	1	0	1	1	0	0
JHI-Hv50k-2016-235164	0	1	1	0	1	0	0	1	0	1	0	1	0	1	0	1	0	1	3	1	1	1	0	0	0	0	0	0	0	0	1	1	0	0	0	0	0	0	0	0	0	1	1	1	0	1	1	0	0
JHI-Hv50k-2016-235577	0	1	1	0	0	0	0	1	0	1	0	1	0	1	0	1	0	1	3	1	1	1	0	0	0	0	0	0	0	0	1	1	0	0	0	0	0	0	0	0	0	1	1	1	0	1	1	0	0
JHI-Hv50k-2016-235660	0	1	1	0	0	0	0	1	0	1	0	1	0	1	0	1	0	1	3	1	1	1	0	0	0	0	0	0	0	0	1	1	0	0	0	0	0	0	0	0	0	1	1	1	0	1	1	0	0
JHI-Hv50k-2016-236070	0	1	1	0	0	0	0	1	0	1	0	1	0	1	0	1	0	1	3	1	1	1	0	0	0	0	0	0	0	0	1	1	1	0	0	0	0	0	0	0	0	1	1	1	0	1	1	0	0
SCRI-RS-237021	0	1	1	0	0	0	0	1	0	1	0	1	0	1	0	1	0	1	3	1	1	0	0	0	0	0	0	0	0	0	1	1	1	0	0	0	0	0	0	0	0	1	1	1	0	1	1	0	0
JHI-Hv50k-2016-245610	0	1	1	0	0	1	0	1	0	1	0	1	0	1	0	0	0	1	3	1	1	0	0	0	0	0	0	0	0	0	0	1	1	0	0	0	0	0	0	0	0	1	1	1	0	1	1	0	0
JHI-Hv50k-2016-246341	0	1	1	0	0	1	0	1	0	1	0	1	0	1	0	0	0	1	3	1	1	0	0	0	0	0	0	0	0	0	0	1	1	0	0	0	0	0	0	0	0	1	1	1	0	1	1	0	0
JHI-Hv50k-2016-250436	0	1	1	0	0	1	0	1	0	1	0	1	0	1	0	0	0	1	3	1	1	0	0	0	0	0	0	0	0	0	0	1	1	1	0	0	0	0	0	0	0	1	1	1	0	1	0	0	0
JHI-Hv50k-2016-251099	0	1	1	0	0	1	0	1	0	1	0	1	0	1	0	0	0	1	3	1	1	0	0	0	0	0	0	0	0	0	0	1	1	1	0	0	0	0	0	0	0	1	1	1	0	1	0	0	0
JHI-Hv50k-2016-251207	0	1	1	0	0	1	0	1	0	1	0	1	0	1	0	0	0	1	3	1	1	0	0	0	0	0	0	0	0	0	0	1	1	1	0	0	0	1	0	0	0	1	1	1	0	1	0	0	0
JHI-Hv50k-2016-251563	0	1	1	0	0	1	0	1	0	1	0	1	0	0	0	0	0	1	3	1	1	0	0	0	0	0	0	0	0	0	0	1	1	1	0	0	0	1	0	0	0	1	1	1	0	1	0	0	0
JHI-Hv50k-2016-251961	0	1	1	0	0	1	0	1	0	1	0	1	0	0	0	0	0	0	3	1	1	0	0	0	0	0	0	0	0	0	0	1	1	1	0	0	0	1	0	0	0	1	1	1	0	1	0	0	0
JHI-Hv50k-2016-252555	0	1	1	0	0	1	0	1	0	1	0	1	0	0	0	0	0	0	3	1	1	0	0	0	0	0	0	0	0	0	0	1	1	1	0	0	0	1	0	0	0	1	1	1	0	1	0	0	0
JHI-Hv50k-2016-253553	0	1	1	0	0	1	0	1	0	1	0	1	0	0	0	0	0	0	3	1	1	0	0	0	0	0	0	0	0	0	1	1	1	1	0	0	0	1	0	0	0	1	1	1	0	1	0	0	0
SCRI-RS-218193	0	1	1	0	0	1	0	1	0	1	0	1	0	0	0	0	0	0	3	1	1	0	0	0	0	0	0	0	0	0	1	1	1	1	0	0	0	1	0	0	0	1	1	1	0	1	0	0	0
JHI-Hv50k-2016-254477	0	1	1	0	0	1	0	1	0	1	0	1	0	0	0	0	0	0	3	1	1	3	0	0	0	0	0	0	0	0	1	1	1	1	0	0	0	1	0	0	0	1	1	1	0	1	0	0	0
JHI-Hv50k-2016-255186	0	1	1	0	0	1	0	1	0	1	0	1	0	0	0	0	0	0	3	1	1	3	0	0	0	0	0	0	1	0	1	1	1	1	0	0	0	1	0	0	0	1	1	1	0	1	0	0	0
JHI-Hv50k-2016-256451	0	1	1	0	0	1	0	1	0	1	0	1	0	0	0	0	0	1	3	1	1	0	0	0	0	0	0	0	1	0	1	1	1	1	0	0	0	1	0	0	0	1	1	1	0	1	0	0	0
JHI-Hv50k-2016-256939	0	1	1	0	0	1	0	1	0	1	0	1	0	0	0	0	0	1	3	1	1	0	0	0	0	0	0	0	1	0	1	1	1	1	0	0	0	1	0	0	0	1	1	1	1	1	0	0	0
JHI-Hv50k-2016-257096	0	1	1	0	0	1	0	1	0	1	0	1	0	0	0	0	0	1	0	1	1	0	0	0	0	0	0	0	1	0	1	1	1	1	0	0	0	1	0	0	0	1	1	1	1	1	0	0	0
JHI-Hv50k-2016-257323	0	1	1	0	0	1	0	1	0	1	0	1	0	0	0	0	0	1	3	0	1	0	0	0	0	0	0	0	1	0	1	1	1	1	0	0	0	1	0	0	0	1	1	1	1	1	3	0	0
JHI-Hv50k-2016-257417	0	1	1	0	0	1	0	1	0	1	0	1	0	0	0	0	0	1	1	0	1	0	0	0	0	0	0	0	1	0	1	1	1	1	0	0	0	1	1	0	0	1	1	1	1	1	3	0	0
JHI-Hv50k-2016-257666	0	1	1	0	0	1	0	1	0	1	0	1	0	0	0	0	0	1	1	0	1	0	0	0	0	0	0	0	1	0	1	1	1	1	0	0	0	1	1	0	0	1	1	1	1	1	3	0	0
JHI-Hv50k-2016-257938	0	1	1	0	0	1	0	1	0	1	0	1	0	0	0	0	0	1	1	0	1	0	0	0	0	0	0	0	1	0	1	1	1	1	0	0	0	1	1	0	0	1	1	1	1	1	3	0	0
JHI-Hv50k-2016-258168	0	1	1	0	1	1	0	1	0	1	0	1	0	0	0	0	0	1	1	0	1	0	0	0	0	0	0	0	1	0	1	1	1	1	0	0	0	1	1	0	0	1	1	1	1	1	3	0	0
JHI-Hv50k-2016-258458	0	1	1	0	1	1	0	1	0	1	0	1	0	0	0	0	0	1	1	0	1	0	0	0	0	0	0	0	1	0	1	1	1	1	0	0	0	0	1	0	0	1	1	1	1	1	0	0	0
JHI-Hv50k-2016-258493	0	1	1	0	1	1	0	1	0	1	0	1	0	0	0	0	0	1	1	0	1	0	0	0	0	0	0	0	1	0	1	1	1	1	0	0	0	0	1	0	0	1	1	1	1	1	3	0	0
SCRI-RS-171874	0	1	1	0	1	1	0	1	0	1	0	1	0	0	0	0	0	1	1	0	1	0	0	0	0	0	0	0	1	0	1	1	1	1	0	0	0	0	1	1	0	1	1	1	1	1	3	0	0
SCRI-RS-179438	0	1	1	0	1	1	0	1	0	1	0	1	0	0	0	0	0	1	1	0	1	0	0	0	0	0	0	0	0	0	1	1	1	1	0	0	0	0	1	1	0	0	1	1	1	1	3	0	0
SCRI-RS-155536	0	1	1	0	1	1	0	1	0	1	0	1	0	0	0	0	0	1	1	0	1	0	0	0	0	0	0	0	0	0	1	1	1	1	0	1	0	0	1	1	0	0	1	1	1	1	3	0	0
JHI-Hv50k-2016-259161	0	1	1	0	1	1	0	1	0	1	0	1	0	0	0	0	1	0	0	1	1	0	0	0	0	0	0	0	0	0	1	1	1	1	0	1	0	0	1	1	0	0	1	1	1	1	3	0	0
SCRI-RS-200957	0	1	1	0	1	1	0	1	0	1	0	1	0	0	0	0	1	0	0	1	1	0	0	0	0	0	0	0	0	0	1	1	1	1	0	1	0	0	1	1	0	0	1	1	1	1	3	0	0
BOPA1-ConsensusGBS0461-3	0	1	1	0	1	1	0	1	0	1	0	1	0	0	0	0	1	0	0	1	1	0	0	0	0	0	0	0	0	0	1	1	1	1	0	1	0	0	1	1	0	0	1	1	1	1	3	0	0
SCRI-RS-165623	0	1	1	0	1	1	0	1	0	1	0	1	0	0	0	0	1	0	0	1	1	0	0	0	0	0	0	0	0	0	1	1	1	1	0	1	1	0	1	1	0	0	1	1	1	1	3	0	0
SCRI-RS-149449	0	1	1	0	1	1	0	1	0	1	0	1	0	0	0	0	1	0	3	1	1	0	0	0	0	0	0	0	0	0	1	1	1	1	0	1	1	0	1	1	0	0	1	1	1	1	3	0	0
JHI-Hv50k-2016-259968	0	1	1	0	1	1	0	1	0	1	0	1	0	0	0	0	1	0	3	1	1	0	0	0	0	0	0	0	0	0	1	1	1	1	0	1	1	0	1	1	0	0	1	1	1	1	3	0	0
SCRI-RS-238618	0	1	1	0	1	1	0	1	0	1	0	1	0	0	0	0	1	0	3	1	1	0	0	0	0	0	0	0	0	0	0	1	1	1	0	1	1	0	1	1	0	0	1	1	1	1	3	0	0
SCRI-RS-125524	0	1	1	0	1	1	0	1	0	1	0	1	0	0	0	0	1	0	3	1	1	0	0	0	0	0	0	0	0	0	0	1	1	1	0	1	1	0	1	1	0	0	1	1	1	1	3	0	0
SCRI-RS-134956	0	1	1	0	1	1	0	1	0	1	0	1	0	0	0	0	1	0	0	1	1	3	0	0	0	0	0	0	0	0	0	1	1	1	0	1	1	0	3	1	0	0	1	1	1	1	0	0	0
JHI-Hv50k-2016-261147	0	1	1	0	1	1	0	1	0	1	0	1	0	0	0	0	1	0	3	1	1	3	0	0	0	0	0	0	0	0	0	0	1	1	0	1	1	0	3	1	0	0	1	1	1	1	3	0	0
JHI-Hv50k-2016-261149	0	1	1	0	1	1	0	1	0	1	0	1	0	0	0	0	1	0	3	1	1	3	1	0	0	0	0	0	0	0	0	0	1	1	0	1	1	0	3	1	0	0	1	1	1	1	3	0	0
BOPA2-12-31523	0	1	1	0	1	1	0	1	0	1	0	1	0	0	0	0	1	0	3	1	1	3	1	0	0	0	0	0	0	0	0	0	1	1	0	1	1	0	3	1	0	0	0	1	1	0	3	0	0
SCRI-RS-152166	0	1	1	0	1	1	0	1	0	1	0	1	0	0	0	0	1	0	3	1	1	3	1	0	0	0	0	0	0	0	0	0	1	1	0	1	1	0	3	1	0	0	0	1	1	0	3	0	0
JHI-Hv50k-2016-261820	0	1	1	0	1	1	0	1	0	1	0	1	0	0	0	0	1	0	3	1	1	0	1	0	0	0	0	0	0	0	0	0	1	1	0	1	1	0	3	1	0	0	0	1	1	0	3	0	0
SCRI-RS-229409	0	1	1	0	1	1	0	1	0	1	0	1	0	0	0	0	1	0	3	1	1	0	1	0	0	0	0	0	0	0	0	0	0	1	0	1	1	0	3	0	0	0	1	1	1	0	3	0	0
JHI-Hv50k-2016-262458	0	1	1	0	1	1	0	1	0	1	0	1	0	0	0	0	1	0	3	1	1	0	1	0	0	0	0	0	0	0	0	0	0	1	0	1	1	0	1	0	0	0	1	1	1	0	3	0	0
JHI-Hv50k-2016-262430	0	1	1	0	1	1	0	1	0	1	0	1	0	0	0	0	1	0	3	1	1	0	1	0	0	0	0	0	0	0	0	0	0	1	0	1	1	0	1	0	0	0	1	1	1	0	3	0	0
SCRI-RS-230980	0	1	1	0	1	1	0	1	0	1	0	1	0	0	0	0	1	0	3	1	1	0	1	0	0	0	0	0	0	1	0	0	0	1	0	1	1	0	1	0	0	0	1	1	1	0	3	0	0
JHI-Hv50k-2016-262688	0	1	1	0	1	1	0	1	3	1	0	1	0	0	0	0	1	1	3	1	1	0	1	0	0	0	0	0	0	1	1	0	0	1	0	1	1	0	1	0	0	0	1	1	1	0	3	0	0
SCRI-RS-141214	0	1	1	0	1	1	0	1	0	0	0	1	0	0	0	0	1	1	3	1	1	0	1	0	0	0	0	0	0	1	1	0	0	1	0	1	1	0	1	0	0	0	1	1	1	0	3	0	0
JHI-Hv50k-2016-262767	0	1	1	0	1	1	0	1	0	0	0	1	0	0	0	0	1	1	3	1	1	0	1	0	0	0	0	0	0	1	1	0	0	1	0	1	1	0	1	0	0	0	0	1	1	0	3	0	0
JHI-Hv50k-2016-262842	0	1	1	0	1	1	0	1	0	0	0	1	0	0	0	0	1	1	3	1	1	0	1	0	0	0	0	0	0	1	1	0	0	1	0	1	1	0	1	0	0	0	0	1	1	0	3	0	0
JHI-Hv50k-2016-262864	0	1	1	0	1	1	0	1	0	0	0	1	0	0	0	0	1	1	3	1	1	0	1	0	0	0	0	0	0	1	1	0	0	1	0	1	1	0	1	0	0	0	0	1	1	0	3	0	0
SCRI-RS-188944	0	1	1	0	1	1	0	1	0	0	0	1	0	0	0	0	1	1	3	1	1	0	1	0	0	0	0	0	0	1	1	0	0	1	0	1	1	0	1	0	0	0	0	1	1	0	3	0	0
JHI-Hv50k-2016-263017	0	1	1	0	1	1	0	1	0	0	0	1	0	0	0	0	1	1	3	1	1	0	1	0	0	0	0	0	0	1	1	0	0	1	0	1	1	0	1	0	0	0	0	1	1	0	3	0	0
SCRI-RS-168399	0	1	1	0	1	1	0	1	0	0	0	1	0	0	0	0	1	1	3	1	1	0	1	0	0	0	0	0	0	1	1	0	0	1	0	1	1	0	1	0	0	0	0	1	1	0	3	0	0
JHI-Hv50k-2016-263142	0	1	1	0	1	1	0	1	0	0	0	1	0	0	0	0	1	1	3	1	1	3	1	0	0	0	0	0	0	1	1	0	0	1	0	1	1	0	1	0	0	0	0	1	1	0	3	0	0
JHI-Hv50k-2016-263180	0	1	1	0	1	1	0	1	0	0	0	1	0	0	0	0	1	1	3	1	1	3	1	0	0	0	0	0	0	1	1	0	0	1	0	1	1	0	1	0	0	0	0	1	1	0	3	0	0
JHI-Hv50k-2016-263232	0	1	1	0	1	1	0	1	0	1	0	1	0	0	0	0	1	1	3	1	1	1	1	0	0	0	0	0	0	1	1	0	0	1	0	1	1	0	1	0	0	0	0	1	1	0	3	0	0
JHI-Hv50k-2016-263500	0	1	1	0	1	1	0	1	0	1	0	1	0	0	0	0	1	1	3	1	1	1	1	0	0	0	0	0	0	1	1	0	0	1	0	1	1	0	1	0	0	0	0	1	1	0	3	0	0
JHI-Hv50k-2016-263698	0	1	1	0	1	1	0	1	0	1	0	1	0	0	0	0	1	1	3	1	1	1	1	0	0	0	0	0	0	1	1	0	0	1	0	1	1	0	1	0	1	0	0	1	1	0	3	0	0
JHI-Hv50k-2016-263578	0	1	1	0	1	1	0	1	0	1	0	1	0	0	0	0	1	1	3	1	1	1	1	0	0	0	0	0	0	3	1	0	0	1	0	1	1	0	1	0	1	0	0	1	1	0	3	0	0
JHI-Hv50k-2016-263748	0	1	1	0	1	1	0	1	0	1	0	1	0	0	0	0	1	1	0	1	1	1	1	1	0	0	0	0	0	3	1	0	0	1	0	1	1	0	1	0	1	0	0	1	1	0	3	0	0
JHI-Hv50k-2016-263848	0	1	1	0	1	1	0	1	0	1	0	1	0	0	0	1	1	1	0	1	1	1	1	1	0	0	0	0	0	3	1	0	0	1	0	1	1	0	1	0	1	0	0	1	1	0	3	0	0
JHI-Hv50k-2016-263880	0	1	1	0	1	1	0	1	0	1	0	1	0	0	0	1	1	1	0	1	1	1	1	1	0	0	0	0	0	3	1	0	0	1	0	1	1	0	1	0	1	0	0	1	1	0	3	0	0
JHI-Hv50k-2016-263956	0	1	1	0	1	1	0	1	0	1	0	1	0	0	0	1	1	1	0	1	0	1	1	1	0	0	0	0	0	3	1	0	0	1	0	1	1	0	1	0	1	0	0	1	1	0	3	0	0
SCRI-RS-205975	0	1	1	0	1	1	0	1	0	1	0	1	0	0	0	1	1	1	0	1	0	1	1	1	0	0	0	0	0	3	1	0	0	1	0	1	1	0	1	0	1	0	0	1	1	0	3	0	0
SCRI-RS-226787	0	1	0	0	1	1	0	1	0	1	0	1	0	0	0	1	1	1	0	1	0	1	0	1	0	0	0	0	0	3	1	0	0	1	0	1	1	0	1	0	1	0	0	1	1	0	3	0	1
JHI-Hv50k-2016-265269	0	1	0	0	1	1	0	1	0	1	0	1	0	0	0	1	1	1	0	1	0	1	0	1	0	0	0	0	0	3	1	0	0	1	0	1	1	0	1	0	1	0	0	1	1	1	3	0	1
JHI-Hv50k-2016-265513	0	1	0	0	1	1	0	1	0	1	0	1	0	0	0	1	1	1	0	1	0	1	0	1	0	0	0	0	0	3	1	0	0	1	0	1	1	0	1	0	1	0	0	1	1	1	3	0	0
SCRI-RS-228030	0	1	0	0	1	1	0	1	0	1	0	1	0	0	0	1	1	1	0	1	0	1	0	1	0	0	0	0	0	3	1	0	0	1	0	1	1	0	1	0	1	0	0	1	1	1	3	0	0
SCRI-RS-168591	0	1	0	0	1	1	0	1	0	1	0	1	0	0	0	1	1	1	0	1	0	1	0	1	0	0	0	0	1	3	1	0	0	0	0	1	1	0	1	0	1	0	0	1	1	1	3	0	0
SCRI-RS-188827	0	1	0	0	1	1	0	1	0	1	0	1	0	0	0	1	1	1	0	1	0	1	0	1	0	0	0	0	1	3	1	0	0	0	0	1	1	0	1	0	1	0	0	1	1	1	3	0	0
JHI-Hv50k-2016-265983	0	1	0	0	1	1	0	1	0	1	0	1	0	0	0	1	1	1	0	1	0	1	0	1	0	0	0	0	1	3	1	0	0	0	0	1	1	0	1	0	1	0	0	1	0	1	3	0	0
JHI-Hv50k-2016-266331	0	1	0	0	1	1	1	1	0	1	0	1	0	0	0	1	1	1	0	1	1	1	0	1	0	0	0	0	1	1	1	0	0	0	0	1	1	0	1	0	1	0	0	1	0	1	3	0	0
BOPA2-12-30987	0	1	3	0	1	1	1	1	0	1	0	1	0	0	0	1	1	1	0	1	1	1	0	1	0	0	0	0	1	1	1	0	0	0	0	1	1	0	1	0	1	0	0	1	0	1	3	3	0
SCRI-RS-167808	0	1	3	0	1	1	1	1	0	1	0	1	0	0	0	1	1	1	0	1	1	1	0	1	0	0	0	0	1	1	1	0	0	0	1	1	1	0	1	0	1	1	0	1	0	1	3	3	0
SCRI-RS-16715	0	1	3	0	1	1	1	1	0	1	0	1	0	0	0	1	1	1	0	1	1	1	0	1	0	0	0	0	1	1	1	0	0	0	1	1	1	0	1	0	1	1	0	1	0	1	3	3	0
JHI-Hv50k-2016-267154	0	1	1	0	1	1	1	1	0	1	0	0	0	0	0	1	1	1	0	1	1	1	0	1	0	0	0	0	1	1	1	1	0	0	1	1	1	0	1	0	1	1	0	1	0	1	1	1	0
SCRI-RS-9549	0	1	3	0	1	1	1	1	0	1	0	0	0	0	0	1	1	1	0	1	1	1	0	1	0	0	0	0	1	1	1	3	0	0	1	1	1	0	1	0	1	1	0	0	0	1	3	3	0
JHI-Hv50k-2016-267605	0	1	3	0	1	1	1	1	0	1	0	0	0	0	0	1	1	1	0	1	1	1	0	1	0	0	0	0	1	1	1	3	0	0	1	1	1	0	1	0	1	1	0	0	0	1	0	3	0
SCRI-RS-192689	0	1	3	0	1	1	1	1	0	1	0	0	0	0	0	1	1	1	0	1	1	1	0	1	0	0	0	0	1	1	1	3	0	0	1	1	1	0	1	0	1	1	0	0	0	1	0	3	0
JHI-Hv50k-2016-268491	0	1	3	0	1	1	1	1	0	1	0	0	0	0	0	1	1	1	0	1	1	1	0	1	0	0	0	0	1	1	1	3	0	0	1	1	1	0	1	0	1	1	0	0	0	1	0	3	0
SCRI-RS-76975	0	1	1	0	1	1	1	1	0	1	0	0	0	0	0	1	1	1	0	1	1	1	0	1	0	0	1	0	1	1	1	3	0	0	1	0	1	0	1	0	1	0	0	0	0	1	0	1	0
SCRI-RS-196076	0	1	1	0	1	1	0	1	0	1	0	0	0	0	0	1	1	1	0	1	1	1	0	1	0	0	1	0	1	1	1	3	0	0	1	0	1	0	1	0	1	0	0	0	0	1	0	1	0
JHI-Hv50k-2016-269261	0	1	1	0	1	1	0	1	0	1	0	0	0	0	0	1	1	1	0	1	1	1	0	1	0	0	1	0	1	1	1	3	0	0	1	0	1	0	1	0	1	0	0	0	0	1	0	1	0
BOPA1-6019-296	0	1	1	0	1	1	0	1	0	1	0	0	0	0	0	1	1	1	0	1	1	1	0	1	0	0	1	0	1	1	1	3	0	0	1	0	1	0	1	0	1	0	0	0	0	1	0	1	0
SCRI-RS-107762	0	1	1	0	1	1	0	1	0	1	0	0	0	0	0	1	1	1	0	1	1	1	0	1	0	0	1	0	1	1	1	3	0	0	1	0	1	0	1	0	1	0	0	0	0	1	0	1	0
JHI-Hv50k-2016-271541	0	1	1	0	1	1	0	1	0	1	0	0	0	0	0	1	1	1	0	0	1	1	0	0	0	0	1	0	1	1	1	3	0	0	0	0	1	1	1	0	1	0	0	0	0	0	0	1	0
JHI-Hv50k-2016-272241	0	1	1	0	1	1	0	1	0	1	0	0	0	0	0	1	1	1	0	0	1	1	0	0	0	0	1	0	1	1	1	3	0	0	0	0	1	1	1	0	1	0	0	0	0	0	1	1	0
SCRI-RS-222098	0	1	1	0	1	1	0	1	0	1	0	0	0	0	0	1	1	1	1	0	1	1	0	0	0	0	1	0	1	1	1	3	0	0	0	0	1	1	1	0	1	0	0	0	0	0	1	1	0
SCRI-RS-99798	0	1	1	0	1	1	0	1	0	1	0	0	0	0	0	1	1	1	1	0	1	1	0	0	0	0	1	0	1	1	1	3	0	0	0	0	1	1	1	0	1	0	0	0	0	0	1	1	0
SCRI-RS-221876	0	1	1	1	1	1	0	1	0	1	0	0	0	0	0	1	1	1	1	0	1	1	0	0	0	0	1	0	1	1	1	3	0	0	0	0	1	1	1	0	1	0	0	0	0	0	1	1	0
SCRI-RS-142177	0	1	1	1	1	1	0	1	0	1	0	0	0	0	0	1	1	1	1	0	1	1	0	0	0	0	1	0	1	1	1	1	0	0	0	0	1	1	1	0	1	0	0	0	0	0	1	1	0
SCRI-RS-119390	0	1	1	1	1	1	0	1	0	1	0	0	0	0	0	1	1	1	1	0	1	1	0	0	0	0	1	0	1	1	1	1	0	0	0	0	1	1	1	0	0	0	0	0	0	0	1	1	0
JHI-Hv50k-2016-275541	0	1	1	1	1	1	0	1	0	1	0	0	0	0	0	1	1	1	1	0	1	1	0	0	0	0	1	0	1	1	1	1	0	0	0	0	1	0	1	1	0	0	1	0	0	0	1	1	0
SCRI-RS-189599	0	1	1	1	1	1	0	1	0	1	0	0	0	0	0	1	1	1	1	0	1	1	0	0	0	0	1	0	1	1	1	1	0	0	0	0	1	0	1	1	0	0	1	0	0	0	1	1	0
SCRI-RS-165088	0	1	1	1	1	1	0	1	0	1	0	0	0	0	0	1	1	1	1	0	1	1	0	0	0	0	1	0	1	1	1	1	0	0	0	0	1	0	1	1	0	0	1	0	0	0	1	1	0
SCRI-RS-137053	0	1	0	1	1	1	0	0	0	0	0	1	1	1	0	0	1	1	1	0	0	1	0	0	1	1	1	0	1	0	3	1	0	0	0	1	0	1	1	0	1	0	1	0	1	1	1	0	1
JHI-Hv50k-2016-277334	0	1	0	1	1	1	0	0	0	0	0	1	1	1	0	0	1	1	1	0	0	1	0	0	1	1	1	0	1	0	0	1	0	0	0	1	0	1	1	0	1	0	1	0	1	1	1	0	1
SCRI-RS-179411	0	1	0	1	1	1	0	0	0	0	0	1	1	1	0	0	1	1	1	0	0	1	0	0	1	1	1	0	1	0	3	1	0	0	0	1	0	1	1	0	1	0	1	0	1	1	1	0	1
SCRI-RS-133909	0	1	0	1	1	1	0	0	0	0	0	1	1	1	0	0	1	1	1	0	0	1	0	0	1	1	1	0	1	0	3	1	0	0	0	1	0	1	1	0	1	0	1	0	1	1	1	0	1
JHI-Hv50k-2016-277771	0	1	0	1	1	1	0	0	0	0	0	1	1	1	0	0	1	1	1	0	0	1	0	0	1	1	1	0	1	0	0	1	0	0	0	1	0	1	1	0	1	0	1	0	1	1	1	0	1
SCRI-RS-31797	0	1	0	1	1	1	0	0	0	0	0	1	1	1	0	0	1	1	1	0	0	1	0	0	1	1	1	0	1	0	3	1	1	0	0	1	0	1	1	0	1	0	1	0	1	1	1	0	1
SCRI-RS-168359	0	1	0	1	1	1	0	0	0	0	0	1	1	1	0	0	1	1	1	0	0	1	0	0	1	0	1	0	1	0	3	1	1	0	0	1	0	1	1	0	1	0	1	0	1	1	1	0	1
SCRI-RS-236640	0	1	0	1	1	1	0	0	0	0	0	1	1	1	0	0	1	1	1	0	0	1	0	1	1	0	1	0	1	0	3	1	1	0	0	1	0	1	1	0	1	0	1	0	1	1	1	0	1
JHI-Hv50k-2016-278357	0	1	1	1	1	1	0	0	0	0	0	1	1	1	0	0	1	1	1	0	0	1	0	1	1	0	1	0	1	0	1	1	1	0	0	1	0	1	1	0	1	0	1	0	1	1	1	0	1
JHI-Hv50k-2016-278437	0	1	1	1	1	1	0	0	0	0	0	1	1	1	0	0	1	1	1	0	0	1	0	1	1	0	1	0	1	0	0	1	1	0	0	1	0	1	1	0	1	0	1	0	1	1	1	0	1
JHI-Hv50k-2016-278438	0	1	1	1	1	1	0	0	0	0	0	1	1	1	0	0	1	1	1	0	0	1	0	1	1	0	1	0	1	0	0	1	1	0	0	1	0	1	1	0	1	0	1	0	1	1	1	0	1
JHI-Hv50k-2016-278463	0	1	1	1	1	1	0	0	0	0	0	1	1	1	0	0	1	1	1	0	0	1	0	1	1	0	1	0	1	0	1	1	1	0	0	1	0	1	1	0	1	0	1	0	1	1	1	0	1
JHI-Hv50k-2016-278520	0	1	1	1	1	1	0	0	0	0	0	1	1	1	0	0	1	1	1	0	0	1	0	1	1	0	1	0	1	0	0	1	1	0	0	1	0	1	1	0	1	0	1	0	1	1	1	0	1
JHI-Hv50k-2016-278561	0	1	1	1	1	1	0	0	0	0	0	1	1	1	0	0	1	1	1	0	0	0	0	1	1	0	1	0	1	0	0	1	1	0	0	1	0	1	0	0	1	0	1	0	1	1	1	0	1
JHI-Hv50k-2016-278708	0	1	1	1	1	1	0	0	0	0	1	1	1	1	0	0	1	1	1	0	0	0	0	1	1	0	1	0	1	0	0	1	1	0	0	1	0	1	0	0	1	0	1	0	1	1	1	0	0
JHI-Hv50k-2016-278777	0	1	1	1	1	1	0	0	0	0	1	1	1	1	0	0	1	1	1	0	0	0	0	1	1	0	1	0	1	0	0	1	1	0	0	1	0	1	0	0	1	0	1	0	1	1	1	0	0
SCRI-RS-181570	0	1	1	1	1	1	0	0	0	0	1	1	1	1	0	0	1	1	1	0	0	0	0	1	1	0	1	1	1	0	0	1	1	0	0	1	0	1	0	0	1	0	1	0	1	1	1	0	0
JHI-Hv50k-2016-279014	0	1	1	1	1	1	0	0	0	0	1	1	1	1	0	0	1	1	1	0	0	0	0	1	1	0	1	1	1	0	0	1	1	0	0	1	0	1	0	0	1	0	1	0	1	1	1	0	0
SCRI-RS-214760	0	1	1	1	1	1	0	0	0	0	1	1	1	1	0	0	1	0	1	0	0	0	0	1	1	0	1	1	1	0	0	1	1	0	0	1	0	1	0	0	1	0	1	0	1	1	1	0	0
JHI-Hv50k-2016-279129	0	1	1	1	1	1	0	0	0	0	1	1	1	1	0	0	1	0	1	0	0	1	0	1	1	0	1	1	1	0	0	1	1	0	0	1	1	1	0	0	1	0	1	0	1	1	1	0	0
BOPA1-10207-1024	0	1	1	1	1	1	0	0	0	0	1	1	1	1	0	0	1	0	1	0	0	1	0	1	1	0	1	1	1	0	0	1	1	1	0	1	1	1	0	0	1	0	1	0	1	1	1	0	0
JHI-Hv50k-2016-279230	0	1	1	1	1	1	0	0	0	0	1	1	1	1	0	0	1	0	1	0	0	1	0	1	1	0	1	1	1	0	0	1	1	1	0	1	1	1	0	0	1	0	1	0	1	1	1	0	0
JHI-Hv50k-2016-279246	0	1	1	1	1	1	0	0	0	0	1	1	1	1	0	0	1	0	1	0	0	1	0	1	1	0	1	1	1	0	0	1	1	1	0	1	1	1	0	0	1	0	1	0	1	1	1	0	0
JHI-Hv50k-2016-279306	0	1	1	1	1	1	0	0	0	0	1	1	1	1	0	0	1	0	1	0	0	1	0	1	1	0	1	1	1	0	0	1	1	1	0	1	1	1	0	0	1	0	1	0	1	1	1	0	0
JHI-Hv50k-2016-279677	0	1	1	1	1	1	0	0	0	0	1	1	1	1	0	0	1	0	1	0	0	1	0	1	1	0	1	1	1	0	0	1	1	1	0	1	1	1	0	0	1	0	1	0	1	1	1	0	0
JHI-Hv50k-2016-280168	0	1	1	1	1	1	0	0	0	0	1	1	1	1	0	0	1	0	1	0	0	1	0	1	1	0	1	1	1	0	0	1	1	1	0	1	1	1	0	0	1	0	1	0	1	1	1	0	0
JHI-Hv50k-2016-280756	0	1	1	1	1	1	0	0	0	0	1	1	1	1	0	0	1	0	1	0	0	1	0	1	1	0	1	1	1	0	0	0	1	1	0	1	3	1	0	0	1	0	1	0	1	1	1	0	0
JHI-Hv50k-2016-280900	0	1	1	1	1	1	0	0	1	0	1	1	1	1	0	0	1	0	1	0	0	1	0	1	1	0	1	0	1	0	0	0	1	1	0	0	3	1	0	0	1	0	1	0	1	1	1	0	0
BOPA2-12-30167	0	1	1	1	1	1	0	0	1	0	1	1	1	1	0	0	1	0	1	0	0	1	0	1	1	0	1	0	1	0	0	0	1	0	0	0	3	1	0	0	1	0	1	0	1	1	1	0	0
SCRI-RS-157444	0	1	1	1	1	1	0	0	0	0	1	1	1	0	0	0	1	0	1	0	0	1	0	1	1	0	1	0	1	0	0	0	1	0	0	0	3	1	0	0	1	0	1	0	1	1	1	0	0
JHI-Hv50k-2016-281660	0	1	1	1	1	1	0	0	0	0	1	1	1	0	0	0	1	0	1	1	0	1	0	1	1	0	1	0	1	0	1	1	1	0	0	0	0	1	0	0	1	0	0	0	1	1	1	0	0
JHI-Hv50k-2016-281717	0	1	1	1	1	1	0	0	0	0	1	1	1	0	0	0	1	0	1	1	0	1	0	1	1	0	1	0	1	0	1	1	1	0	0	0	0	1	0	0	1	0	0	0	1	1	1	0	0
JHI-Hv50k-2016-281741	0	1	1	1	1	1	0	0	0	0	1	1	1	0	0	0	1	0	1	1	0	1	0	1	1	0	1	0	1	0	1	1	1	0	0	0	0	1	0	0	1	0	0	0	1	1	1	0	0
JHI-Hv50k-2016-281958	0	1	1	1	1	1	0	0	0	0	1	1	1	0	0	0	1	0	1	1	0	1	0	1	1	0	1	0	1	0	1	1	1	0	0	0	0	1	0	0	1	0	0	0	1	1	1	0	0
BOPA1-ABC01741-1-4-299	0	1	1	1	1	1	0	0	0	0	1	1	1	0	0	0	1	0	1	1	0	1	0	1	1	0	1	1	1	0	1	1	1	0	0	0	0	1	0	0	1	0	0	0	1	1	1	0	0
JHI-Hv50k-2016-282203	0	1	1	1	1	1	0	0	0	0	1	1	1	0	0	0	1	0	1	1	0	1	0	1	1	0	1	1	1	0	1	1	1	0	0	0	0	1	0	0	1	0	0	0	1	1	1	0	0
SCRI-RS-7720	0	1	1	1	1	1	0	0	0	0	1	1	1	0	0	0	1	0	1	1	0	1	0	1	1	0	1	1	1	0	1	1	1	0	0	0	0	1	0	0	1	0	0	0	1	1	1	0	0
JHI-Hv50k-2016-282698	0	1	1	1	1	1	0	0	0	0	1	1	1	0	0	0	1	0	1	1	0	1	0	1	1	0	1	1	1	0	1	1	1	0	0	0	0	1	0	0	1	0	0	0	1	1	1	0	0
JHI-Hv50k-2016-283618	0	1	1	1	1	1	0	0	0	0	1	1	1	0	0	0	1	0	1	1	0	1	0	1	1	0	1	1	1	0	1	1	1	0	0	0	0	1	0	0	1	0	0	0	1	1	1	0	0
JHI-Hv50k-2016-283047	0	1	1	1	1	1	0	0	0	0	1	1	1	0	0	0	1	0	1	1	0	1	0	1	1	0	1	1	1	0	1	1	1	0	0	0	0	1	0	0	1	0	0	0	1	1	1	0	0
JHI-Hv50k-2016-283746	0	1	1	1	1	1	0	0	0	1	1	1	1	0	0	0	1	0	1	1	0	1	0	1	1	0	1	1	1	0	1	1	1	0	0	0	0	1	0	0	1	0	0	0	1	1	1	0	1
JHI-Hv50k-2016-283861	0	1	1	1	1	1	0	0	0	1	1	1	1	0	0	0	1	0	1	1	0	1	0	1	1	0	1	1	1	0	1	1	1	0	0	0	0	1	0	0	1	0	0	0	1	1	1	0	1
JHI-Hv50k-2016-284198	0	1	1	1	1	1	0	0	0	1	1	1	1	0	0	0	1	0	1	1	0	1	0	1	1	0	1	1	1	0	1	1	1	0	0	0	0	1	0	0	1	0	0	0	1	1	1	0	1
SCRI-RS-156016	0	1	1	1	1	1	0	0	0	1	1	1	1	0	0	0	1	0	1	1	0	1	0	1	1	0	1	1	1	0	1	1	1	0	0	0	0	1	0	0	1	0	0	0	1	1	1	0	1
JHI-Hv50k-2016-284404	0	1	1	1	1	1	1	0	0	1	1	1	1	0	0	0	1	0	1	1	0	1	0	1	1	0	1	1	1	0	1	1	1	0	0	0	0	1	0	0	1	0	0	0	1	1	1	0	1
JHI-Hv50k-2016-284988	0	1	1	0	1	1	1	0	0	1	1	1	1	0	0	0	1	0	1	1	0	1	0	1	1	0	1	1	1	3	1	1	1	0	0	0	0	1	0	1	1	0	0	0	1	1	1	0	1
JHI-Hv50k-2016-285349	0	1	1	0	1	1	1	0	0	0	1	1	1	0	0	0	1	0	1	1	0	1	0	1	1	0	1	1	1	3	1	1	1	0	0	0	0	1	0	1	1	0	0	0	1	1	1	0	1
JHI-Hv50k-2016-285304	0	1	1	0	1	1	1	0	0	0	1	1	0	0	0	0	1	0	1	1	0	1	0	1	1	0	1	1	1	3	1	1	1	0	0	0	0	1	0	1	1	0	0	0	1	1	1	0	1
JHI-Hv50k-2016-285845	0	1	1	0	1	1	1	0	0	0	1	1	0	1	0	0	1	0	1	1	0	1	0	1	1	0	1	1	1	3	1	1	1	0	0	0	0	1	0	1	1	0	0	0	1	1	1	0	1
JHI-Hv50k-2016-286076	0	1	1	0	1	1	1	0	0	0	1	1	0	1	0	0	1	0	1	1	0	1	0	1	1	0	1	1	1	3	1	1	1	0	1	0	0	1	0	1	1	0	0	1	1	1	1	0	1
JHI-Hv50k-2016-286861	0	1	1	0	1	1	1	0	0	0	1	1	0	1	0	0	1	0	1	1	0	1	0	1	1	0	1	1	1	0	1	1	1	0	1	0	0	1	0	1	1	0	0	1	1	1	1	0	1
JHI-Hv50k-2016-286923	0	1	1	0	1	1	1	0	0	0	1	1	0	1	0	0	1	0	1	1	0	1	0	1	1	0	1	1	1	3	1	1	1	0	1	0	0	1	0	1	1	0	0	1	0	1	1	0	1
JHI-Hv50k-2016-287160	0	1	1	0	1	1	1	0	0	0	1	1	0	1	0	1	1	0	1	1	0	1	0	1	1	0	1	1	1	3	1	1	1	0	1	0	0	1	0	1	1	0	0	1	0	1	1	0	1
JHI-Hv50k-2016-287267	0	1	1	0	1	1	1	0	0	0	1	1	0	1	0	1	1	0	1	1	0	1	0	1	1	0	1	1	1	3	1	1	1	0	1	0	0	1	0	1	1	0	0	1	0	1	1	0	1
JHI-Hv50k-2016-289452	0	1	1	0	1	1	1	0	0	0	1	1	0	1	0	1	1	0	1	1	0	1	0	1	1	0	1	1	1	3	1	1	1	0	1	0	0	1	0	1	1	0	0	1	0	1	1	0	1
JHI-Hv50k-2016-289697	0	1	1	0	1	1	1	0	0	0	1	1	0	1	0	1	1	0	1	1	0	1	0	1	1	0	1	1	1	3	1	1	1	0	1	0	0	1	0	1	1	0	0	1	0	1	1	0	1
JHI-Hv50k-2016-290581	0	1	0	0	1	1	1	0	0	0	1	1	0	1	0	1	1	0	1	1	0	1	0	1	1	0	1	1	1	3	1	1	1	0	1	0	0	1	0	1	1	0	0	1	0	1	1	0	1
SCRI-RS-41519	0	1	0	0	1	1	1	0	0	0	1	1	0	1	0	1	1	0	1	1	0	1	0	1	1	0	1	1	1	3	1	1	1	0	1	0	0	1	0	1	1	0	0	1	0	1	1	0	1
JHI-Hv50k-2016-299558	0	1	0	0	1	1	1	0	0	0	1	1	0	1	0	1	1	0	1	1	0	1	0	1	1	0	1	1	1	3	1	1	1	0	1	0	0	1	0	1	1	0	0	1	0	1	1	0	1
JHI-Hv50k-2016-300092	0	1	0	0	1	1	1	0	0	0	1	1	0	1	0	1	1	0	1	1	0	1	0	1	1	0	1	1	1	3	1	1	1	0	1	0	1	1	0	1	1	0	0	1	0	1	1	0	1
JHI-Hv50k-2016-300156	0	1	0	0	1	1	1	0	0	0	1	1	0	1	0	1	1	0	1	1	0	1	0	1	1	0	1	1	1	3	1	1	1	0	1	0	1	1	0	0	1	0	0	1	0	1	1	0	1
JHI-Hv50k-2016-301766	0	1	0	0	1	1	1	0	0	0	1	1	0	1	0	1	1	0	1	1	0	1	0	1	1	0	1	1	1	3	1	0	1	0	1	0	1	1	0	0	1	0	0	1	0	1	1	0	1
JHI-Hv50k-2016-303071	0	1	0	0	1	1	1	0	0	0	1	1	0	1	0	1	1	0	1	1	1	1	0	1	1	0	1	1	1	3	1	0	1	0	1	0	1	1	0	0	1	0	0	1	0	1	1	0	1
BOPA2-12-31280	0	1	0	0	1	1	1	0	0	0	1	1	0	1	0	1	1	0	1	1	1	1	0	1	1	0	1	1	1	1	1	0	1	0	1	0	1	1	0	0	1	3	0	1	0	1	1	0	1
JHI-Hv50k-2016-304298	0	1	0	0	1	1	1	0	0	0	1	1	0	1	0	1	1	0	1	1	1	1	0	1	1	0	1	1	1	3	1	0	1	0	1	0	1	1	0	0	1	0	0	1	0	1	1	0	1
JHI-Hv50k-2016-304801	0	1	0	0	1	1	1	0	0	0	1	1	0	1	0	1	1	0	1	1	1	1	0	1	1	0	1	1	1	3	1	0	1	0	1	0	1	1	0	0	1	0	0	1	0	1	1	0	1
JHI-Hv50k-2016-304977	0	1	0	0	1	1	1	0	0	0	1	1	0	1	0	1	1	0	1	1	1	1	0	1	1	0	1	1	1	3	1	0	1	0	1	0	1	1	0	0	1	0	0	1	0	1	1	0	1
JHI-Hv50k-2016-305138	0	1	0	0	1	1	1	0	0	0	1	1	0	1	0	1	1	0	1	1	1	1	0	1	1	0	1	1	1	3	1	0	1	1	1	0	1	1	0	0	1	0	0	1	0	1	1	0	1
JHI-Hv50k-2016-306738	0	1	0	0	1	1	1	0	1	0	1	1	0	1	0	1	1	0	1	1	1	0	0	1	1	0	1	1	1	1	1	0	1	1	1	0	1	1	0	0	1	0	0	1	0	1	1	0	1
JHI-Hv50k-2016-306833	0	1	0	0	1	1	1	0	1	0	1	1	0	1	0	1	1	0	1	1	1	0	0	1	1	0	1	1	1	1	1	0	1	1	1	0	1	1	0	0	1	0	0	1	0	1	1	0	1
JHI-Hv50k-2016-306899	0	1	0	0	1	1	1	0	1	0	1	1	0	1	0	1	1	0	1	1	1	0	0	1	1	0	1	1	1	1	1	0	1	1	1	0	1	1	0	0	1	0	0	1	0	1	1	0	1
JHI-Hv50k-2016-306976	0	1	0	0	1	1	1	0	1	0	1	1	0	1	0	1	1	0	1	1	1	0	0	1	1	0	1	1	1	1	1	0	1	1	1	0	1	1	0	0	1	0	0	1	0	1	1	0	1
JHI-Hv50k-2016-307231	0	1	0	0	1	1	1	0	1	0	1	1	0	1	0	1	1	0	1	1	1	0	0	1	1	0	1	1	1	1	1	0	1	1	1	0	1	1	0	0	1	0	0	1	0	1	1	0	1
JHI-Hv50k-2016-307400	0	1	0	0	1	1	1	0	1	0	1	1	0	1	0	1	1	0	1	1	1	0	0	1	1	0	1	1	1	1	1	0	1	1	1	0	1	1	0	0	1	0	1	1	0	1	1	0	1
JHI-Hv50k-2016-307445	0	1	0	0	1	1	1	0	1	0	1	1	0	1	0	1	1	0	1	1	1	0	0	1	1	0	1	1	1	1	1	0	1	1	1	0	1	1	0	0	1	0	1	1	0	1	1	0	1
JHI-Hv50k-2016-307448	0	1	0	0	1	1	1	0	1	0	1	1	0	1	0	1	1	0	1	1	1	0	0	1	1	0	1	1	1	1	1	0	1	1	1	0	1	1	0	0	1	0	1	1	1	1	1	0	1
JHI-Hv50k-2016-307469	0	1	0	0	1	1	1	0	1	0	1	1	0	1	0	1	1	0	1	1	1	0	0	1	1	0	1	1	1	1	1	0	1	1	1	0	1	1	0	0	1	0	1	1	0	1	1	0	1
JHI-Hv50k-2016-307490	0	1	0	0	1	1	1	0	1	0	1	1	0	1	0	1	1	0	1	1	1	0	0	1	1	0	1	1	1	1	1	0	1	1	1	0	1	1	0	1	1	0	1	1	1	1	1	0	1
JHI-Hv50k-2016-307532	0	1	0	0	1	1	1	0	1	1	1	1	0	1	0	1	1	0	1	1	1	0	0	1	1	0	1	1	1	1	0	0	1	1	1	0	1	1	0	1	1	0	1	1	1	1	1	0	1
BOPA1-7504-485	0	1	0	1	1	1	1	0	1	1	1	1	0	1	0	1	1	0	1	1	1	0	0	1	1	0	1	1	1	1	0	0	1	1	1	0	1	1	0	1	1	0	1	1	1	1	1	0	1
JHI-Hv50k-2016-308340	0	1	0	1	1	1	1	0	1	1	1	1	0	1	0	1	1	0	1	1	1	0	0	1	1	0	1	1	1	1	0	0	1	1	1	0	1	1	0	1	1	0	1	1	1	1	1	0	1
JHI-Hv50k-2016-308409	0	1	0	1	1	1	1	0	1	1	1	1	0	1	0	1	1	0	1	1	1	0	0	1	1	0	1	1	1	1	0	0	1	1	1	0	1	1	0	1	1	0	1	1	1	1	1	0	1
JHI-Hv50k-2016-308537	0	1	0	1	0	1	1	0	1	1	1	1	0	1	0	1	1	0	1	1	1	0	0	1	1	0	1	1	1	1	0	0	1	1	1	0	1	1	0	1	1	0	1	1	1	1	1	0	1
JHI-Hv50k-2016-308562	0	1	0	1	0	1	1	0	1	1	1	1	0	1	0	1	1	0	1	1	1	0	0	1	1	0	1	1	1	1	0	0	1	1	1	0	1	1	0	1	1	0	1	1	1	1	1	0	1
JHI-Hv50k-2016-308564	0	1	0	1	0	1	1	0	1	1	1	1	0	1	0	1	1	0	1	1	1	0	0	1	1	0	1	1	1	1	0	0	1	1	1	0	1	1	0	1	1	0	1	1	1	1	1	0	1
JHI-Hv50k-2016-308570	0	1	0	1	0	1	1	0	1	1	1	1	0	1	1	1	1	0	1	1	1	0	0	1	1	0	1	1	1	1	0	0	1	1	1	0	1	1	0	1	1	0	1	1	1	1	1	0	1
JHI-Hv50k-2016-308620	0	1	0	0	0	1	1	0	1	1	1	1	0	1	1	1	1	0	1	1	1	0	0	1	1	0	1	1	1	1	0	0	1	1	1	0	1	1	0	1	1	0	1	1	1	1	1	0	1
JHI-Hv50k-2016-308753	0	1	0	0	0	1	1	0	1	1	1	1	0	1	1	1	1	0	1	1	1	0	0	1	1	0	1	1	1	1	0	0	1	1	1	0	1	1	0	1	1	0	1	1	1	1	1	0	1
JHI-Hv50k-2016-308845	0	1	0	0	0	1	1	0	1	1	1	1	0	1	1	1	1	0	1	1	1	0	0	1	1	0	1	1	1	1	0	0	1	1	1	0	1	1	0	1	1	0	1	1	1	1	1	0	1
JHI-Hv50k-2016-308901	0	1	0	0	0	1	1	0	1	1	1	1	0	1	1	1	1	0	1	1	1	0	0	1	1	0	1	1	1	1	0	0	1	1	1	0	1	1	0	1	1	0	1	1	1	1	1	0	1
JHI-Hv50k-2016-309085	0	1	0	0	0	1	1	0	1	1	1	1	0	1	1	1	1	0	1	1	1	0	0	1	1	0	1	1	1	1	0	0	1	1	1	0	1	1	0	1	1	0	0	1	1	1	1	0	1
JHI-Hv50k-2016-309620	0	1	0	0	0	1	1	0	1	1	1	1	0	1	1	1	1	0	1	1	1	0	0	1	1	0	1	1	1	1	0	0	1	1	1	0	1	1	0	1	1	0	0	1	1	1	1	0	1
JHI-Hv50k-2016-309802	0	1	0	0	0	1	1	0	1	1	1	1	0	1	1	1	1	0	1	1	1	0	0	1	1	0	1	1	1	1	0	0	1	1	1	0	0	1	0	1	1	0	1	1	1	1	1	0	1
JHI-Hv50k-2016-309828	0	1	0	0	0	1	1	0	1	1	1	1	0	1	1	1	1	0	1	1	1	0	0	1	1	0	1	1	1	1	0	0	1	1	1	0	0	1	0	1	1	0	1	1	1	1	1	0	1
JHI-Hv50k-2016-310290	0	1	0	0	0	1	0	0	1	1	1	1	0	1	1	1	1	0	1	1	1	0	0	1	1	0	1	1	1	1	0	0	1	1	1	0	0	1	0	1	1	0	1	1	1	0	1	0	1
JHI-Hv50k-2016-310468	0	1	0	0	0	1	0	0	1	1	1	1	0	1	1	1	1	0	1	1	1	0	0	1	1	0	1	1	1	1	0	0	0	1	1	0	1	1	0	1	1	0	1	1	1	0	1	1	1
JHI-Hv50k-2016-310515	0	1	0	0	0	1	0	0	1	1	1	1	0	1	1	1	1	0	1	1	1	0	0	1	1	0	1	1	1	1	0	0	0	1	1	0	1	1	0	1	1	0	1	1	1	0	1	1	1
JHI-Hv50k-2016-311179	0	1	0	0	0	1	0	0	1	1	1	1	0	1	1	1	1	0	1	1	1	0	0	1	1	0	1	1	1	1	0	0	0	1	1	0	1	1	0	1	1	0	1	1	1	0	1	1	1
SCRI-RS-160332	0	1	0	0	0	1	0	0	1	1	1	1	0	1	1	1	1	0	1	1	1	0	0	1	1	0	1	1	1	1	0	0	0	1	1	0	1	1	0	1	1	1	1	1	1	0	1	1	1
JHI-Hv50k-2016-311410	0	1	0	0	0	1	0	0	1	1	1	1	0	1	1	1	1	0	1	1	1	0	0	1	1	0	1	1	1	1	0	0	0	1	1	0	1	1	0	1	1	1	1	1	1	0	1	1	1
JHI-Hv50k-2016-311927	0	1	0	0	0	1	0	0	1	1	1	1	0	1	1	1	1	0	1	1	1	0	0	1	1	0	1	1	1	1	0	0	0	1	1	0	1	1	0	0	1	1	1	1	1	0	1	1	1
JHI-Hv50k-2016-311960	0	1	0	0	0	1	0	0	1	1	1	1	0	1	1	1	1	0	1	1	1	0	0	1	1	0	1	1	1	1	0	0	0	1	1	0	1	1	0	0	1	1	1	1	1	0	1	1	1
JHI-Hv50k-2016-314355	0	1	0	0	3	1	0	0	1	1	1	1	0	1	1	1	1	0	1	1	1	0	0	1	1	0	1	0	1	1	0	0	0	1	1	0	1	1	0	0	1	1	1	1	1	0	1	1	1
JHI-Hv50k-2016-315503	0	1	0	0	3	1	0	0	1	1	1	1	0	1	1	1	1	0	1	1	1	3	0	1	1	0	1	0	1	1	0	0	0	1	1	0	1	1	0	0	1	1	1	1	1	0	1	1	1
JHI-Hv50k-2016-315998	0	1	0	0	3	1	0	0	1	1	1	1	0	1	1	1	1	0	1	1	1	3	0	1	1	0	1	0	1	1	0	0	0	1	1	0	1	1	0	0	1	1	1	1	1	0	1	1	1
JHI-Hv50k-2016-316065	0	1	0	0	3	1	0	0	1	1	1	1	0	1	1	1	1	0	1	1	1	1	0	1	1	0	1	0	1	1	0	0	0	1	1	0	1	1	0	0	1	1	1	1	1	0	1	1	1
JHI-Hv50k-2016-316492	0	1	0	0	1	1	0	0	1	1	1	1	0	1	1	1	1	0	1	1	1	1	0	1	1	0	1	0	1	1	0	0	0	1	1	0	1	1	1	0	1	1	1	1	1	0	1	1	1
JHI-Hv50k-2016-316833	0	1	0	0	1	1	0	0	1	1	1	1	0	1	1	1	1	0	1	1	1	1	0	1	1	0	1	0	1	1	0	0	0	1	1	0	1	1	1	0	1	1	1	1	1	0	1	1	1
JHI-Hv50k-2016-317067	0	1	0	0	1	1	0	0	1	1	1	1	0	1	1	1	1	0	1	1	1	1	0	1	1	0	1	0	1	1	0	0	3	1	1	0	1	1	1	0	1	1	1	1	1	0	1	1	1
JHI-Hv50k-2016-317277	0	1	0	0	1	1	0	0	1	1	1	1	0	1	1	1	1	0	1	1	1	1	0	1	1	0	1	0	1	1	0	0	3	1	1	0	1	0	1	0	1	1	1	1	1	0	1	1	1
JHI-Hv50k-2016-317701	0	1	0	0	1	1	0	0	1	1	1	1	0	1	1	1	1	0	1	1	1	1	0	1	1	0	1	0	1	1	0	0	1	1	1	0	1	0	1	0	1	1	1	1	1	0	1	1	1
JHI-Hv50k-2016-318073	0	1	0	0	1	1	0	0	1	1	1	1	0	1	1	1	1	0	1	1	1	1	0	1	1	0	1	0	1	1	0	0	1	1	1	0	1	0	1	0	1	1	1	1	1	0	1	1	1
JHI-Hv50k-2016-318116	0	1	0	0	1	1	0	0	1	1	1	1	0	1	1	1	1	0	1	1	1	1	0	1	1	0	1	0	1	1	0	0	1	1	1	0	1	0	1	0	1	1	1	1	0	0	1	1	1
JHI-Hv50k-2016-318341	0	1	0	0	1	1	0	0	1	1	1	1	0	1	1	1	1	0	1	1	1	1	0	1	1	3	1	0	1	1	0	0	1	1	1	0	1	0	1	0	0	1	1	1	0	0	1	1	1
JHI-Hv50k-2016-318389	0	1	0	0	1	1	0	0	1	1	1	1	0	1	1	1	1	0	1	1	1	1	0	0	1	3	1	0	1	1	0	0	1	1	1	0	1	0	1	0	0	1	1	1	0	0	1	1	1
JHI-Hv50k-2016-318569	0	1	0	0	1	1	0	0	1	1	1	1	0	1	1	1	1	0	1	1	1	1	0	0	1	3	1	0	1	1	0	0	1	1	1	0	1	0	1	0	0	1	1	1	0	0	1	1	1
JHI-Hv50k-2016-318697	0	1	0	0	1	1	0	0	1	1	1	1	0	1	1	1	1	0	1	1	1	1	0	0	1	3	1	0	1	1	0	0	1	1	1	0	1	0	1	0	0	1	1	1	0	0	1	1	1
JHI-Hv50k-2016-319018	0	1	0	0	1	1	0	0	1	1	1	1	0	1	1	1	1	0	1	1	1	1	0	0	1	3	1	0	1	1	0	0	1	1	1	0	1	0	1	0	1	1	1	1	0	1	1	1	1
JHI-Hv50k-2016-319359	0	1	0	0	1	1	0	0	1	1	1	1	0	1	1	1	1	0	1	1	1	1	0	0	1	3	1	0	1	1	0	0	1	1	1	0	1	0	1	0	1	1	1	1	0	1	1	0	1
JHI-Hv50k-2016-319468	0	1	0	0	1	1	0	0	1	1	1	1	0	1	1	1	1	0	1	1	1	1	0	0	1	3	1	0	1	1	0	0	1	1	1	0	1	0	1	0	1	1	1	1	0	1	1	0	1
JHI-Hv50k-2016-319876	0	1	0	0	1	1	0	0	1	1	1	1	0	1	1	1	1	0	1	1	1	1	0	0	1	3	1	0	1	1	0	0	1	1	1	0	1	0	1	0	1	1	1	1	0	1	1	0	1
JHI-Hv50k-2016-319956	0	1	0	0	1	1	0	0	1	1	1	1	0	1	1	1	1	0	1	1	1	1	0	0	1	3	1	0	1	1	0	0	1	1	1	0	1	0	1	0	1	1	1	1	0	1	1	0	1
SCRI-RS-237352	0	1	0	0	1	1	0	0	1	1	1	1	0	1	1	1	1	0	1	1	1	1	0	0	1	1	1	0	1	1	0	0	1	1	1	0	1	0	1	0	1	1	1	1	0	1	1	0	1
JHI-Hv50k-2016-320870	0	1	0	0	1	1	0	0	1	1	1	1	0	1	1	1	1	0	1	1	1	1	0	0	1	1	1	0	1	1	0	0	1	1	1	0	1	0	1	0	1	1	1	1	0	1	1	0	1
JHI-Hv50k-2016-321066	0	1	0	0	1	1	0	0	1	1	1	1	0	1	1	1	1	0	1	1	1	1	0	0	1	1	1	0	1	1	0	0	1	1	1	0	1	0	1	0	1	1	1	1	0	1	1	0	1
JHI-Hv50k-2016-321943	0	1	0	0	1	1	1	0	0	1	1	1	0	1	1	1	1	0	1	1	1	1	0	0	1	1	1	0	1	1	0	0	1	1	1	0	1	0	1	0	1	1	1	1	0	1	1	0	1
JHI-Hv50k-2016-322893	0	1	1	0	0	1	1	1	0	1	1	1	0	1	1	3	1	0	1	1	1	1	0	0	1	1	1	0	1	1	0	0	1	1	1	0	1	0	1	1	1	1	1	1	0	1	1	0	1
JHI-Hv50k-2016-323037	0	1	1	0	0	1	1	1	0	1	1	1	0	1	1	3	1	0	1	1	1	1	0	0	1	1	1	0	1	1	0	0	1	1	1	0	1	0	1	1	1	0	1	1	0	1	1	0	1
JHI-Hv50k-2016-323162	0	1	1	0	0	1	1	1	0	1	1	1	0	1	1	3	1	0	1	1	1	1	0	0	1	1	1	0	1	1	0	0	1	1	1	0	1	0	1	1	1	0	1	1	0	1	1	0	1
JHI-Hv50k-2016-323471	0	1	1	0	0	1	1	1	0	1	1	1	0	1	1	3	1	0	1	1	1	1	0	0	1	1	1	0	1	1	0	0	1	1	1	0	1	0	1	1	1	1	1	1	0	1	1	0	1
JHI-Hv50k-2016-323825	0	1	1	0	0	1	1	1	0	1	1	1	0	1	1	3	1	0	1	0	1	1	0	0	1	1	1	0	1	1	0	0	1	1	1	0	1	0	1	1	1	1	1	1	0	1	1	0	1
SCRI-RS-149088	0	1	1	0	0	1	1	1	0	1	1	1	0	1	1	3	1	0	1	0	1	1	0	0	1	1	1	0	1	1	0	0	1	1	1	0	0	0	1	1	1	0	1	1	0	1	1	0	1
JHI-Hv50k-2016-324018	0	1	1	0	0	1	1	1	0	1	1	1	0	1	1	3	1	0	1	0	1	1	0	0	1	1	1	0	1	1	0	0	1	1	1	0	0	1	1	1	1	0	1	1	0	1	1	0	1
BOPA1-5154-117	0	1	1	0	0	1	1	1	0	1	1	1	0	1	1	3	1	0	1	0	1	1	0	0	1	1	1	0	1	1	0	0	1	1	1	0	0	1	1	1	1	0	1	1	0	1	1	0	1
JHI-Hv50k-2016-325051	0	1	1	0	0	1	3	1	0	1	1	1	0	1	1	0	1	0	1	0	1	1	0	0	1	1	1	0	1	1	0	0	1	1	3	0	0	1	1	1	1	0	1	1	0	1	1	0	1
JHI-Hv50k-2016-325133	0	1	1	0	0	1	1	1	3	1	1	1	0	1	1	3	1	0	1	0	1	1	0	0	1	1	1	0	1	1	0	0	1	1	1	0	0	1	1	1	1	0	1	1	0	1	1	0	1
JHI-Hv50k-2016-326122	0	1	1	0	0	1	1	1	3	1	1	1	0	1	1	1	1	0	1	0	1	1	0	0	1	1	1	0	1	1	0	0	1	1	1	0	0	1	1	1	1	0	1	1	0	1	1	0	1
JHI-Hv50k-2016-326289	0	1	1	0	0	1	1	1	3	1	1	1	0	1	1	1	1	0	1	0	1	1	0	0	1	1	1	0	1	0	0	0	1	1	1	0	0	1	1	1	1	1	1	1	0	1	1	0	1
JHI-Hv50k-2016-326704	0	1	1	0	0	1	1	1	3	1	1	1	0	1	1	1	1	0	1	0	1	1	0	0	1	1	1	0	1	0	0	0	1	1	1	0	0	1	1	1	1	1	1	1	0	1	1	0	1
JHI-Hv50k-2016-326790	0	1	1	0	0	1	1	1	3	1	1	1	0	1	1	1	1	0	1	0	1	1	0	0	1	1	1	0	1	0	0	0	1	1	1	0	0	1	1	1	1	1	1	1	0	1	1	0	1
JHI-Hv50k-2016-327212	0	1	1	0	0	1	1	1	3	1	1	1	0	1	1	1	1	0	1	0	1	1	0	0	1	1	1	0	1	0	0	0	1	1	1	0	0	1	1	1	1	1	1	1	0	1	1	0	1
SCRI-RS-156454	0	1	1	0	0	1	1	1	3	1	1	1	0	1	1	1	1	0	1	0	1	1	0	0	1	1	1	0	1	0	0	0	1	1	1	0	0	1	1	1	1	1	1	1	0	1	1	0	1
JHI-Hv50k-2016-328699	0	1	1	0	0	1	1	1	3	1	1	1	0	1	1	1	1	0	1	0	1	1	0	0	1	1	1	0	1	0	0	0	1	1	1	0	0	1	1	1	1	1	1	1	0	1	1	0	1
JHI-Hv50k-2016-329411	0	1	1	0	0	1	1	1	3	1	1	1	0	1	1	1	1	0	1	0	1	1	0	0	1	1	1	0	1	0	0	0	1	1	1	0	0	1	1	1	1	1	1	1	0	1	1	0	1
JHI-Hv50k-2016-330383	0	1	1	0	0	1	1	1	3	1	1	1	0	1	1	1	1	0	1	0	1	1	0	0	1	1	1	0	1	0	0	0	1	1	1	0	0	1	1	1	1	1	1	1	0	1	1	0	1
JHI-Hv50k-2016-330793	0	1	1	0	0	1	1	1	3	1	1	1	0	1	1	1	1	0	1	0	1	1	0	0	1	1	1	0	1	0	0	0	1	1	1	0	1	1	1	1	1	1	1	1	0	1	1	0	1
SCRI-RS-234330	0	1	1	0	0	1	1	1	0	1	1	1	0	1	1	1	1	0	1	0	1	1	0	0	1	1	1	0	1	0	0	0	1	1	1	0	1	1	1	1	0	1	1	1	0	1	1	0	1
JHI-Hv50k-2016-332845	0	1	1	0	0	1	1	1	3	1	1	1	0	1	1	1	1	0	1	0	1	1	0	0	1	1	1	0	1	0	0	0	1	1	1	0	1	1	1	1	0	1	1	1	0	1	1	0	1
SCRI-RS-159490	0	1	1	0	0	1	1	1	3	1	1	1	0	1	1	1	1	0	1	0	1	1	0	0	1	1	1	0	1	0	0	0	1	1	1	0	1	1	1	1	0	1	1	1	0	1	1	0	1
SCRI-RS-202774	0	1	1	0	0	1	1	1	3	1	1	1	0	1	1	1	1	0	1	0	1	1	0	0	1	1	1	0	1	0	0	0	1	1	1	0	1	1	1	1	0	1	1	1	0	1	1	0	1
JHI-Hv50k-2016-333100	0	1	1	0	0	1	1	1	3	1	1	1	0	1	1	1	1	1	1	0	1	1	0	0	1	1	1	0	1	0	0	0	1	1	1	0	1	1	1	1	0	1	1	1	0	1	1	0	1
BOPA1-ABC04322-1-3-208	0	1	1	0	0	1	1	1	3	1	1	1	1	1	1	1	1	1	1	0	1	1	0	0	1	1	1	0	1	0	0	0	1	1	1	0	1	1	1	1	0	1	1	1	0	1	1	0	1
SCRI-RS-130992	0	1	1	0	0	1	1	1	3	1	1	1	1	1	1	1	1	1	1	0	1	1	0	0	1	1	1	0	1	0	0	0	1	1	1	0	1	1	1	1	0	1	1	1	0	1	1	0	1
JHI-Hv50k-2016-335217	0	1	1	0	0	1	1	1	3	1	1	1	1	1	1	1	1	1	1	0	1	1	0	0	1	1	1	0	1	0	0	0	1	1	1	0	1	1	1	1	0	1	0	1	0	1	1	0	1
JHI-Hv50k-2016-336642	0	1	1	0	0	1	1	1	3	1	1	1	1	1	1	1	1	1	1	0	1	1	0	0	1	1	1	0	1	0	0	0	1	1	1	0	1	1	1	1	0	1	0	1	0	1	1	0	1
JHI-Hv50k-2016-337137	0	1	1	1	0	1	1	1	3	1	1	1	1	1	1	1	1	1	1	0	1	1	0	0	1	1	1	0	1	0	0	0	1	1	1	0	1	1	1	1	0	1	0	1	0	1	1	0	1
JHI-Hv50k-2016-337339	0	1	1	1	0	1	1	1	3	1	1	1	1	1	1	1	1	1	1	0	1	1	0	0	1	1	1	0	1	0	0	0	1	1	1	0	1	1	1	1	0	1	0	1	0	1	1	0	1
JHI-Hv50k-2016-337630	0	1	1	1	0	1	1	1	3	1	1	1	1	1	1	1	1	1	1	0	1	1	0	0	1	1	1	0	1	0	0	0	1	1	1	0	1	1	1	1	0	1	0	1	0	1	1	0	1
JHI-Hv50k-2016-337652	0	1	1	1	0	1	1	1	3	1	1	1	1	1	1	1	1	1	1	0	1	1	0	0	1	1	1	0	1	0	0	0	1	1	1	0	1	1	0	1	0	1	0	1	0	1	1	0	1
JHI-Hv50k-2016-338482	0	1	1	1	0	1	1	1	3	1	1	1	1	1	1	1	1	1	1	0	1	1	0	0	1	1	1	0	1	0	0	0	1	1	1	0	1	1	0	1	0	1	0	0	0	1	1	0	1
JHI-Hv50k-2016-338592	0	1	1	1	0	1	1	1	3	1	1	1	1	1	1	1	1	1	1	0	1	1	0	0	1	1	1	0	1	0	0	0	1	1	1	0	1	1	0	1	0	1	0	0	0	1	1	0	1
JHI-Hv50k-2016-338786	0	1	1	1	0	1	1	1	3	1	1	1	1	1	1	1	1	1	1	0	1	1	0	0	1	1	1	0	1	0	0	0	1	1	1	0	1	1	0	1	0	1	0	0	0	1	1	0	1
JHI-Hv50k-2016-338822	0	1	1	1	0	1	1	1	3	1	1	1	1	1	1	1	1	1	1	0	1	1	0	0	1	1	1	0	1	0	0	0	0	1	1	0	1	1	0	1	0	1	0	0	0	1	1	0	1
JHI-Hv50k-2016-340661	0	1	1	1	0	1	1	0	3	1	1	1	1	1	1	1	1	1	1	0	1	1	0	0	1	1	0	0	1	0	0	0	0	1	1	0	1	1	0	1	0	1	0	0	0	1	0	0	0
JHI-Hv50k-2016-340747	0	1	1	1	0	1	1	0	3	1	1	1	1	1	1	1	1	1	1	0	1	1	0	0	1	1	0	0	1	0	0	0	0	1	1	0	1	1	0	1	0	1	0	0	0	1	0	0	0
JHI-Hv50k-2016-341199	0	1	1	1	0	1	1	0	3	1	1	0	1	1	1	1	1	1	1	0	1	1	0	0	1	1	0	0	1	0	0	0	0	1	1	0	1	1	0	1	0	1	0	0	0	1	0	0	0
JHI-Hv50k-2016-341542	0	1	1	1	0	1	1	0	0	1	1	0	1	1	1	1	1	1	1	0	1	1	0	0	1	1	0	0	1	0	0	0	0	1	1	0	1	1	0	1	0	1	0	0	0	1	0	0	0
JHI-Hv50k-2016-342023	0	1	1	1	0	1	1	0	0	1	1	0	1	1	1	1	0	1	1	0	1	1	0	0	1	1	0	0	1	0	0	0	0	1	1	0	1	1	0	1	0	1	0	0	0	1	0	0	0
JHI-Hv50k-2016-342119	0	1	1	1	0	1	1	0	0	1	1	0	1	1	1	1	1	1	1	0	1	1	0	0	1	1	0	0	1	0	0	0	0	1	1	0	1	1	0	1	0	1	0	0	0	1	0	0	0
SCRI-RS-105705	0	1	1	1	0	1	1	0	0	1	1	0	1	1	1	1	0	1	1	0	1	1	0	0	1	1	0	0	1	0	0	0	0	1	1	0	1	1	0	1	0	1	0	0	0	1	0	0	0
JHI-Hv50k-2016-343060	0	1	1	1	0	1	1	0	0	1	1	0	1	1	1	1	0	1	1	0	1	1	0	0	1	1	0	0	1	0	0	0	0	1	1	0	0	1	0	1	0	1	0	0	0	1	0	0	0
SCRI-RS-146573	0	1	1	1	0	1	1	0	0	1	1	0	1	1	1	1	0	1	1	0	1	1	0	0	1	1	0	0	1	0	0	0	0	1	1	0	0	1	0	1	0	1	0	0	0	1	0	0	0
JHI-Hv50k-2016-344176	0	1	1	1	0	1	1	0	0	1	1	0	1	1	1	1	0	1	1	0	1	1	0	0	1	1	0	0	1	0	0	0	0	1	1	0	0	1	0	1	0	1	0	0	0	3	0	0	0
JHI-Hv50k-2016-344250	0	1	1	1	0	1	1	0	0	1	1	0	1	1	1	1	0	1	1	0	1	1	0	0	1	1	0	0	1	0	0	0	0	1	1	0	0	1	0	1	0	1	0	0	0	3	0	0	1
JHI-Hv50k-2016-344481	0	1	1	1	0	1	1	0	0	1	1	0	1	1	1	1	0	1	1	0	1	1	0	0	1	1	0	0	1	0	0	0	0	1	1	0	0	1	0	1	0	1	0	0	0	3	0	0	1
JHI-Hv50k-2016-344701	0	1	1	1	0	1	1	0	0	1	1	0	1	1	1	1	0	1	1	0	1	1	0	0	1	1	0	0	1	0	0	0	0	1	1	0	0	1	0	1	0	1	0	0	0	3	0	0	1
JHI-Hv50k-2016-345242	0	1	1	1	0	1	1	0	0	1	1	0	1	1	1	1	0	1	1	0	1	1	0	0	1	1	0	0	1	0	0	0	0	1	1	0	0	1	0	1	0	1	0	0	0	3	0	0	1
JHI-Hv50k-2016-346074	0	1	1	1	0	1	1	0	0	1	1	0	1	1	1	1	0	1	1	0	1	1	0	0	1	1	0	0	1	0	1	0	0	1	1	0	0	1	0	1	0	1	0	0	0	3	0	0	1
JHI-Hv50k-2016-346486	0	1	1	1	0	1	1	0	0	1	1	0	1	1	1	1	0	1	1	0	1	1	0	0	1	1	0	0	1	0	1	0	0	1	1	0	0	1	0	1	0	1	0	0	0	1	0	0	1
JHI-Hv50k-2016-346661	0	1	1	1	0	1	1	0	0	1	1	0	1	1	1	1	0	1	1	0	1	1	0	0	1	1	0	0	1	0	1	0	0	1	1	0	0	1	0	1	0	1	0	0	0	1	0	0	1
JHI-Hv50k-2016-346997	0	1	1	1	0	1	1	0	0	1	1	0	1	1	0	1	0	1	1	0	1	0	0	0	1	1	0	0	1	0	1	0	0	1	1	0	0	1	0	1	0	1	0	0	0	0	0	0	1
JHI-Hv50k-2016-347237	0	1	1	1	0	1	1	0	0	1	1	0	1	1	0	1	0	1	1	0	1	0	0	0	1	1	0	0	1	0	1	0	0	1	1	0	0	1	0	1	0	1	0	0	0	0	0	0	1
JHI-Hv50k-2016-347866	0	1	1	1	0	1	1	0	0	1	1	0	1	1	0	1	0	1	1	0	1	0	0	0	1	1	0	0	1	0	1	0	0	1	1	0	0	1	0	1	0	1	0	0	0	0	0	0	1
JHI-Hv50k-2016-348033	0	1	1	1	0	1	1	0	0	1	1	0	1	1	0	1	0	1	1	0	1	0	0	0	1	1	0	0	1	0	1	0	0	1	1	0	0	1	0	1	0	1	0	0	0	0	0	0	1
JHI-Hv50k-2016-348257	0	1	1	1	0	1	1	0	0	1	1	0	1	1	0	1	0	1	1	0	1	0	0	0	1	1	0	0	1	0	1	0	0	1	1	0	0	1	0	1	0	1	0	0	0	0	0	0	1
JHI-Hv50k-2016-348345	0	1	1	1	0	1	1	0	0	1	1	0	1	1	0	1	0	1	1	0	1	0	0	0	1	1	0	0	1	0	1	0	0	1	1	0	0	1	0	1	0	1	0	0	0	0	0	0	1
JHI-Hv50k-2016-348405	0	1	1	1	0	1	1	0	0	1	1	0	1	1	0	1	0	1	1	0	1	0	0	0	1	1	0	0	1	0	1	0	0	1	1	0	0	1	0	1	0	1	0	0	0	0	0	0	1
JHI-Hv50k-2016-348621	0	1	1	1	0	1	1	0	0	1	1	0	1	1	0	1	0	1	1	0	1	0	0	0	1	1	0	0	1	0	1	0	0	1	1	0	0	1	0	1	0	1	0	0	0	0	0	0	1
JHI-Hv50k-2016-350540	0	1	1	1	0	1	1	0	1	1	1	0	1	1	0	1	0	1	1	1	1	0	0	0	1	1	0	1	0	0	1	0	0	1	1	0	3	1	0	1	0	1	0	0	0	0	0	0	1
JHI-Hv50k-2016-350801	0	1	1	1	0	1	0	0	1	1	1	0	1	1	0	1	0	1	1	1	1	0	0	0	1	1	0	1	0	0	1	0	0	1	1	0	3	0	0	1	0	1	0	0	0	0	0	0	1
JHI-Hv50k-2016-351353	0	1	1	1	0	1	0	0	1	1	1	0	1	1	0	1	0	1	1	1	1	0	0	0	1	1	0	1	0	0	1	0	0	1	1	0	3	0	0	1	0	1	0	0	0	0	0	0	1
JHI-Hv50k-2016-352376	0	1	1	1	0	1	0	0	1	1	1	0	1	0	0	1	0	1	1	1	1	0	0	0	1	1	0	1	0	0	1	0	0	1	1	0	3	0	0	1	0	1	0	0	0	0	0	0	1
JHI-Hv50k-2016-352989	0	1	1	1	0	1	0	0	1	1	1	0	1	0	0	1	0	1	1	1	1	0	0	0	1	1	0	1	0	0	1	0	0	1	1	0	1	0	0	1	0	1	0	0	0	0	0	0	1
JHI-Hv50k-2016-354659	0	1	1	1	0	1	0	0	1	0	1	0	1	0	0	1	0	1	1	1	1	0	0	0	1	1	0	1	0	0	1	0	0	1	1	0	1	0	0	1	0	1	0	0	0	0	0	0	1
SCRI-RS-12757	0	1	1	1	0	1	0	0	1	0	1	0	1	0	0	1	0	1	1	1	1	0	0	0	1	1	0	1	0	0	1	0	0	1	1	0	1	0	0	1	0	1	0	0	0	0	0	0	1
JHI-Hv50k-2016-355011	0	1	1	1	0	1	0	0	1	0	1	0	1	0	0	1	0	1	1	1	1	0	0	0	1	1	0	1	0	0	1	0	0	1	1	1	1	0	0	1	0	1	0	0	0	0	0	0	1
JHI-Hv50k-2016-355052	0	1	1	1	0	1	0	0	1	0	1	0	1	0	0	1	0	1	1	1	1	0	0	0	1	1	0	1	0	0	1	0	0	1	1	1	1	0	0	1	0	1	0	0	0	0	0	0	1
JHI-Hv50k-2016-355148	0	1	1	1	0	1	0	0	1	0	1	0	1	0	0	1	0	1	1	1	1	0	0	0	1	1	0	1	0	0	1	0	0	1	1	1	1	0	0	1	0	1	0	0	0	0	0	0	1
JHI-Hv50k-2016-355620	0	1	1	1	0	1	0	0	1	0	1	0	1	0	0	1	0	1	1	1	1	0	0	0	1	1	1	1	0	0	1	0	0	1	1	1	1	0	0	1	0	1	0	0	0	0	0	0	1
JHI-Hv50k-2016-355798	0	1	1	1	0	1	0	0	1	0	1	0	1	0	0	1	0	1	1	1	1	0	0	0	1	1	1	1	0	0	1	0	0	1	1	1	1	0	0	1	0	1	0	0	0	0	0	0	1
JHI-Hv50k-2016-355845	0	1	1	1	0	1	0	0	1	0	1	0	1	0	0	1	0	1	1	1	1	0	0	0	1	1	1	1	0	0	1	0	0	1	1	1	1	0	0	1	0	1	0	0	0	0	0	0	1
JHI-Hv50k-2016-357186	0	1	1	1	0	1	0	0	1	0	1	0	1	0	0	1	0	1	1	1	1	0	0	0	1	1	1	1	0	0	1	0	1	1	1	1	1	0	0	1	0	1	0	0	0	0	0	0	1
JHI-Hv50k-2016-357474	0	1	1	1	0	1	0	0	1	0	1	0	1	0	0	1	0	1	1	1	0	0	0	0	1	1	1	1	0	0	1	0	1	1	1	1	1	0	0	1	0	1	0	0	0	0	0	0	1
JHI-Hv50k-2016-357548	0	1	1	1	0	1	0	0	1	0	1	0	1	0	0	1	0	1	1	1	0	0	0	0	1	1	1	1	0	0	1	0	1	1	1	1	1	0	0	1	0	1	0	0	0	0	0	0	1
JHI-Hv50k-2016-357638	0	1	1	1	0	1	0	0	1	0	1	0	1	0	0	1	0	1	1	1	0	0	0	0	1	1	1	1	0	0	1	0	1	1	1	1	1	0	0	1	0	1	0	0	0	0	0	0	0
JHI-Hv50k-2016-358019	0	1	1	1	0	1	0	0	1	0	0	0	1	0	0	1	0	1	1	1	0	0	0	0	1	1	1	1	0	0	1	0	1	1	1	1	1	0	0	1	0	1	0	0	0	0	0	0	0
JHI-Hv50k-2016-358085	0	1	1	1	0	1	0	0	1	0	0	0	1	0	0	1	0	1	1	1	0	0	0	0	0	1	1	1	0	0	1	0	1	1	1	1	1	0	0	1	0	1	0	0	0	0	0	0	0
JHI-Hv50k-2016-358581	0	1	1	1	0	1	0	0	1	0	0	0	1	0	0	1	0	1	1	1	0	0	0	0	0	1	1	1	0	0	1	0	1	1	1	1	1	0	0	1	0	1	0	0	0	0	0	0	0
JHI-Hv50k-2016-358922	0	1	1	1	0	1	0	0	1	0	0	0	1	0	0	1	0	1	1	1	0	0	0	0	1	1	1	1	0	0	1	0	1	1	1	1	1	0	0	1	0	1	0	0	0	0	0	0	0
JHI-Hv50k-2016-359473	0	1	1	1	0	1	0	0	1	0	0	0	1	0	0	1	0	1	1	1	0	0	0	0	3	1	1	1	0	0	1	0	1	1	1	1	1	0	0	1	0	1	0	0	0	0	0	0	0
JHI-Hv50k-2016-360277	0	1	1	1	0	1	0	0	1	0	0	0	1	0	0	1	0	1	1	1	0	0	0	0	3	1	1	1	0	0	1	0	1	1	1	1	1	0	0	1	0	1	0	0	1	0	0	0	0
JHI-Hv50k-2016-360994	0	1	1	1	0	1	0	0	1	0	0	0	1	0	0	1	0	0	1	1	0	0	0	0	3	1	1	1	0	0	1	0	1	1	1	1	1	0	0	1	0	1	0	0	1	0	0	0	0
JHI-Hv50k-2016-361316	0	1	1	1	0	1	0	0	1	0	0	0	1	0	0	1	0	0	1	1	0	0	0	0	3	1	1	1	0	0	1	0	1	1	1	1	1	0	0	1	0	1	0	0	1	0	0	0	0
JHI-Hv50k-2016-361989	0	1	1	1	0	1	0	0	1	0	0	0	0	0	0	1	0	0	1	1	0	0	0	0	3	1	1	1	0	0	1	0	1	1	1	1	1	0	0	1	0	1	0	0	1	0	0	0	0
JHI-Hv50k-2016-362167	0	1	1	1	0	1	0	0	1	0	0	0	0	0	0	1	0	0	1	1	0	0	0	0	3	1	1	1	0	0	1	0	1	1	1	1	1	0	0	1	0	1	0	0	1	0	0	0	0
JHI-Hv50k-2016-362291	0	1	1	1	0	1	0	0	1	0	0	0	0	0	0	1	0	0	1	1	0	0	0	0	3	1	1	1	0	0	1	0	1	1	1	1	1	0	0	1	0	1	0	0	1	0	0	0	0
JHI-Hv50k-2016-363828	0	1	1	1	0	1	0	0	1	0	0	0	0	0	0	1	0	0	1	1	0	0	0	0	3	1	1	1	0	0	1	0	1	1	1	1	1	0	0	1	0	1	0	0	1	0	0	0	0
JHI-Hv50k-2016-364347	0	1	1	1	0	1	0	0	1	0	0	0	0	0	0	1	0	0	1	1	0	0	0	0	3	1	1	1	0	0	1	0	1	1	1	1	1	0	0	1	0	1	0	0	1	0	0	0	0
JHI-Hv50k-2016-365175	0	1	1	1	0	1	0	0	1	0	0	0	0	0	0	1	0	0	1	1	0	0	0	0	3	1	1	1	0	0	1	0	1	1	1	1	1	0	1	1	0	1	0	0	1	0	0	0	0
JHI-Hv50k-2016-366123	0	1	1	1	0	1	0	0	1	0	0	0	0	0	0	1	0	0	1	1	0	0	0	0	3	1	1	1	0	0	1	0	1	1	1	1	1	0	1	1	0	1	0	0	1	0	0	0	0
JHI-Hv50k-2016-367376	0	1	1	1	0	1	0	0	1	0	0	0	0	0	0	1	0	0	1	1	0	0	0	0	3	1	1	1	0	0	1	0	1	1	1	1	1	0	1	1	0	1	0	0	1	0	0	0	0
JHI-Hv50k-2016-367738	0	1	1	1	0	1	0	0	1	0	0	0	0	0	0	1	0	0	1	1	0	0	0	0	3	1	1	1	0	0	1	0	1	1	1	1	1	0	1	1	0	1	0	0	1	0	0	0	0
JHI-Hv50k-2016-367933	0	1	0	1	1	0	0	1	1	1	1	0	1	0	1	1	1	0	0	1	1	0	1	0	1	0	0	1	1	0	0	1	0	0	1	1	1	0	1	1	1	0	0	0	1	1	0	0	1
JHI-Hv50k-2016-368411	0	1	0	1	1	0	0	1	1	1	1	0	1	0	1	1	1	0	0	1	1	0	1	0	1	0	0	1	1	0	0	1	0	0	1	1	1	0	1	1	1	1	0	0	1	1	0	0	1
JHI-Hv50k-2016-368775	0	1	0	1	1	0	0	1	1	1	1	0	1	0	1	1	1	0	0	1	1	0	1	0	0	0	0	1	1	0	0	1	0	0	1	1	1	0	1	1	1	1	0	0	1	1	0	0	1
JHI-Hv50k-2016-368750	0	1	0	1	1	0	0	1	1	1	1	0	1	0	1	1	1	0	0	1	1	0	1	0	0	0	0	1	1	0	0	1	0	0	1	1	1	0	1	1	1	0	0	0	1	1	0	0	1
JHI-Hv50k-2016-369161	0	1	0	1	1	0	0	0	1	1	1	0	1	0	1	1	1	0	0	1	1	0	1	0	1	0	0	1	1	0	0	0	0	0	1	1	1	0	1	1	1	0	0	0	1	1	0	0	1
JHI-Hv50k-2016-369951	0	1	0	1	1	0	0	0	1	1	1	0	1	0	1	1	1	0	0	1	1	0	1	0	1	0	0	1	1	0	0	0	0	0	1	1	1	0	1	1	1	0	0	0	1	1	0	0	1
JHI-Hv50k-2016-370322	0	1	0	1	1	0	0	0	1	1	1	0	1	0	1	1	1	0	0	1	1	0	1	0	1	0	0	1	1	0	0	1	0	0	1	1	1	0	1	1	1	0	0	0	1	1	0	0	1
JHI-Hv50k-2016-370455	0	1	0	1	1	0	0	1	1	1	1	0	1	0	1	1	1	0	0	1	1	0	1	0	1	0	0	1	1	0	0	1	0	0	1	1	1	0	1	1	1	0	0	0	1	1	0	0	1
BOPA1-ABC25019-1-8-280	0	1	0	1	1	0	0	1	1	1	1	0	1	0	1	1	1	0	0	1	1	0	1	0	0	0	0	1	0	0	0	1	0	0	1	1	1	0	1	1	1	0	0	1	1	1	0	0	1
SCRI-RS-211856	0	1	0	1	1	0	0	1	1	1	1	0	1	0	0	1	1	0	0	1	1	0	1	0	0	0	0	1	0	0	0	1	0	0	1	1	1	0	1	1	1	0	0	1	1	1	0	0	1
JHI-Hv50k-2016-371705	0	1	0	1	1	0	0	1	1	1	1	0	1	0	0	1	1	0	0	1	1	1	1	0	0	0	0	1	0	0	0	1	0	0	1	1	1	0	1	1	1	0	0	1	1	1	0	0	1
JHI-Hv50k-2016-372059	0	1	0	1	1	0	0	1	1	1	1	0	1	0	0	1	1	0	0	1	1	1	1	0	0	0	0	1	0	0	0	0	0	0	1	1	1	0	1	0	1	0	0	1	1	1	0	0	1
JHI-Hv50k-2016-372773	0	1	0	1	1	0	0	1	1	1	1	0	1	0	0	1	1	0	0	1	1	1	1	0	0	0	0	1	0	0	0	0	0	0	1	1	1	0	1	0	1	1	0	1	1	1	0	0	1
JHI-Hv50k-2016-372938	0	1	0	1	1	0	0	1	1	1	1	0	1	0	0	1	1	0	0	1	1	1	1	0	0	0	0	1	0	0	0	0	0	0	1	1	1	0	1	0	1	1	0	1	1	1	0	0	1
BOPA1-5993-2383	0	1	0	1	1	0	0	1	1	1	1	0	1	0	0	1	1	0	0	1	1	1	1	0	0	0	0	1	0	0	0	0	0	0	1	1	1	0	1	1	1	1	0	1	1	1	0	0	1
JHI-Hv50k-2016-372999	0	1	0	1	1	0	0	1	1	1	1	0	1	0	0	1	1	0	0	1	1	1	1	1	0	0	0	1	0	0	0	0	0	0	1	1	1	0	1	1	1	1	0	1	1	1	0	0	1
JHI-Hv50k-2016-373396	0	1	0	1	1	0	0	1	1	1	1	0	1	0	0	1	1	0	0	1	1	1	1	1	0	0	0	1	0	0	0	0	0	0	1	1	1	0	1	1	1	0	0	1	1	1	0	0	1
JHI-Hv50k-2016-373479	0	1	0	1	1	0	0	1	1	1	1	0	1	0	0	1	1	0	0	1	1	1	1	1	0	0	0	1	0	0	0	0	0	0	1	1	1	0	1	1	1	0	0	1	1	1	0	0	1
JHI-Hv50k-2016-373554	0	1	0	1	1	0	0	1	1	1	1	0	1	0	0	1	1	0	0	1	1	1	1	1	0	0	0	0	0	0	0	0	0	0	1	1	1	0	1	1	1	0	0	1	1	1	0	0	1
JHI-Hv50k-2016-373654	0	1	0	1	1	0	0	1	1	1	1	0	1	0	0	1	1	0	0	1	1	1	1	1	0	0	0	1	0	0	0	0	0	0	1	1	1	0	1	1	1	0	0	1	1	1	0	0	1
JHI-Hv50k-2016-373745	0	1	0	1	1	0	0	1	1	1	1	0	1	0	0	1	1	0	0	1	0	1	1	1	0	0	0	0	0	0	0	0	0	0	1	1	1	0	1	1	1	0	0	1	1	1	0	1	1
JHI-Hv50k-2016-373942	0	1	0	1	1	0	0	1	1	1	1	0	1	0	0	1	1	0	0	1	1	1	1	1	0	0	0	0	0	0	0	0	0	0	1	1	1	0	1	1	1	0	0	1	1	1	0	0	1
JHI-Hv50k-2016-374148	0	1	0	1	1	0	0	1	1	1	1	0	1	0	0	1	1	0	0	1	0	1	1	1	0	0	0	0	0	0	0	0	0	0	1	1	1	0	1	1	1	0	0	1	1	1	0	1	1
JHI-Hv50k-2016-375644	0	1	0	1	1	0	0	1	1	1	1	0	1	0	0	1	1	0	0	1	0	1	1	1	0	0	0	0	0	0	0	0	0	0	1	1	1	0	1	1	1	0	0	1	1	1	0	1	1
JHI-Hv50k-2016-375790	0	1	0	1	1	0	0	1	1	1	1	0	1	0	0	1	1	0	0	1	0	1	1	1	0	0	0	0	0	0	0	0	1	0	1	1	1	0	1	1	1	0	0	1	1	1	0	1	1
JHI-Hv50k-2016-376061	0	1	0	1	1	0	0	1	1	1	1	1	1	0	0	1	1	0	0	1	0	1	1	1	0	0	0	0	0	0	0	0	1	0	1	1	1	0	1	1	1	0	0	1	1	1	0	1	1
JHI-Hv50k-2016-376441	0	1	0	1	1	0	0	1	1	1	1	1	1	0	1	1	1	0	0	1	0	1	1	1	0	0	0	0	0	0	0	0	1	0	1	1	1	0	1	1	1	0	0	1	1	1	0	1	1
JHI-Hv50k-2016-376707	0	1	0	1	1	0	0	1	1	1	1	1	1	0	1	1	1	0	0	1	0	1	1	1	0	0	0	0	0	0	1	0	1	0	1	1	1	0	1	1	1	0	0	1	1	1	0	1	1
JHI-Hv50k-2016-376871	0	1	0	1	1	0	0	1	1	1	1	1	1	0	1	1	1	0	0	1	0	1	1	1	0	0	0	0	0	0	1	0	1	0	1	1	1	0	1	1	1	0	0	1	1	1	0	1	1
JHI-Hv50k-2016-377159	0	1	0	1	0	0	0	1	1	1	1	1	1	0	1	1	1	0	0	1	0	1	1	1	0	0	0	0	0	0	1	0	1	0	1	1	1	0	1	1	1	0	0	1	1	1	0	1	1
JHI-Hv50k-2016-377672	0	1	0	1	0	0	0	1	0	1	1	1	1	1	1	1	1	0	0	1	0	1	1	1	0	0	0	0	0	0	1	0	1	0	1	1	1	0	1	1	1	0	0	1	1	1	0	1	1
JHI-Hv50k-2016-377677	0	1	0	1	0	0	0	1	0	1	1	1	1	3	1	1	1	0	0	1	0	1	1	1	0	0	0	0	0	0	1	0	1	0	1	1	1	0	1	1	1	0	0	1	1	1	0	1	1
JHI-Hv50k-2016-377566	0	1	0	1	0	0	0	1	0	1	1	1	1	3	1	1	1	0	0	1	0	1	1	1	0	0	0	0	0	0	1	0	1	0	1	1	1	0	1	1	1	0	0	1	1	1	0	1	1
JHI-Hv50k-2016-378008	0	1	3	1	0	0	0	1	0	1	1	1	0	3	1	1	1	0	0	1	0	1	1	1	3	1	0	0	0	0	1	0	1	0	1	0	1	0	1	1	1	0	0	1	1	1	0	1	1
JHI-Hv50k-2016-378295	0	1	0	1	0	0	0	1	0	1	1	1	0	0	1	1	1	0	0	1	0	0	0	1	3	1	0	0	0	0	1	0	1	0	1	0	1	0	1	1	1	1	0	1	1	1	0	1	1
JHI-Hv50k-2016-378881	0	1	0	1	0	0	0	1	0	1	1	1	0	0	1	1	1	0	0	1	0	0	0	1	3	1	0	0	0	0	1	0	1	0	1	0	1	0	1	1	1	1	0	1	1	1	0	1	1
JHI-Hv50k-2016-379030	0	1	0	1	0	0	0	1	0	1	1	1	0	0	1	1	1	0	0	1	0	0	0	1	1	1	0	0	0	0	1	0	1	0	1	0	1	0	1	1	1	1	0	1	1	1	0	1	1
JHI-Hv50k-2016-379181	0	1	0	1	0	0	0	1	0	1	1	1	0	0	1	1	1	0	0	1	0	0	0	1	3	1	0	0	0	0	1	0	1	0	1	0	1	0	1	1	1	1	0	1	1	1	0	1	1
JHI-Hv50k-2016-379197	0	1	0	1	0	0	0	1	0	1	1	1	0	0	0	1	1	0	0	1	0	0	0	1	3	1	0	0	0	0	1	0	1	0	1	0	1	0	1	1	1	1	0	1	1	1	0	1	1
JHI-Hv50k-2016-379211	0	1	0	1	0	0	0	1	0	1	1	1	0	0	0	1	1	0	0	1	0	0	0	1	3	1	0	0	0	1	1	0	1	0	1	0	1	0	1	1	1	1	0	1	1	1	0	1	1
JHI-Hv50k-2016-379274	0	1	0	1	0	0	0	1	0	1	1	1	0	0	0	1	1	0	0	1	0	0	0	1	3	1	0	0	0	1	1	0	1	0	1	0	1	0	1	1	1	1	0	1	1	1	0	1	1
JHI-Hv50k-2016-379329	0	1	0	1	0	0	0	1	0	1	1	1	0	0	0	1	1	0	0	1	0	0	0	1	3	1	0	0	0	1	1	0	1	0	1	0	1	0	1	1	1	1	0	1	1	1	0	1	1
JHI-Hv50k-2016-379530	0	1	0	1	0	0	0	1	0	1	1	1	0	0	0	1	1	0	0	1	0	0	0	1	3	1	0	0	0	1	1	0	0	0	1	1	1	0	1	1	1	1	0	1	1	1	0	1	1
BOPA2-12-31485	0	1	0	1	0	0	0	1	0	1	1	1	0	0	0	1	1	0	0	1	0	0	0	1	3	1	0	0	0	1	1	0	0	0	1	1	1	0	1	1	1	1	0	1	1	1	0	1	1
JHI-Hv50k-2016-379784	0	1	0	1	0	0	0	1	0	1	1	1	0	0	0	1	1	0	0	1	0	0	0	1	3	1	0	0	0	1	1	0	0	0	1	1	1	0	3	1	1	1	0	1	1	1	0	1	1
JHI-Hv50k-2016-379948	0	1	0	1	0	0	0	1	0	1	1	1	0	0	0	1	1	0	0	1	0	0	0	1	3	1	0	0	0	1	1	0	0	1	1	1	1	0	3	1	1	1	0	1	1	0	0	1	1
JHI-Hv50k-2016-380476	0	1	0	1	0	0	0	1	0	1	1	1	0	0	0	1	1	0	0	1	0	0	0	1	3	1	0	0	0	1	1	0	0	1	1	1	1	0	3	1	1	1	0	1	1	0	0	1	1
JHI-Hv50k-2016-380911	0	1	0	1	0	0	3	1	0	1	1	1	0	0	0	1	1	0	0	1	0	0	0	1	3	1	0	0	0	1	1	0	0	1	1	1	1	0	3	1	1	1	0	1	1	0	0	1	1
JHI-Hv50k-2016-380946	0	1	0	0	0	0	3	1	0	1	1	1	0	0	0	1	1	0	0	1	0	0	0	1	3	1	0	0	0	1	1	0	0	1	1	1	0	0	3	1	1	1	0	1	1	0	0	1	1
BOPA2-12-30361	0	1	0	0	0	0	3	1	0	1	1	1	0	0	0	1	1	0	0	1	0	1	0	1	3	1	0	0	0	1	1	0	0	1	1	1	0	0	3	1	1	1	0	1	1	0	0	1	1
JHI-Hv50k-2016-382199	0	1	0	0	0	0	3	1	0	1	1	1	0	0	0	1	1	0	0	1	0	1	0	1	3	1	0	0	0	1	1	0	0	1	1	1	0	0	3	1	1	1	0	1	1	0	0	1	1
JHI-Hv50k-2016-382495	0	1	0	0	0	0	3	1	0	1	1	1	0	0	0	1	1	0	0	1	0	1	0	1	3	1	0	0	0	1	1	0	0	1	1	1	0	0	3	1	1	1	0	1	1	0	0	1	1
JHI-Hv50k-2016-382546	0	1	0	0	0	0	3	1	0	1	1	1	0	0	0	1	1	0	0	1	0	1	0	1	3	1	0	0	0	1	1	0	0	1	1	1	0	0	3	1	1	1	0	1	1	0	0	1	1
JHI-Hv50k-2016-383147	0	1	0	0	0	0	3	1	0	0	1	1	0	0	0	1	1	0	0	1	0	1	0	1	3	1	0	0	0	1	1	0	0	1	1	1	0	0	0	1	1	1	0	1	1	0	0	1	1
SCRI-RS-102426	0	1	0	0	0	0	3	1	0	0	1	1	0	0	0	1	1	0	0	1	0	1	0	1	3	1	0	0	0	1	1	0	0	1	1	1	0	0	3	1	1	1	0	1	1	0	0	1	1
JHI-Hv50k-2016-383447	0	1	0	0	0	0	3	1	0	1	1	1	0	0	0	1	1	0	0	1	0	1	0	1	3	1	0	0	0	1	1	0	0	1	1	1	0	0	3	1	1	1	0	1	1	0	0	1	1
SCRI-RS-168118	0	1	0	0	0	0	3	1	0	1	1	1	0	0	0	1	1	0	0	1	0	1	0	1	3	1	0	0	0	1	1	0	0	1	1	1	0	0	3	1	1	1	0	1	1	0	0	1	1
JHI-Hv50k-2016-383787	0	1	0	0	1	0	3	1	0	1	1	1	0	0	0	1	1	0	0	1	0	1	0	1	3	1	0	0	0	1	1	0	1	1	1	1	0	0	3	1	1	1	0	1	1	0	1	1	1
SCRI-RS-162581	0	1	0	0	1	1	3	1	0	1	1	1	0	0	0	1	1	0	1	1	0	1	0	1	3	1	0	0	0	1	1	0	1	1	1	1	0	0	3	1	1	1	0	1	1	0	1	1	1
JHI-Hv50k-2016-384979	0	1	0	0	1	1	3	1	0	1	1	1	0	0	0	1	1	0	1	1	0	1	0	1	3	1	0	0	0	1	1	0	1	1	1	1	0	0	3	1	1	1	0	1	1	0	1	1	1
JHI-Hv50k-2016-385826	0	1	0	0	1	1	3	1	0	1	1	1	0	0	0	1	1	0	1	1	0	1	0	1	0	1	0	0	0	1	1	0	1	1	1	1	0	0	3	1	1	1	0	1	1	0	1	1	0
BOPA1-2041-1317	0	1	0	0	1	1	3	1	0	1	1	1	0	0	0	1	1	0	1	1	0	1	0	1	0	1	0	0	0	1	1	0	1	1	1	1	0	0	3	1	1	1	0	1	1	0	1	1	0
SCRI-RS-9980	0	1	0	0	1	1	3	1	0	1	1	1	0	0	0	1	1	0	1	1	0	1	0	1	0	1	0	0	0	1	1	0	1	1	1	1	0	0	3	1	1	1	0	1	1	0	1	1	0
JHI-Hv50k-2016-393145	0	1	0	0	1	1	3	1	0	1	1	1	0	0	0	1	1	0	1	1	0	1	0	1	0	1	0	0	0	1	1	0	1	1	1	1	0	0	3	1	1	1	0	1	1	0	1	1	0
JHI-Hv50k-2016-393168	0	1	0	0	1	1	3	1	0	1	1	1	0	0	1	1	1	0	1	1	0	1	0	1	0	1	0	0	0	1	1	0	1	1	1	1	0	0	3	1	1	1	0	1	1	0	1	1	0
BOPA1-397-288	0	1	0	0	1	1	3	1	0	1	1	1	0	0	0	1	1	0	1	1	0	1	0	1	0	1	0	0	0	1	1	0	1	1	1	1	0	0	3	1	1	1	0	1	1	0	1	1	0
JHI-Hv50k-2016-394764	0	1	0	0	1	1	3	1	0	1	1	1	0	0	0	1	1	0	1	1	0	1	0	1	0	1	0	0	0	1	1	0	1	1	1	1	0	0	0	1	1	1	0	1	1	0	1	1	0
SCRI-RS-169672	0	1	0	0	1	1	3	1	0	1	1	1	0	0	0	1	1	0	1	1	0	1	0	1	3	1	0	0	0	1	1	0	1	1	1	1	0	0	3	1	1	1	0	1	1	0	1	1	0
SCRI-RS-209993	0	1	0	0	1	1	3	1	0	1	1	1	0	0	0	1	1	0	1	1	0	1	0	1	3	1	0	0	0	1	1	0	1	1	1	1	0	0	3	1	1	1	0	1	1	0	1	1	0
JHI-Hv50k-2016-407107	0	1	0	0	1	1	0	1	0	1	1	1	0	0	0	1	1	0	1	1	0	1	0	1	3	1	0	0	0	1	1	0	1	1	1	1	0	0	3	1	1	1	0	1	1	0	1	1	0
JHI-Hv50k-2016-407207	0	1	0	0	1	1	0	1	0	1	1	1	0	0	0	1	1	0	1	1	0	1	0	1	3	1	0	0	0	1	1	0	1	1	1	1	0	0	3	1	1	1	0	1	1	0	1	1	0
JHI-Hv50k-2016-407217	0	1	0	0	1	1	0	1	0	1	1	1	0	0	0	1	1	0	1	1	0	1	0	1	3	1	0	0	0	1	1	0	1	1	1	1	0	0	3	1	1	1	0	1	1	0	1	1	0
BOPA1-8048-952	0	1	0	0	1	1	0	1	0	1	1	1	0	0	0	1	1	0	1	1	0	1	0	1	3	1	0	0	0	1	1	0	1	1	1	1	0	0	3	1	1	1	0	1	1	0	1	1	0
BOPA1-8005-914	0	1	0	0	1	1	0	1	0	1	1	1	0	0	0	1	1	0	1	1	0	1	0	1	3	1	0	0	0	1	1	0	1	1	1	1	0	0	3	1	1	1	0	1	1	0	1	1	0
SCRI-RS-219632	0	1	0	0	1	1	0	1	0	1	1	1	0	0	0	1	1	0	1	1	0	1	0	1	1	1	0	0	0	1	1	0	1	1	1	1	0	0	3	1	1	1	0	1	1	0	1	1	0
SCRI-RS-165986	0	1	0	0	1	1	0	1	0	1	1	1	0	1	0	1	1	0	1	1	0	1	0	1	1	1	0	0	0	1	1	0	1	1	1	1	0	0	3	1	1	1	0	1	1	0	1	1	0
SCRI-RS-5787	0	1	0	0	1	1	0	1	0	1	1	1	0	1	0	1	1	0	1	1	0	1	0	1	1	1	0	0	0	1	1	0	1	1	1	1	0	0	3	1	1	1	0	1	1	0	1	1	0
BOPA1-1096-1482	0	1	0	0	1	1	0	1	0	1	1	1	0	1	0	1	1	0	1	1	0	1	0	1	1	1	0	0	0	1	1	0	1	1	1	1	0	0	1	1	1	1	0	1	1	0	1	1	0
SCRI-RS-205971	0	1	0	0	1	1	0	1	0	1	1	1	0	0	0	1	1	0	1	1	0	1	0	1	1	1	0	0	0	1	1	0	1	1	0	1	0	0	1	1	1	1	0	1	1	0	1	1	0
JHI-Hv50k-2016-413434	0	1	0	0	1	1	0	1	0	1	1	1	0	0	0	1	1	0	1	1	0	1	0	1	0	1	0	0	0	1	1	0	1	1	0	1	0	0	1	1	1	1	0	1	1	0	1	1	0
JHI-Hv50k-2016-413704	0	1	0	0	1	1	0	1	0	1	1	1	0	0	0	1	1	0	1	1	0	1	0	1	0	1	0	0	0	1	1	0	1	1	0	1	0	0	1	1	1	1	0	1	1	0	1	1	0
SCRI-RS-228493	0	1	0	0	1	1	0	1	0	1	1	1	0	0	0	1	1	0	1	1	0	1	0	1	0	1	0	0	0	1	1	0	1	1	0	1	0	0	1	1	1	1	0	1	1	0	1	1	0
SCRI-RS-207284	0	1	0	0	1	1	0	1	0	1	1	1	0	0	0	1	1	1	1	1	0	1	0	1	0	1	0	0	0	1	1	0	1	1	0	1	0	0	1	1	0	1	0	1	1	0	1	1	0
SCRI-RS-217187	0	1	0	0	1	1	0	1	0	1	1	1	0	0	0	1	1	1	1	1	0	1	0	1	0	1	0	0	0	1	1	0	1	1	0	1	0	0	1	1	0	1	0	1	1	0	1	1	0
SCRI-RS-238393	0	1	0	0	1	1	0	1	0	1	1	1	0	0	0	1	1	1	1	1	1	1	0	1	0	1	0	0	0	1	1	0	1	1	0	1	0	0	1	1	0	1	0	1	1	0	1	1	0
SCRI-RS-170674	0	1	0	0	1	1	0	1	0	1	1	1	0	0	0	1	1	1	1	1	1	1	0	1	0	1	0	0	0	1	1	0	1	1	0	1	0	0	1	1	0	1	0	1	1	0	1	1	0
SCRI-RS-153166	0	1	0	0	1	1	0	1	0	1	1	1	0	0	1	0	1	1	1	1	1	1	0	1	0	1	0	0	0	0	1	0	1	1	0	1	0	0	1	1	0	1	0	1	1	0	1	1	0
JHI-Hv50k-2016-416678	0	1	0	0	1	1	0	1	0	1	1	1	0	0	1	0	1	1	1	1	1	1	0	1	0	1	0	1	0	0	1	0	1	1	0	1	0	0	1	1	0	1	0	1	1	0	1	1	0
SCRI-RS-736	0	1	0	0	1	1	0	1	0	1	1	1	0	1	1	0	1	1	1	1	1	1	0	1	0	1	0	1	0	0	1	0	1	1	0	1	0	0	1	1	0	1	0	1	1	0	1	1	0
SCRI-RS-167497	0	1	0	0	1	1	0	1	0	1	0	1	0	1	1	0	1	1	1	1	1	1	0	1	0	1	0	1	0	0	1	0	1	1	0	1	0	0	1	1	0	1	0	1	1	0	1	1	0
JHI-Hv50k-2016-418570	0	1	0	0	1	1	0	1	0	0	0	1	0	1	1	0	1	1	1	1	1	0	0	1	0	1	0	1	0	0	1	1	1	1	0	1	0	0	1	1	0	1	0	1	1	1	1	1	0
JHI-Hv50k-2016-419085	0	1	0	0	1	0	0	1	0	0	0	1	0	1	1	0	1	1	1	1	1	0	0	1	0	1	0	1	0	0	1	1	1	1	0	1	0	0	1	1	0	1	1	1	1	1	1	1	0
BOPA2-12-31432	0	1	0	0	1	0	0	1	0	0	0	1	0	1	1	0	1	1	1	1	1	0	0	1	0	1	0	1	0	0	1	1	1	1	1	1	0	0	1	1	0	1	1	1	1	1	1	1	0
JHI-Hv50k-2016-419303	0	1	0	0	1	0	0	1	0	0	0	0	0	1	1	0	1	1	1	1	1	0	0	1	0	1	0	1	0	0	1	1	1	1	1	1	0	0	1	1	0	1	1	1	1	1	1	1	0
JHI-Hv50k-2016-419579	0	1	0	0	1	0	0	1	0	0	0	0	0	1	1	0	1	1	1	1	1	0	0	1	0	1	0	1	0	0	1	1	1	1	1	1	0	0	1	1	0	1	1	1	1	1	1	1	0
SCRI-RS-124224	0	1	0	0	1	0	0	1	0	0	0	0	0	1	1	0	1	1	1	1	1	0	0	1	0	1	0	1	0	0	1	1	1	1	1	1	0	0	1	1	0	1	1	1	1	1	1	1	0
JHI-Hv50k-2016-420036	0	1	0	0	1	0	0	1	0	0	0	0	0	1	1	0	1	1	1	1	1	0	0	1	0	1	0	1	0	0	1	1	1	1	1	1	1	0	1	1	0	1	1	1	1	1	1	1	0
BOPA1-5124-1707	0	1	0	0	1	0	0	1	0	0	0	0	0	1	1	0	1	1	1	1	1	0	0	1	0	1	0	1	0	0	1	1	1	1	1	1	1	0	1	1	0	1	1	1	1	1	1	1	0
JHI-Hv50k-2016-420408	0	1	0	0	1	0	0	1	0	0	0	0	0	1	1	0	1	1	1	1	1	0	0	1	0	1	0	1	0	0	1	1	1	0	1	1	1	0	1	1	0	1	1	1	1	1	1	1	0
JHI-Hv50k-2016-421152	0	1	0	0	1	0	0	1	0	0	0	0	0	1	1	0	1	1	1	1	1	0	0	1	0	1	0	1	0	0	1	1	1	0	1	1	1	0	0	1	0	1	1	1	1	1	1	1	1
JHI-Hv50k-2016-421248	0	1	1	0	1	0	0	1	0	0	0	0	0	1	1	0	1	1	1	1	1	0	0	1	0	1	0	1	0	0	1	1	1	0	1	1	1	0	0	1	0	1	1	1	0	1	1	1	1
JHI-Hv50k-2016-421340	0	1	1	0	1	0	0	1	0	0	0	0	0	1	1	0	1	1	1	1	1	0	0	1	0	1	0	1	0	0	1	1	1	0	1	1	1	0	0	1	0	1	1	1	0	1	1	1	1
SCRI-RS-223732	0	1	1	0	1	0	0	1	0	0	0	0	0	1	1	0	1	1	1	1	1	0	0	1	0	1	0	1	0	0	1	1	1	0	1	1	1	0	1	1	0	1	1	1	0	1	1	1	1
JHI-Hv50k-2016-421777	0	1	1	0	1	0	0	1	0	0	0	0	0	1	1	0	1	1	1	1	1	0	1	1	0	1	0	1	0	0	1	1	1	0	1	1	1	0	1	1	0	1	1	1	0	1	1	1	1
SCRI-RS-202438	0	1	1	0	1	0	0	1	0	0	0	0	0	1	1	0	1	1	1	1	1	0	1	1	0	1	0	1	1	0	1	1	1	0	1	1	1	0	1	1	0	1	1	1	0	1	1	1	1
SCRI-RS-8034	0	1	1	0	1	0	0	1	0	0	0	0	0	1	1	0	1	0	1	1	1	0	1	1	0	1	0	1	1	0	1	1	1	0	1	1	1	0	1	1	0	1	1	1	0	1	1	1	1
JHI-Hv50k-2016-423909	0	1	1	0	1	0	0	1	0	0	0	0	0	1	1	0	1	0	1	1	1	0	1	1	0	1	0	1	1	0	1	1	1	0	1	1	1	0	1	1	0	1	1	1	0	1	1	1	1
JHI-Hv50k-2016-423941	0	1	1	0	1	0	0	1	0	0	0	0	0	1	1	0	1	0	1	1	1	0	1	1	0	1	0	1	1	0	1	1	1	0	1	1	1	0	1	1	0	1	1	1	0	1	1	1	1
JHI-Hv50k-2016-423970	0	1	1	0	1	0	0	1	0	0	0	0	0	1	1	0	3	0	1	1	1	0	1	1	0	1	0	1	1	0	1	1	1	0	1	1	1	0	1	1	0	1	1	1	0	1	1	1	1
JHI-Hv50k-2016-424040	0	1	1	0	1	0	0	1	0	0	0	0	0	1	1	0	3	0	1	1	1	0	1	1	0	1	0	1	1	0	1	1	1	0	1	1	1	0	1	1	0	1	1	1	0	1	1	1	1
JHI-Hv50k-2016-424195	0	1	1	0	1	0	0	1	0	0	0	0	0	1	1	0	3	0	1	1	1	0	1	1	0	1	0	1	1	0	1	1	1	0	1	1	1	0	1	1	0	1	1	1	0	1	1	1	1
JHI-Hv50k-2016-424200	0	1	1	0	1	0	0	1	0	1	0	0	0	1	1	0	3	0	1	1	1	0	1	1	0	1	0	1	1	0	1	1	1	0	1	1	1	0	1	1	0	1	1	1	0	1	1	1	1
SCRI-RS-204188	0	1	1	0	1	0	0	1	0	1	0	0	0	1	1	0	3	0	1	1	1	0	1	1	0	1	0	1	1	0	1	1	1	0	1	1	1	0	1	1	0	1	1	1	0	1	1	1	1
JHI-Hv50k-2016-424445	0	1	1	0	1	0	0	1	0	1	0	0	0	1	1	0	3	0	1	1	1	0	1	1	0	1	0	1	1	0	1	1	1	0	1	1	1	0	1	1	0	1	1	1	0	1	1	1	0
JHI-Hv50k-2016-425821	0	1	1	0	1	0	0	1	0	1	0	0	0	1	1	0	3	0	1	1	1	0	1	1	0	1	0	1	1	0	1	1	1	0	1	1	1	0	1	1	0	1	1	1	0	1	1	1	0
JHI-Hv50k-2016-425908	0	1	1	0	1	0	0	1	0	1	0	0	0	1	1	0	3	0	1	1	1	0	1	1	0	1	0	1	1	0	1	1	1	0	1	1	1	0	1	0	0	1	1	1	0	1	1	1	0
JHI-Hv50k-2016-426124	0	1	1	0	0	0	0	1	0	1	0	0	0	1	1	0	3	0	1	1	1	0	1	1	0	1	0	1	1	0	1	1	1	0	1	1	1	0	1	0	0	1	1	1	0	1	1	1	0
JHI-Hv50k-2016-426454	0	1	1	0	0	0	0	1	0	1	0	0	0	1	1	0	3	0	1	1	1	0	1	1	0	1	0	1	1	0	1	1	1	0	1	1	1	0	1	0	0	1	1	0	0	1	1	1	0
JHI-Hv50k-2016-426615	0	1	1	0	0	0	0	1	0	0	0	0	0	1	1	0	3	0	1	1	1	0	1	1	0	1	0	1	1	0	1	1	1	0	1	1	1	0	1	0	0	1	1	0	0	1	1	1	0
JHI-Hv50k-2016-426676	0	1	1	0	0	0	0	1	0	1	0	0	0	1	1	0	3	0	1	1	1	0	1	1	0	1	0	1	1	0	1	1	1	0	1	1	1	0	1	0	0	1	1	0	0	1	1	1	0
JHI-Hv50k-2016-426692	0	1	1	0	0	0	0	1	0	0	0	0	0	1	1	0	0	0	1	1	1	0	1	1	0	1	0	1	1	0	0	1	1	0	1	1	1	0	1	0	0	1	1	0	0	1	1	1	0
SCRI-RS-102455	0	1	1	0	0	0	0	1	0	0	0	0	0	1	1	0	0	0	1	1	0	0	1	1	0	1	0	1	1	0	0	1	1	0	1	1	1	0	1	0	3	1	1	0	0	1	1	1	0
SCRI-RS-162678	0	1	1	0	0	0	0	1	0	0	0	0	0	1	1	0	0	0	1	1	0	0	1	1	1	1	0	1	1	0	0	1	1	0	1	1	1	0	1	0	3	1	1	0	0	1	1	1	0
JHI-Hv50k-2016-427840	0	1	1	0	0	0	0	1	0	0	0	0	0	1	1	0	0	0	1	1	0	0	1	1	1	1	0	1	1	0	0	1	1	0	1	1	1	0	1	0	3	1	1	0	1	1	1	1	0
JHI-Hv50k-2016-428157	0	1	1	0	0	0	0	1	0	0	0	0	0	1	1	0	0	0	1	1	0	0	1	1	1	1	0	1	1	1	0	1	1	0	1	1	1	0	1	0	3	1	1	0	1	1	1	1	0
JHI-Hv50k-2016-428780	0	1	1	0	0	0	0	1	0	0	0	0	0	1	1	0	0	0	1	1	0	0	1	1	1	1	0	1	1	1	0	1	1	0	1	1	1	0	1	0	0	1	1	0	1	1	1	1	0
SCRI-RS-204644	0	1	1	0	0	0	0	1	0	0	0	0	0	1	1	0	0	0	1	1	0	0	1	1	1	1	0	1	1	1	0	1	1	0	1	1	1	0	1	0	0	0	1	0	1	1	1	1	0
JHI-Hv50k-2016-429246	0	1	1	0	0	0	0	1	0	0	0	0	0	1	1	0	0	0	0	1	0	0	1	1	1	1	0	1	1	1	0	1	1	0	1	1	1	0	1	0	0	0	1	0	1	1	1	1	0
SCRI-RS-235672	0	1	1	0	0	0	0	1	0	0	0	0	0	1	1	0	0	0	0	1	0	0	1	1	1	1	0	1	1	1	0	1	1	0	1	1	1	0	1	0	0	0	1	0	1	1	1	1	0
JHI-Hv50k-2016-429858	0	1	1	0	0	0	0	1	0	0	0	0	0	1	1	0	0	0	0	1	0	0	1	1	1	1	0	1	1	1	0	1	1	0	1	1	1	0	1	0	0	0	1	0	1	1	1	1	0
SCRI-RS-174459	0	1	1	0	0	0	0	1	0	0	0	0	0	1	1	0	0	0	0	1	0	0	1	1	1	1	0	1	1	1	0	1	1	0	1	1	1	0	1	0	0	0	1	0	1	1	1	1	0
JHI-Hv50k-2016-430227	0	1	0	0	0	0	0	1	0	0	0	0	0	1	1	0	0	0	0	1	0	0	1	1	1	1	0	1	1	1	0	1	1	0	1	1	1	0	1	0	0	0	1	0	1	1	0	1	0
JHI-Hv50k-2016-430383	0	1	0	0	0	0	0	1	0	0	0	0	0	1	1	0	0	0	0	1	0	0	1	1	1	1	0	1	1	1	0	1	1	1	1	1	1	0	1	0	0	0	1	0	1	1	0	1	0
SCRI-RS-17542	0	1	0	0	0	0	0	1	0	0	0	0	1	1	1	0	0	0	0	1	0	0	1	1	1	1	0	1	1	1	0	1	1	1	1	1	1	0	1	0	0	0	1	0	1	1	0	1	0
JHI-Hv50k-2016-433271	0	1	0	0	0	0	0	1	0	0	0	0	1	1	1	0	0	0	0	1	0	0	1	1	1	1	0	1	1	1	0	1	1	1	1	1	1	0	1	0	0	0	1	0	1	1	0	1	0
JHI-Hv50k-2016-433456	0	1	0	0	0	0	0	1	0	0	0	0	1	1	1	0	0	0	0	1	0	0	1	1	1	1	0	1	1	1	0	1	1	1	1	1	1	0	1	0	0	0	1	0	1	1	0	1	0
JHI-Hv50k-2016-435062	0	1	1	0	1	1	0	1	1	0	1	1	0	1	0	1	0	0	1	0	0	0	1	0	0	1	0	0	0	0	1	1	1	0	0	0	1	1	1	1	1	1	1	1	1	0	1	1	1
JHI-Hv50k-2016-437675	0	1	1	0	1	1	0	1	1	0	1	1	0	1	0	1	0	0	1	0	0	0	1	0	0	1	0	0	0	0	1	1	1	0	0	0	1	1	1	1	1	1	1	1	1	0	1	1	1
JHI-Hv50k-2016-440727	0	1	1	0	1	1	0	1	1	0	1	1	0	1	0	1	0	0	1	0	0	0	1	0	0	1	0	0	0	0	1	1	1	0	0	0	1	1	1	1	1	1	1	1	1	0	1	1	1
JHI-Hv50k-2016-443311	0	1	1	0	1	1	0	1	1	0	3	1	0	1	0	1	0	0	1	0	0	0	0	0	0	1	0	0	0	0	1	1	1	0	0	0	1	1	1	1	1	1	1	1	1	0	1	1	1
JHI-Hv50k-2016-445623	0	1	1	0	1	1	0	1	1	0	1	1	0	1	0	1	0	0	1	0	0	0	0	0	0	1	0	1	0	0	1	1	1	1	0	0	1	1	1	1	1	1	1	1	1	0	1	1	1
JHI-Hv50k-2016-446917	0	1	1	0	1	1	0	1	1	0	1	1	0	1	0	1	0	0	1	0	0	0	0	0	0	1	0	1	0	0	1	1	1	1	0	0	1	0	1	1	1	1	1	1	1	0	1	1	1
JHI-Hv50k-2016-447125	0	1	1	0	1	1	0	1	1	0	1	1	0	1	0	1	0	0	1	0	0	0	0	0	0	1	0	1	0	0	1	1	1	1	0	0	1	0	1	1	1	1	1	1	1	0	1	1	1
JHI-Hv50k-2016-447697	0	1	1	0	1	1	0	1	1	0	1	1	0	1	0	1	0	0	1	0	0	0	0	0	0	0	0	1	0	0	1	1	1	1	0	0	1	0	1	1	1	1	1	1	1	0	1	1	1
JHI-Hv50k-2016-448573	0	1	0	0	1	1	0	1	1	0	1	1	0	1	0	1	0	0	1	0	0	0	0	0	0	0	0	1	0	0	1	1	1	1	0	0	1	0	1	1	1	1	1	1	1	0	1	1	1
JHI-Hv50k-2016-449544	0	1	0	0	1	1	0	1	1	0	1	1	0	1	0	1	0	0	1	0	0	0	0	0	0	0	0	1	0	0	1	1	1	1	0	0	1	0	1	1	1	1	1	1	1	0	1	1	1
BOPA1-6394-944	0	1	0	0	1	1	0	1	1	0	1	1	0	1	0	1	0	0	1	0	0	0	0	0	0	0	0	1	0	0	1	1	1	1	0	0	1	0	1	1	1	1	1	1	1	0	1	1	1
JHI-Hv50k-2016-450348	0	1	0	0	1	1	0	1	1	0	1	1	0	1	0	1	0	0	1	0	0	0	0	0	0	0	0	1	0	0	1	1	1	1	0	0	1	0	1	1	1	1	1	1	1	0	1	1	1
JHI-Hv50k-2016-450461	0	1	0	0	1	1	0	1	1	0	1	1	0	1	0	1	0	0	1	0	0	0	0	0	0	0	0	1	0	0	1	1	1	1	0	0	1	0	1	1	1	1	1	1	1	0	1	1	1
JHI-Hv50k-2016-451547	0	1	0	0	1	1	0	1	1	0	1	1	0	1	0	1	0	0	1	0	0	0	0	0	0	0	0	1	0	0	1	1	1	1	0	0	1	0	1	1	1	1	1	1	1	0	1	1	1
JHI-Hv50k-2016-451563	0	1	0	0	1	1	0	1	1	0	1	1	0	1	0	1	0	0	1	0	0	0	0	0	0	0	0	1	0	0	1	1	1	1	0	0	1	0	1	1	1	1	1	1	1	0	1	1	1
JHI-Hv50k-2016-451629	0	1	0	0	1	1	0	1	1	0	1	1	0	1	0	1	0	0	1	0	0	0	0	0	0	0	0	1	0	0	1	1	1	1	0	0	1	0	1	1	1	1	1	1	1	0	1	1	1
JHI-Hv50k-2016-451659	0	1	0	0	1	1	0	1	1	0	1	1	0	1	0	1	0	0	1	0	0	0	0	0	0	0	0	1	0	0	1	1	1	1	0	0	1	0	1	1	1	1	1	1	1	0	1	1	1
JHI-Hv50k-2016-451706	0	1	0	0	1	1	0	1	1	0	1	1	0	1	0	1	0	0	1	0	0	0	0	0	0	0	0	1	0	0	1	1	1	1	0	0	1	0	1	1	1	1	1	1	1	0	1	1	1
JHI-Hv50k-2016-452400	0	1	0	0	1	1	0	1	1	0	1	1	0	1	0	1	0	0	1	0	0	0	0	0	0	0	0	1	0	0	1	1	1	1	0	0	1	0	1	1	1	1	1	1	1	0	1	1	1
JHI-Hv50k-2016-452666	0	1	0	0	1	1	0	1	1	0	1	1	1	1	0	1	0	0	1	0	0	0	0	0	0	0	0	1	1	0	1	1	1	1	0	0	1	0	1	1	1	1	1	1	1	0	1	1	1
SCRI-RS-197190	0	1	0	0	1	1	0	1	1	0	1	1	1	1	0	1	0	0	1	0	0	0	0	0	0	0	0	1	1	0	1	1	1	1	0	0	1	0	1	1	1	1	1	1	1	0	1	1	1
JHI-Hv50k-2016-452734	0	1	0	0	1	1	0	1	1	0	1	1	1	1	0	1	0	0	1	0	0	0	0	0	0	0	0	1	1	0	1	1	1	1	0	0	1	0	1	1	1	1	1	1	1	0	1	1	1
JHI-Hv50k-2016-452740	0	1	0	0	1	1	0	1	1	0	1	1	1	1	0	1	0	0	1	0	0	0	0	0	0	0	1	1	1	0	1	1	1	1	0	0	1	0	1	1	1	1	1	1	1	0	1	1	1
JHI-Hv50k-2016-452806	0	1	0	1	1	1	0	1	1	0	1	1	1	3	0	1	0	0	1	0	0	0	0	0	0	0	1	1	1	0	1	1	1	1	0	0	1	0	1	1	1	1	1	1	1	0	1	1	1
JHI-Hv50k-2016-452820	0	1	0	1	1	1	0	1	1	0	1	1	1	3	0	1	0	0	1	0	0	0	0	0	0	0	1	1	1	0	1	1	1	1	0	0	1	0	1	1	1	1	1	1	1	0	1	1	1
JHI-Hv50k-2016-452839	0	1	0	1	1	1	0	1	1	0	1	1	1	3	0	1	0	0	1	0	0	0	0	0	0	0	1	1	1	0	1	1	1	1	0	0	1	0	1	1	0	1	1	1	1	0	1	1	1
JHI-Hv50k-2016-452912	0	1	0	1	1	1	0	1	1	0	1	1	1	3	0	1	0	0	1	0	0	0	0	0	0	0	1	1	1	0	1	1	1	1	0	0	1	0	1	1	0	1	1	1	1	0	1	1	1
JHI-Hv50k-2016-453011	0	1	0	1	1	1	0	1	1	0	1	1	1	3	0	1	0	0	1	0	0	0	0	0	0	0	1	1	1	0	1	1	1	1	0	0	1	0	1	1	0	1	1	1	1	0	1	1	0
SCRI-RS-223021	0	1	0	1	1	1	0	1	1	0	1	1	1	3	0	1	0	0	1	0	0	0	0	0	0	0	1	1	1	0	1	1	1	1	0	0	1	0	1	1	0	1	1	1	1	0	1	1	0
JHI-Hv50k-2016-453618	0	1	0	1	1	0	0	1	1	0	1	1	1	3	0	1	0	0	1	0	0	1	0	0	0	0	1	1	1	0	1	1	1	1	0	0	1	0	1	1	0	1	1	1	1	0	1	1	0
JHI-Hv50k-2016-453875	0	1	0	1	1	0	0	1	1	0	1	1	1	3	0	1	0	0	1	0	0	1	0	0	0	0	1	1	1	0	1	1	1	1	0	1	1	0	1	1	0	1	1	1	1	0	1	1	0
JHI-Hv50k-2016-454168	0	1	0	1	1	0	0	1	1	0	1	1	1	3	0	1	0	0	1	0	0	1	0	0	0	0	1	1	1	0	1	1	1	1	0	1	1	0	1	1	0	1	1	1	1	0	1	1	0
JHI-Hv50k-2016-454406	0	1	1	1	1	0	0	1	1	0	1	1	1	3	0	1	0	0	1	0	0	1	0	0	0	0	1	1	1	0	1	1	1	1	0	1	1	0	1	1	0	1	1	1	1	0	1	1	0
JHI-Hv50k-2016-454991	0	1	1	1	1	0	0	1	1	0	1	1	1	3	0	1	0	0	1	0	1	1	0	0	0	0	1	1	1	0	1	1	1	1	0	1	1	0	1	1	0	1	1	1	1	0	1	1	0
JHI-Hv50k-2016-455092	0	1	1	1	1	0	0	1	1	0	1	1	1	3	0	1	0	0	1	0	1	1	1	0	0	0	1	1	1	0	1	1	1	1	0	1	1	0	1	1	0	1	1	1	1	0	1	1	0
JHI-Hv50k-2016-455798	0	1	1	1	1	0	0	1	1	0	1	1	1	0	0	1	0	0	1	0	1	1	1	0	0	0	1	1	1	0	1	1	1	1	0	1	1	0	1	1	0	1	1	1	1	0	1	1	0
JHI-Hv50k-2016-455890	0	1	1	1	1	0	0	1	1	0	1	1	1	3	0	1	0	0	1	0	1	1	1	0	0	0	1	1	1	0	1	1	1	1	0	1	1	0	0	1	0	1	1	1	1	0	1	1	0
JHI-Hv50k-2016-455948	0	1	1	1	1	0	0	1	1	0	1	1	1	3	0	1	0	0	1	0	1	1	1	0	0	0	1	1	1	0	1	1	1	1	0	1	1	0	0	1	0	1	1	1	1	0	1	1	0
JHI-Hv50k-2016-456434	0	1	1	1	1	0	0	1	1	0	1	1	1	3	0	1	0	0	1	0	1	1	1	0	0	0	1	1	1	0	1	1	1	1	1	1	1	0	0	1	0	1	1	1	1	0	1	1	0
SCRI-RS-214533	0	1	1	1	1	0	0	1	1	0	0	1	0	3	0	1	0	0	1	0	1	1	1	0	0	0	1	1	1	0	1	1	1	1	1	1	1	0	0	1	0	1	1	1	1	0	1	1	0
JHI-Hv50k-2016-457708	0	1	1	1	1	0	0	1	1	0	0	1	0	3	0	1	0	0	1	0	1	1	1	0	0	0	1	1	1	0	1	1	1	1	1	1	1	0	0	1	0	1	0	1	1	0	1	1	0
SCRI-RS-150517	0	1	1	1	1	0	0	1	1	0	0	1	0	3	0	1	0	0	1	0	1	1	1	1	0	0	1	1	1	0	1	1	1	1	1	1	1	0	0	1	0	1	0	1	1	0	1	1	0
BOPA1-2124-984	0	1	1	1	1	0	0	1	1	0	0	1	0	3	0	1	1	0	1	0	1	1	1	1	0	0	1	1	1	0	1	1	1	1	1	1	1	0	0	1	0	1	0	1	1	0	1	1	0
SCRI-RS-209500	0	1	1	1	1	0	0	1	1	0	0	1	0	3	0	1	1	0	1	0	1	1	1	1	0	0	1	1	1	0	1	1	1	1	1	1	1	0	0	1	0	1	0	1	1	0	1	1	0
JHI-Hv50k-2016-459243	0	1	1	1	1	0	0	1	1	0	0	1	0	3	0	1	1	0	1	0	1	1	1	1	0	0	1	1	1	0	1	1	1	1	1	1	1	0	0	1	0	1	0	1	1	0	1	1	0
BOPA2-12-20803	0	1	1	1	1	0	0	1	1	0	0	1	0	3	0	1	1	0	1	0	1	1	1	1	0	0	1	1	1	0	1	1	1	1	1	1	1	0	0	1	0	1	0	1	1	0	1	1	0
JHI-Hv50k-2016-459618	0	1	1	1	1	0	0	1	1	0	0	1	0	3	0	1	1	0	1	0	1	1	1	1	0	0	1	1	1	0	1	1	1	1	1	1	1	0	0	1	0	1	0	1	1	0	1	1	0
BOPA2-12-30893	0	1	1	1	1	0	0	1	1	0	0	1	0	3	0	1	1	0	1	0	1	1	1	1	0	0	1	1	1	0	1	1	1	1	1	1	1	0	0	1	0	1	1	1	1	0	1	1	0
BOPA2-12-10218	0	1	1	1	1	0	0	1	1	0	0	1	0	3	0	0	1	0	1	0	1	1	1	1	0	0	1	1	1	0	1	1	1	1	1	1	1	0	0	1	0	1	1	1	1	0	1	1	0
JHI-Hv50k-2016-460146	0	1	1	1	1	0	0	1	1	0	0	1	0	3	0	0	1	0	1	0	1	1	1	1	0	0	1	1	1	0	1	1	1	1	1	1	1	0	0	1	0	1	1	1	1	0	1	1	0
JHI-Hv50k-2016-460677	0	1	1	1	1	0	0	1	1	0	0	1	0	3	0	0	1	0	1	0	1	0	1	1	0	0	1	1	1	0	1	0	1	1	1	1	1	1	0	1	0	1	1	1	1	0	1	1	0
JHI-Hv50k-2016-460794	0	1	1	1	1	0	1	1	1	0	0	1	0	3	0	0	1	0	1	0	1	0	1	1	0	0	1	1	1	0	1	0	1	1	1	1	1	1	0	1	0	1	1	1	1	0	1	1	0
JHI-Hv50k-2016-461069	0	1	1	1	1	0	1	1	1	0	0	1	0	0	0	0	1	0	1	0	1	0	1	1	0	0	1	1	1	0	1	0	1	1	1	1	1	1	0	0	0	1	1	1	1	0	1	1	0
BOPA1-398-1244	0	1	1	1	1	0	1	1	1	0	0	1	0	0	0	0	0	0	1	0	1	0	1	1	0	0	1	1	1	0	1	0	1	1	1	1	1	1	0	0	0	1	1	1	1	0	1	1	0
JHI-Hv50k-2016-461181	0	1	1	1	1	0	1	1	1	0	0	1	0	0	0	0	0	0	1	0	1	0	1	1	0	0	1	1	1	0	1	0	1	1	1	1	1	1	0	1	0	1	1	1	1	0	1	1	0
BOPA2-12-30143	0	1	1	1	1	0	1	1	1	0	0	1	0	0	0	0	0	0	1	0	1	1	1	1	0	0	1	1	1	0	1	0	1	1	1	1	3	1	0	1	0	1	1	1	1	0	1	1	0
BOPA1-ConsensusGBS0356-1	0	1	1	1	1	0	1	1	1	0	0	1	0	0	0	0	0	0	1	0	1	1	1	1	0	0	1	1	1	0	1	0	1	1	1	1	3	1	0	1	0	1	1	1	1	0	1	1	0
JHI-Hv50k-2016-461918	0	1	1	1	0	0	1	1	1	0	1	1	0	0	0	0	0	0	1	0	1	1	1	1	0	0	1	1	1	0	1	0	1	1	1	1	3	1	0	1	0	1	1	1	1	0	1	1	0
JHI-Hv50k-2016-461928	0	1	1	1	0	0	1	1	1	0	0	1	0	0	0	0	0	0	1	0	1	1	1	1	0	0	1	1	1	0	1	0	1	1	1	1	3	1	0	1	0	1	1	1	1	0	1	1	0
SCRI-RS-155795	0	1	1	1	0	0	1	1	1	0	1	1	0	0	0	0	0	0	1	0	1	1	1	1	0	0	1	1	1	0	1	0	1	1	1	1	3	1	0	1	0	1	1	1	1	0	1	1	0
JHI-Hv50k-2016-462179	0	1	1	1	0	0	1	1	1	0	1	1	0	0	0	0	0	0	0	0	1	1	1	1	0	0	1	1	1	0	1	0	1	1	1	1	3	1	0	1	0	1	1	1	1	0	1	1	0
SCRI-RS-202061	0	1	1	1	0	1	1	1	1	0	1	1	0	0	0	0	0	0	0	0	1	1	1	1	0	0	1	1	1	0	1	0	1	1	1	1	3	1	0	1	0	1	1	1	1	1	1	1	0
JHI-Hv50k-2016-462760	0	1	1	1	0	1	0	1	1	0	1	1	0	0	0	0	0	0	0	0	1	1	1	1	0	0	1	1	1	0	1	0	1	1	1	1	3	1	0	1	0	1	1	1	1	1	0	1	0
JHI-Hv50k-2016-463001	0	1	1	1	0	1	0	1	1	0	1	1	0	0	0	0	0	0	0	0	1	1	1	1	0	0	1	1	1	0	1	0	1	1	1	1	3	1	0	1	0	1	1	1	1	1	0	1	0
JHI-Hv50k-2016-463268	0	1	1	1	0	1	0	1	1	0	1	1	0	0	0	0	0	0	0	0	1	1	1	1	0	0	1	1	1	0	1	0	1	1	1	1	3	1	0	1	0	1	1	1	1	1	0	1	0
JHI-Hv50k-2016-463401	0	1	1	1	0	1	0	1	1	0	1	1	0	0	0	0	0	0	0	1	1	1	1	1	0	0	1	1	1	0	1	0	1	1	1	1	3	1	0	1	0	1	1	1	1	1	0	1	0
JHI-Hv50k-2016-463438	0	1	1	1	0	1	0	1	1	0	1	1	0	0	0	0	0	0	0	1	1	1	1	1	0	0	1	1	1	0	1	0	1	1	1	1	3	1	0	1	0	1	1	0	1	1	0	1	0
JHI-Hv50k-2016-463595	0	1	1	1	0	1	0	1	1	0	1	1	0	0	0	0	0	0	0	1	1	1	1	1	0	1	1	1	1	0	1	0	1	1	1	1	3	1	0	1	0	1	1	0	1	1	0	1	0
JHI-Hv50k-2016-463775	0	1	1	1	0	1	0	1	1	0	1	1	0	0	0	0	0	0	0	1	1	1	1	1	0	1	1	1	1	0	1	0	1	1	1	1	3	1	0	1	0	1	1	0	1	1	0	1	0
SCRI-RS-169904	0	1	1	1	0	1	0	1	1	0	1	1	0	0	0	0	0	0	0	1	1	1	1	1	0	1	1	1	1	0	1	0	1	1	1	1	3	1	0	1	0	1	1	0	1	1	0	1	0
JHI-Hv50k-2016-464589	0	1	1	1	0	1	0	1	1	0	1	1	0	0	1	0	0	0	0	1	1	1	1	1	0	1	1	1	1	0	1	0	1	1	1	1	3	1	0	1	0	1	3	0	1	1	0	1	0
SCRI-RS-212956	0	1	1	1	0	1	0	1	1	0	1	1	0	0	1	0	0	0	0	1	1	1	1	1	0	1	1	1	1	0	1	0	1	1	1	1	3	1	0	1	0	1	3	0	1	1	0	1	0
JHI-Hv50k-2016-465225	0	1	1	1	0	1	0	1	1	0	1	1	0	0	1	0	0	0	0	1	1	1	1	1	0	1	1	1	1	0	1	0	1	1	1	1	3	0	0	1	0	1	3	0	1	1	0	1	0
JHI-Hv50k-2016-465287	0	1	1	1	0	1	0	1	1	0	1	1	0	0	1	0	0	0	0	1	1	1	1	1	0	1	1	1	1	0	1	0	1	1	1	1	3	0	0	1	0	1	3	0	1	1	0	1	0
SCRI-RS-7115	0	1	1	1	0	1	0	1	1	0	1	1	0	0	1	0	0	0	0	1	1	1	1	1	0	1	1	1	1	0	1	0	1	1	1	1	3	0	0	1	0	1	3	0	1	1	0	1	0
JHI-Hv50k-2016-466574	0	1	1	1	0	1	0	1	1	0	1	1	0	0	1	0	0	0	0	1	1	1	1	1	0	1	1	1	1	0	1	0	1	1	1	1	3	0	0	1	0	1	3	0	1	1	0	1	0
SCRI-RS-196063	0	1	1	1	0	1	0	1	1	0	1	1	0	0	1	0	0	0	0	1	1	1	1	1	0	1	1	1	1	0	1	0	1	1	1	1	3	0	0	1	0	1	3	0	1	1	0	1	0
SCRI-RS-137626	0	1	1	1	0	1	0	1	1	0	1	1	0	0	1	0	0	0	0	1	1	1	1	1	0	1	1	1	1	0	1	0	1	1	1	1	3	0	0	1	0	1	3	0	1	1	0	1	0
SCRI-RS-161111	0	1	1	1	0	1	0	1	1	0	1	1	0	0	1	0	0	0	0	1	1	1	1	1	0	1	1	1	1	0	1	0	1	1	1	1	3	0	0	1	0	1	3	0	1	1	0	0	0
SCRI-RS-230478	0	1	1	1	0	1	0	1	1	0	1	1	0	0	1	0	0	1	0	1	1	1	1	1	1	1	1	1	1	0	1	0	1	1	1	1	0	0	0	1	0	1	1	0	1	1	0	0	0
BOPA1-2669-1012	0	1	1	1	1	1	0	1	1	0	1	1	0	0	1	0	0	1	0	1	1	1	1	1	1	1	1	1	1	0	1	0	1	1	1	1	0	0	0	1	0	1	1	0	1	1	0	0	0
JHI-Hv50k-2016-468175	0	1	1	1	1	1	0	1	1	0	1	1	0	0	1	0	0	1	0	1	1	1	1	1	1	1	1	1	1	0	1	0	1	1	1	1	0	0	0	1	0	1	1	0	1	1	0	0	0
JHI-Hv50k-2016-468204	0	1	1	1	1	1	0	1	1	0	1	1	0	0	1	0	0	1	0	1	1	1	1	1	1	1	1	1	1	0	1	0	1	1	1	1	0	0	0	1	0	1	1	0	1	0	0	0	0
JHI-Hv50k-2016-468461	0	1	1	1	1	1	0	1	1	0	1	1	0	0	1	0	0	1	0	1	1	1	1	1	1	1	1	1	1	0	1	0	1	1	1	1	0	0	0	1	0	1	1	0	1	0	0	0	0
JHI-Hv50k-2016-468513	0	1	1	1	1	1	0	1	1	0	1	1	0	0	1	0	0	1	0	1	1	1	1	1	1	1	1	1	1	0	1	0	1	1	1	1	0	0	0	1	0	1	1	0	1	0	0	0	0
SCRI-RS-15864	0	1	1	1	1	1	0	1	1	0	1	1	0	0	1	0	0	1	0	1	1	1	1	1	1	1	1	1	1	0	1	0	1	1	1	1	0	0	0	1	0	1	1	0	1	0	0	0	0
JHI-Hv50k-2016-469166	0	1	1	1	1	1	0	1	1	0	1	1	0	0	1	0	0	1	0	1	1	1	1	1	1	1	1	1	1	0	1	0	1	1	1	1	0	0	0	1	0	1	1	0	1	0	0	0	0
JHI-Hv50k-2016-469196	0	1	1	1	1	1	0	1	1	0	1	1	0	0	1	0	0	1	0	1	1	1	1	1	1	1	1	1	1	0	1	0	1	1	1	1	0	0	0	1	0	1	1	0	1	0	0	0	0
JHI-Hv50k-2016-469380	0	1	1	1	1	1	0	1	1	0	1	1	0	0	1	0	0	1	0	1	1	1	1	1	1	1	1	1	1	0	1	1	1	1	1	1	0	0	0	1	0	1	0	0	1	0	0	0	0
JHI-Hv50k-2016-470939	0	1	1	1	1	1	0	1	1	0	1	1	0	0	1	0	0	1	0	1	1	1	1	1	1	1	1	1	1	0	1	1	1	1	1	1	0	0	0	1	0	1	0	0	1	0	0	0	0
JHI-Hv50k-2016-471007	0	1	1	1	1	1	0	1	1	0	1	1	0	0	1	0	0	1	0	1	1	1	1	1	1	1	1	1	1	0	1	1	1	1	1	1	0	0	0	1	0	1	0	0	1	0	0	0	0
JHI-Hv50k-2016-473073	0	1	1	1	1	1	0	1	1	0	1	1	0	0	1	0	0	1	0	1	1	1	1	1	1	1	1	1	1	0	1	1	0	1	1	0	0	0	0	1	0	1	0	0	1	0	0	0	0
JHI-Hv50k-2016-473386	0	1	1	1	1	1	0	1	1	0	1	1	0	0	1	0	0	1	0	1	1	1	1	1	1	1	1	1	1	0	1	1	0	1	1	0	0	0	0	1	0	1	0	0	1	0	0	0	0
SCRI-RS-154193	0	1	1	1	1	1	0	1	1	0	1	1	0	0	1	0	0	1	0	1	1	1	1	1	1	1	1	1	1	0	1	1	0	1	1	0	0	0	0	1	0	1	0	0	1	0	0	0	0
JHI-Hv50k-2016-473593	0	1	1	1	1	1	0	1	1	0	1	1	0	0	1	0	0	1	0	1	1	1	0	1	1	1	1	1	1	0	1	1	0	1	1	0	0	0	0	1	0	1	0	0	1	0	0	0	0
BOPA2-12-30496	0	1	1	1	1	1	0	1	1	0	1	1	0	0	1	0	0	1	0	1	1	1	0	1	1	1	1	1	1	0	1	1	0	1	1	0	0	0	0	1	0	1	0	0	1	0	0	0	0
SCRI-RS-165918	0	1	1	1	1	1	0	1	1	0	1	1	0	0	1	0	0	1	0	1	1	1	0	1	1	1	1	1	1	0	1	1	0	1	1	0	0	0	0	1	0	1	0	0	1	0	0	0	0
SCRI-RS-158234	0	1	1	1	1	1	0	1	1	0	1	1	0	0	1	1	0	1	0	1	1	1	0	1	1	1	1	1	1	0	1	1	0	1	1	0	0	0	0	1	0	1	0	0	1	0	0	0	0
SCRI-RS-235641	0	1	1	1	1	1	0	1	1	0	1	1	0	0	1	1	0	1	0	1	1	1	0	1	1	1	1	1	1	0	1	1	0	1	1	0	1	0	0	1	0	1	0	0	1	0	0	0	0
JHI-Hv50k-2016-475630	0	1	1	1	1	1	0	1	1	0	1	1	0	0	1	1	0	1	0	1	1	1	0	1	1	1	1	1	1	0	1	1	0	1	1	0	1	0	0	1	0	1	0	0	1	0	0	0	0
BOPA2-12-11254	0	1	1	1	1	1	0	1	1	0	1	1	0	0	1	1	0	1	0	1	1	1	0	1	1	1	1	1	1	0	1	1	0	1	1	0	1	0	0	1	0	1	0	0	1	0	0	0	0
JHI-Hv50k-2016-475706	0	1	1	1	1	1	0	1	1	0	1	1	0	0	1	1	0	1	0	1	1	1	0	1	1	1	1	1	1	0	1	1	0	1	1	0	1	0	0	1	0	1	0	0	1	0	0	0	0
BOPA1-5138-265	0	1	1	1	1	1	0	1	1	0	1	1	0	0	1	1	0	1	0	1	1	1	0	1	1	1	1	1	1	0	1	1	0	1	1	0	1	0	0	1	0	1	0	0	1	0	0	0	0
JHI-Hv50k-2016-479756	0	1	1	1	1	1	0	1	1	0	1	1	0	0	1	1	0	1	0	1	1	1	0	1	1	1	1	1	1	0	1	1	0	1	1	0	1	0	0	1	0	1	0	0	1	0	0	0	0
SCRI-RS-235584	0	1	1	1	1	1	0	1	1	0	1	1	0	0	1	1	0	1	0	1	1	1	0	1	1	1	1	1	1	0	1	1	0	1	1	0	1	0	0	1	0	1	0	0	1	0	0	0	0
SCRI-RS-175164	0	1	1	1	1	1	0	1	1	0	1	1	0	0	1	1	0	1	0	1	1	1	0	1	1	1	1	1	1	0	1	1	0	1	1	0	1	0	0	1	0	1	0	0	1	1	0	0	0
BOPA2-12-31513	0	1	1	1	1	1	0	1	1	0	1	1	0	0	1	1	0	1	0	1	0	1	0	1	1	1	1	1	1	0	1	1	0	1	1	0	1	0	0	1	0	1	0	0	1	1	0	0	0
SCRI-RS-2914	0	1	1	1	1	1	0	1	1	0	1	1	0	0	1	1	0	1	0	1	0	1	0	1	1	1	1	1	1	0	1	1	0	1	1	0	1	0	0	1	0	1	0	0	1	1	0	0	0
SCRI-RS-219581	0	1	1	1	1	1	0	1	1	0	1	1	0	0	1	1	0	1	0	1	0	1	0	1	1	1	1	1	1	0	1	1	0	1	0	0	1	0	0	1	0	1	0	0	1	1	0	0	0
SCRI-RS-194291	0	1	1	1	1	1	0	1	1	0	1	1	0	0	1	1	0	1	0	1	0	1	0	0	1	1	1	1	1	0	1	1	0	1	0	0	1	0	0	1	0	1	0	0	1	1	0	0	0
JHI-Hv50k-2016-491428	0	1	1	1	1	1	0	1	1	0	1	1	0	0	1	1	0	1	0	1	0	1	0	1	1	1	1	1	1	0	1	1	0	1	0	0	1	0	0	1	0	1	0	0	1	1	0	0	0
SCRI-RS-104566	0	1	1	1	1	1	0	1	1	0	1	1	0	0	1	1	0	1	0	1	0	1	0	1	1	1	1	1	1	0	1	1	0	1	0	0	1	0	0	1	0	1	0	0	1	0	0	0	0
JHI-Hv50k-2016-491516	0	1	1	1	1	1	0	1	1	0	1	1	0	0	1	1	0	1	0	1	0	1	0	1	1	1	1	1	1	0	1	1	0	1	0	0	1	1	0	1	0	1	0	0	1	0	0	0	0
SCRI-RS-194841	0	1	1	1	1	1	0	1	1	0	1	1	0	0	1	1	0	1	0	1	1	1	0	1	1	1	1	1	1	0	1	1	0	1	0	0	1	1	0	1	0	0	0	0	1	0	0	0	0
SCRI-RS-4562	0	1	1	1	1	1	0	1	1	0	1	1	0	0	1	1	0	1	0	1	1	1	0	1	1	1	1	1	1	0	1	1	0	1	0	0	1	1	0	1	0	0	0	0	1	0	0	0	0
JHI-Hv50k-2016-491626	0	1	1	1	1	1	0	1	1	0	1	1	0	0	1	1	0	1	0	1	1	1	0	1	1	1	1	1	1	0	1	1	0	1	0	0	1	1	0	1	0	0	0	0	1	0	0	0	0
JHI-Hv50k-2016-491699	0	1	1	1	1	1	0	1	1	0	1	1	0	0	1	1	0	1	0	1	1	1	0	1	1	1	1	1	1	0	1	1	0	1	0	0	1	1	0	1	0	0	0	0	1	0	0	0	0
SCRI-RS-112863	0	1	1	1	1	1	0	1	1	0	1	1	0	0	1	1	0	1	0	1	1	1	0	1	1	1	1	1	1	0	1	1	0	1	0	0	1	1	0	1	0	0	0	0	1	0	0	0	0
BOPA2-12-21479	0	1	1	1	1	1	0	1	1	0	1	1	0	0	1	1	0	1	0	1	1	1	0	1	1	1	1	1	1	0	1	1	0	1	0	0	1	1	0	1	0	0	0	0	1	0	0	0	0
JHI-Hv50k-2016-492638	0	1	1	1	1	1	0	1	1	0	1	1	0	0	1	1	0	1	0	0	1	1	0	1	1	1	1	1	1	0	1	1	0	1	0	0	1	1	0	1	0	1	0	0	1	0	0	0	0
JHI-Hv50k-2016-492692	0	1	1	1	1	1	0	1	1	0	1	1	0	0	1	1	0	1	0	0	1	1	0	1	1	1	1	1	1	0	1	1	0	1	0	0	1	1	0	1	0	1	0	0	1	0	0	0	0
JHI-Hv50k-2016-493017	0	1	1	1	1	1	0	1	1	0	1	1	0	0	1	1	0	1	0	0	1	1	0	1	1	1	1	1	1	0	1	1	0	1	0	0	1	1	0	1	0	1	0	0	1	0	0	0	0
BOPA2-12-20611	0	1	1	1	1	1	0	1	1	0	1	1	0	0	1	1	0	1	0	0	1	1	0	1	1	1	1	1	1	0	1	1	0	1	0	0	1	1	0	1	0	1	0	0	1	0	0	0	0
SCRI-RS-4556	0	1	1	1	1	1	0	1	1	0	1	1	0	0	1	1	0	1	0	0	1	1	0	1	1	1	1	1	1	0	1	1	0	1	0	0	1	1	0	1	0	1	0	0	1	0	0	0	0
JHI-Hv50k-2016-493889	0	1	0	1	1	1	0	1	1	0	1	1	0	0	1	1	0	1	0	0	1	1	0	1	1	1	1	1	1	0	1	1	0	1	0	0	1	1	0	1	0	1	0	0	1	0	0	0	0
JHI-Hv50k-2016-493907	0	1	0	1	1	1	0	1	1	0	1	1	0	0	1	1	0	1	0	0	1	1	0	1	1	1	1	1	1	0	1	1	0	1	0	0	1	1	0	1	0	1	0	0	1	0	0	0	0
JHI-Hv50k-2016-493972	0	1	0	1	1	1	0	1	1	0	1	1	0	0	1	1	0	1	0	0	1	1	0	1	1	1	1	1	1	0	1	1	0	1	0	0	1	1	0	1	0	1	0	0	1	0	0	0	0
BOPA2-12-21464	0	1	0	1	1	1	0	1	1	0	1	1	0	0	1	1	0	1	0	0	1	1	0	1	1	1	1	1	1	0	1	1	0	1	0	0	1	1	0	0	0	1	0	0	1	0	0	0	0
SCRI-RS-136586	0	1	0	1	1	1	0	1	1	0	1	1	0	0	1	1	0	1	0	0	1	1	0	1	1	1	1	0	1	0	1	1	0	1	0	0	1	1	0	0	0	1	0	0	1	0	0	0	0
JHI-Hv50k-2016-494113	0	1	0	1	1	1	0	1	1	0	1	1	0	0	1	1	0	1	0	0	0	1	0	1	1	1	1	0	1	0	1	1	0	1	0	0	1	1	0	0	0	1	0	0	1	0	0	0	0
JHI-Hv50k-2016-494246	0	1	0	1	1	1	0	1	1	0	1	1	0	0	1	1	0	1	0	0	0	1	0	1	1	1	1	0	1	0	1	1	0	1	0	0	1	1	0	0	0	1	0	0	1	0	0	0	0
SCRI-RS-7974	0	1	0	1	1	1	0	1	1	0	1	1	0	0	1	1	0	1	0	0	0	1	0	1	1	1	1	0	1	0	1	1	0	1	0	0	0	1	0	0	0	1	0	0	1	0	0	0	0
SCRI-RS-141732	0	1	0	1	1	1	0	1	1	0	1	1	0	0	1	1	0	1	0	0	0	1	0	1	1	1	1	0	1	0	1	1	0	1	0	0	0	1	0	0	0	1	0	0	1	0	0	0	0
JHI-Hv50k-2016-495236	0	1	0	1	1	1	0	1	1	0	1	1	0	0	1	1	0	1	0	0	0	1	0	1	1	1	1	0	1	0	1	1	0	1	0	0	0	1	0	0	0	1	0	0	1	0	0	0	0
JHI-Hv50k-2016-495986	0	1	0	1	1	1	0	1	1	0	1	1	0	0	1	1	0	1	0	0	0	1	0	1	1	1	1	0	1	0	1	1	0	1	0	0	0	1	0	0	0	1	0	0	1	0	0	0	0
JHI-Hv50k-2016-497019	0	1	0	1	1	1	0	1	1	0	1	1	0	0	1	1	0	1	0	0	0	1	0	1	1	1	1	0	1	0	0	1	0	1	0	0	0	1	0	0	0	1	0	3	1	0	0	0	0
BOPA1-1178-279	0	1	0	1	1	1	0	1	1	0	1	0	0	0	1	1	0	1	0	0	0	1	0	1	1	1	1	0	1	0	0	1	0	1	0	0	0	1	0	0	0	1	0	3	1	0	0	0	0
JHI-Hv50k-2016-498048	0	1	0	1	1	1	0	1	1	0	0	0	0	0	1	1	0	1	0	0	0	1	0	1	1	1	1	0	1	0	0	0	0	1	0	0	0	0	0	0	0	1	0	1	1	0	0	0	0
JHI-Hv50k-2016-498211	0	1	0	1	1	1	0	1	1	0	0	0	0	0	1	1	0	1	0	0	0	1	0	1	1	1	1	0	1	0	0	0	0	1	0	0	0	0	0	0	0	1	0	1	1	0	0	0	0
JHI-Hv50k-2016-498830	0	1	0	1	1	1	0	1	1	0	0	0	0	0	1	1	0	1	0	0	0	1	0	1	1	1	1	0	1	0	0	0	0	1	0	0	0	0	0	0	0	1	0	1	1	0	0	0	0
JHI-Hv50k-2016-499019	0	1	0	1	1	1	0	1	1	0	0	0	0	0	1	1	0	1	0	0	0	1	0	1	1	1	1	0	1	0	0	0	0	1	0	0	0	0	0	0	0	1	0	1	1	0	0	0	0
BOPA1-1789-782	0	1	0	1	1	1	0	1	1	0	0	0	0	0	1	1	0	1	0	0	0	0	0	1	1	1	1	0	1	0	0	0	0	1	0	0	0	0	0	0	0	1	1	1	1	0	0	0	0
SCRI-RS-174255	0	1	0	1	1	1	0	1	1	0	0	0	0	0	1	1	0	1	0	0	0	0	0	1	1	1	1	0	1	0	0	0	0	0	0	0	0	0	0	0	0	1	1	1	1	0	0	0	0
SCRI-RS-160611	0	1	0	1	1	1	0	1	1	0	0	0	0	0	1	1	0	1	0	0	0	0	0	1	1	1	1	0	1	0	0	0	0	0	0	0	0	0	0	0	0	1	1	1	1	0	0	0	0
SCRI-RS-144462	0	1	0	1	1	1	0	1	1	0	0	0	0	0	1	1	0	1	0	0	0	0	0	1	1	1	1	0	1	0	0	0	0	0	0	0	0	0	0	0	0	1	1	1	1	0	0	0	0
JHI-Hv50k-2016-500791	0	1	0	1	1	1	0	1	1	0	0	0	0	0	1	1	0	1	0	0	0	0	0	1	1	1	1	0	1	0	0	0	0	0	0	0	0	0	0	0	0	1	1	1	1	0	0	0	0
JHI-Hv50k-2016-501105	0	1	0	1	1	1	0	1	1	0	0	0	0	0	1	1	0	1	0	0	0	0	0	1	1	1	1	0	1	0	0	0	0	0	0	0	0	0	0	0	0	1	1	1	1	0	0	0	0
JHI-Hv50k-2016-501080	0	1	0	1	1	1	0	1	1	0	0	0	0	0	1	1	0	1	0	0	0	0	0	1	1	1	1	0	1	0	0	0	0	1	0	0	0	0	0	0	0	1	1	1	1	0	0	0	0
SCRI-RS-138715	0	1	0	1	1	1	0	1	1	0	0	0	0	0	1	1	0	1	0	0	0	0	0	1	0	1	1	0	1	0	0	0	0	1	0	0	0	0	0	0	0	1	1	1	1	0	0	0	0
JHI-Hv50k-2016-501900	0	1	0	1	1	1	0	1	1	0	0	0	0	0	1	1	0	1	0	0	0	0	0	1	0	1	1	0	1	0	0	0	0	1	0	0	0	0	0	0	0	1	1	1	1	0	0	0	0
JHI-Hv50k-2016-501970	0	1	0	1	1	1	0	1	1	0	0	0	0	0	1	1	0	1	0	0	0	0	0	1	0	1	1	0	1	0	0	0	0	1	0	0	0	0	1	0	0	1	1	1	1	0	0	0	0
JHI-Hv50k-2016-502090	0	1	0	1	1	1	0	1	1	0	0	0	0	0	1	1	0	1	0	0	0	0	0	1	0	1	1	0	0	1	0	0	0	1	0	0	0	0	1	0	0	0	1	1	1	0	0	0	0
JHI-Hv50k-2016-502956	0	1	0	1	1	0	0	1	1	0	0	0	0	0	1	1	0	1	0	0	0	0	0	1	0	1	1	0	0	1	0	0	0	1	0	0	0	0	1	0	0	0	1	1	1	0	0	0	0
JHI-Hv50k-2016-502996	0	1	0	1	1	0	0	1	1	0	0	0	0	0	1	1	0	1	0	0	0	0	0	1	0	1	1	0	0	1	0	0	0	1	0	0	0	0	1	0	0	0	1	1	1	0	0	0	0
JHI-Hv50k-2016-503418	0	1	0	1	1	0	0	1	1	0	0	0	0	0	1	1	0	1	0	0	0	0	0	1	0	1	1	0	0	1	0	0	0	1	0	0	0	0	1	0	0	0	1	1	1	0	0	0	0
BOPA1-5796-1189	0	1	0	1	1	0	0	1	1	0	0	0	0	0	1	1	0	1	0	0	0	0	0	1	0	1	1	0	0	1	0	0	0	1	0	0	0	0	1	0	0	0	1	1	1	0	0	0	0
JHI-Hv50k-2016-503524	0	1	0	1	1	0	0	1	1	0	0	0	0	0	1	1	0	1	0	0	0	0	0	1	0	1	1	0	0	1	0	0	0	1	0	0	0	0	1	0	0	0	1	1	1	0	0	0	0
SCRI-RS-206189	0	1	0	1	1	0	0	1	1	0	0	0	0	0	0	1	0	1	0	0	0	0	0	1	0	1	1	0	0	1	0	0	0	1	0	0	0	0	1	0	0	0	1	1	1	0	0	0	0
JHI-Hv50k-2016-504650	0	1	0	1	1	0	0	1	1	0	0	0	0	0	0	1	0	1	0	0	0	0	0	1	0	1	1	0	0	1	0	0	0	1	0	0	0	0	1	0	0	0	1	1	1	1	0	0	0
JHI-Hv50k-2016-504766	0	1	0	1	1	0	0	1	1	0	0	0	0	0	0	1	0	1	0	0	0	0	0	1	0	1	1	0	0	1	0	0	0	1	0	0	0	0	1	0	0	1	1	1	1	1	0	0	0
SCRI-RS-196730	0	1	0	1	1	0	0	1	1	0	0	0	0	0	0	1	0	1	0	0	0	0	0	1	0	1	1	0	0	1	0	0	0	1	0	0	0	0	1	0	0	1	1	1	1	1	0	0	0
JHI-Hv50k-2016-505556	0	1	0	1	1	0	0	1	1	0	0	0	0	0	0	1	0	1	0	0	0	0	0	1	0	1	1	0	0	1	0	0	0	1	0	0	1	0	1	0	0	1	1	1	1	1	0	0	0
JHI-Hv50k-2016-505671	0	1	0	1	1	0	0	1	1	0	0	0	0	0	0	1	0	1	0	0	0	0	0	1	0	1	1	0	0	1	0	0	0	1	0	0	1	0	1	1	0	1	1	1	1	1	0	0	0
SCRI-RS-1383	0	1	0	1	1	0	0	1	1	0	0	0	0	0	0	1	0	1	0	0	0	0	0	1	0	1	1	0	0	1	0	0	0	1	0	0	1	0	1	1	0	1	1	1	1	1	0	0	0
SCRI-RS-151523	0	1	0	1	1	0	0	1	1	0	0	0	0	0	0	1	0	1	0	0	0	0	0	1	0	1	1	0	0	1	0	0	0	1	0	0	1	0	1	1	0	1	1	1	1	1	0	0	0
JHI-Hv50k-2016-506492	0	1	0	1	1	0	0	1	1	0	0	0	0	0	0	1	0	1	0	0	0	0	0	1	0	1	1	0	0	1	0	0	0	1	0	0	1	0	1	1	0	1	1	1	1	1	0	0	0
JHI-Hv50k-2016-506832	0	1	0	1	1	0	0	0	1	0	0	0	0	0	0	1	0	1	0	0	0	0	0	1	0	1	1	0	0	1	0	0	0	1	0	0	1	0	1	1	0	1	1	1	1	1	0	0	0
BOPA1-6470-1005	0	1	0	1	1	0	0	0	1	0	0	0	0	0	0	1	0	1	0	0	0	0	0	1	0	1	1	0	0	1	0	0	0	1	0	0	1	0	1	1	0	1	1	1	1	1	0	0	0
SCRI-RS-235853	0	1	0	1	1	0	0	0	1	0	0	0	0	0	0	1	0	1	0	0	0	0	0	1	0	1	1	0	0	1	0	0	0	1	0	0	1	0	1	1	0	1	1	1	1	1	0	0	0
SCRI-RS-151387	0	1	0	1	1	0	0	0	1	0	0	0	0	0	0	1	0	1	0	0	0	0	0	1	0	1	1	0	0	1	0	0	0	1	0	0	1	0	1	1	0	1	1	1	1	1	0	0	0
JHI-Hv50k-2016-508161	0	1	0	1	1	0	0	0	1	0	0	0	0	0	0	1	0	1	0	0	0	0	0	1	3	1	1	0	0	1	0	0	0	1	0	0	1	0	1	1	0	1	1	1	1	1	0	0	0
SCRI-RS-181575	0	1	0	1	1	0	0	0	1	0	0	0	0	0	0	1	0	1	0	0	0	0	0	1	3	1	1	0	0	1	0	0	0	1	0	0	1	0	1	1	0	1	0	1	1	1	0	0	0
SCRI-RS-187873	0	1	0	1	1	0	0	0	1	0	0	1	0	0	0	1	0	1	0	0	0	0	0	0	3	1	1	1	0	1	0	0	0	1	0	0	1	0	1	1	0	1	0	1	1	1	0	0	0
SCRI-RS-180889	0	1	0	1	1	0	0	0	1	0	0	1	0	0	0	1	0	1	0	0	0	0	0	0	3	1	1	1	0	1	0	0	0	1	0	0	1	0	1	1	0	1	0	1	1	1	0	1	0
JHI-Hv50k-2016-509417	0	1	0	1	1	0	0	0	1	0	0	1	0	0	0	1	0	1	0	0	0	0	0	0	0	1	1	1	0	1	0	0	0	1	0	0	1	0	1	1	0	1	0	1	1	1	0	1	0
SCRI-RS-162972	0	1	0	1	1	0	0	0	1	0	0	1	0	0	0	1	0	1	0	0	0	0	0	0	3	1	1	1	0	1	0	0	0	1	0	0	1	0	1	1	0	1	0	1	1	1	0	1	0
JHI-Hv50k-2016-510965	0	1	0	1	1	0	0	0	3	0	0	1	0	0	0	1	0	1	0	0	0	0	0	0	1	1	1	1	0	1	0	0	0	1	0	0	1	0	1	1	1	1	0	1	0	1	0	1	3
SCRI-RS-237742	0	1	0	1	1	0	0	0	1	0	0	1	0	0	0	1	0	1	0	0	0	0	0	0	1	1	1	1	0	1	0	0	0	1	0	0	1	0	1	1	1	1	0	1	0	1	0	1	3
JHI-Hv50k-2016-511341	0	1	0	1	1	0	0	0	1	0	0	1	0	0	0	1	0	1	0	0	0	0	0	0	1	1	1	1	0	1	0	0	0	1	0	0	1	0	1	1	1	1	0	1	0	1	0	1	1
SCRI-RS-164623	0	1	0	1	1	0	0	0	1	0	0	1	0	0	0	1	0	1	0	0	0	3	0	0	1	1	1	1	0	1	0	0	0	1	0	0	1	0	1	1	1	1	0	1	0	1	0	1	1
BOPA1-7356-1241	0	1	0	1	1	0	0	0	1	0	0	1	0	0	0	1	0	1	0	0	0	3	0	0	1	1	1	1	0	1	0	0	0	1	0	0	1	0	1	1	1	1	0	1	0	1	0	1	1
SCRI-RS-140282	0	1	0	1	1	0	0	0	1	0	0	1	0	0	0	1	0	1	0	0	0	3	0	0	1	1	1	1	0	1	0	1	0	1	0	0	1	0	1	1	0	1	0	0	0	1	0	1	1
SCRI-RS-179575	0	1	0	1	1	0	0	0	1	0	0	1	0	0	0	1	0	1	0	0	0	3	0	0	1	1	1	1	0	1	0	1	0	1	0	0	1	0	1	1	0	1	1	0	0	1	0	1	1
SCRI-RS-183593	0	1	0	1	1	0	0	0	1	0	0	1	0	0	0	1	0	1	0	0	0	1	0	0	1	1	1	1	0	1	0	1	0	1	0	0	1	0	1	1	0	3	1	0	0	1	0	1	1
BOPA1-93-413	0	1	0	1	1	0	0	0	1	0	0	1	0	0	0	1	0	1	0	0	0	1	0	0	1	1	1	1	0	1	0	1	0	1	0	0	1	0	1	1	0	3	1	0	0	1	0	1	1
JHI-Hv50k-2016-513782	0	1	0	1	1	0	0	0	1	0	0	1	0	0	0	1	0	1	0	0	0	1	0	0	1	1	1	1	0	1	0	1	0	1	0	0	1	0	1	1	0	3	1	0	0	0	0	1	1
SCRI-RS-200086	0	1	0	1	1	0	0	0	1	0	0	1	0	0	0	1	0	1	0	0	0	1	0	0	1	1	1	1	0	1	0	1	0	1	0	0	1	0	1	1	0	3	1	0	0	0	0	1	1
BOPA1-ABC11252-1-2-254	0	1	0	1	1	0	0	0	1	0	0	1	0	0	0	1	0	1	0	0	0	1	0	0	1	1	1	1	0	1	0	1	0	1	0	0	1	0	1	1	0	3	1	0	0	0	0	1	1
SCRI-RS-213791	0	1	0	1	1	0	0	0	1	0	0	1	0	0	0	1	0	1	0	0	0	1	0	0	1	1	1	1	0	1	0	1	0	1	0	0	1	0	1	1	0	3	1	0	0	0	0	0	1
SCRI-RS-120720	0	1	0	1	1	0	0	0	1	0	0	1	1	0	0	1	0	1	0	0	0	1	0	0	1	1	1	1	0	1	0	1	0	1	0	0	1	0	1	1	0	3	1	0	0	0	0	0	1
JHI-Hv50k-2016-516496	0	1	0	1	1	0	0	0	1	0	0	1	1	0	0	1	0	1	0	0	0	1	0	0	1	1	1	1	0	0	0	1	0	1	0	0	1	0	1	1	0	3	1	0	0	0	0	0	1
JHI-Hv50k-2016-516576	0	1	0	1	1	0	0	0	1	0	0	1	1	0	0	1	0	1	0	0	0	1	0	0	1	1	1	1	0	0	0	1	0	1	0	0	1	0	1	1	0	3	1	0	0	0	0	0	1
JHI-Hv50k-2016-516638	0	1	0	1	1	0	0	0	1	0	0	1	1	1	0	1	0	1	0	0	0	1	0	0	1	1	1	1	0	0	0	1	0	1	0	0	1	0	1	1	0	3	1	0	0	0	0	0	1
JHI-Hv50k-2016-517476	0	1	0	1	0	0	0	0	1	0	0	1	1	1	0	1	0	1	0	0	0	1	0	0	1	1	1	1	0	0	0	1	0	1	0	0	1	0	1	1	0	3	3	0	0	0	0	0	1
BOPA1-2457-2346	0	1	0	1	0	0	0	0	1	0	0	1	1	1	0	1	0	1	0	0	0	1	0	0	1	1	1	1	0	0	0	1	0	1	0	0	1	0	1	1	0	3	3	0	0	0	0	0	1
[truncated: 78 more columns]

## Sheet: TableS6 TR326xPI67 MappingData
Supplementary Table S6: Mapping data input for Qgene of the barley RIL population TR 326 × PI 67381
JHI-Hv50k-2016-2199 1 0 11001111000010011010101100011111010110010110111100010011110011110010111100000010111111000001111001101101010011100101101110010
SCRI_RS_194326 1 2 11001111000010011010001100010111010110010110311110010011110011110010111100000010111111000001111001101101010011100101101110110
JHI-Hv50k-2016-4942 1 4 11001111000110011100001100010111010110010110311110010011110011110010111100000010111111000001111001101101010011110101101110110
JHI-Hv50k-2016-4897 1 4 11001111000110011100001100010111010110010110311110010011110011110010111100000010111111000001111001101101010011110101111110110
SCRI_RS_60145 1 5 11001111000110011100001100010111010110010110311110010011110011110010111000000010111111000001111001101101010011111101111110110
SCRI_RS_162524 1 5 11001111000110011100001100010111010110010111311110010011110011110010111000000010111111000001111001101101010011111101111110110
JHI-Hv50k-2016-8553 1 6 11001111000110011100001101010111010110010111111110010011110011110010111000000011111111000001111001101111010011111101111110110
JHI-Hv50k-2016-9237 1 6 11001111000110011100001103010111010110010111311110011011110011110010111000000011111111000001111001101111010011111101111110110
JHI-Hv50k-2016-9842 1 6 11001111000110011100001103010111010110010111311110011011110011110010111000000011111111000001111001101111010011111101101110110
JHI-Hv50k-2016-9963 1 6 11001111000110011100001103010111010110010111311110011011110011110010111000000011111111000001111001101111010011111101101110010
JHI-Hv50k-2016-10222 1 8 11001111100110011100001103010111010110010101011110111011110011110010111000000011111111000001111001101111010011111100101110010
JHI-Hv50k-2016-10336 1 9 11001111110110011100001103010111010110010101011110110011110011110010111000010011111111000001111001101111010011111100101110010
JHI-Hv50k-2016-10391 1 11 11001101110110011100001103010111010110010101011110110011110011010010111000010011111111000001111001101111011011111100101010010
JHI-Hv50k-2016-10642 1 13 11000101110110011100011103010111010010010101011010110011110011010310111000010011111111000001111001101111011011111000101010010
JHI-Hv50k-2016-11028 1 13 11000101110110011100011113010111010010010101011010110011110011010310111000010011111111000001111001101111011011111000101010010
JHI-Hv50k-2016-11229 1 14 11000101110110011100011113010111011010010101011010110011110011010310111000010011111111000001111001101111011011111001101010010
JHI-Hv50k-2016-11646 1 14 11000101110110011100011113010111011010010101011010110011110011010310111000010011111111000001101001101111011011111001101010010
JHI-Hv50k-2016-11768 1 15 11000001110110011100011013010011011010010101011010110011110011010310111000010011111111000001101001101111011011111001101010010
JHI-Hv50k-2016-12117 1 17 11000001110110011100011011110011011011010101011010110001110011010110111000010010111111000001101001101111011011111001101010010
JHI-Hv50k-2016-12802 1 18 11000001110110011100001011111011011011010101011010110001110011010110111000010010111111000001101001101111011010111001101010010
BOPA2_12_30877 1 18 11000001110110011100001011111011011011011101011010110001110011010110111000010010111111000001101001101111011010111001101010010
JHI-Hv50k-2016-12866 1 19 11000000110110011100001011111011011011011101011010110001110011010110111000010010011111000001101001101111011010111001101010010
JHI-Hv50k-2016-12930 1 19 11000000110110111100001011111011011011011101011010110001110011010110111000010010011111000001101001101111011010111001101010010
JHI-Hv50k-2016-12956 1 19 11000000110110111100001001111011011011011101011010110001110011010110111000010010011111000001101001101111011010111001101010010
JHI-Hv50k-2016-13004 1 19 10000000110110111100001001111011011011011101011010110001110011010110111000010010011111000001101001101111011010111001101010010
BOPA1_6792-1945 1 21 10000001110111111100001001111011011011011100011010110001110011010110111100010010011111000001101001101111011010111001101010010
SCRI_RS_169091 1 22 10010001110111111100001001111011011001011100011010110001110011010110111100010010011111000001101001101111011010111001101010010
JHI-Hv50k-2016-14617 1 23 10010001110111311100001001101011011001011100011010110001110011010110111100010010011111000001101001111111011010111001101010110
BOPA1_5318-436 1 24 10010001110111311100001001101011011001011100011010110001110011010110101100010010011111000001101001111111010010111001111010110
JHI-Hv50k-2016-14683 1 25 00010001110111311100001001101011011001011100011010110001110011010110100100010010011111000001101001111111010010111001111010110
JHI-Hv50k-2016-14788 1 27 00010001110111311100011000101011011001011100011010110001110011010110100100010010001011000101101001111111010010111001111010110
JHI-Hv50k-2016-14899 1 26 00010001110111311100001000101011011001011100011010110001110011010110100100010010011111000101101001111111010010111001111010110
JHI-Hv50k-2016-15027 1 27 00010001110111011100010000101011011001011100011010110001110011010110100100010010001011000101101001111111010010111001111010110
JHI-Hv50k-2016-15118 1 27 00010003110111011100010000101011011001011100011010110001110011010110100100010010001011000101101001111111010011111001111010110
JHI-Hv50k-2016-15206 1 27 00010003110111011100010000101011011001011100011010110001110011010110100100010010001011000101101001111111010011111001111010100
JHI-Hv50k-2016-15317 1 27 10010003110111011100010000101011011001011100011010110001110011010110100100010010001011000101101001111111010011111001111010100
JHI-Hv50k-2016-15407 1 27 10010003110111011100010000101011011001011100011010110001110011010010100100010010001011000101101001111111010011111001111010100
JHI-Hv50k-2016-16125 1 32 00010001110111011111010000101011011001010100011110110001110011000010101110010010011111000111101001111111010001111001111013100
JHI-Hv50k-2016-16143 1 33 00010001110111011110010000101011011001010100011110110001110011000010101110010010011101000111101001111111010001111001111013100
JHI-Hv50k-2016-16250 1 33 00010001110111011110010000101011011001010100011110110001110011000010001110010010011101000111101001111111010001111001111013100
JHI-Hv50k-2016-16839 1 34 00010003110111011110000000131011011001010100010110110001113011000010001110010010011100000111101001111111010101111001111013100
JHI-Hv50k-2016-16624 1 34 00010003110111011110010000101011011001010100010110110001113011000010001110010010011100000111101001111111010101111001111013100
JHI-Hv50k-2016-17042 1 35 00010000110311001110000000131011011001010100130110110001110011000010001110010010011100000111101001111111000101111001111010100
JHI-Hv50k-2016-17218 1 37 00010000110311001110000000031011011001010100130110110001113011000010001110010010001000000111101001111111000101111001111010101
JHI-Hv50k-2016-17441 1 37 00010000110311001110000000031011011001010100130010110001113011000010001110010010001000000111101001111111000101111001111010101
BOPA2_12_30336 1 37 00010000110311001110000000031011011001010100130010110001113011000010001010010010001000000111101001111111000101111001111010101
JHI-Hv50k-2016-17526 1 37 00030000110311001110000000031011011001010100130010110001103011000010001010010010001000000111101001111111000101111001111010101
JHI-Hv50k-2016-17967 1 37 00030000110311001110000000031011011001010100130010110000103011000010001010010010001000000111101001111111000101111001111010101
JHI-Hv50k-2016-18400 1 37 00030000110311001110000000031011011001010100130010110000103011000010001010010010001000000111101001110111000101111001111010101
JHI-Hv50k-2016-18529 1 37 00030000110311001110000000031011011001010100130010110000103011000010001010010010001000000111101001110111000101110001111010101
JHI-Hv50k-2016-18534 1 37 00030000110311001110000000031011011001010100330010110000103011000010001010010010001000000111111001110111000101110001111010101
BOPA1_2265-363 1 37 30030000110311001110000000030011011001010100110010110000103011000010001010010010001000000111111001110111000101110001111010101
BOPA1_5019-879 1 37 00000000110011001110000000000011011001010100110010110000100011000010101010010010001000000111111001110111000101110001111010101
JHI-Hv50k-2016-20069 1 37 30030000110311001110000000030011011001010100110010110000103011000010101010010010101000000111111001110111000101110001111010101
JHI-Hv50k-2016-20391 1 37 30030000110111001110000000030011010001010100110010110000103011000010101010010010101000000111111001110111000101110001111010101
JHI-Hv50k-2016-23595 1 37 10010000110111001110000000030011010001010100110010110000103011000010101010010010101000000111111001110111000001110001111010101
JHI-Hv50k-2016-25062 1 37 30030000110111001110000000030011010101010100110010110000103011000010101010010010101000000111111001110111000001110001111010101
JHI-Hv50k-2016-26439 1 38 30030000010111001110000000030011010101010100110010110000103011000010101010010010101000000111111001110111000001111001111010101
JHI-Hv50k-2016-28315 1 38 30030000010111001130000000000011010101010100110010110000100011000010101010010010101000000111111001110111000031111000111010101
SCRI_RS_156506 1 38 30030000010111001130000000000011010101010100110010110000100011000010101010010010101000000111111001110111000031110000111010101
JHI-Hv50k-2016-29539 1 38 30030000010111001130000000000011010101010100110010110000100011000010101010010010101000000111111001110111000031111000111010101
JHI-Hv50k-2016-29753 1 38 30030000010111001130000000000011010101010100110010010000100011000010101010010010101000000111111001110111000031111000111010101
JHI-Hv50k-2016-30240 1 38 30030000110111001130000000000011010101010100110010010000100011000010101010010010101000000111111001110111000031111000111010101
JHI-Hv50k-2016-31323 1 38 30030000110111001100000000000011010001010100110010010000100011000010101010010010101000000111111001110111000031111000111010101
JHI-Hv50k-2016-31799 1 38 30010000110111001100000000000011010001010100110010010000100011000010101010010010101000000111111001110111000031111000111010001
JHI-Hv50k-2016-31832 1 38 30010000110111001100000000000011010001110100110010010000100011000010101010010010101000000111111001110111000031111000111010001
JHI-Hv50k-2016-32560 1 38 30010000110111001100000000000011010001110100110010010000100011000010101010010010001000000111111001110111000031111000111010001
JHI-Hv50k-2016-32893 1 38 30010000110111001100000000000011010001110100110010010000100011000010100010010010001000000111111001110111000031111000111010001
JHI-Hv50k-2016-33161 1 38 30010000110111001100000000000011010001110100110010010000100011000010100010010010001000000110111001110111000031111000111010001
JHI-Hv50k-2016-33389 1 38 30010000110111001100000000000011010001110100110010010000100011000010000010010010001000000110111001110111000031111000111010001
JHI-Hv50k-2016-34230 1 38 10010000110111001100000000000011010001110100110010010000100011000010000010010010001000000110111001110111000031111000111010101
JHI-Hv50k-2016-34522 1 38 10010000110111001100000000000011010001110100110010010000100011000010000010010010001000000110111001110111000031111000101010101
JHI-Hv50k-2016-35714 1 41 10010000110111101100000000000011010001110100110010010000100011010010100010010010001000000010111001110111000111111000101010111
JHI-Hv50k-2016-35809 1 42 10010000110111101100000000000011010001110100110010010000000011010010000010010010001000000010111001110111000111111000101010111
JHI-Hv50k-2016-35883 1 42 10010000110111101100000000000111010001110100110010010000000011010010000010010010001000000010111001110111000111111000101010111
JHI-Hv50k-2016-36270 1 42 10010000110111101100000000000111010001110100110010010000000011010010000010010010000000000010111001110111000111111000101010111
BOPA2_12_10166 1 43 10010000110111101100000000000111010001110100111010010000000011010010000010010010000000000010111001110111000111111000001010111
JHI-Hv50k-2016-36433 1 43 10010000110111101100000000000111010001110100111010010000000011010010100010010010000000000010111001110111000111111000001010111
BOPA1_1670-369 1 45 10010000110111101100000001000111010001010110111010010000000011010010100010010010000000000010111001100111000011111000001010111
JHI-Hv50k-2016-37026 1 45 10010000110111101100000001000111010001010110111010010000000011010010100010010010000000000010111001100111000011111000001010101
JHI-Hv50k-2016-37094 1 46 10010000110111101100000001000111011001010110110010010000000011010010100010010010000000000010111001100111000011111000001010101
JHI-Hv50k-2016-37148 1 47 10010000110111111100000001000111011001010110110010010000000011010010100010010000000000000010111001100111000011111000001010101
JHI-Hv50k-2016-37296 1 47 10010000110111111100000001000111011001010110110010010000000011010010100010010000000000000010111000100111000011111000001010101
JHI-Hv50k-2016-37481 1 48 10010000110111111100000001000111011001010110110010010000000011010010100010010000000000000010111000100110000011111001001010101
SCRI_RS_160234 1 49 11010000110111111100000001000111011001010110130010010001010011010010100010010000000000000010111000100110000011111001001010101
BOPA1_6655-978 1 49 11010000110111111100100001000111011001010110130010010001010011010010100010010000000000000010111000100110000011111001001010101
BOPA1_12492-541 1 51 11010000110111110100100001000111011001010100130010010001010011010010100010010000000000000010111000100110100011111001001110101
JHI-Hv50k-2016-37615 1 51 11010000110111110100100001000111011001010100130010010001010011010010100010110000000000000010111000100110100011111001001110101
JHI-Hv50k-2016-37631 1 52 11010000110111110100100001000111011001010100130010010001010011010010100010110000000000001013111100100110100011111001001110101
JHI-Hv50k-2016-37871 1 60 01010001110101110100110000001111010001010100130010011000010010000010100010110001010100001013111100100110100001101001001111101
JHI-Hv50k-2016-38034 1 60 01010001110101110100110000001111010001010100130010011000010010000010100010110001010100001013111100100110100000101001001111101
SCRI_RS_236576 1 60 01010001110101110100110000001111010001010100110010011000010010000010100010110001011100001013111100100110100000101001001111101
JHI-Hv50k-2016-39014 1 60 01010001110101100100110000001111010001010100110010011000010010000010100010110001011100001013111100100110100000101001001111101
JHI-Hv50k-2016-39019 60 01010001110101100100110000001111010001010100110010011000010011000010100010110001011100001013111100100110100000101001001111101
JHI-Hv50k-2016-39220 1 60 01010001110101100100110000001111010011010100110010011000010011000010100010110001011100001013111100100110100000101001001111101
JHI-Hv50k-2016-39281 1 60 01010001110101100100110000001111010011010100010010011000010011000010100010110001011100001013111100100110100000101001001111101
JHI-Hv50k-2016-39526 1 60 01010001110101100100110000001111010011010100010010011000010011000010100010010001011100001013111100100110100000101001001111101
JHI-Hv50k-2016-40820 1 61 01010001110101100100110000001111010011010100010010011000010011000010100000010001011100001013111100100110000000101001001111101
JHI-Hv50k-2016-40910 1 62 01010001110101100100110000001111010011010100010010011000013111000010100000010001011100001013111100100110310000101001001111101
JHI-Hv50k-2016-41046 1 63 01010001111301100100110000001111010011010000010010011000013111000010100000000001011100001013111100100110310000101001001111101
JHI-Hv50k-2016-41432 1 63 01010001111301100100110000001111010011010000010010011000013111000010100000000001011100101013111100100110310000101001001111101
JHI-Hv50k-2016-41782 1 64 01010001111301100100110000001111010011010000010010011000013111000010100000000001011101101013111100100110311000101001001111101
JHI-Hv50k-2016-42071 1 64 01010001111301100100110100001111010011010000010010011000013111000010100000000001011101101013111100100110011000101001001111101
JHI-Hv50k-2016-42205 1 64 01010001111301100100110100001111010011010000010010011000013111000010101000000001011101101013111100100110011000101001001111101
JHI-Hv50k-2016-42801 1 65 01010001111301110100110100001111010011010000010010011000013111000010001000000001011101101013111100100110011000101001001111101
JHI-Hv50k-2016-43178 1 66 01010001111301110100110100001111010011010000010010011000013111000010001000000001011101101013111100100110001000101001001011101
SCRI_RS_188909 1 66 01010001111301110100110100011111010011010000010010011000013111000010001000000001011101101013111100100110001000101001001011101
JHI-Hv50k-2016-43435 1 66 01010001111301110100110100011111010011010000010010011000013110000010001000000001011101101013111100100110001000101001001011101
JHI-Hv50k-2016-43790 1 67 01010001111301110100110100011111010011010000010010011000013110000011001000000001011101101003111100100110001000001001001011101
JHI-Hv50k-2016-43846 1 66 01010001111001110100110100011111010011010000010010011000010110000010001000000001011101101010111100100110001000001001001011101
JHI-Hv50k-2016-44011 1 67 01010001111301110100110100011111010011010000010010011000013110000011101000000001011101101003111100100110001000001001001011101
JHI-Hv50k-2016-45022 1 68 01010001111301110100110100011111010011010000010010011001013110000011101000100001011101101003111100100110001030001001001011101
JHI-Hv50k-2016-45487 1 68 11010001111301110100110100011111010011010000010010011301013110000011101000100001011101101000111100100110001000001001001011101
SCRI_RS_141421 1 68 11010001111301110100110100011111010011010000010010011001011110000011101000100001011101101000111100100110101000001001001011101
JHI-Hv50k-2016-46372 1 68 11010001111301110100110100011111010011010000010010011001011110000011101000100001011101101000111100100110101000000001001011101
JHI-Hv50k-2016-46615 1 68 11010001111301110100110100011111010011010000010010011001011110000011101000101001011101101000111100100110101000000001001011101
JHI-Hv50k-2016-46998 1 68 11010001111301110100110100011111010011010000010010010001011110000011101000101001011101101000111100100110101000000001001011101
JHI-Hv50k-2016-47125 1 68 11010001111301110100110100011111010011010000010010010001001110000011101000101001011101101000111100100110101000000001001011101
JHI-Hv50k-2016-47250 1 68 11010001111301110110110100011111010011010000010010010001001110000011101000101001011101101000111100100110101000000001001011101
JHI-Hv50k-2016-47368 1 69 11010001111301110110110100011101010011010000010110010001001110000011101001101001111101101000111100100110101000000001001011101
JHI-Hv50k-2016-47513 1 69 11010001111301110110110100011101010011010000010110010001001110000011101001101001011101101000111100100110101000000001001011101
JHI-Hv50k-2016-47595 1 69 11010001111301110110110100011101010011010000010110010001001110100011101001101001111101101000111100100110101000000001001011101
JHI-Hv50k-2016-47717 1 71 11010001111301110110110100011101010011011010110110010001101110100011101001101001111101101000111100100110101000000001001011101
JHI-Hv50k-2016-48069 1 72 11010001111301110110110100001101010011011010110110010001101110100011101001101001111101101000111100100110101000000000001011101
JHI-Hv50k-2016-48112 1 72 11010001111301110110110100001101010011011010110110010001101110100011101001101001110101101000111100100110101000000000001011101
JHI-Hv50k-2016-48696 1 72 11010001111301110110110100001101010011011010110110010001101110100011101001101001110101101000111100100111101000000000001011101
JHI-Hv50k-2016-48752 1 72 11011001111301110110110100001101010011011010110110010001101110100011101001101001110101101000111100100111101000000000001011101
JHI-Hv50k-2016-49722 1 75 11011001111101110111110100001111010011010110110110010001101110100011101001101001110101100000111100100011101000000000011011101
JHI-Hv50k-2016-50139 1 78 10011000111101110111110100001111000011010110110110010001101110110011101001300001110101100000111100101011101000000000011111101
JHI-Hv50k-2016-50422 1 81 10011000111101010111111100001111000011010110100111010001101110010011101001300001110101100000111100101010101000000000011111100
JHI-Hv50k-2016-50646 1 81 10011000111101010111111100001111000011010110100111010001101110010011101001300001110101100000111101101010101000000000011111100
JHI-Hv50k-2016-50906 1 81 10011000111101010111111100001111001011010110100111010001101110010011101001300001110101100000111101101010101000000000011111100
JHI-Hv50k-2016-50954 1 82 10011000111111010111111100001111001011010110100111011001101110010011101001300001110101100000111101101010101000000000011111100
JHI-Hv50k-2016-51136 1 83 10011000111111010111110100001111001011010110100111011001101110010011101001300001110101100000111101101010101000000000011011100
JHI-Hv50k-2016-51199 1 83 10011000111111010111110100001111001011010110100111011001101110010011101001300001110101101000111101101010101000000000011011100
JHI-Hv50k-2016-51428 1 83 10011000111111010111110100001111001011010110100111011001101110010011101001300001110101101000111101101010101000000100011011100
JHI-Hv50k-2016-52080 1 83 10011000111111010111110100001110001011010110100111011001101110010011101001300001110101101000111101101010101000000100011011100
JHI-Hv50k-2016-52119 1 83 10011000111111010111110100001110001011010110100111011001101110010011101001300001110101101000011101101010101000000100011011100
JHI-Hv50k-2016-52623 1 85 10011000111110010111110100001110001001010110110111011001101110010011101001300001110101101000011101101010101000000100010011100
SCRI_RS_130577 1 85 10011000111110010111110100001110001001010110110111011001101110010011101001300001110101101000011101101010101010000100010011100
JHI-Hv50k-2016-54041 1 88 01011000111110010111110101001110001001010110110111011001103110010011111001300001110101101000011101101010101011001100010011100
SCRI_RS_138629 1 88 01011000111110010111110101001110001001010110110111011001103110010011111001300001111101101000011101101010101011001100010011100
JHI-Hv50k-2016-54260 1 88 01011000111110010111110101001110001001010110110111011001103110010011111001300001111101101000011101101010101011001100010011100
JHI-Hv50k-2016-54613 1 88 01011000111110010111110101101110001001010110110111011001103110010011111001300001111101101000011101101010101011001100010011100
JHI-Hv50k-2016-55341 1 89 01011000111110010111110101001110001001010110110111011001103110010011111001310001111101101010011101101010101011001100010011100
JHI-Hv50k-2016-55662 1 89 01011000111110010111110001001110001001010110110111011001103110010011111001310001111101101010011101101010101011001100010011100
JHI-Hv50k-2016-55865 1 89 01011000111110010111110001101110001001010110110111011001100110010011111001010001111101101010011101101010101011001100010011100
JHI-Hv50k-2016-56688 1 90 01011000111110010111110001101110001001010110110111011001101110110011111001110001111101101010011111101010101011001100010011100
JHI-Hv50k-2016-56732 1 90 01011000111110010111110001101110001001010110110111011001101110110011111001310001111101101010011101101010101011001100010011100
JHI-Hv50k-2016-58514 2 0 10010111001110111010000100110101111010100110101100011110010101101101001011110110101001011101111001100000111100010101011010010
JHI-Hv50k-2016-60597 2 0 00010111001110111010000100110101111010100110101100011110010101101101003011110110101001011101111001100000111100010101011010010
JHI-Hv50k-2016-62306 2 0 00010111001110111010000100110101111010110110101100011110010101101101000011110110101001011101111001100000111100010101011010010
JHI-Hv50k-2016-62455 2 1 00010111001110111010000100110101111010110110101100011110010101101100000011100110101001011101111001100000111100010101011010010
JHI-Hv50k-2016-62546 2 2 00010111001110111010000000110101111010110110101100011110010101101100000011100110101001011101111001100001111101010101011010010
SCRI_RS_168604 2 2 00010111001110111010000000110101111010110110101100011110010101101100000011100100101001011101111001100001111101010101011010010
SCRI_RS_187012 2 2 00010111001110111010000000110101111010110110101100011110010101101100001011100100101001011101111001100001111101010101011010010
SCRI_RS_213799 2 2 00010111001110111010000000110101111010110110111100311110010101101100001011100100101001011101111001100001111101010101011010010
JHI-Hv50k-2016-64719 2 2 00010111001110111010000000110101101010110110111100311110010101101100001011100100101001011101111001100001111101010101011010010
JHI-Hv50k-2016-65610 2 2 00110111001110111010000000110101101010110110113100311110010101101100001011100100101001011101111001100001111101010101011010010
JHI-Hv50k-2016-66683 2 2 00110111001110111010000000110101101010110110113100311113010101100100001011100100101001011101111001100001111101010101011010010
JHI-Hv50k-2016-66747 2 3 00110110001010111010000000110101101010110110113100011113010101100100001011100100101001011101111001100001111101010101011010010
JHI-Hv50k-2016-67059 2 3 00110110001010111010000000110101101010110110113100011113010101100100001011100100101001011101111001000001111101010101011010010
JHI-Hv50k-2016-67451 2 3 00110110001010111010000000110101101010110110113100011113010101100000001011100100101001011101111001000001111101010101011010010
JHI-Hv50k-2016-67492 2 3 00110110001010111010000000110101101010110110113100011113010131100010001011100100101001011101111001000001111101010101011010010
JHI-Hv50k-2016-67989 2 5 30110110001010111010000010110101101010110110113100011113010131000010001011100100101001011101101001000001111100010101011010010
JHI-Hv50k-2016-68007 2 5 30110110001010111010000010110101101010110110113100011113010131000010001011100100101001011101101001000001101100010101011010010
JHI-Hv50k-2016-68102 2 5 30110110001010111010000010110111101010110110113100011113010131000010001011100100101001011101101001000001101100010101011010010
SCRI_RS_159158 2 5 30110110001000111010000010110111101010110110111100011113010111000010001011100100101001011101101001000001101100010101011010010
JHI-Hv50k-2016-69930 2 7 00110130001000111010000010110111101010110110110100011110010101000010001011100100101001011101101011000001101000010101011010010
SCRI_RS_106759 2 7 30110110001000111010000010110111101010110110113100011113010131000010001011100100101001011001101011000001101000010101011010010
SCRI_RS_149462 2 7 30110110001000111010000010110111101010110110113100011113010131000010001011100100101001011001101011000001101000010101001010010
JHI-Hv50k-2016-71117 2 7 30110110001000111010000010110111101010110110113100011113010131000010001011100100100001011001101011000001101000010101001010010
JHI-Hv50k-2016-71174 2 8 30110110001000110010000010110111101010110110113100011113010131000010001011100100100001011001101111000001101000010101001010010
SCRI_RS_66401 2 9 10110110001000110010000010110111101010110110111100011111010111000010001011100100100001011001101111000031101010010111001010010
JHI-Hv50k-2016-71791 2 9 30110110001000110010000010010111101010110110113100011113010111000010001011100100100001011001101111000001101010010111001010010
JHI-Hv50k-2016-71813 2 9 30110110001000110010000010010111101010110110113101011113010111000010001011100100100001011001101111000001101010010111001010010
JHI-Hv50k-2016-71911 2 10 30113110001000110000000010010111101010110110113101011111010111000010001011100100100001011001101111000001101010010111001010110
JHI-Hv50k-2016-72315 2 11 30110000001000110000000010010111101010110110110101011111010111000010001011100101100001011001101111000001101010010111001010110
JHI-Hv50k-2016-72460 2 11 30113000001000110000000010010111101010110110113101011111010111000010001011100101100001311001101111000001111010010111001010110
SCRI_RS_145190 2 11 30110000001000110000000010010111101010110010113101011111010111000010001011100101100001311001101111000001111010010111001010110
JHI-Hv50k-2016-74372 2 16 30111001001000110000000000010111101010110010111111111111010101000000001011000101100001311001111111001000111010010111001010110
SCRI_RS_188893 2 16 30111001001000110000000000010111101010110010111111111111010101000100001011000101100001311001111111001000111010010111001010110
SCRI_RS_186448 2 17 30111001001000110000000000010111101010110010011111111111010101000000001011000101100001311001111111001000101010010111001010110
JHI-Hv50k-2016-75243 2 17 30111001001100110000000000010111101010110010011111111111010101000000001011000101100001111001111111001000101010010111001010110
SCRI_RS_192657 2 23 30101001001101110000001000010110001010010000011111111111010101000000001000000101101001111001111111001000101010000101000010110
SCRI_RS_110647 2 23 30101001001101110000001000010110001010010000011111111111010101000100001000000101101001111001111111001000101010000101000010110
BOPA1_5652-419 2 23 30101001001101110000001000010110001010010000011111111111010101000100001000000101101001111001111111003000101010000001000010110
BOPA1_864-594 2 23 30101001001101110000001000010110001010010000011111111111010101000100101000000101101001111001111111003000101010000001000010110
JHI-Hv50k-2016-76894 2 24 11101001001101110000001000010110001010010000011111111111010101000100101000000101101001111001111101003000101010000001000010110
BOPA2_12_30748 2 25 11101001001101110000001000010110001010010000011110111111110101000100101000000101101001111001111101003000101010000001000010110
JHI-Hv50k-2016-76931 2 25 11111001001101110000001000010110001010010000011110111111110101000100101000000101101001111001111101003000101010000001000010110
JHI-Hv50k-2016-77166 2 25 11111001001101110000001000010110001010010000011110111111010101003100101000000101101001111001111101003000101010000001000010110
SCRI_RS_215080 2 26 11111001001101110000001000010110001010010000011111111111010101003100101000000101101001111101111101003000101010000001000010110
JHI-Hv50k-2016-77411 2 28 11111001000101110000001000010010101010010000011111111111010100003100101000000101001001111101111101003000101010000001000010110
SCRI_RS_174935 2 29 11111101000101110000001000010010101010010000011111111111010100003100101010000101001001111101111101013000101010000001000010110
SCRI_RS_89851 2 31 11111101000101110000001000010010101010110000011111111111010100003100101010000001001001111101111101013000101011000001000010100
JHI-Hv50k-2016-78157 2 32 11111101000101110000011000010010101010110000011111111111010100103100101010000001001001111001111101013000101011000001000010100
BOPA1_7623-818 2 32 11111101000101110000011000010010101010110000011111111111010100103100101010000001001001111001111111013000101011000001000010100
BOPA1_2651-1774 2 34 11111101010101110000011000010010101010110000011111111111010101101100101010000001001001111101111111013000001011000001000010100
JHI-Hv50k-2016-79433 2 35 11111101010101110000011000010010101010110000001111111111010101101100101010010001001001111101111111013000001011000001000010100
JHI-Hv50k-2016-80336 2 36 11111101010101111000011000010010101010110000001111111111010101101100101110010001001031111101111311013001001011000001000010100
SCRI_RS_152206 2 39 11111101010110111010011000010010101010110000011111110111010101101100101110010001001031111101111111013001001011000001000010101
BOPA2_12_30703 2 39 11111101010010111010011000010010101010110000011111110111010101101100101110010001001031111101111111013001001011000001000010101
JHI-Hv50k-2016-81297 2 40 11111101010010111010011000011010101010110000011111110111010101101100101110010001001011111100111111011001001011000001000010101
JHI-Hv50k-2016-82074 2 40 11111101010010111010011000011010101010110000011111110111010101101100101110010001001031111100111111013001000011000001000010101
JHI-Hv50k-2016-82292 6 56 00100100000110111110010101001110111001011111110110301001010101010100101011110000010101111000000000101011101101001000100101010
SCRI_RS_126877 2 40 11111101010010111010011000011010101010110000011111110111010101101100101310010001001031111100111111013101000011000001000010101
SCRI_RS_224846 2 40 11111101010010111010011000011010101010110000011111110111010101101100101310010001001031111100111111013101000011000001000011101
JHI-Hv50k-2016-90439 2 41 11111101010010111010011000011010101010110000001111110111010003101100101110010001001001111110111111013101000011000001000011101
SCRI_RS_151430 2 41 11111101010010111010011000011010101010110000001111110111010003101100101110010001001001111110111111013100000011000001000011101
BOPA2_12_30042 2 42 11111101000010111010011000011010101110110000001111110111010003101100101110010001001001111110111111013100000011000001000011101
JHI-Hv50k-2016-94898 2 42 11111101000000111010011000011010101110110000001111110111010003101100101110010001001001111110111111010100000011000001000011101
BOPA1_7489-442 2 42 11111101001000111010011000011010101110110000001111110111010003101100101110010001001001111110111111010100000011000001000011101
JHI-Hv50k-2016-98482 2 42 11111101001000111010011000011010101110110000001111110111010003101100101110010001001001111110111111010100001011000001000011101
SCRI_RS_107754 2 43 11111101001010111010111000011010101110110000001111110111010003101100101110010001001001111110111111010100001011000001000011101
SCRI_RS_143213 2 43 11111101001010111010111000011110101110110000001111110111010003101100101110010001001001111110111111010100001011000001000011101
BOPA2_12_10545 2 43 11111101001010111010111000011110101110110000001111110111010001101100101010010001001001111110111311010100001011000001000011101
SCRI_RS_202786 2 44 11111101001011111010101000011110101110110000001111110111010001101100101010010001001001111110111311010100001311000001000011101
SCRI_RS_153531 2 45 11111101001011111010101000011110101110110000001111110111010001101100111010010001001001111110111311010100001311000001000011111
SCRI_RS_212940 2 46 11111101001011111010111000011110101110110000000131110111010001101100111010010001001001111110111311010100101311000001000011111
JHI-Hv50k-2016-100937 611,959,025 2 47 11111101001011111010111000011110101110110000000131110111010001101100111010000001001001111110111311010100101311000001100011111
SCRI_RS_59851 2 47 11111101001011111010111000011110101110110000000131110111010001101100111010000001001001111110111311010100101311000001100111111
JHI-Hv50k-2016-102303 2 47 11311101001011111010111000011110101110110000000131110111010001101100111010000001001001111110111311010100101311100001100111111
SCRI_RS_16995 2 47 11311101001011111010111000011110101110110000000131110111010001101100111010010001001001111110111311010100101311100001100111111
JHI-Hv50k-2016-103188 2 48 11311101001011111010111000011110101110110000000101110111010001100100111010010001001001111110111011011100101011100001000111111
JHI-Hv50k-2016-103596 2 50 11311101001011111010111000011110101110110000000111110111010001100100111010010001001001111110111110011100101110100001000111111
JHI-Hv50k-2016-103647 2 51 11311101001011111010111000011110101110110000000101110111010001100100111010010001001001011110111110011100101110110001000111111
JHI-Hv50k-2016-103807 2 52 11311101001011110010111000011110101110010000000101110111010001100100111010010001001001011110111110011100101110110001000111111
JHI-Hv50k-2016-103841 2 52 11311101001011110010111000011110101100010000000101110111010001100100111010010001001001011110111110011100101110110001000111111
JHI-Hv50k-2016-104062 2 52 11311101001011110110111000011110101100010000000101110111010001100100111010010001001001011110111110111100101110110001000111111
JHI-Hv50k-2016-104181 2 52 11311101001011110010111000011110101100010000000101110111010001100100111010010001001001011110111110111100101110110001000111111
SCRI_RS_219568 2 52 11311101001011110010111000011110101100010000000101110111010001100100111010010001001001011110111110111100101110110001000111111
JHI-Hv50k-2016-104514 2 52 11011101001011110010111000011110101100010000000101110111010001100100111010010001001001010110111110111100101110110001000111111
JHI-Hv50k-2016-104808 2 52 11311101001011110010111000011110101100010000000101110111010001100100111010010001001001010110111110111100101110110001001111111
SCRI_RS_17898 2 52 11311101001011110010111000011110101100010000000101110111010001100100111010010001001001010110111110111100101110110001001111011
SCRI_RS_235874 2 53 11311101001011110010111000011110101100010000000100110111010001100100111010010011001001010110111110111100101110110001001111011
JHI-Hv50k-2016-105719 2 53 11311101001111110010111000011110101100010000000100110111010001100100111010010011001001010110111110111100101110110001001111011
SCRI_RS_158285 2 53 11311101001111110010111000011110101100010000000100110111010001100100111010010011001001010110101110111100101110110001001111011
JHI-Hv50k-2016-106306 2 56 11111101001111110010111000011110101100010010000100110111010001100100001010013011000001010010101110111100100110110001001111011
SCRI_RS_134812 2 56 11111101001111110010111000011110101100010010000100110111010001100100001010013010000001010010101110111100100110110001001111011
SCRI_RS_235860 2 56 11111101001111110010111010011110101100010010000100110111010001100100001010013010000001010010101110111100100110110001001111011
SCRI_RS_4930 2 56 11111101001111110010111010011110101100010010000100110111010001100100011010013010000001010010101110111100100110110001001111011
JHI-Hv50k-2016-106887 2 56 11111101001111110010111010011110101100010010000100110111010001100100011010013010000001010010101110111100100110110001101111011
SCRI_RS_154203 2 56 11110101001111110010111010011110101100010010000100110111010001100100011010013010000001010010101110111100100110110001101111011
JHI-Hv50k-2016-107309 2 56 11110101001111110011111010011110101100010010000100310111010001100100011010013010000001010010101110111100100110110001101111011
SCRI_RS_91810 2 56 11110101001111100011111010011110101100010010000100310111010001100100011010011010000001010010101110111100100110110001101111011
SCRI_RS_88704 2 56 11110101001111100011111010011110101100010010000100310111010000100100011010011010000001010010101110111100100110110001101111011
BOPA1_ConsensusGBS0705-1 2 56 11110101001111100011111010011110101100010010000100310111010000100100011010011010000001010010101111111100100110110001101111011
JHI-Hv50k-2016-107997 2 56 11110101001111100011111010011110101100010010000100310111010000100100011010011010000001010010101111111100100110110001101111011
JHI-Hv50k-2016-108103 2 56 11110101001111100011111010011110101100010010000100310111010000100100011010011010000001010010101111111100100110110001101111111
SCRI_RS_211281 2 57 10110101001111100011111010011110101100010010000100310111010000100100001010011010000001010010101111111100100110110001101111011
SCRI_RS_138463 2 57 10110101001111100011111010011110101100010010000100310111010000100100001010011010000001010010101111111101100110110001101111011
JHI-Hv50k-2016-109308 2 58 10110101001111100011111010011110101100010010000000310111010000100100001010011010000001010010001111111101100110110001101111011
BOPA1_6752-1013 2 58 10110101001111100011101010011110101100010010000000310111010000100100001010011010000001010010001111111101100110110001101111011
JHI-Hv50k-2016-109395 2 58 10110101001111100011101010011110101100010010000000310111010000100100001010001010000001010010001111111101100110110001101111011
JHI-Hv50k-2016-109460 2 60 10110101001111100011101010011113001100010010000000010111010000100100001010001010100001010000001101111101100110110001101101011
JHI-Hv50k-2016-109473 2 60 11110101001111100011101010011113001100010010000000010111010000100100001010001010100001010000001101111101100110110001101101011
BOPA1_2020-539 2 60 11110101001111100011101010011113001100010010000000000111010000100100031010001010100001010000001101111101100110310001101101011
JHI-Hv50k-2016-109902 2 60 11110100001111100011101010011110001100030010000000000111010000100100001010001010100001010000001101111101100110310001101101011
SCRI_RS_172220 2 62 11110100001111100011101010011110103100010010000000000111010000100100001010001010101001010000001100101101100110310001101111010
SCRI_RS_160958 2 62 01110100001111100011101010011110103100010010000000000111010000100100001010001010101001010000001100101101100110310001101111010
JHI-Hv50k-2016-112109 2 63 01110100001111100011101010111110103100010010010000000111010000100100001010001010101001010000101100101101100110310011101111010
JHI-Hv50k-2016-112287 2 63 01110100001111100011101010111110103100010010010000000111010000100100001010001010101001010000001100101101100110310011101111010
BOPA1_5347-585 2 63 01110100001111100011101010111110103100010010010000000111010000100100001010001010101001010000001100101101100110310011101111010
SCRI_RS_4931 2 63 01110100001111100011101010111110103100110010010000000111010000100100001010001010101001010000001100101101100110310011101111010
JHI-Hv50k-2016-113361 2 63 01110100001111100011101010011110103100110010010000000111010000100100001010001010101001010000001100101101100010310011101111010
JHI-Hv50k-2016-113381 2 63 01110100001111100011101010011110103100110010010000000111010000100100001010001010101001010000001100101101100110310011101111010
JHI-Hv50k-2016-113409 2 63 01110100001111100011101010011110103100110010010000000111010000100100001110001010101001010000001100101101100010310011101111010
SCRI_RS_152485 2 63 01110100001111000011101010011110103100110010010000000111010000100100001110001010101001010000001100101101100010310011101111010
BOPA1_7236-1384 2 63 01110100001111000011101010011110103100010010010000000111010000100100001110001010101001010000001100101101100010310011101111010
SCRI_RS_157053 2 63 01110100001111000011101010011110103100010010010100000111010000100100001110001010101001010000001100101101100010310011101111010
JHI-Hv50k-2016-113577 2 63 01110100001111000011101010011110103100010010010100000111010000100100001110001010101001010000000100101101100010310011101111010
BOPA2_12_30480 2 64 01110000001111000011101010011110103100010010010100000111010000100100001110001010101001000000000100101101100010310011101111010
JHI-Hv50k-2016-113735 2 64 01110000001111000011101010011110103100010010010100000111010000100100001110001010101001000000000100101101100010310011111111010
JHI-Hv50k-2016-114156 2 66 01010000001111000011101010011110101100011110003103000111010000100100001110101010101001000000000100101101100010310011111111010
JHI-Hv50k-2016-114240 2 66 01010000001111000011101010011110101101011110003103000111010000100100001110101010101001000000000100101101100010310011111111010
JHI-Hv50k-2016-114861 2 67 01010000001111000011101010011110101001011110003103000111010010100110001110101010101001000000000100101101100010310011111111010
JHI-Hv50k-2016-114879 2 66 01010000001111000011101010011110101001011110003103000111010000100100001110101010101001000000000100101101100010310011111111010
BOPA2_12_30555 2 67 01010000001111000011101010011110101001011110303103000111010010100110001110101010101001000000000100101101100010310010111111010
JHI-Hv50k-2016-115446 2 68 01010000001111000011101010011110101001011110300103000111010010100110000110101010101001000000000100101101100010010010110111010
JHI-Hv50k-2016-115963 2 71 01010000001111000011101010001100101001011110300103000111110010100010000100101010101001000010000100101101100010010030110111010
JHI-Hv50k-2016-118969 2 71 01010000001111000011101010001100101001011110100103001111110010100010000100101010101001000010000100101101100010010030110111010
SCRI_RS_918 2 71 01010000001111000011101010001100101001111110300103001111110010100010000100101010101001000010000100101101100010010030110111010
BOPA2_12_30459 2 71 01010000001111000011101110001100101001111110300103001111110010100010000100101010101001000010000100101101100010010030110111010
JHI-Hv50k-2016-119678 2 72 01010000001111000011101110001100101001111110100103001111110010100010000100101010100001000011000100101101100010010030110111010
SCRI_RS_223905 2 72 01010000001111000011101110001100101001111110100103001111110010100010000100101010000001000011000100101101100010010030110111010
SCRI_RS_156220 2 72 01010000001111000011101110001100101001111110100103001111110010100010010100101010000001000011000100101101100010010030110111010
SCRI_RS_238606 2 73 01010000001111000011101110001100101001111110100103001111110010100010010100101010010101000011000100101101100010010030110111010
SCRI_RS_151349 2 74 01010000001111000011101110101100101001111110100103001111110010100010010100101010010101001011000100101101100010010030110111010
SCRI_RS_610 2 74 01010000001111000010101110101100101001111110100103001111110010100010013100101010010101001011000100101101100010010030110111010
SCRI_RS_206070 2 74 01010000001111000010101110101100101001111110101103001111110010100010013100101010010101001011000100101101100010010030110111010
SCRI_RS_167694 2 74 11010000001111000010101110101100101001111110101103001111110010100010013100101010010101001011000100101101100010010030110111010
JHI-Hv50k-2016-121422 2 74 11010000001111000010101110101100101001111110101103001111110010100010010100101010010101001011000100101101100010010030110011010
SCRI_RS_205571 2 74 11010000001111000010101110101100101001111110101103001111110010100010013100111010010101001011000100101101100010010030110011010
SCRI_RS_155689 2 74 11010000001111000010101110101000101001111110101103001111110010100010013100111010010101001011000100101101100010010030110011010
SCRI_RS_235261 2 74 11010000101111000010101110101000101001111110101103001111110010100010013100111010010101001011000100101101100010010030110011010
SCRI_RS_174214 2 74 11010000101111000010101110101000101001111110101103001111110010100010013100111010010101001011000100001101100010010030110011010
SCRI_RS_224454 2 74 11010000101111000010101110101000101001111110101103001111110010100010013000111010010101001011000100001101100010010030110011010
SCRI_RS_147052 2 74 11010000101111000010101110101000101001111110101103001111110010100010010000111010010101001011010100001101100010010003110011010
JHI-Hv50k-2016-123949 2 74 11010010101111000010101110101000101001111110101103001111110010100010013000111010010101001011010100001101100010010033110011010
SCRI_RS_151129 2 74 11010010101111000010131110101000101001111110101103001111110010100010003000111010010101001011010100001101100010010011110011010
JHI-Hv50k-2016-124316 2 74 01010010101111000010131110101000101001111110101103001111110010100010003000111010010101001011010100001101100010010011110011010
SCRI_RS_152659 2 74 01010010101111000010131110101000101001111110101103001111110010101010003000111010010101001011010100001101100010010011110011010
SCRI_RS_218206 2 74 01010010101111000010101110101000101001101110101103001111110010101010003000111010010101001011010100001101100010010011110011010
JHI-Hv50k-2016-125451 2 74 01010010101111000010101110101000101001101110101100001111110010101010003000111010010101001011010100001101100010000011110011010
JHI-Hv50k-2016-125822 2 74 01010010001111000010101110101000101001101110101103001111110010101010003000111010010101001011010100001101100010000011110011010
JHI-Hv50k-2016-126452 2 75 01010010001111000010101110101000101001101110101003001111110010101010003000111010010101001111010130001101100010000011110011010
SCRI_RS_165373 2 75 01010010001011000010101110101000101001101110101003001111110010101010003000111010010101001111010130001101100010000011110011010
BOPA1_6328-736 2 75 01010010001011000010101110101000101001101110101003001111110010101011003000111010010101001111010130001101100010000011110011010
SCRI_RS_223119 2 75 01010010000011000010101110101000101001101110101003001111110010101011003000111010010101001111010130001101100010000011110011010
SCRI_RS_157504 2 75 01010010000011000110101110101000101001101110101003001111110010101011003000111010010101001111010130001101100010000011110011010
JHI-Hv50k-2016-127720 2 78 01310010000111000110101110101100101001101110101003001110110000101001003000111010010101001111010131001101100010000011110011010
SCRI_RS_144102 2 78 01310010000101000110101110101100101001101110101001001110110000101001003000111010010101001111010131001101100010000011110011010
JHI-Hv50k-2016-128068 2 78 01310010000101000110101110101100101001101100101001001110110000101001003000111010010101001111010131001101100010000011110011010
JHI-Hv50k-2016-129045 2 78 01310010000101003110101110101100101001101100101001001110110000101001001000111010010101001111010111001101100010000001110011010
JHI-Hv50k-2016-129603 2 78 01310010000101003110101110101100101001101100101011001110110000101001001000111010010101001111010111001101100010000001110011010
SCRI_RS_221784 2 78 01310010000101001110101110101100101001101100101011001110110000101001001000111010010101001111010111001101100011000001110011010
BOPA1_4241-445 2 78 01310010000101001110101110001100101001101100101011001110110000101001001000111010010101001111010111001101100011000001110011010
SCRI_RS_215471 2 78 01310010000101001110101110011100101001101100101011001110110000101001001000111010010101001111010111001101100011000001110011010
JHI-Hv50k-2016-131709 2 78 01010010000101001110101110011100101001101100101011001110110000101001011000111010010101001111010111001101100011000001110011010
JHI-Hv50k-2016-132012 2 78 01310010000111001110101110011100101001101100101011001110110000101001011000111010010101001111010111001101100011000001110011010
SCRI_RS_106163 2 78 01310010000111001110101110011100101001101100101011001110110000101001011000111010010101001111010111001101101011000001110011010
SCRI_RS_148699 2 79 01310010000111001110101100011100101001101100101011001110100000101001011000111010010101001111010111001101101011000001110011010
JHI-Hv50k-2016-132505 2 79 01310010000111001110100100011100101001101100101011001110100000101001011000111010010101001111010111001101101011000001110011010
SCRI_RS_7219 2 79 01010010000111001110100100011100101001101100101011001110100000101001011000111000010101001111010111001101101011000001110011010
JHI-Hv50k-2016-134401 2 79 01310010000101001110100100011100101001101100101011001110100000101001011000111000010101001111010111001101101011000001110011010
JHI-Hv50k-2016-134491 2 80 01310010000101001110100100011100101001101100101011001100100000101001011000111000010111001111010111001101101011000001110111010
JHI-Hv50k-2016-134802 2 81 01310010000101001110100100011100101001101100101011001100100000101001011000111000010111111111010111001101101011000001110111010
JHI-Hv50k-2016-135047 2 82 01310010000101001110100100011100101001101100101011001000100000101001011000111000010111111110010111001101101011000001010111010
JHI-Hv50k-2016-135056 2 81 01310010000101001110100100011100101001101100101011001000100000101001011000111000010111131111010111001101101011000001110111010
JHI-Hv50k-2016-135189 2 82 01310010010101001110100100011100101001101100101011001000100000101001011000111000010111131110010111001101101011000001010111010
JHI-Hv50k-2016-135316 2 82 01300010010101001110100100011100101001101100101011001000100000101001011000111000010111131110010111001101101011000001010111010
BOPA2_12_10447 2 83 01300010010101001110100100011100101001101100101011001000100000101001011000111000110111131110011111001101101011000001010111010
BOPA2_12_11368 2 83 01300010010101001110100000011100101001101100101011001000100000101001011000111000110111131110011111001101101011000001010111010
SCRI_RS_161636 2 83 01300010010101001110100010011100101001101100101011001000100000101001011000111000110111131110011111001101101011000001010111010
JHI-Hv50k-2016-137252 2 84 01300000000101001110100010011100101001101100101011001000100000101001011000111000110111131110011111001101101011000001010111010
BOPA1_2052-792 2 84 01300000000101001110100010011100101001101100101011001000100000101001011000111000110111131110011110001101101011000001010111010
SCRI_RS_156819 2 85 01000100000101001110100010011100101011101100101011001000100000101001011000111000111111131110011110001101101011000001010111010
SCRI_RS_153293 2 93 01310100010101111110100010011110101111100101101001001000101000001001011030111000111111131110011010011111101011100011010111010
JHI-Hv50k-2016-139165 2 94 01310100010101111110100010011110101111100101101001001000101000001001011030111000111111111010011010011111101011100011010011010
SCRI_RS_149233 2 96 01310100010101111110100010011110101111100101101000001000001000001001011030111000111111101010011010011111001011100011010011010
SCRI_RS_174051 2 97 01310100010101111110100010011110101111100101101000001000001000001001011030111000111101001010011010011111001011100011010011010
SCRI_RS_172136 2 97 01310100010101111110100010011110101111100100101000001000001000001001011030111000111101001010011010011111001011100011010011010
SCRI_RS_73620 2 97 01310100010101111110100010011110101111100100101000001000001000001001011030111000111101001110011010011111001011100011010011010
SCRI_RS_119848 2 98 01110100010101111110100010011110101111100100101000001000001000001001001030111000111101101110011010011111001011100011010011010
JHI-Hv50k-2016-142124 2 99 01110100010101111110100010011110111111100100101000001000001000001001001030111000111101101110011010011111001011100011110011010
SCRI_RS_169956 2 100 01110100010101111110100110011110111111100110101000001000001000001001001030111000111101101110011010011111001011100011110011010
BOPA1_1344-930 2 100 01110100010101111110100110111110111111100110101000001000001000001001001030111000111101101110011010011111001011100011110011010
SCRI_RS_204579 2 100 01110100010101111110100110111110111111100110101000001000001000001001001030111000111101101110011010011111001011300111110011010
JHI-Hv50k-2016-145032 2 100 01110100010100111110100110111110111111100110101000001000001000001001001030111000111101101110011010011111001011300111110011010
SCRI_RS_186760 2 100 01110100010100111110100110111110111111100110101000001000001100001001001030111000111101101110011010011111001011300111110011010
JHI-Hv50k-2016-146031 2 102 01110000010100111110100110111110111111100110101000001000001101001101001030111000011101101110011010011111001011300011110011010
JHI-Hv50k-2016-149269 3 0 00001110111010010310100011001001000011000001100100101001110000111000031010001001100001011100000010011011101101001101101011011
JHI-Hv50k-2016-149680 3 0 00001110111010010310100011001001000011000001100100101001110000011000031010001001100001011100000010011011101101001101101011011
JHI-Hv50k-2016-150357 3 1 00001110111010010310100011001001000011000001100100111001110000011000031010001001100001011100000010111011101101001101101011011
JHI-Hv50k-2016-150970 3 1 00001110111010010310100011001001003011000001100100111001110000011000031010001001100001011100000010111011101100001101101011011
JHI-Hv50k-2016-151846 3 1 00001110111010010310100011001001003011000001101100111001110000011000031010001001100001011100000010111011101100001101101011011
JHI-Hv50k-2016-152075 3 1 00001110111010010310100011001001003011000001101100111001110001011000031010001001100001011100000010111011101100001101101011011
JHI-Hv50k-2016-152723 3 3 00001110111010010310100011001001001011000001101100110001110001011000031010001001100001011110000010111011101100001101101111111
JHI-Hv50k-2016-152968 3 3 00001110111010010110100011001001001011000001100100110001110001011000031010001001100001011110000010111011101100001101101111111
BOPA2_12_30297 3 4 00001110111010010110100011001001001111000001100100110001110001011000031010001001100001011110000010111011100100001101101111111
SCRI_RS_6682 3 4 00001110111010010110100011001001001111000001100100110001111001011000031010001001100001011110000010111011100100001101101111111
JHI-Hv50k-2016-153137 3 4 00001110111010010110100011001001001111000001100100110001110001011000031010001001100001011110000010111011100100001101101111111
JHI-Hv50k-2016-153623 3 5 00001110111010010110100011000001001111000001100100110001110001011000031010001001100001011110000010101011100100001101101111111
JHI-Hv50k-2016-153756 3 5 00001110111010010110100011000001001111000001000100110001110001011000031010001001100001011110000010101011100100001101101111111
JHI-Hv50k-2016-153862 3 5 00001110111010010110100011000001001111000001000100110001110001011000031110001001100001011110000010101011100100001101101111111
JHI-Hv50k-2016-154092 3 5 00001110111010010110100011000001001111000001000100110001110001011000011110001001100001011110000010101010100100001101101111111
JHI-Hv50k-2016-154122 3 5 00001110111010010110100011000001001111000001000100110001110001011000031110001001100001011110000010101010100100001101111111111
JHI-Hv50k-2016-154553 3 5 00001110111010010110100011000001101111000001000100110001110001011000031110001001100001011110000010101010100100001101111111111
JHI-Hv50k-2016-154725 3 6 00001110111010010110100011001001101111000001000100110101110001011000031110001000100001011110000010101010100100001101111111111
JHI-Hv50k-2016-154830 3 5 00001110111010010110100011001001101111000001000100110001110001011000031110001001100001011110000010101010100100001101111111111
JHI-Hv50k-2016-155002 3 6 00001110111010010110100011001001101111000001000100110101110001011000031110001000100001011110000010101010000100001101111111111
JHI-Hv50k-2016-155191 3 6 00001110111010010110100011001001101111000001000100110101110001011000031110001000100001011110000010101010000100000101111111111
JHI-Hv50k-2016-155465 3 9 00001110011010010110100011001001101111000001000100110101110011011010031010001000100001111110000010101010000100000101111111101
JHI-Hv50k-2016-155489 3 10 00001110011010010110100011001001101111000001000100110101110011011010031010001100100001111110000011101010000100000101111111001
JHI-Hv50k-2016-155518 3 10 00001110011010010110100011001001101111000001000100110101110011011010031010001100100001111110000010101010000100000101111111001
JHI-Hv50k-2016-155753 3 11 00000110011010011110100011001001101111000001000100110101110011011010031010001100100001111110000011101010000100000101111111001
JHI-Hv50k-2016-155784 3 11 00000100011010011110100011001001101111000001000100110101110011011010031010001100000001111110000011101010000100000101111111001
JHI-Hv50k-2016-155973 3 11 00000100011010011110100011001001101111000001000100110101110011011010031010001100100001111110000011101010000100000101111111001
JHI-Hv50k-2016-156361 3 11 00000100011010011110100011001001101111000001000100110101110011011010031010001100000001111110100011101010000100000101111111001
JHI-Hv50k-2016-156563 3 13 00000100011010011110100011001001101111001011000100010101110111011010031010001100000001111110100011101010003100000101111111001
JHI-Hv50k-2016-156577 3 14 00000100001010011110100011001001101111001011000100010101110111011010031010001100000001111110100011100010003100000101111111001
JHI-Hv50k-2016-156603 3 15 00000100011010011110100011001031101110001011000100010101110111011010031010001100000001111111100011101010003100000101111111001
JHI-Hv50k-2016-156624 3 15 00000100011010011110100011001031101111001011000100010101110111011010031010001100000001111111100011101010003100000101111111001
JHI-Hv50k-2016-156676 3 15 00000100011010011110100011001031101111001011000100010101110111011010031010001100000001111110100011101010003100000101111111001
JHI-Hv50k-2016-156788 3 15 00000100011010011110100011001031101110001011000000010101110111011010031010001100000001111111100011101010003100000101111111001
JHI-Hv50k-2016-157074 3 16 00000100011010011110100011001011101110001011000000010101110111011010031010001100000001111111100011100010013100000101111111001
JHI-Hv50k-2016-157411 3 16 00000100011000011110100011001011101110001011030000010101110111011010031010001100000001113111100011100010013100000101111131001
JHI-Hv50k-2016-158166 3 16 00000100011000011110100011001011101110001011030000010101110111011010011010001100000001111111100011100010013100000101011131001
JHI-Hv50k-2016-158676 3 17 00000100011000011110100011001011111100001011010000010101110111011010011010001100000001111111100011100010013100000101011131001
SCRI_RS_229894 3 17 00000100011001011110100011001011111100001011010000010101110111011010011010001100030001111111100011100010013100000101011131001
JHI-Hv50k-2016-158891 3 17 00000101011001011110100011011011111100001011010000010101110111011010011010001100000001111111100011100010013100000101011131001
JHI-Hv50k-2016-159041 3 17 00000101011001011110100011001011111100001011010000010101110111011010011010001100000001111111100011100010013100000101011131001
JHI-Hv50k-2016-159219 3 17 00000101011001011110100011011011111100001001010000010101110111011010011010001100000001111111100011100010013100000101011131001
JHI-Hv50k-2016-159636 3 17 00000101011001011110100011011011311100001001010000010101110111011010011010001100000001111111000011100010010100000101011101001
JHI-Hv50k-2016-159793 3 17 00000101011001011110100011011011311100001001030000010101110111001010011010001100000001111111000011100010010100000101011101001
JHI-Hv50k-2016-160053 3 17 00000101011001011110100011011011311100001001010000010101110111001010011010001100000001111111000011100010000100000101011101001
JHI-Hv50k-2016-160251 3 18 00000101011001111110100011011011311100011001010000010101110111001010011010001100000001111111000011100010000100000101011101001
JHI-Hv50k-2016-160274 3 18 00000101011000111110100011011011311100011001010000010101110111001110011010001100000001111111000011100010000100000101011101001
JHI-Hv50k-2016-160353 3 18 00000101011000111110100011011011311100011001010000010101110111001010011010001100000001111111000011100010000100000101011101001
JHI-Hv50k-2016-160470 3 18 00000100011000111110100011011011311100011001010000010101110111001110011010001100000001111111000011100010000100000101011101001
JHI-Hv50k-2016-160544 3 20 01000100011000111110100011011011310100011001010001010101110111001110011010001100000001111111000011100010000100100101011111001
BOPA2_12_30571 3 24 01000100111000111111100011011011310100011001010001010101110111001110011010001100000011111111100011100110000100100111111101011
JHI-Hv50k-2016-161122 3 27 01000100111000111111101111011011310100011001010001010101110111001110011010001110000011111111100011100101000100110101111101011
JHI-Hv50k-2016-161228 3 27 01000100111000111111101111011011310300011001010001010101110111001110011010000110000011111111100011100101000100110101111101011
SCRI_RS_230486 3 27 01000100111000111111101110011011310300011001010001010101110111001110011010000110000011111111100011100101000100110101111101011
JHI-Hv50k-2016-161480 3 28 01000100111000111111101110011011310300011001010001010101100111001110011010000110000011111011100011100101000100110101111101011
JHI-Hv50k-2016-162277 3 30 01000100111000111101101110011011310300011001010001010101100111001110011010000110000001111011100001100101000100110001111101011
JHI-Hv50k-2016-162483 3 30 01000100111000111001101110011011310300011001010001010101100111001110011010000110000001111011100001100101000100110001111101011
BOPA2_12_31298 3 30 01000100111000111001101110011011310300011001010001010001100111001110011010000110000001111011100001100101000100110001111101011
JHI-Hv50k-2016-163473 3 31 01000100111000111001101110011011310300011001010001010001100111001110010010000110000001111011100001100101000100110000111101011
JHI-Hv50k-2016-163506 3 31 01000100111000111001101110011011310300011001010001010001100111001110010010000110000001111011100011100101000100110000111101011
JHI-Hv50k-2016-163961 3 31 01000100111000111001101110011011310300011001010001010001100111001110010010000110000001111011100011101101000100110000111101011
JHI-Hv50k-2016-164106 3 31 01000100111000111001101110011011310300011011010001010001100111001110010010000110000001111011100011101101000100110000111101011
JHI-Hv50k-2016-164244 3 33 01000100111000111001101100011011310300011111010001010001100101001100010010000110000001111011100011101101000100110000111101011
JHI-Hv50k-2016-164271 3 34 01000100111000111001101100011011310300001111010001010001100101001000010010000110000001111011100011101101010100110000111101011
JHI-Hv50k-2016-164364 3 35 01000000011000111001131100011011310300001111010001010001100101001000010010000110000001111011100011101101010100110000111101011
SCRI_RS_146425 3 35 01000000011000111001131100011011110300001111010001010001100101001000010010000110000011111011100011101101010100110000111101011
BOPA1_9018-522 3 35 01000000011000111001131100011011110300001111010001010001100101001000010010000110000011111011100011101101010100010000111101011
JHI-Hv50k-2016-164401 3 35 01000000011000111001131100011011110100001111010001010001100101001000010010000110000011111011100011101001010100010000111101011
JHI-Hv50k-2016-164656 3 35 01000000011000111001131100011011110100001111010001010001100101001000010010100130000011111011100011101001010100010000111101011
JHI-Hv50k-2016-164706 3 35 01000000011000111001131100011011110100001111010001010001100101001000010010100130000011111011100111101001010100010000111101011
JHI-Hv50k-2016-164728 3 35 01000000011000101001131100011011110130001111010001010001100101001000010010100130000011111011100111101001010100010000111101011
JHI-Hv50k-2016-164734 3 35 01000000011000101001131100011111110130001111010001010001100101001000010010100130000011111011100111101001010100010000111101011
JHI-Hv50k-2016-164834 3 35 01000000011000101001131100011110110130001111010001010001100101001000010010100130000011111011100111101001010100010000111101011
JHI-Hv50k-2016-165978 3 35 01000000011000101001111100011110110130001111010001010001100101001000010010100130000011111011100111101001011100010000111101011
BOPA2_12_30467 3 35 01000000011000101011111100011110110130001111010001010001100101001000010010100130000011111011100111101001011100010000111101011
JHI-Hv50k-2016-166356 3 37 01000000011000101011111100011110110130001111010001010001100111101110010010100130000011111011100111101000011130010000111101011
JHI-Hv50k-2016-167001 3 38 01000000011000101011111100010110110110001111010001010001100111101110010010100130000011111011100101101000011130010000111101011
JHI-Hv50k-2016-167734 3 38 01000000011000101011111100010110110130001111010001010001100111100110010010100130000011111011100101101000011130010000111101011
BOPA2_12_31011 3 38 01000000011000101011111100010110110100001111010001010001100111100110010010100100000011111011100101101100011100010000111101011
JHI-Hv50k-2016-183072 3 38 01000000111000101011111100010110110130001111010001010001100111100110010010100130000011111011100101101100011130010000111101011
SCRI_RS_221644 3 39 01000000111000101011111100010110111130001111010001010001100111100110010010100100000011111011100101101100011130110000111101011
JHI-Hv50k-2016-183207 3 39 01000000111000101011111100010110111130001111000001010001100111100110010010100100000011111011100101101100011130110000111101011
JHI-Hv50k-2016-183234 3 39 01000000111000101011111100010110111130001111000001010001100111100110010010100100000011101011100101101100011130110000111101011
JHI-Hv50k-2016-184071 3 39 01000000111000101011111100010110111130001111000001010001100111100110010010100100000011101001100101101100011130110000111101011
JHI-Hv50k-2016-184214 3 39 01000000111000101011111100010110111130001111000001010001100111100110010010100100000011101001100100101100011330110000111101011
SCRI_RS_168665 3 39 01000000111000101011111100000110111130001111000001010001100111100110010010100100000011101001100100101100011330110000111101011
JHI-Hv50k-2016-185324 3 39 01000000111000101011111100000110111130001111000001010101100111100130010010100100000011101001100100101100011330110000111101011
JHI-Hv50k-2016-186446 3 39 01000001111000101011111100000110111100001111000001010101100111100110010030100100000011101001100100101100011030110000111101011
SCRI_RS_13376 3 40 01000001111000101011111100000110111100001111000001010101100111100110010030100100000011101101100100101101011030110000111101011
JHI-Hv50k-2016-187190 3 40 01000001111000101011111100000110111100001111000001010101100111110110010030100100000011101101100100101101011030110000111101011
JHI-Hv50k-2016-187232 3 40 01000001111000001011111100000110111100001111000001010101100111110110010030100100000011101101100100101101011030110000111101011
JHI-Hv50k-2016-187263 3 40 01000001111000001011111100000110111100001111000001010101100111110110010030100100000011101101100100101101011030010000111101011
JHI-Hv50k-2016-188022 3 40 01000001111000001011111100000110111100001111000001000101100111110110010030100100000011101101100100101101011030010000111101011
BOPA1_4150-398 3 41 01000001111000001011111100000110011100001111000001001101100111110110010000100100000011101101100100101101011030010000111101011
JHI-Hv50k-2016-190829 3 41 01000001111000001011111100000110011100001111000001001101100111110110010000000100000011101101300100101101011030010000111101011
SCRI_RS_189039 3 41 01000001011000001011111100000110011100001111000001001101100111110110010000000100000011101101300100101101011030010000111101011
JHI-Hv50k-2016-192311 3 42 01000001011010001011111100001110011100001111000001001101100111110110010000000100000011101101300100101101011030010000111101011
JHI-Hv50k-2016-194575 3 42 01000001011010001011111100001110011100001111000001001101100111110111010000000100000011101101300100101101011000010000111101011
JHI-Hv50k-2016-194660 3 42 01000001011010001011111100001110011100001111000101001101100111110111010000000100000011101101300100101101011000010000111101011
JHI-Hv50k-2016-194816 3 42 01000001011010001011111100001110011100001111000101011101100111110111010000000100000011101101300100101101011000010000111101011
JHI-Hv50k-2016-194904 3 42 01000001011010001011111100001110011100001111000101011101100111010111010000000100000011101101300100101101011000010000111101011
BOPA1_ABC15290-1-3-262 3 44 01000001011010001011111100001110011100001111001101011101100011010111010000000100000011101101300100101101101000010000111101010
JHI-Hv50k-2016-194941 3 44 01000001011010001111111100001110011100001111001101011101100011010111010000000100000011101101300100101101101000010000111101010
JHI-Hv50k-2016-194953 3 44 01000001011010001111111100001110011100001110001101011101100011010111010000000100000011101101300100101101101000010000111101010
SCRI_RS_155763 3 44 01000001011000001111111100001110011100001110001101011101100011010111010000000100000011101101300100101101101000010000111101010
SCRI_RS_189790 3 44 01000000011000001111111100001110011100001110001101011101100011010111010000000100000011101101300100101101101000010000111101010
JHI-Hv50k-2016-196372 3 47 01000000011000011111110100001110013100001110011101001101100011010111010000000100000011111101300100101111101000010000011101010
SCRI_RS_156111 3 48 01000000011000011111110100001110013100001110011101001101100011010111010000000100000011111111300100101111101001010000011101010
JHI-Hv50k-2016-196644 3 48 01000000011000011111110100001110013100001110011101001101100011010111010000000100000011111111300100100111001001010000011101010
JHI-Hv50k-2016-196962 3 48 01000000011000011111110100001110013100001110011101001101100011010111010000000100000011111111300100101111001001010000011101010
BOPA1_963-386 3 48 01000000011000011111110100001110013100001110011101001101100011010111010000000100000011111111300100101111001001010000011101010
JHI-Hv50k-2016-197187 3 48 01000000011000011111110100001110013100001110011100001101100011010111010000000100000011111111300100101111001001010000011101010
JHI-Hv50k-2016-197393 3 48 01000000011000011111110100001110013100001110011100001101100011010111010000000100000011111111300100101111001001010000111101010
JHI-Hv50k-2016-197534 3 49 01000000011000011111110100001110013100001110011100001101100011010111010000000100001011111111300100101111001001010000111101000
JHI-Hv50k-2016-197572 3 50 01000000011000011111110100001110013100001110011100001111100011010111010000000100001011111111300100101111001001010001111101001
SCRI_RS_206202 3 51 01000000010000011111110100001110013100001110011100001111100011010011010000000100001011111111300100101111001001010001111101001
SCRI_RS_192761 3 51 01000000010000011111110100001110013100001110011100001111100011010011010000000100001011111111300100101111001001010001111101101
JHI-Hv50k-2016-198133 3 52 01000000010000011111110100101110013100001110011100001111100011010011010000000100001011111111300100101101001001010001111101101
JHI-Hv50k-2016-198658 3 55 01000010010000011110110100101110013100001110011100301111100011010011010000000100001011111111300100101101000100000001111101101
SCRI_RS_138193 3 56 01000010000000011110110100101110013130001110011100301011100011010011010000000130001011111111300100101101000100000001111101101
JHI-Hv50k-2016-199619 3 58 01100010000000011110110100101110013130001110011100301011100010010011010000000130001011111111300100101101000100000001111101101
JHI-Hv50k-2016-200483 3 57 01000010000000011110110100101110010100001110011100001011100010010010010000000100001011111111000100101101000100000001111101101
SCRI_RS_115925 3 58 01000010000000011110110100101110013130001110011100301011100010010011010000000130001011111111100100101101000100000001111101101
SCRI_RS_3352 3 59 01000010000000011110110100101110013130001110011100301011100010000011010000000130101011111111100100101101000100000001111101001
SCRI_RS_80331 3 59 01000010001000011110110100101110013130001110011100301011100010000011010000000130101011111111100100101101000100000001111101001
JHI-Hv50k-2016-200905 3 59 01000010001000011110110100101110013130001110011100301111100010000011010000000130101011111111100100101101000100000001111101001
SCRI_RS_235238 3 60 01000010001000011110110100101110013130001110011100301111100010000011010000000130101011111111101100101101000100000001111101011
JHI-Hv50k-2016-201013 3 60 01000010001000011110110100101110013130001110011100301111100010000011010000000130101011111110101100101101000100000001111101011
JHI-Hv50k-2016-201048 3 61 01000010001000011110110100101110013110001110011100301111100010000011010010000130101001111110101100001101000100000001111101011
SCRI_RS_172266 3 61 00000010001000011110110100101110013110001110011100301111100010000011010010000130101001111110101100001101000100000001111101011
JHI-Hv50k-2016-201308 3 61 00000010001000011110110100101110013100001110011100301111100010000011010010000130101001111110101100001101000100000001111101011
JHI-Hv50k-2016-201497 3 61 00000010001000011110110100101110013100001110011100301111100010000011010011000130101001111110101100031101000100000001111101011
JHI-Hv50k-2016-201591 3 61 00000010001000011110110100101100013100001110011100301111100010000011010011000130101001111110101100031101000100000001111101011
JHI-Hv50k-2016-201898 3 62 00000010001000011110110100101100013100001110010100301111101010000011010011000130101001111110101100031101000100000001111101011
SCRI_RS_149566 3 62 00000010001000011110110100101100013100001110010100301111101010000011010011000130101001111110101100031101000100000101111101011
SCRI_RS_114333 3 62 00000010001000011110110100101100013100001110010100301111101010000011010011000130101001111110101110031101000100000101111101011
SCRI_RS_168981 3 62 00000010001000011110110100101000013100001110010100301111101010000011010011000130101001111110101110031101000100000101111101011
SCRI_RS_230069 3 62 00000010001000011110110100101000013110001110010100301111101010000011010011000130101001111110101110031101000100000101111101011
SCRI_RS_231027 3 63 00000010001000011110110100101000013110001110010100301111101010000011010001000130101001111110101110031101000100000101101101011
JHI-Hv50k-2016-202816 3 63 00000010001000011110110100100000013110001110010100301111101010000011010001000130101001111110101110031101000100000101101101011
SCRI_RS_234342 3 63 00000010001000011110110100100000013110000110010100301111101010000011010001000130101001111110101110031101000100000101101101011
SCRI_RS_236528 3 64 00000010001000011110110100100000013110000110010100301111101010000011010001000110101001111110111110031101000100000101100101011
JHI-Hv50k-2016-203893 3 66 00000010001000011010111100100000033110010110010100301111101010003011000001000110101001111110111110031101000100000101100101011
SCRI_RS_192360 3 66 00000010001000011010113100100000033110010110010100301111101010003011000001000110101001111010111110031101000100000101100101011
SCRI_RS_14857 3 66 00000010001000011010113100100000033110010110010100301111101010003011000001000110101001111010111110031100000100000101100101011
JHI-Hv50k-2016-204445 3 66 00000010001000011010113100100000033110010110010100300111101010003011000001000110101001111010111110031100000100000101100101011
BOPA1_5488-1097 3 66 00000010001000011010113100100001033110010110010100300111101010003011000001000110101001111010111110031100000100000101100101011
JHI-Hv50k-2016-204811 3 66 10000010001000011010113100100001030110010110010100300111101010003011000001000110101001111010111110031100000100000101100101011
JHI-Hv50k-2016-204890 3 66 10000010001000011010113100100001030110010110011100300111101010003011000001000110101001111010111110031100000100000101100101011
SCRI_RS_194623 3 68 10000010001000011010113100100001130110010110111100000111101010000011000001000110101001111010111110031100000100000101100101101
JHI-Hv50k-2016-205259 3 68 10000010001000011010113100100001130110010110111100000111101010000011000001000110101001111010111110031100000100000001100101101
BOPA2_12_31238 3 68 10000010001000011010113100100001130110010110111100000111101010100011000001000110101001111010111110031100000100000001100101101
BOPA2_12_20413 3 68 10000010001000011010113100100001130110010110111100000111101010100011001001000110101001111010111110031100000100000001100101101
BOPA2_12_30081 3 69 10100010001000001010113100100001130110010110111100001111101010100011001001000110101001111010111110031100000100000001100101101
JHI-Hv50k-2016-206415 3 69 10100010001100001010113100100001130110010110111100001111101010100011001001000110101001111010111110011100000100000001100101101
BOPA2_12_20369 3 69 10100010001100001010113100100001130110010110111100001111101010100011001001000110101001111110111110011100000100000001100101101
JHI-Hv50k-2016-206595 3 69 10100010001000001010113100100001130110010110111100001111101010100011001001000110101001111110111110011100000100000001100101101
JHI-Hv50k-2016-206600 3 70 10100010001000001010113100100001130100010110111100000111101010100011001001000110101001111110111110011100000100000001100101101
SCRI_RS_146012 3 70 10100010001000001010113100100001130100010110111100000111101010100011001001000110101001101110111110011100000100000001100101101
JHI-Hv50k-2016-206781 3 70 10100010001000001010113100100001130100010110111100000111101010100011001001000110101001101100111110011100000100000001100101101
JHI-Hv50k-2016-206829 3 70 10100010001000001010113100100001130100010110111100000111101010100011011001000110101001101100111110011100000100000001100101101
BOPA2_12_30973 3 70 10100010001000001010113100100001130100010110011100000111101010100011011001000110101001101100111110011100000100000001100101101
JHI-Hv50k-2016-207327 3 70 10100010001000001010113100100001130100010110011100000111101010100011011001001110101001101100111110011100000100000001100101101
JHI-Hv50k-2016-207601 3 71 10100010001000001010113100100001130100010110011100000101101010100011011000001110101001101100111110011100000100000001100101101
JHI-Hv50k-2016-207875 3 71 10100010001000001010113100100001130100010110011100000101101010000011011000001110101001101100113110011100000100000001100101101
JHI-Hv50k-2016-208029 3 71 10100010001000001010113100100001130100010110011100000100101010000011011000001110101001101100113110011100000100000001100101101
SCRI_RS_209963 3 71 10100010001000001010110100100001110100010110011100000100101010000011011000001110101001101100113100011100000100000301100101101
JHI-Hv50k-2016-208711 3 72 10100010001000001010111100100001110100010110011100100100101010000011011000001110101001101100110100011100000100000101100101101
JHI-Hv50k-2016-209285 3 72 10100010001000001010111100100001110100010110011100100100101010000011011000001110101001101100110100011101000100000101100101101
BOPA2_12_31251 3 72 10100010001000001010111100100001110100010110011100100100101010000011011000001110101001101100110100011101000101000101100101101
SCRI_RS_10016 3 72 10100010001000001010111101100001110100010110011100100100101010000011011000001110101001101100110100011101000101000101100101101
SCRI_RS_24545 3 72 10100010001000001010111101100001110110010110011100100100101010000011011000001110101001101100110100011101000101000101100101101
JHI-Hv50k-2016-211367 3 73 10100010001000001010111101100001110111010110011100100100101010000011011000001110001001101100110100011001000101000101100101101
SCRI_RS_231382 3 74 10100000001000001010111101100001110111010110011100101100101010000011011000001110001001101100110100011001000101000101100101101
JHI-Hv50k-2016-212026 3 74 10100000001000001010111101100001110111010110011100101100101010000011011000001110001001101100110100011000000101000101100101101
SCRI_RS_175682 3 74 10100000001000001010110101100001110111010110011100101100101010000011011000001110001001101100110100011000000101000101100101101
JHI-Hv50k-2016-212404 660,933,291 3 74 10100000001000001010110001100001110111010110011100101100101010000011011000001110001001101100110100011000000101000101100101101
SCRI_RS_209285 3 74 10100000001000001010110001100001110111010110011101101100101010000011011000001110001001101100110100031000000101000101100101101
JHI-Hv50k-2016-212629 3 74 10100000001000001010110001100001110111010110011101101100101010000011011000000110001001101100110100031000000101000101100101101
SCRI_RS_183550 3 74 10100000001000001010110001100001110111010110011101101100101010000011011000000110001001101100110100031000000101000101100101111
SCRI_RS_174582 3 74 10100000001000001010100001100001110111010110011101101100101010000011011000000110001001101100110100031000000101000101100101111
SCRI_RS_175220 3 75 10100000000000001010100001100001110111010110011101101100101010000011011000000110000001101100110100031000000101000101100101111
SCRI_RS_169325 3 75 10100000000000001010100001100001110111010110010101101100101010000011011000000110000001101100110100031000000101000101100101111
SCRI_RS_167698 3 75 10100000000000001010100001100001110111010110010101101100101010010011011000000110000001101100110100031000000101000101100101111
SCRI_RS_168977 3 76 10100000000000001010100001100001110111010110010101101100101110010011011000000110000001101100110100001000010101000101100101111
BOPA1_5520-925 3 76 10100000000000001010100001100001110111010110010101101100101110010011011000000110000001101100110100001000010101000111100101111
SCRI_RS_165044 3 76 10100000000000001010100001100001110111010110010101101100101010010011011000000110000001101100110100001000010101000111100101111
SCRI_RS_189186 3 76 10100000000000001010100001100001110111010110010101101100111010010011011000000110000001101100110100001000010101000111100101111
JHI-Hv50k-2016-215289 3 76 10100000000000001010100001100011110111010110010101101100111010010011011000000110000001101100110100001000010101000111100101111
SCRI_RS_189710 3 76 10100001000000001010100001100011110111010110010101101100111010010011011000000110000001101100110100001000010101000111100101111
JHI-Hv50k-2016-215413 3 76 10100001000000001010100001100011110111010110010101101100111010010011011000000110000001101100110110001000010101000111100101111
SCRI_RS_10019 3 77 10100001003000101010100001100011110111010110010101101100111010010011011000000110000001101100110111001000000101000111100101111
JHI-Hv50k-2016-216183 3 77 10100001003000101010100001100011110111010110010101101100111010110011011000000110000001101100110111001000000101000111100101111
SCRI_RS_208722 3 78 10100001003000101010100001100011110111010100010101101100111010110011011000000110000001001100110111001000000101000111100101111
SCRI_RS_110995 3 78 10100001003000101010100001000011110111010100010101101100111010110011011000000110000001001100110111001000000101000111100101111
SCRI_RS_204321 3 78 10100001003000101010100001000011110111010100010101101100111011110011011000000110000001001100110111001000000101000111100101111
SCRI_RS_65010 3 78 10100001003000101010100001000011110111010100010101101100111011010011011000000110000001001100110111001000000101000111100101111
JHI-Hv50k-2016-218766 3 78 10100001003000101010100001000011110111010100010101101100111011030011011000000110000001001100110111001000000101000111100101101
JHI-Hv50k-2016-218879 3 78 10100001003000101010100001000011110111010100010101101100111011030111011000000110000001001100110111001000000101000111100101101
JHI-Hv50k-2016-219059 3 78 10100001001000101010100001000011110111010100010101101100111011030111011100000110000001001100110111001000000101000111100101101
SCRI_RS_230023 3 78 10100001001000101010100001000011110111010100010101101100111011030111011100000110000001001100110111001000000101000111000101101
SCRI_RS_118833 3 78 10100001001000101010100001000011100111010100010101101100111011030111011100000110000001001100110111001000000101000111000101101
SCRI_RS_229623 3 79 10100001001000101010100001000011100111010100000101101100111011030111011100000010000001001100110101001000000101000111000101101
BOPA1_3682-556 3 81 10100001000000101010100001000011100111010100000101101100111011030110011100000000000001001100110001001000000101000111000101101
SCRI_RS_49693 3 81 10100001000000101010100101000011100111010100000101101100111011330110011100000000000001001100110001001000000101000111000101101
BOPA1_7169-713 3 81 10100001000000101010100101000011100111011100000101101100111011330110011100000000000001001100110001001000000101000111000101101
SCRI_RS_127719 3 81 10100001000000101010100101003011100111011100000101101100111011330110011100000000000001001100110001001000000101000111000101100
SCRI_RS_156315 3 81 10100001000000101010100101003011100111011100000101101100111011331110011100000000000001001100110001001000000101000111000101100
JHI-Hv50k-2016-221774 3 81 10100001000000101010100101003011100111011100000101001100111011331110011100000000000001001100110001001000000101000111000101100
SCRI_RS_739 3 82 10100001000000101010100101003011100111011100000111001100111011331110011100000000000001001100110001000000000101000111100101100
SCRI_RS_204353 3 82 10100001000000101010100101003011100111011100000111001100111011331110011100000000000000001100110001000000000101000111100101100
SCRI_RS_202154 3 82 10100001000000101010100101003011100111011100000111001100111011331110011100000000000000001100110001000000100101000111100101100
BOPA1_13494-110 3 83 10100001000000101010100101003011100111011100000111001000111011301110010100000000000000001100110001000000100101000111100101100
JHI-Hv50k-2016-224463 3 83 10100001000000101010100101003011100111011100000111001000111011301110010100000000000000001100110001000000100101000111100100100
JHI-Hv50k-2016-224742 3 83 10100001000000101010100101003011100111011100000111001000131011301110010100000000000000001100110001000000100101000111100100000
SCRI_RS_13426 3 83 10100001000000101010100101003011100111011100000111001000131011301110010100000000000000001100110001000000000101000111100100000
SCRI_RS_162720 3 83 10100001000000101010100101003011100111011100000111001000131011301110010100000000000000001100111001000000000101000111100100000
JHI-Hv50k-2016-225595 3 83 10100001000000101010100101000011100111011100000111001000131011300110010100000000000000001100111001000000000101000111100100000
JHI-Hv50k-2016-225645 4 0 01101001011011010300001003111101001011001000010100101000000110001310111110000111110111011011100000100101100100001100010111031
JHI-Hv50k-2016-227291 4 0 01101011011011010300001003111101001011001000010100101000000110001310111110000111110111011011100000100101100100001100010111031
JHI-Hv50k-2016-227429 4 0 01101011011011010300001003111101001011001000010100101000000110001310111110000111110110011011100000100101100100001100010111011
JHI-Hv50k-2016-227574 4 0 01101011011011010300001003111101001011001000010100101000000110001310111110000111110110011011000000100101100100001100010111011
JHI-Hv50k-2016-227542 4 1 01101011011011010300011003111101001011001000010100101000001110001310111110000111110110011011000100100101100100001100000111011
JHI-Hv50k-2016-227612 4 1 01101011011011010300011003111101001011001000010100101000001110001310111110000111110110011011000100100101100100001100000111011
JHI-Hv50k-2016-227629 4 1 01101011011011010300011003111101001011001000010100101000001110001310111110000111110110011011000000100101100100001100000111011
JHI-Hv50k-2016-227690 4 1 01101011011011010300011003111101001011001000010100101000001110001310111110000111110110011011000000100101100100001100010111011
JHI-Hv50k-2016-227904 4 1 01101011011011010300011003111101001011001000110100101000001110001310111110000111110110011011000100100101100100001100000111011
JHI-Hv50k-2016-228070 4 1 01101011011011010300011003111101001011001000010100101000001110001310111110000131110110011010000100100101100100001100000111011
JHI-Hv50k-2016-228126 4 1 01101011011011010300011003111101001011001000010100101000001110001310111110000131111110011010000100100101100100001100000111011
JHI-Hv50k-2016-228187 4 1 01101011011011010300011000111101001011001000010100101000001111001310111110000131111110011010000100100101100100001100000111011
JHI-Hv50k-2016-228358 4 3 01101011011010010100011000110101001011001000010100101000001111001110111110000131111100011010000100110111100100001100000111031
JHI-Hv50k-2016-228383 4 3 01101011011010010100011000110101001011001000010100101000001111001110111110000131111110011010000100110111100100001100000111031
JHI-Hv50k-2016-228551 4 5 01101011010010010100011000110101001011001000010100101000011111001110111110010131111100011010000100110111100100001110000111031
JHI-Hv50k-2016-228641 4 6 01101011010010010000011000110101001011001000010100100000011111001110111110010031111100011010000100110111100100001110000111031
JHI-Hv50k-2016-228915 4 6 31101011010010010000011000110101001011001000010000100000011111001110111110010031111100011010000100110111100100001110000111031
JHI-Hv50k-2016-228998 4 7 31101011010010010000011000110101001011001000010000100000010111001110111100010031011100011010000100110111100100001110000111031
JHI-Hv50k-2016-229333 4 9 30100001010010010000011000113101001011001000110000100000010111001110111100010031011100011010000100110111100110001110000111031
JHI-Hv50k-2016-229429 4 7 30101011010010010000011000113101001011001000010000100000010111001110111100010031011100011010000100110111100100001110000111031
JHI-Hv50k-2016-229452 4 10 30100001010010010000011000113101001011001000110000100000010111001110111101010031011100011010000100110011100111001110000111031
JHI-Hv50k-2016-229838 4 11 30100001010010010000031000113101001011001000110000100000010011001110011101010031011100011010000100110011100111001100000111030
JHI-Hv50k-2016-230011 4 11 30100001010010010000011000113101001011001000110000100000010011001110011101010031011100011010000100110011100111001110000111030
JHI-Hv50k-2016-230216 4 11 30100001010010010000031000113101001011011000110000100000010011001110011101010031011100011010000100110011100111001100000111030
JHI-Hv50k-2016-230271 4 11 30100001010010010000031000113101001011011000110000100000010011001110011101010031011100011010000100010011100111001100000111030
JHI-Hv50k-2016-230367 4 12 30100001010010010000001000113101001011011010110000000000010011001110011101010031011100011010000100010011100111001100000111030
JHI-Hv50k-2016-230503 4 13 30100001010010010000001000113101001011011010110000000000010011001110011101010031011100011010000100010111100111001000000111030
JHI-Hv50k-2016-230574 4 14 30100001010010010000001000110101001001011010110010000000010011001110011101010031011100010010000100010111100111001000000111030
JHI-Hv50k-2016-230622 4 14 30100001010010010000001000110101001001011010110010010000010011001110011101010031011100010010000100010111100111001000000111030
SCRI_RS_58772 4 15 30100001010110011000001000110101001000011010110010010000010011001110011101010031011100010010000100010111100111001000000111030
BOPA1_1593-1597 4 15 30100001010110111000001000110101001000011010110010010000010011001110011101010031011100010010000100010111100111001000000111030
JHI-Hv50k-2016-230847 4 16 00100001010110111001001000110100001000011010110010010000010011001110011101010001011100010010000100010111100111001000000111001
JHI-Hv50k-2016-230910 4 16 30100001010110111001001000110100001000011010110011010000010011001110011101010031011100010010000100010111100111001000000111031
JHI-Hv50k-2016-230927 4 16 30100001010110111001001000110100001000011010110011010000010011001110011101010031010100010010000100010111100111001000000111031
JHI-Hv50k-2016-230936 4 17 30100001010110111001001000110100000000011010110011010000010011001110011101010031010100010010000100010111100110001000000111031
JHI-Hv50k-2016-231118 4 17 30100001010130011001001000110100000000011010110011010000010011001110011101010031030100010010000100010111100110001000000111031
JHI-Hv50k-2016-231218 4 17 30100001010130111001001000110100000000011010110011010000010011001110011101010011030100010010000100010111100110001000000111031
JHI-Hv50k-2016-231258 4 17 30100001010130111001001000110100000000011010110011010000010011001110011101010011000000010010000100010111100110001000000111031
JHI-Hv50k-2016-231349 4 17 10100001010130111001000000110100000000011010110011010000010011001110011101010011000000010010000100010111100110001000000111031
JHI-Hv50k-2016-231549 4 18 10000001010130111011000000110100000000011010110011010000010011001110011101010011000000011010000100010111100110001000000111031
JHI-Hv50k-2016-231723 4 18 10000001010130111011000000110100000000011010110011010000010011001110011101000011000000011010000100010111100110001000000111031
JHI-Hv50k-2016-231850 4 20 10100001010131111011000000110100000000011010110011010000010011001110031101000011000000011010000100010010100110001000000111001
JHI-Hv50k-2016-231888 4 21 10100001010131011011000000110100000000011010110011010000010011001110031101000001000000011010000100010010100110001000000111001
JHI-Hv50k-2016-232225 4 23 10100001010131011011000000110100000000011010130011010000010011001010001101000000000000111011000100010010100110001000000111000
JHI-Hv50k-2016-232253 4 23 10100001010131011011000000110100000000011010130011010000110011001010001101000000000000111011000100010010100110001000000111000
JHI-Hv50k-2016-232276 4 23 10100001010131011011000000110100000000011010130011010000110011001010001101000000000001111011000100010010100110001000000111000
JHI-Hv50k-2016-232586 4 23 10100001010131011011000000110100000000011010130011010000110011001010001101000000000001101011000100010010100110001000000111000
JHI-Hv50k-2016-232815 4 25 10100001010131011011000000100100000000011000130011010000110010011010001101000000000001101011000100010010100110000000000111000
JHI-Hv50k-2016-232929 4 26 10100001310131013111000000100100000000011000100011010000110010011010101101000000000001101011000100010010100110000000000111000
JHI-Hv50k-2016-233000 4 27 10100001310131013111000000000100000000011001100011310000110010011010101101000000000001101011000100010010100110000000000011000
JHI-Hv50k-2016-234067 4 28 10100001310131013111000000000100000000011001100011310000110000011000101101000000000001101011000100010000100110000000000011000
JHI-Hv50k-2016-234295 4 29 10100101310101013111000000000100000000011001100011310000110000010000101101000000000001101011000100010000100110000000000011000
JHI-Hv50k-2016-234313 4 29 10100101310101013111000000000100000000011001100011310000110000010000101101000000000000101011000100010000100110000000000011000
JHI-Hv50k-2016-234402 4 29 10100101310101013111000000000100000000011001100011310000110000110000101101000000000000101011000100010000100110000000000011000
JHI-Hv50k-2016-234653 4 30 10100101010101013111000000000100000000011101100011310010110000110000101101003000000000101011000100010000100110000000000011000
JHI-Hv50k-2016-235164 4 30 10100101010101013111000000001100000000011101100011310010110000110000101101003000000000101011000100010000100110000000000011000
JHI-Hv50k-2016-235577 4 30 10000101010101013111000000001100000000011101100011310010110000110000101101001000000000101011000100010000100110000000000011000
JHI-Hv50k-2016-235660 4 30 10000101010101013111000000001100000000011101100011310010110010110030101101001000000000101011000100010000100110000000000011000
JHI-Hv50k-2016-236070 4 30 10000101010101013111000000001110000000011101100011310010110010110030101101001000000000101011000100010000100110000000000011000
SCRI_RS_237021 4 30 10000101010101013110000000001110000000011101100011310010110010110000101101031000000000101011000100010000100110000000000011000
JHI-Hv50k-2016-245610 4 31 10010101010100013110000000000110000000011101100011310010110010110000101101031000000000101011000100010000100110000000000011000
JHI-Hv50k-2016-246341 4 31 10010101010100013110000000000110000000011101100011310010110010110000101101031000000000101011000100010001100110000000000011000
JHI-Hv50k-2016-250436 4 32 10010101010100013110000000000111000000011101000011310010110010110000101100011000000000101011000100010001100110000030000011000
JHI-Hv50k-2016-251099 4 32 10010101010100013110000000000111000000011101000011310010110010110000101100011000000000101011000100010001000110000030000011000
JHI-Hv50k-2016-251207 4 32 10010101010100013110000000000111000100011101000011310010110010110000101100011000000000101011000100010001000110000030000011000
JHI-Hv50k-2016-251563 4 32 10010101010000013110000000000111000100011101000011310010110010110000101100011000000000101011000100010001000110000030000011000
JHI-Hv50k-2016-251961 4 32 10010101010000003110000000000111000100011101000011310010110010110000101100011000000000101011000100010001000110000030000011000
JHI-Hv50k-2016-252555 4 33 10010101010000003110000000000111000100011101000011300010110010110000101100011000000000101011000100010001000110010030000011000
JHI-Hv50k-2016-253553 4 33 10010101010000003110000000001111000100011101000011300010110010110000101100011000003000101011000100010001000110010030000011000
SCRI_RS_218193 4 33 10010101010000003110000000001111000100011101000011300010110010110000101100011000003000101011000100010001000110010030100011000
JHI-Hv50k-2016-254477 4 34 10010101010000003113000000001111000100011101000010300010110010110000101000011000003000101011100100010001000110010030100011000
JHI-Hv50k-2016-255186 4 34 10010101010000003113000000101111000100011101000010000010110010110000101000011000003000101011100100010001000110010030100011000
JHI-Hv50k-2016-256451 4 34 10010101010000013110000000101111000100011101000010000010110010110000101000011000003000101011100100010001000110010030100011000
JHI-Hv50k-2016-256939 4 35 10010101010000013110000000101111000100011111000010000010110010110000001000011001003000101011100100010001000110010030100011000
JHI-Hv50k-2016-257096 4 35 10010101010000010110000000101111000100011111000010000010110010110000001000011001100000101011100100010001000110010000100011000
JHI-Hv50k-2016-257323 4 35 10010101010000013010000000101111000100011111300010000010110010110000001000011001103000101011100100010001000110010030100011000
JHI-Hv50k-2016-257417 4 37 10010101010000011010000000101111000110011111300010000000110010110000001000011001103000101010100110010001000110010010100011000
JHI-Hv50k-2016-257666 4 37 10010101010000011010000000101111000110011111300010000000110010110100001000011001103000101010100110010001000110010010100011000
JHI-Hv50k-2016-257938 4 37 10010101010000011010000000101111000110011111300010000000110010110100001000010001103000101010100110010001000110010010100011000
JHI-Hv50k-2016-258168 4 37 10110101010000011010000000101111000110011111300010000000110010110100001000010001101000101010100110010001000110010010100011000
JHI-Hv50k-2016-258458 4 38 10110101010000011010000000101111000010011111000010000000110010110100001000010001101000101010100110010011000110010010100011000
JHI-Hv50k-2016-258493 4 38 10110101010000011010000000101111000010011111300010000000110010110100001000010001101000100010100110010011000110010010100011000
SCRI_RS_171874 4 38 10110101010000011010000000101111000011011111300010000000110010110100001000010001101000100010100110010011000110010010100011000
SCRI_RS_179438 4 39 10110101010000011010000000001111000011001111300010000000110010110100001000010001101000100010100110010011000110010010100011000
SCRI_RS_155536 4 39 10110101010000011010000000001111010011001111300010000000110010110100001000010001101000100010100110010011000110010010100011000
JHI-Hv50k-2016-259161 4 41 10110101010000100110000000001111010011001111300010000000110010110130001000010001101000100010100110010011000110310010100011000
SCRI_RS_200957 4 42 10110101010000100110000000001111010011001111300010000000110010110130001000011001101000100010100110010011000110010010101011001
BOPA1_ConsensusGBS0461-3 4 42 10110101010000100110000000001111010011001111300010000000110010110130001000011001101000100110100110010011000110010010101011001
SCRI_RS_165623 4 43 10110101010000100110000000001111011011001111300010000000110010110130001000011011101000000110100110010011000110010010101011001
SCRI_RS_149449 4 43 10110101010000103110000000001111011011001111300010000000110010110130001000011011101000000010100110010011000110010010101011001
JHI-Hv50k-2016-259968 4 43 10110101010000103110000000001111011011001111300010001000110010110130001000011011101000000010100110010011000110010010101011001
SCRI_RS_238618 4 43 10110101010000103110000000000111011011001111300010001000110010110130001000011011101000000010100110010011000110010010101011001
SCRI_RS_125524 4 43 10110101010000103110000000000111011011001111300010001000110010110130001000011011101000000010100110010011000110010000101011001
SCRI_RS_134956 4 43 10110101010000100113000000000111011031001111000010001000110010110100001000011011101000000010100110010031000110000000101011001
JHI-Hv50k-2016-261147 4 43 10110101010000103113000000000011011031001111300010001000110010110130001000031011101000000010100110010011000110000000101011001
JHI-Hv50k-2016-261149 4 44 10110101010000103113100000000011011031001111300010001000110010110130001000031011101001000010100110010011000110000000101011001
BOPA2_12_31523 4 45 10110101010000103113100000000011011031000110300010001000110010110100001000031011101001000010100110010011000110000000101011001
SCRI_RS_152166 4 46 10110101010000103113100000000011011031000110300010001000110000110100001000031011101000000010100110010011000110000000101011001
JHI-Hv50k-2016-261820 4 46 10110101010000103110100000000011011031000110300010001000110000110100001000031011101000000010100110010011100110000000101011001
SCRI_RS_229409 4 47 10110101010000103110100000000001011030001110300010001000110000110100001000031011101000000010100110010011100110000000101011001
JHI-Hv50k-2016-262430 4 47 10110101010000103110100000000001011010001110300010001000110000110100101000001011101000000010100110010011100110000000101011001
JHI-Hv50k-2016-262458 4 47 10110101010000103110100000000001011010001110300010001000110000110100101000001011001000000010100110010011100110000000101011001
SCRI_RS_230980 4 47 10110101010000103110100000010001011010001110300010001000110000110100101000001011001000000010100110010011100110000000101011001
JHI-Hv50k-2016-262688 4 48 10110131010000113110100000011001011010001110300010001000110000110100101000001011001000000010100110010011100110000000101011001
SCRI_RS_141214 4 48 10110100010000113110100000011001011010001110300010001000110000110100101000001011001000000010100110010011100110000000101011001
JHI-Hv50k-2016-262767 4 48 10110100010000113110100000011001011010000110300010001000110000110100101000001011001000000010100110010011100110000000101011001
JHI-Hv50k-2016-262842 4 48 10110100010000113110100000011001011010000110300010001000110000110300101000001011001000000000100110010011100110000000101011001
JHI-Hv50k-2016-262864 4 48 10110100010000113110100000011001011010000110300010001000110000110300101000001011001000000000000110010011100110000000101011001
SCRI_RS_188944 4 48 10110100010000113110100000011001011010000110300010001000110000110300101000001011001000000000000110010011100110000000101111001
JHI-Hv50k-2016-263017 4 49 10110100010000113110100000011001011010000110300010001000110000110300101000001111001000000100000110010011100010000000101111001
SCRI_RS_168399 4 50 10110100010000113110100000011001011010000110300010001000100000110300101000001111001000000100000110010011100010000000111111001
JHI-Hv50k-2016-263142 4 50 10110100010000113113100000011001011010000110300011001000100000110300101000001111001000000100000110010011100010000000111111001
JHI-Hv50k-2016-263180 4 51 10110100010000113113100000011001011010000110300011001000100001110300101000011111001000000100000110110011100010000000111111001
JHI-Hv50k-2016-263232 4 51 10110101010000113111100000011001011010000110300011001000100001110300101000011111301000000100000110110011100010000000111111001
JHI-Hv50k-2016-263500 4 52 10110101010000113111100000011001011010000110300111001000100001110300101000011111301000000100000110110011100010000000111110001
JHI-Hv50k-2016-263698 4 54 10110101010000113111100000011001011010100110300111001000100001111300101000011111301000000100000110110011100010000000111100101
JHI-Hv50k-2016-263578 4 55 10110101010000113111100000031001011010100110300011001000100001111300101000011111301000000100010110110011100010000000111100101
JHI-Hv50k-2016-263748 4 55 10110101010000110111110000031001011010100110300011001000100001111100101000011111301000000100010110110011100010000000111100101
JHI-Hv50k-2016-263848 4 56 10110101010001110111110000031001011010100110300011000000100001111100101000011111301000000100010110110011100010000000111100101
JHI-Hv50k-2016-263880 4 56 10110101010001110111110000031001011010100110300011000000100001111100101000011111301000000100010110110010100010000000111100101
JHI-Hv50k-2016-263956 4 57 10110101010001110101110000031001011010100110300011000000100001111000101000011111301000000100010110110010100010000000111100101
SCRI_RS_205975 4 57 10110101010001110101110000031001011010100110300011000000100001111000101000011111301000000100010110110010100010000001111100101
SCRI_RS_226787 4 58 00110101010001110101010000031001011010100110301011000000100001111000101000011111301000000100010110110010100010000001111100101
JHI-Hv50k-2016-265269 4 58 00110101010001110101010000031001011010100111301011000000100001111000101000011111301000000100010110110010100010000001111100101
JHI-Hv50k-2016-265513 4 58 00110101010001110101010000031001011010100111300011000000100001111000101000011111301000000100010110110010100010000001111100101
SCRI_RS_228030 4 58 00110101010001110101010000031001011010100111300011000000100001111000101000011111301000000100010110110010100010100001111100101
SCRI_RS_168591 4 59 00110101010001110101010000131000011010100111300011000000100001111000101000011111301000100100010110110010100010100001111100101
SCRI_RS_188827 4 60 00110101010001110101010000131000011010100111300011000001100001111000101010011111301000100100010110110010100010100001111100101
JHI-Hv50k-2016-265983 4 60 00110101010001110101010000131000011010100101300011000001100001111000101010011111301000100100010110110010100010100001111100101
JHI-Hv50k-2016-266331 4 61 00111101010001110111010000111000011010100101300011000001100001111000101010011111301000100100010110110010100010100001111100101
BOPA2_12_30987 4 61 30111101010001110111010000111000011010100101330011000001100001111000101010011111301000100100011110110010100010100001111100101
SCRI_RS_167808 4 63 30111101010001110111010000111000111010110101330011000001100001111000101010011011301000100100011110100010100010100001111100101
SCRI_RS_16715 4 63 30111101010001110111010000111000111010110101330011000000100001111000101010011011301000100100011110100010100010100001111100101
JHI-Hv50k-2016-267154 4 64 10111101000001110111010000111100111010110101110011000000100001111000101010011011301000100100011110100010100010100001111100101
SCRI_RS_9549 4 64 30111101000001110111010000111300111010110001330011000000100001111000101010011011301000100100011110100010100010100001111100101
JHI-Hv50k-2016-267605 4 64 30111101000001110111010000111300111010110001030011000000100001111000111010011011301000100100011110100010100010100001111100101
SCRI_RS_192689 4 64 30111101000001110111010000111300111010110001030011000000100001111000111010011001301000100100011110100010100010100001111100101
JHI-Hv50k-2016-268491 4 65 30111101000001110111010000111300111010110001030011000000100011111010111010011001301000100100011110100010100010100001111100101
SCRI_RS_76975 4 70 10111101000001110111010010111300101010100001010110000000100011111010111011011001100000101100010110100010110000100001111100101
SCRI_RS_196076 4 70 10110101000001110111010010111300101010100001010110000000100011111010111011011001100000101100010110100010110000100001111100101
JHI-Hv50k-2016-269261 4 70 10110101000001110111010010111300101010100001010110000000100011111010111011011001100000101100010110100010110000101001111100101
BOPA1_6019-296 4 70 10110101000001110111010010111300101010100001010110100000100011111010111011011001100000101100010110100010110000101001111100101
SCRI_RS_107762 4 70 10110101000001110111010010111300101010100001010110100000100011101010111011011001100000101100010110100010110000101001111100101
JHI-Hv50k-2016-271541 4 74 10110101000001110011000010111300001110100000010110100100000011101010111011011011100000101100010010100010110000101001111100001
JHI-Hv50k-2016-272241 4 75 10110101000001110011000010111300001110100000110110100100000011101010111011011011100000101100010010101010110000101001111100001
SCRI_RS_222098 4 77 10110101000001111011000010111300001110100000110110100100000011101010111111011011110100100100010010101010110000101001111100001
SCRI_RS_99798 4 77 10110101000001111011000010111300001110100000110110100100000011101010111111011011110100100100010010101010110000101000111100001
SCRI_RS_221876 4 78 11110101000001111011000010111300001110100000110110100100000011101010111111011011110100100100010010111010110000101000111100001
SCRI_RS_142177 4 79 11110101000001111011000010111100001110100000110110101100000011101010111111011011110101100100010011111010110000101000111100001
SCRI_RS_119390 4 79 11110101000001111011000010111100001110000000110110101100000011101010111111011011110101100100010011111010110000101000111100001
JHI-Hv50k-2016-275541 4 80 11110101000001111011000010111100001011001000110110101100000011101010111111011011110101100100010011111010110000101000111100001
SCRI_RS_189599 4 80 11110101000001111011000010111100001011001000110110101100000011101010111111111011110101100100010011111010110000101000111100001
SCRI_RS_165088 4 80 11110101000001111011000010111100001011001000110110101100000011101010111111111011110101100100010011111010010000101000111100001
SCRI_RS_137053 5 0 01110000011100111001001110103100010110101011101111110110110310011010010001111011101000011110100010111001010100010101000001010
JHI-Hv50k-2016-277334 5 0 01110000011100111001001110100100010110101011101111110110100310011010010001111011101000011110100010111001010100010101000001010
SCRI_RS_179411 5 1 01110000011100111001001110103100010110101011101111110110100310011010010001111011101000111110100010111001010100010001000011010
SCRI_RS_133909 5 1 01110000011100111001001110103100010110101011101111110110100310011010010001111011101000111110101010111001010100010001000011010
JHI-Hv50k-2016-277771 5 1 01110000011100111001001110100100010110101011101101110110100310011010010001111011101000111110101010111001010100010001000011010
SCRI_RS_31797 5 1 01110000011100111001001110103110010110101011101101110110100310011010010001111011101000111110101010111001010130010001000011010
SCRI_RS_168359 5 2 01110000011100111001001010103110010110101011101101110110100310011010011001111011101000111110101010111001010130010001000011010
SCRI_RS_236640 5 2 01110000011100111001011010103110010110101011101101110110100310011010011001111011101000111110101010111001310130010001000011010
JHI-Hv50k-2016-278357 5 2 11110000011100111001011010101110010110101011101101110110100310011010011001111011101000111110101010111001310130010001000011010
JHI-Hv50k-2016-278437 5 3 11110000011100111001011010100110010110101011101100110110100310011310011001111011101000111110111010111001310130010011000011010
JHI-Hv50k-2016-278438 5 3 11110000011100111001011010100110010110101011101100110110100310011310011001111011101000111110111010111001310130010001000011010
JHI-Hv50k-2016-278463 5 3 11110000011100111001011010101110010110101011101100110110100310011310011001111011101000111110111010111001310130010001000011010
JHI-Hv50k-2016-278520 5 3 11110000011100111001011010100110010110101011101100110110100310011310011001111011101000111110113010111001310100010001000011010
JHI-Hv50k-2016-278561 5 4 11110000011100111000011010100110010100101011101100110110100310011310011001111011101000111110113010111001310100010001000011010
JHI-Hv50k-2016-278708 5 5 11110000111100111000011010100110010100101011100100110110100310011310011001111011101000111110113010111001310103010001030011010
JHI-Hv50k-2016-278777 5 5 11110000111100111000011010100110010100101011100100110110100310011310011001111011101000111010113010111001310103010001030011010
SCRI_RS_181570 5 6 11110000111100111000011011100110010100101011100100110110100110011310011001111011101000111010113010111001310103000001030011010
JHI-Hv50k-2016-279014 5 6 11110000111100111000011011100110010100101011100100110110100110011310011001111011101000111010110011111001310103000001030011010
SCRI_RS_214760 5 6 11110000111100101000011011100110010100101011100100110110100110011310011001111011101000111010110011111001310103000001030011010
JHI-Hv50k-2016-279129 5 8 11110000111100101001011011100110011100101011100100110110100110011310011001111011101000111010110011111001310113001001030011010
BOPA1_10207-1024 5 9 11110000111100101001011011100111011100101011100110110110100110011110011001111011101000111010110011111001310113001001030011010
JHI-Hv50k-2016-279230 5 9 11110000111100101001011011100111011100101011100110010110100110011110011001111011101000111010110011111001010110001001000011010
JHI-Hv50k-2016-279246 5 9 11110000111100101001011011100111011100101011100110010110100010011110011001111011101000111010110011111001310113001001030011010
JHI-Hv50k-2016-279306 5 10 11110000111100101001011011100111011100101011100110010110100010011110011001011011101000111010110011111001010113101001000011010
JHI-Hv50k-2016-279677 5 11 11110000111100101001011011100111011100101011100110010110110010001110011001011011101000111010110011111001310113101000030011010
JHI-Hv50k-2016-280168 5 11 11110000111100101001011011100111011100101011100110010110110010001110011001011011101000111010110011101001110110101000000011010
JHI-Hv50k-2016-280756 5 11 11110000111100101001011011100011013100101011100110010110110010001110011001011011101000111010110011101001110113101000030011010
JHI-Hv50k-2016-280900 5 13 11110010111100101001011010100011003100101011100111010110110010001110011001011011101000111010110011101001110113101000030011010
BOPA2_12_30167 5 14 11110010111100101001011010100010003100101011100111010110110010001010011001011011101000111010110011101001110110101000030011010
SCRI_RS_157444 5 15 11110000111000101001011010100010003100101011100111010110110010001010011001011011101000111010110011101001110110101000030011010
JHI-Hv50k-2016-281660 5 18 11110000111000101101011010101110000100100011100111000110111010001010011000011011101000111010110011101001010110101000000011010
JHI-Hv50k-2016-281717 5 18 11110000111000101101011010101110000100100011100111000110111010001010011000011011101000111010110011101001010100101000000011010
JHI-Hv50k-2016-281741 5 18 11110000111000101101011010101110000100100011100111000110111010001010011000011010101000111010110011101001010100101000000011010
JHI-Hv50k-2016-281958 5 18 11110000111000101101011010101110000100100011100111000110111010001010011100011010101000111010110011101001010100101000000011010
BOPA1_ABC01741-1-4-299 5 18 11110000111000101101011011101110000100100011100111000110111010001010011100011010101000111010110011101001010100101000000011010
JHI-Hv50k-2016-282203 5 18 11110000111000101101011011101110000100100011100111000110111010001010011100011010101000111010110011111001010100101000000011010
SCRI_RS_7720 5 19 11110000111000101101011011101110000100100011100111000110111000001000011100011010001000111010110011111001010100101000000011010
JHI-Hv50k-2016-282698 5 19 11110000111000101101011011101110000100100011100111000110111000001000011100011010001000111010110011111001000100101000000011010
JHI-Hv50k-2016-283047 5 19 11110000111000101101011011101110000100100011100111000110111000001000011100011010001000111010110011111001000100101000000011110
JHI-Hv50k-2016-283618 5 19 11110000111000101101011011101110000100100011100111000110111000001000011100011010001000111010110001111001000100101000000011110
JHI-Hv50k-2016-283746 5 21 11110001111000101101011011101110000100100011101111000110111000001000011100011010001000111010110001111011000100101100000011110
JHI-Hv50k-2016-283861 5 21 11110001111000101101011011101110000100100011101111000110111000001000011100011010001000111010110001111011001100301100000011110
JHI-Hv50k-2016-284198 5 21 11110001111000101101011011101110000100100011101111000110111000001000011000011010001000111010110001111011001100301100000011110
SCRI_RS_156016 5 21 11110001111000101101011011101110000100100011101111000110111000001000011000011010001000111010110001111011001100301100000111110
JHI-Hv50k-2016-284404 5 23 11111001111000101101011011101110000100100011101111000110111000001000011000001010001000111010110001111001001100311100000111110
JHI-Hv50k-2016-284988 5 24 10111001111000101101011011131110000101100011101111000110111000001000011000001010001000111010110001111001001100311100000111113
JHI-Hv50k-2016-285349 5 25 10111000111000101101011011131110000101100011101111100110111000001000011000001010001000111010110001111001001100311100000111113
JHI-Hv50k-2016-285304 5 26 10111000110000101101011011131110000101100011101111100110111000001000011000001010001000111011110001111001001100311100000111113
JHI-Hv50k-2016-285845 5 26 10111000110100101101011011131110000101100011101111100110111000001000011000001010001000111011110001111001001100111100000111111
JHI-Hv50k-2016-286076 5 28 10111000110100101101011011131110100101100111101111100100111000001000011000001010001000111011110011111001001100311100000111113
JHI-Hv50k-2016-286861 5 30 10111000110100101101011011101110100101100111101111110100111000001000011000001010011100110011110011111001001100011100000111110
JHI-Hv50k-2016-286923 5 30 10111000110100101101011011131110100101100101101111110100111000001000011000001010011100110011110011113001001103311100000111113
JHI-Hv50k-2016-287160 5 30 10111000110101101101011011131110100101100101101111110100111000001000011000001010011100110011110011113001001103311100000111113
JHI-Hv50k-2016-287267 5 30 10111000110101101101011011131110100101100101101111110100011000001000011000001010011100110011110011113001001103311100000111113
JHI-Hv50k-2016-289452 5 30 10111000110101101101011011131110100101100101101111110100011000001000011000001010010100110011110011113001001103311100000111113
JHI-Hv50k-2016-289697 5 30 10111000110101101101011011131110100101100101101111110100011000001000011000001010010100110011010011113001001103311100000111113
JHI-Hv50k-2016-290581 5 31 00111000110101101101011011131110100101100101101111110100011000000000011000001010010100110011010011113001001103311100000111113
SCRI_RS_41519 5 31 00111000110101101101011011131110100101100101101111110100011000000000011000000010010100110011010011110001001103011100000111113
JHI-Hv50k-2016-299558 5 31 00111000110101101101011011131110100101100101101111110110011000000000011000000010010100110011010011110001001103011100000111113
JHI-Hv50k-2016-300092 5 31 00111000110101101101011011131110101101100101101111110110011000000000011000000010010100110011310011110001001103011100000111113
JHI-Hv50k-2016-300156 5 31 00111000110101101101011011131110101100100101101111110110011000000000011000000010010100110011310011110001001103011100000111111
JHI-Hv50k-2016-301766 5 31 00111000110101101101011011131010101100100101101111110110011000000000011000000010010100110011310011110001001103011100000111111
JHI-Hv50k-2016-303071 5 31 00111000110101101111011011131010101100100101101111110110011000000000011000000010010100110011310011110001001103011100000111111
BOPA2_12_31280 5 32 00111000110101101111011011111010101100130101101111110110011000000000011000001010010100110011110011110001101101011100000111111
JHI-Hv50k-2016-304298 5 32 00111000110101101111011011131010101100100101101111110110011000000000011100001010010100110011310011110001101103011100000111111
JHI-Hv50k-2016-304801 5 32 00111000110101101111011011131010101100100101101111110110011000000000011100001010010100110011310011110001101103011100000110111
JHI-Hv50k-2016-304977 5 32 00111000110101101111011011131010101100100101101111110110011000000000011100001010010100110011310001110001101103011100000110111
JHI-Hv50k-2016-305138 5 32 00111000110101101111011011131011101100100101101111110110011000000000011100001010010100110011310001110001101103011100000110111
JHI-Hv50k-2016-306738 5 34 00111010110101101110011011111011101100100101101111110110011000000000011100001010010100110011310001101001101103011100000110111
JHI-Hv50k-2016-306833 5 34 00111010110101101110011011111011101100100101101111110110011000000000011100001010010100110011310001101011101103011100000110111
JHI-Hv50k-2016-306899 5 34 00111010110101101110011011111011101100100101101111110110011000000000011100001010010100110011310001101011101103011100000110110
JHI-Hv50k-2016-306976 5 34 00111010110101101110011011111011101100100101101111110110011000000001011100001010010100110011310001101011101103011100000110110
JHI-Hv50k-2016-307231 5 34 00111010110101101110011011111011101100100101101111110010011000000001011100001010010100110011310001101011101103011100000110110
JHI-Hv50k-2016-307400 5 34 00111010110101101110011011111011101100101101101111110010011000000001011100001010010100110011310001101011101103011100000110110
JHI-Hv50k-2016-307445 5 34 00111010110101101110011011111011101100101101101111110010011000000001011101001010010100110011310001101111101103011100000110110
JHI-Hv50k-2016-307448 5 34 00111010110101101110011011111011101100101111101111110010011000000001011101001010010100110011310001101111101103011100000110110
JHI-Hv50k-2016-307469 5 34 00111010110101101110011011111011101100101101101111110010011000000001011100001010010100110011310001101111101103011100000110110
JHI-Hv50k-2016-307490 5 34 00111010110101101110011011111011101101101111101111110010011000000001011101001010010100110011310001101111101103011100000110110
JHI-Hv50k-2016-307532 5 35 00111011110101101110011011110011101101101111101111110010011000000001011101001010010100110011310001101111101103011100000110110
BOPA1_7504-485 5 37 01111011110101101110011011110011101101101111101111110010011000000001011101001010000000110011310001101111101101111100000110110
JHI-Hv50k-2016-308340 5 38 01111011110101101110011011110011101101101111101111110010011000000001011101001010000000110011310000101111101103111100000110111
JHI-Hv50k-2016-308409 5 38 01111011110101101110011011110011101101101111101111110010011000000001011101001110000000110011310000101111101103111100000110111
JHI-Hv50k-2016-308564 5 38 01011011110101101110011011110011101101101111101111110010011000000001011101001110000000110011310000101111101103111100000110111
JHI-Hv50k-2016-308562 5 38 01011011110101101110011011110011101101101111101111110010011000000001011111001110000000110011310000101111101103111100000110111
JHI-Hv50k-2016-308537 5 38 01011011110101101110011011110011101101101111101111110010011000000001011101001110000000110011310000101111101103111100000110111
JHI-Hv50k-2016-308570 5 39 01011011110111101110011011110011101101101111101111110010011000000001011101001110000000110011310010101111101103111100000110111
JHI-Hv50k-2016-308620 5 39 00011011110111101110011011110011101101101111101111110010011000000001011101001110000000110011310010101111101103111100000110111
JHI-Hv50k-2016-308753 5 39 00011011110111101110011011110011101101101111101111110010011000000001011101001110000000110001310010101111101103111100000110111
JHI-Hv50k-2016-308845 5 39 00011011110111101110011011110011101101101111101111110010011000000001011101001110000000110001310010101111101103110100000110111
JHI-Hv50k-2016-308901 5 41 00011011110111101110011011110011101101101111101111110010011000110001011101001110000000110001310010001111101103110100000110011
JHI-Hv50k-2016-309085 5 43 00011011110111101110011011110011101101100111101111110010011010111011111101001110000000110001010010001111101103110100000110011
JHI-Hv50k-2016-309620 5 44 00011011110111101110011011110011101101100111101111110010311010111011111101001110000000110001110010001101101103110100000110011
JHI-Hv50k-2016-309828 5 45 00011011110111101110011011110011100101101111101111110010311010111011111101001110000000110001110010001101101103110100000110011
JHI-Hv50k-2016-309802 5 45 00011011110111101110011011110011100101101111101111110010310010111011111101001110000000110001110010001101101103110100000110011
JHI-Hv50k-2016-310290 5 46 00010011110111101110011011110011100101101110101111110010010010111011111101001110000000110001110010031101101003110100000110011
JHI-Hv50k-2016-310468 5 49 00010011110111101110011011110001101101101110111111110010010010011011111103011110000000110001110010031101101013110100000110011
JHI-Hv50k-2016-310515 5 49 00010011110111101110011011110001101101101110111111110010010010011011111103011110000000110001110010031101101013110100001110011
JHI-Hv50k-2016-311179 5 51 00010011110111101110011011110001101101101110111110110010110010011011111103011110000000110001110000001101101013110100001110111
SCRI_RS_160332 5 52 00010011110111101110011011110001101101111110111110110010110010011011111103011100000000110001110000031101101013110100031110111
JHI-Hv50k-2016-311410 5 52 00010011110111101110011011110001101101111110111110130000110010011011111103011100000000110001110000031101101011110100031110111
JHI-Hv50k-2016-311927 5 53 00010011110111101110011011110001101100111110111110130000110010011011111103011100000000110000110000011101100011110100011110111
JHI-Hv50k-2016-311960 5 53 00010011110111101110011011110001101100111110111110130000110010011011111103011100000000110000110000031001100011110100031110111
JHI-Hv50k-2016-314355 5 54 00310011110111101110011010110001101100111110111110130000110010011011111103111100000000110000110000031001100011110100031110111
JHI-Hv50k-2016-315503 5 54 00310011110111101113011010110001101100111110111110130000010010011011111103111100000000110000110000031001100011110100031110111
JHI-Hv50k-2016-315998 5 54 00310011110111101113011010110001101100111110111110130000010010011011111103111100000000110000110000031011100011110100011110111
JHI-Hv50k-2016-316065 5 54 00310011110111101111011010110001101100111110111110130000010010011011111103111100000000110000110000031011000011110100011110111
JHI-Hv50k-2016-316492 5 54 00110011110111101111011010110001101110111110111110130000010010011011111103111100000000110000110000031011000011110100011110111
JHI-Hv50k-2016-316833 5 55 00110011110111101111011010110001101110111110111110100000010010011011111103101100000000110000110000031011000011110101011110111
JHI-Hv50k-2016-317067 5 55 00110011110111101111011010110031101110111110111110100000010010011011111113101100000000110000110000031011000011110101011110111
JHI-Hv50k-2016-317277 5 55 00110011110111101111011010110031101010111110111110100000010010011011111113101100000000110000110000031011000011110101011110111
JHI-Hv50k-2016-317701 5 55 00110011110111101111011010110011101010111110111110100000010010011011111113101100000000110000110100031011000011110101011110111
JHI-Hv50k-2016-318073 5 55 00110011110111101111011010110011101010111110111110100000110010011011111133101100000000110000110100031011000011110101011110111
JHI-Hv50k-2016-318116 5 55 00110011110111101111011010110011101010111100111110100000110010011011111133101100000000110000110100031011000011110101011110111
JHI-Hv50k-2016-318341 5 55 00110011110111101111011310110011101010011100111110100000110010311011111131101100000000110000110100031011000011110101011110111
JHI-Hv50k-2016-318389 5 55 00110011110111101111001310110011101010011100111110100000110010311011111131101100000000110000110100031011000011110101011110111
JHI-Hv50k-2016-318697 5 55 00110011110111101111001310110011101010011100111110100000110010311011111111101100000000110000110100011011000011110100011110111
JHI-Hv50k-2016-318569 5 55 00110011110111101111001310110011101010011100111110100000110010011011101111101100000000110000110100011011000011110100011110111
JHI-Hv50k-2016-319018 5 57 00110011110111101111001310110011101010111101111110100001110010311011101111101100000000110000110100011011100011100100011110111
JHI-Hv50k-2016-319359 5 57 00110011110111101111001310110011101010111101101110100001110010311011101111101100000000110000110100011011100011100100011110111
JHI-Hv50k-2016-319468 5 57 00110011110111101111001310110011101010111101101110110001110010311011101111101100000000110000110100011011100011100100011110111
JHI-Hv50k-2016-319956 5 57 00110011110111101111001310110011101010111101101100110001110010311011101111101100000000110000110100011011100011100100031110111
JHI-Hv50k-2016-319876 5 57 00110011110111101111001310110011101010111101101100110001110010311011101111101100100000110000110100011011100011100100031110111
SCRI_RS_237352 5 57 00110011110111101111001110110011101010111101101100110001110010311011101111101101100000110000110100011011100011100100031110111
JHI-Hv50k-2016-320870 5 57 00110011110111101111001110110011101010111101101100110001110010311011101111101101100000110000010100011011100011100100031110111
JHI-Hv50k-2016-321066 5 57 00110011110111101111001110110011101010111101101100110001110010311011001111101101100000110000010100011011100311100100031110111
JHI-Hv50k-2016-321943 5 60 00111001110111101111001110110011101010111101101100100001110010111011001111101101100000111000010110111011100011100100131111111
JHI-Hv50k-2016-322893 5 63 10011101110113101111001110110011101011111101101100100000110010111011001111101101100000011000010110110011100011100100131111111
JHI-Hv50k-2016-323037 5 64 10011101110113101111001110110011101011101101101100100000110010111011000111101101100000011000010110110011300011100100131111111
JHI-Hv50k-2016-323162 5 64 10011101110113101111001110110011101011101101101100100100110010111011000111101101100000011000010110110011300011100100101111111
JHI-Hv50k-2016-323471 5 64 10011101110113101111001110110011101011111101101100100130110010111011000111101101100000011000010110110011300011100100101111111
JHI-Hv50k-2016-323825 5 64 10011101110113101011001110110011101011111101101100100130110010111011000111101101100000011000010110110011300011100100101111111
SCRI_RS_149088 5 65 10011101110113101011001110110011100011101101101100100130110010111011000111101101100010011000010110110011300011100100101111111
JHI-Hv50k-2016-324018 5 65 10011101110113101011001110110011100111101101101100100130110010111011000111101101100010011000010110110011300011100100101111111
BOPA1_5154-117 5 65 10011101110113101011001110110011100111101101101100100130110010111011000111101101100010011000010111110011300011100100101111111
JHI-Hv50k-2016-325051 5 66 10013101110110101011001110110011300111101101101100101100130010111011000111101101100010011000010113110031000011100000101113111
JHI-Hv50k-2016-325133 5 66 10011131110113101011001110110011100111101101101100101110110010111011000111101101100010011000010111110011300011100300101111111
JHI-Hv50k-2016-326122 5 66 10011131110111101011001110110011100111101101101100101110110010111011000111101101100010011000010111010011300011100300101111111
JHI-Hv50k-2016-326289 5 67 10011131110111101011001110100011100111111101101100101110110010111011000111101101100010011000010111010011300011100300101111111
JHI-Hv50k-2016-326704 5 67 10011131110111101011001110100011100111111101101100101110110110111011000111101101100010011000010111010011300011100300101111111
JHI-Hv50k-2016-326790 5 67 10011131110111101011001110100011100111111101101100101110110110111011000111101101100010011000010111030011300011101300101111111
JHI-Hv50k-2016-327212 5 67 10011131110111101011001110100011100111111101101100101110110110111011000111101101100010011000010111030011300011101301101111111
SCRI_RS_156454 5 67 10011131110111101011001110100011100111111101101100101110110110111011000111101101100010011000010110030011000011101101101111111
JHI-Hv50k-2016-328699 5 67 10011131110111101011001110100011100111111101101100101110110110111011000111101101100010011010010110030011000011101101101111111
JHI-Hv50k-2016-329411 5 68 10011131110111101011001110100011100111111101101100101110110110111010000101101101100010011010010110030011000011101101101111111
JHI-Hv50k-2016-330383 5 68 10011131110111101011001110100011100111111101101100101110110110111010000101101101100010011010010111030011000311101101101111111
JHI-Hv50k-2016-330793 587,812,321 5 69 10011131110111101011001110100011101111111101101100101110110110111010000100101101100010011010010111030011000311101101101111111
SCRI_RS_234330 5 69 10011101110111101011001110100011101111011101101100101110110110111010000100101101100010011010010111030011000311101101101111111
JHI-Hv50k-2016-332845 5 69 10011131110111101011001110100011101111011101101100101110110110111010000100101101100010011010010111030011000311101101101011111
SCRI_RS_159490 5 69 10011131110111101011001110100011101111011101101100101110110110111010000101101101100010011010010111030011000311101101101011111
SCRI_RS_202774 5 69 10011131110111101011001110100011101111011101101100101110110110111010000100101101100010011010010111030011000311101101101011111
JHI-Hv50k-2016-333100 5 69 10011131110111111011001110100011101111011101101100101110110110111010000100101101100010011010010111030011000311101101101011111
BOPA1_ABC04322-1-3-208 5 69 10011131111111111011001110100011101111011101101100101110110110111010000100101101100010011010010111030011000011101101101011111
SCRI_RS_130992 5 69 10011131111111111011001110100011101111011101101100101110110110111010000100101001100010011010010111030011000011101101101011111
JHI-Hv50k-2016-335217 5 70 10011131111111111011001110100011101111010101101100101110110110111010000100101001100010011010010111030011000011101101101010111
JHI-Hv50k-2016-336642 5 71 10011131111111111011001110100011101111010101101000101110110110101010000100101001100010011010010111030011000011101101101010111
JHI-Hv50k-2016-337137 5 71 11011131111111111011001110100011101111010101101000101110110110101010000100101001100010011010010111030011000011101101101010111
JHI-Hv50k-2016-337339 5 71 11011131111111111011001110100011101111010101101000101110110110101010000100101001100010011010010111030011001011101101101010111
JHI-Hv50k-2016-337630 5 71 11011131111111111011001110100011101111010101101000101110110110101010010100101001100010011010010111030011001011101101101010111
JHI-Hv50k-2016-337652 5 71 11011131111111111011001110100011101101010101101000101110110110101010010100101001100010011010010111030011001011101101101010111
JHI-Hv50k-2016-338482 5 71 11011131111111111011001110100011101101010001101000101110110110101010010100101001100010011010010111030011001011101101101010111
JHI-Hv50k-2016-338592 5 71 11011131111111111011001110100011101101010001101000101110110113101010010100101001000010011010010111030011001011101301101010111
JHI-Hv50k-2016-338786 5 71 11011131111111111011001110100011101101010001101000101110110113101010010100101001000010111010010111030011001011101301101010111
JHI-Hv50k-2016-338822 5 71 11011131111111111011001110100001101101010001101000101110110113101010010100101001000010111010010111030011001011101301101010111
JHI-Hv50k-2016-340661 5 74 11011031111111111011001100100001101101010001000000111110110113101010010100101001000010111010010110030011001011101301100010111
JHI-Hv50k-2016-340747 5 74 11011031111111111011001100100001101101010001000000111110110113101010010100101001000010111010010110030011001011101301101010111
JHI-Hv50k-2016-341199 5 74 11011031101111111011001100100001101101010001000000111110110113101010010100101001000010111010010110030011001011101301100010111
JHI-Hv50k-2016-341542 5 74 11011001101111111011001100100001101101010001000000111110110113101010010100101001000010111010010110030010001011101301100010111
JHI-Hv50k-2016-342119 5 74 11011001101111111011001100100001101101010001000000111110110113101010110100101001000010111010010110030010001011101301100010111
JHI-Hv50k-2016-342023 5 74 11011001101111011011001100100001101101010001000000111110110113101010110100101001000010111010010110030010001311101301100010111
SCRI_RS_105705 5 74 11011001101111011011001100100001101101010001000000111110110113101010110100101001000010111010010110001010001311101301100010111
JHI-Hv50k-2016-343060 5 74 11011001101111011011001100100001100101010001000000111110110113101010110100101001000010111010010110001010001111101301100010111
SCRI_RS_146573 5 74 11011001101111011011001100100001100101010001000000111110010111101010110100101001000010111010010110001010001111101001100010111
JHI-Hv50k-2016-344176 5 76 11011001101111011011001100100001100101010003000000111110010111101011110100101001000011111010010100001010001110101001100010111
JHI-Hv50k-2016-344250 5 76 11011001101111011011001100100001100101010003001000111110010111101011110100101001000011111010010100001010001110101001100010111
JHI-Hv50k-2016-344481 5 76 11011001101111011011001100100001100101010003001000111110010111101011110100101001000011101010010100001010001110101001100010111
JHI-Hv50k-2016-344701 5 76 11011001101111011011001100100001100101010003001000111110010111101011110100101001000011101010010100001010001110101000100010111
JHI-Hv50k-2016-345242 5 76 11011001101111011011001100100001100101010003001000111110000111101011110100101001000011101010010100001010001110101000100010111
JHI-Hv50k-2016-346074 5 76 11011001101111011011001100101001100101010003001000111110000111101011110100101001000011101010010100001010001110101000100010111
JHI-Hv50k-2016-346486 5 77 11011001101111011011001100101001100101010001001000111110000111100011110100101001000011101010010100001010001110101001100010111
JHI-Hv50k-2016-346661 5 77 11011001101111011011001100101001100101010001001000111110000111100011113100101001000011101010000100001010001110101001100010111
JHI-Hv50k-2016-346997 5 78 11011001101101011010001100101001100101010000001000111110000111100011113100101001000011101010000100001010001110101001100010111
JHI-Hv50k-2016-347237 5 78 11011001101101011010001100101001100101010000001000111110000111000011113100101001000011101010000100001010001110101001100010111
JHI-Hv50k-2016-347866 5 79 11011001101101011010001100101001100101010000001000111110000111000011113100101001000011131010000100000010001110101101100010111
JHI-Hv50k-2016-348033 5 79 11011001101101011010001100101001100101010000001000111010000111000011113100101001000011131010000100000010001110101101100010111
JHI-Hv50k-2016-348257 5 79 11011001101101011010001100101001100101010000001000111010000111000011113100101001000011131010000100000010001110100101100010111
JHI-Hv50k-2016-348345 5 80 11011001101101011010001100101001100101010000001000111010000111001011113100101001000011111010000100000010001110100001100010111
JHI-Hv50k-2016-348405 5 80 11011001101101011010001100101001100101010000001000111010000111001011113100101001000011111010000100000110001110100001100010111
JHI-Hv50k-2016-348621 5 80 11011001101101011010001100101001100101010000001000111010000111001011110100101001000011111110000100000110001110100001100010111
JHI-Hv50k-2016-350540 5 83 11011011101101011110001101001001103101010000001000011010000111001011113100101011000011111110000100010110001110100001100010111
JHI-Hv50k-2016-350801 5 84 11010011101101011110001101001001103001010000001000011010000111001011113100101011000011111110000100010110001110100001100010111
JHI-Hv50k-2016-351353 5 84 11010011101101011110001101001001103001010000001000011010000111001011113100101011000011111110000100000110001110100001100010111
JHI-Hv50k-2016-352376 5 84 11010011101001011110001101001001103001010000001000011010000111001011113100101011000011111110000100000110001110100001100010111
JHI-Hv50k-2016-352989 5 85 11010011101001011110001101001001101001010000001000011010000111000011113100101111000011111110000100000110000110100001100010111
JHI-Hv50k-2016-354659 5 85 11010010101001011110001101001001101001010000001000011010000111000011110100101111000011111110300100000110000110100001100010111
SCRI_RS_12757 5 85 11010010101001011110001101001001101001010000001000011010000111000011110100101111000011111110100100000110000110100001000010111
JHI-Hv50k-2016-355011 5 86 11010010101001011110001101001001111001010000001100011010000111000011110100101111000011111110100100000110000110100001000010111
JHI-Hv50k-2016-355052 5 86 11010010101001011110001101001001111001010000001100011010000111000011100100101111000011111110100100000110000110100001000010111
JHI-Hv50k-2016-355148 5 86 11010010101001011110001101001001111001010000001100011010000111000011100000101111000011111110100100000110000110100001000010111
JHI-Hv50k-2016-355620 5 87 11010010101001011110001111001001111001010000001100011010000110000011100000101111000011111110100100000110000110100001000010111
JHI-Hv50k-2016-355798 5 87 11010010101001011110001111001001111001010000001100011010000110000011100000101111000011111111100100000110000110100001000010111
JHI-Hv50k-2016-355845 5 87 11010010101001011110001111001001111001010000001100011010000110000011100000101111000011111111100100000110000111100001000010111
JHI-Hv50k-2016-357186 5 87 11010010101001011110001111001011111001010000001100011010000110000011100000101111000011111111100100000110000111100001000010111
JHI-Hv50k-2016-357474 5 88 11010010101001011100001111001011111001010000001110011010000110000011100000101111000011111111100100000110000111100001000010111
JHI-Hv50k-2016-357548 5 88 11010010101001011100001111001011111001010000001110011010000110000011100001101111000011111111100100000110000111100001000010111
JHI-Hv50k-2016-357638 5 88 11010010101001011100001111001011111001010000000110011010000110000011100001101111000011111111100100000110000111100001000010111
JHI-Hv50k-2016-358019 5 88 11010010001001011100001111001011111001010000000110011010000110000011100001101111000011111111100100000110000111100001000010111
JHI-Hv50k-2016-358085 5 88 11010010001001011100000111001011111001010000000110011010000110000011100001101111000011111111100100000110000111100001000010111
JHI-Hv50k-2016-358581 5 88 11010010001001011100000111001011111001010000000110011010000110000011100001101111000011111111000100000110000111100001000010111
JHI-Hv50k-2016-358922 5 89 11010010001001011100001111001011111001010000000110011010000110000011100001101111000001111111000100000110000111100001000010111
JHI-Hv50k-2016-359473 5 89 11010010001001011100003111001011111001010000000110011010000110000011100001101111000001111111000100010110000111100001000010111
JHI-Hv50k-2016-360277 5 89 11010010001001011100003111001011111001010010000110011010000110000011100001101111000001111111000100010110000111100001000010111
JHI-Hv50k-2016-360994 5 89 11010010001001001100003111001011111001010010000110011010000110000011100001101111000001111111000100010110000111100001000010111
JHI-Hv50k-2016-361316 5 90 11010010001001001100003111001011111001010010000110011011000110000011100001101111000001111111000100010110010111100001000010113
JHI-Hv50k-2016-361989 5 91 11010010000001001100003111001011111001010010000110011011000110000011100001101111000001111111100100010110010111100001000010110
JHI-Hv50k-2016-362167 5 92 11010010000001001100003111001011111001010010000110011011000110000011100001101111000000111111100100010110010111100011000010110
JHI-Hv50k-2016-362291 5 93 11010010000001001100003111001011111001010010000110011011000110010011100001101111000000111111100100010110010111000011000010110
JHI-Hv50k-2016-363828 5 94 11010010000001001100003111001011111001010010000110011011000110010011100001101101000010111111100100011110010111000011000010110
JHI-Hv50k-2016-364347 5 95 11010010000001001100003111001011111001010010000110011011000110010011101001101101000010111101100100011110010111001011000010110
JHI-Hv50k-2016-365175 5 95 11010010000001001100003111001011111011010010000110011011000110010011101001101101000010111101100100011110010111001011000010110
JHI-Hv50k-2016-366123 5 96 11010010000001001100003111001011111011010010000110011011000110110011101001101101101010111101100100011110010011001011000010110
JHI-Hv50k-2016-367376 5 96 11010010000001001100003111001011111011010010000110011011000110010011101001101101001010111101100100011110010011001011000010110
JHI-Hv50k-2016-367738 5 96 11010010000001001100003111001011111011010010000110011011000110010011101001101101101010111101100100011110010011001011000010110
JHI-Hv50k-2016-367933 6 0 01100111101011100110101001100100111011100011001110001001010000010101000110010001110110100011101000100110100111100001101100000
JHI-Hv50k-2016-368411 6 1 01100111101011100110101001100100111011110011001110001001010000010101100110010001110110100011101000100110100111100001101100000
JHI-Hv50k-2016-368775 6 1 01100111101011100110100001100100111011110011001110001001010000010101100110010001110110100011101000100110100111100001101100000
JHI-Hv50k-2016-368750 6 1 01100111101011100110100001100100111011100011001110001001010000010101100110010001110110100011101000100110100111100001101100000
JHI-Hv50k-2016-369161 6 0 01100011101011100110101001100000111011100011001110001001010000010001000110010001110110100011101000100110100111100000100100000
JHI-Hv50k-2016-369951 6 0 01100011101011100110101001100000111011100011001110001001010000010301000110010001110110100011101000100110100111100001100100000
JHI-Hv50k-2016-370322 6 0 01100011101011100110101001100100111011100011001110001001010000010101000110010001110110100011101000100110100111100001100100000
JHI-Hv50k-2016-370455 6 0 01100111101011100110101001100100111011100011001110001001010000010101000110010001110110100011101000100110100111100001100100000
BOPA1_ABC25019-1-8-280 6 2 01100111101011100110100001000100111011100111001110001001010000010101100110010001110110100011101000100110100111100001101100000
SCRI_RS_211856 6 2 01100111101001100110100001000100111011100111001110001001010000010101100110010001110110100011101000100110100111100001101100000
JHI-Hv50k-2016-371705 6 3 01100111101001100111100001000100111011100111001110001001010000010101100110010001110110100011001000100310100101100001101100000
JHI-Hv50k-2016-372059 6 5 01100111101001100111100001000000111010100111001110001001010000010101100110010001110110100111001000100310100101100011101100000
JHI-Hv50k-2016-372773 6 5 01100111101001100111100001000000111010110111001110001001010000010101100110010001110110100111001000100310100101100011101100000
JHI-Hv50k-2016-372938 6 5 01100111101001100111100001000000111010110111001110001001010000010101100110010001110110101111001000100310100101100011101100000
BOPA1_5993-2383 6 5 01100111101001100111100001000000111011110111001110001001010000010101100110010001110110101111001000100310100101100011101100000
JHI-Hv50k-2016-372999 6 5 01100111101001100111110001000000111011110111001110001001010000010101100110010001110110101111001000100310100101100011101100000
JHI-Hv50k-2016-373396 6 5 01100111101001100111110001000000111011100111001110001001010000010101100110010001110110101111001000100310100101100011101100000
JHI-Hv50k-2016-373479 6 5 01100111101001100111110001000000111011100111001110001001010000010101100110010001110110101111001000100310100101100011101000000
JHI-Hv50k-2016-373554 6 5 01100111101001100111110000000000111011100111001110001001010000010101100110010001110110101111001000100310100101100011101000010
JHI-Hv50k-2016-373654 6 5 01100111101001100111110001000000111011100111001110001001010000010101100110010001110110101111001000100310100101100011101000010
JHI-Hv50k-2016-373745 6 6 01100111101001100101110000000000111011100111011110001001010000010001100110010001110110101111001000100310100101100011101000010
JHI-Hv50k-2016-373942 6 5 01100111101001100111110000000000111011100111001110001001010000010001100110010001110110101111001000100310100101100011101000010
JHI-Hv50k-2016-374148 6 6 01100111101001100101110000000000111011100111011110001001010000010001100110010001110110101111001000100310100101000011101000010
JHI-Hv50k-2016-375644 6 6 01100111101001100101110000000000111011100111011110001001010000010001100110010000110110101111001000100310100101000011101000010
JHI-Hv50k-2016-375790 6 6 01100111101001100101110000000010111011100111011110001001010000010001100110010000110110101111001000100310100101000011101000010
JHI-Hv50k-2016-376061 6 6 01100111111001100101110000000010111011100111011110001001010000010001100110010000110110101111001000100110100101000011101000010
JHI-Hv50k-2016-376441 6 6 01100111111011100101110000000010111011100111011110001001010000010001100110010000110110101111001000100110100101000011101000010
JHI-Hv50k-2016-376707 6 6 01100111111011100101110000001010111011100111011110001001010000010001100110010000110110101111001000100110100101000011101000010
JHI-Hv50k-2016-376871 6 7 01100111111011100101110000001010111011100111011110001001010000010001100110010001110110101111001000100110100101001011101000010
JHI-Hv50k-2016-377159 6 8 01000111111011100101110000001010111011100111011110001001010000010001100110010011110110101111001000100110100101001011101000010
JHI-Hv50k-2016-377672 6 8 01000101111111100101110000001010111011100111011110001001010000011001100110010011110110101111001000100110100101001011101000010
JHI-Hv50k-2016-377677 6 8 01000101111311100101110000001010111011100111011110001001010000010001100110010011110110101111001000100110100101001011101000010
JHI-Hv50k-2016-377566 6 8 01000101111311100101110000001010111011100111011110001001010001011001100110010011110110101111001000100110100101001011101000010
JHI-Hv50k-2016-378008 6 10 31000101110311100101113100001010101011100111011111001001010001011001100110010011110110101111001000100110100101001011101000010
JHI-Hv50k-2016-378295 6 14 01000101110011100100013100001010101011110111011110001001010001011001100010010011110110101111001110110100100101001031111000010
JHI-Hv50k-2016-378881 6 15 01000101110011100100013100001010101011110111011110101001010001011001100010010011110110101111001110110100100101001030111000010
JHI-Hv50k-2016-379030 6 15 01000101110011100100011100001010101011110111011110101001010001011001100011010011110110101111001110110100100101001030111000010
JHI-Hv50k-2016-379181 6 15 01000101110011100100013100001010101011110111011110101001010001011001100011010011110110101111001110110100000101001030111000010
JHI-Hv50k-2016-379197 6 15 01000101110001100100013100001010101011110111011110101001010001011001100011010011110110101111001110110100000101001030111000010
JHI-Hv50k-2016-379211 6 15 01000101110001100100013100011010101011110111011110101001010001011001100011010011110110101111001110110100000101001030111000010
JHI-Hv50k-2016-379274 6 15 01000101110001100100013100011010101011110111011110101001010001011001100011010011110110101111001110111100000101001030111000010
JHI-Hv50k-2016-379329 6 15 01000101110001100100013100011010101011110111011110101001010001011101100011010011110110101111001110111100000101001030111000010
JHI-Hv50k-2016-379530 6 16 01000101110001100100013100011000111011110111011110101001010001011101100011010011110110101111001110111100000101001030111000010
BOPA2_12_31485 6 16 01000101110001100100013100011000111011110111011110101001010001011101100011010011110110001111001110111100000101001030111000010
JHI-Hv50k-2016-379784 6 17 01000101110001100100013100011000111031110111011110101001010001011101100011010011110110001111011110111100011101001030111000010
JHI-Hv50k-2016-379948 6 19 01000101110001100100013100011001111031110110011110101001010000011101100011010111110110001111011110111100011101001030111000010
JHI-Hv50k-2016-380476 6 19 01000101110001100100013100011001111031110110011110101001010000011101100011010111110110001111011110111100011101001030111001010
JHI-Hv50k-2016-380911 6 20 01003101110001100100013100011001111031110110011110131001010000111101100011030111110110001011011110101100011101001000111001010
JHI-Hv50k-2016-380946 6 21 00003101110001100100013100011001110031110110011110031001010000111101100011030111110110001011011110101100011101001000111001010
BOPA2_12_30361 6 24 00003101110001100101013100011001110031110110011010031001010100111101101111030111110110001001011110101100011101001000111001010
JHI-Hv50k-2016-382199 6 24 00003101110001100101013100011001110031110110011010131001010100111101101111000111110110001001011110101100011101001000111001010
JHI-Hv50k-2016-382495 6 24 00003101110001100101013100011001110031110110011010131001010100111100101111001111110110001001011110101100011101001000111001010
SCRI_RS_102426 6 24 00003100110001100101013100011001110031110110011010131001010100111101101111001111110110001001011110101100011101001000111001010
JHI-Hv50k-2016-382546 6 24 00003101110001100101013100011001110031110110011010131001010100111101101111001111110110001001011110101100011101001000111001010
JHI-Hv50k-2016-383147 6 24 00003100110001100101013100011001110001110110011010131001010100111101101111000111110110001001011110101100011101001000111001010
JHI-Hv50k-2016-383447 6 24 00003101110001100101013100011001110031110110011010131001010100111100101111001111110110001001011110101110011101001000111001010
SCRI_RS_168118 6 24 00003101110001100101013100011001110031110110011010131001010100111100101111001111110110001000011110101110011101001000111001010
JHI-Hv50k-2016-383787 6 27 00103101110001100101013100011011110031110110111010111001010000111100101111001111110110011000011110101110011101011000111001010
SCRI_RS_162581 6 28 00113101110001101101013100011011110031110110111010111001010000111100101111001111110110011000011110101110011101011000111001010
JHI-Hv50k-2016-384979 6 28 00113101110001101101013100011011110031110110111010111001010000111100101111001111110110011000011110101110011101111000111001010
JHI-Hv50k-2016-385826 6 29 00113101110001101101010100011011110031110110110010111001010000111100101111001111110110011000011110101111011101111000111001010
BOPA1_2041-1317 6 29 00113101110001101101010100011011110031110110110010111001010000111100101111001111110110011000011110101111001101111000111001010
SCRI_RS_9980 6 29 00113101110001101101010100011011110031110110110010111001010000111000101111001111110110011000011110101111001101111000111001010
JHI-Hv50k-2016-393145 6 29 00113101110001101101010100011011110031110110110010111011010000111000101111001111110110011000011110101111001101111000111001010
JHI-Hv50k-2016-393168 6 29 00113101110011101101010100011011110031110110110010111011010000111000101111001111110110011000011110101111001101111000111001010
BOPA1_397-288 6 29 00113101110001101101010100011011110031110110110010111011010000111000101111001111110110011000011110101111001101111000111001010
JHI-Hv50k-2016-394764 6 29 00113101110001101101010100011011110001110110110110111011010000111000101111001111110110011000011110101111001101111000111001010
SCRI_RS_169672 6 30 00113101110001101101013100011011110031110110110111111011010000111000101111001111110110011000011110101111001101111000111011010
SCRI_RS_209993 6 30 00113101110001101101013100011011110031110110110111111011010000111000101111001111110110011000011110101011001101111000111011010
JHI-Hv50k-2016-407107 6 30 00110101110001101101013100011011110031110110110111011011010000111000101111001111110110011000011110101011001101111000111011010
JHI-Hv50k-2016-407207 6 31 00110101110001101101013100011011110031110110110111011010010100111000101111001111110110111000011110101011001101111000111011010
JHI-Hv50k-2016-407217 6 30 00110101110001101101013100011011110031110110110111011010010000111000101111001111110110011000011110101011001101111000111011010
BOPA1_8048-952 6 31 00110101110001101101013100011011110031110110110111011010010100111000101111001111110110101000011110101011001101111000111011010
BOPA1_8005-914 6 31 00110101110001101101013100011011110031110110110111011010010101111000101111001111110110101000031110101011001101111000111011010
SCRI_RS_219632 6 31 00110101110001101101011100011011110031110110110110011010010101111000101111001111110110101000031110101011001101111000111011010
SCRI_RS_165986 6 32 00110101110101101101011100011011110031110110110110011010010101111000101111011111110110101000031110101011001101111000111011010
SCRI_RS_5787 6 32 00110101110101101101011100011011110031110110110110011010000101111000101111011111110110101000001110101011001101111000111011010
BOPA1_1096-1482 6 32 00110101110101101101011100011011110011110110110110011010000101111000101111011111110110001000001110101011001101111000111011010
SCRI_RS_205971 6 34 00110101110001101101011100011011010011110110110110011010000101111000101111011110110110001000001110101011001101111000111111010
JHI-Hv50k-2016-413434 6 36 00110101110001101101010100011011010011110110110110011011000101111001101111011010110110031000001110101011001101111000111101010
SCRI_RS_228493 6 37 00110101110001101101010100011011010011110110110110011011000101110001101111011011110110031000001110101011001101111000111111010
JHI-Hv50k-2016-413704 6 37 00110101110001101101010100011011010011110110110110011011000101110001101111011010110110031000001110101011001101111000111111010
SCRI_RS_207284 6 38 00110101110001111101010100011011010011010110110110011011000101110001101111011010110110031000101110101011001101111000111111010
SCRI_RS_217187 6 38 00110101110001111101010100011011010011010110110110011011000101110001101111011010110110031000101111101011001101111000111111010
SCRI_RS_238393 6 40 00110101110001111111010100011011010011010110110110011011000101110001101111111000110110031000101111101011101101111000111111010
SCRI_RS_170674 6 40 00110101110001111111010100011011010011010110110110011011000101110001101111111000110110031001101111101011101101111000111111010
SCRI_RS_153166 6 43 00110101110010111111010100001011010011010110110110011011010101110101101111110000010110031001101011101011101101111000111113010
JHI-Hv50k-2016-416678 6 44 00110101110010111111010101001011010011010110110110311011010101110101101111110000010110031001101011101011101101111001111113010
SCRI_RS_736 6 45 00110101110110111111010101001011010011010110110110311011010101110101101111110000010111031001101011101011101101111001111113010
SCRI_RS_167497 6 46 00110101010110111111010101001011010011010110110110111011010101110101101111110000010111031001101011101011101101111011111113010
JHI-Hv50k-2016-418570 6 53 00110100010110111110010101001111010011010111110110301011010101010100101011110000010101011003100001101011101101101010110103010
JHI-Hv50k-2016-419085 6 55 00100100010110111110010101001111010011011111110110301011010101010100101011110000010101111000000001101011101101001010110103010
BOPA2_12_31432 6 55 00100100010110111110010101001111110011011111110110301011010101010100101011110000010101111000000001101011101101001010110103010
JHI-Hv50k-2016-419303 6 55 00100100000110111110010101001111110011011111110110101011010101010100101011110000010101111000000001101011101101001010110103010
JHI-Hv50k-2016-419579 6 55 00100100000110111110010101001111110011011111110110101011010101010100101011110000010101111000000001101011101101001000110103010
SCRI_RS_124224 6 55 00100100000110111110010101001111110011011111110110101001010101010100101011110000010101111000000001101011101101001000110103010
JHI-Hv50k-2016-420036 6 55 00100100000110111110010101001111111011011111110110101001010101010100101011110000010101111000000001101011101101001000110103010
BOPA1_5124-1707 6 55 00100100000110111110010101001111111011011111110110101001010101010100101011110000010101111000000001101011101101001000100103010
JHI-Hv50k-2016-420408 6 56 00100100000110111110010101001110111011011111110110301001010101010100101011110000010101111000000000101011101101001000100101010
JHI-Hv50k-2016-421152 6 56 00100100000110111110010101001110111001011111111110301001010101010100101011110000010101111000000000101011101101001000300101010
JHI-Hv50k-2016-421248 6 57 10100100000110111110010101001110111001011101111110001001010101010100101011110000010101111000000000101011101101001000300101010
JHI-Hv50k-2016-421340 6 58 10100100000110111110010101001110111001011101111010001001010101010100101011110000010101110000000000101011101101001000300101010
SCRI_RS_223732 6 59 10100100000110111110010101001110111011011101111010001001010101010100101011110000000001110000000000101011101101001000300101010
JHI-Hv50k-2016-421777 6 60 10100100000110111110110101001110111011011101111013001001010101010100101011110000000001110000000000101111101101001000300101013
SCRI_RS_202438 6 60 10100100000110111110110101101110111011011101111013001001010101010100101011110000000001110000000000101111101101001000300101013
SCRI_RS_8034 6 60 10100100000110101110110101101110111011011101111013001001010101010100101011110000000001110000000000101111101101001000300101013
JHI-Hv50k-2016-423909 6 62 10100100000110101110110101101110111011011101111113001001010101010100101011010000000001010000000000101111101100000000301101013
JHI-Hv50k-2016-423941 6 62 10100100000110101110110101101110111011011101111113001001010101010100101011010000000001110000000000101111101100000000301101013
JHI-Hv50k-2016-423970 6 62 10100100000110301110110101101110111011011101111111001001010101010100101011010000000001010000000010101111101100000000301101013
JHI-Hv50k-2016-424040 6 62 10100100000110301110110101101110111011011101111111001001010101010100101011010000000001010000000010101111101100000000300101011
JHI-Hv50k-2016-424195 6 62 10100100000110301110110101101110111011011101111111001001010100010100101011010000000001010000000010101111101100000000300101013
JHI-Hv50k-2016-424200 6 63 10100101000110301110110101101110111011011101111111001011010100010100101011010000000001010000000010101111101100000000300101013
SCRI_RS_204188 6 63 10100101000110301110110101101110111011011101111111001011010100010100101011010000000001010000000010101101101100000000300101013
JHI-Hv50k-2016-424445 6 63 10100101000110301110110101101110111011011101110111001011010100010100101011010000000001010000000010101101101100000000300101013
JHI-Hv50k-2016-425821 6 64 10100101000110301110110101101110111011011101110111001011010100010100101011010000000001010000010010101101101100000000000100013
JHI-Hv50k-2016-425908 6 64 10100101000110301110110101101110111010011101110111001011010100010100101011010000000001010000030010101101101100000000000100013
JHI-Hv50k-2016-426454 6 65 10000101000110301110110101101110111010011001110111001011010000010100101011010000000001010000030010101101101100000000000100013
JHI-Hv50k-2016-426124 6 64 10000101000110301110110101101110111010011101110111001011010100010100101011010000000001010000030010101101101100000000000100013
JHI-Hv50k-2016-426676 6 65 10000101000110301110110101101110111010011001110111001011010000010100101011010000000001010000030010101100101100000000000100011
JHI-Hv50k-2016-426615 6 65 10000100000110301110110101101110111010011001110111001011010000010100101011010000000001010000030010101100101100000000000100011
JHI-Hv50k-2016-426692 6 66 10000100000110001110110101100110111010011001110111101011010000010100101010010000000001010000030010101100101100000000000100011
SCRI_RS_102455 6 67 10000100000110001100110101100110111010311001110111101011010000310100101010010000000001010000010010101100101101000000000101011
SCRI_RS_162678 6 68 10000100000110001100111101100110111010311001110111101011010100310100101010010000000001010000010010101100101101000000000101011
JHI-Hv50k-2016-427840 6 68 10000100000110001100111101100110111010311011110111101011010100310100101010010000000001010000010010101100101101000000000101011
JHI-Hv50k-2016-428157 6 68 10000100000110001100111101110110111010311011110111101011010100310100101010010000000001010000010010101100101101000000000101011
JHI-Hv50k-2016-428780 6 68 10000100000110001100111101110110111010011011110111101011010100010100101010010000000000010000010010101100101101000000000101011
SCRI_RS_204644 6 69 10000100000110001100111101110110111010001011110111101011010000010100101010010000000000010000011010101100101101000000000101011
JHI-Hv50k-2016-429246 6 70 10000100000110000100111101110110111010001011110111101011010000010100101010010000000000010000011010101100101101000001000100011
SCRI_RS_235672 6 70 10000100000110000100111101110110111010001011110111101001010000010100101010010000000000010000011010101100101101000001000100011
JHI-Hv50k-2016-429858 6 70 10000100000110000100111101110110111010001011110111100001010000010100101010010000000000010000011010101100101101000001000100011
SCRI_RS_174459 6 70 10000100000110000100111101110110111010001011110111100001010000011100101010010000000000010000011010101100101101000001000100011
JHI-Hv50k-2016-430227 6 71 00000100000110000100111101110110111010001011010111100001010000011100101010010000000000010000011010101100101101000001000100011
JHI-Hv50k-2016-430383 6 71 00000100000110000100111101110111111010001011010111100001010000011100101010010000000000010000011010101100101101000001000100011
SCRI_RS_17542 6 71 00000100001110000100111101110111111010001011010111100001010000011100101010010000000000010000011010101100101101000001000100011
JHI-Hv50k-2016-433271 6 72 00000100001110000100111101110111111010001011010111100001010000011100100010010000000000010000011010101100101101000001000000011
JHI-Hv50k-2016-433456 6 72 00000100001110000100111101110111111010001011010111100001010000011100100010010000000000010000010010101100101101000001000000011
JHI-Hv50k-2016-435062 7 0 10110110110101001000100100001110001111111110111000101001111010001010000001101110100001110101110000110011100101310001100110110
JHI-Hv50k-2016-437675 7 0 10110110110101001000100100001110001111111110111000111001111010001010000001101110100001110101110000110011100101310001100110110
JHI-Hv50k-2016-440727 7 1 10110110110101001000100100001110001111111110111000111001111010001010010001101110100001110101110000110011100101110001100110100
JHI-Hv50k-2016-443311 7 1 10110110310101001000000100001110001111111110111000131001111010001010030001101110100001110101110000110011100101310001100110100
JHI-Hv50k-2016-445623 7 2 10110110110101001000000101001111001111111110111000131001111010001010030001101110100001110101110000110011300101110001100110100
JHI-Hv50k-2016-446917 7 2 10110110110101001000000101001111001011111110111000131001111010001010030001101110100001110101110000110011300101110001100110100
JHI-Hv50k-2016-447125 7 2 10110110110101001000000101001111001011111110111000111001111010001010030001101110100001110101110000110011301101110001100110100
JHI-Hv50k-2016-447697 7 2 10110110110101001000000001001111001011111110111000111001111010001010030001101110100001110101110000110011301101110001100110100
JHI-Hv50k-2016-448573 7 3 00110110110101001000000001001111001011111110111000111001111010001010030001101110000001110101110000110011301101110001100110100
JHI-Hv50k-2016-449544 7 4 00110110110101001000000001001111001011111110111000111001111010001010030001101110000001110101110001110010301101110001100110100
BOPA1_6394-944 7 4 00110110110101001000000001001111001011111110111010111001111010001010000001101110000001110101110001110010301101110001100110100
JHI-Hv50k-2016-450348 7 4 00110110110101001000000001001111001011111110111010111031111010001010001001101110000001110101110001110010301101110001100110100
JHI-Hv50k-2016-450461 7 5 00110110110101001000000001001111001011111110111010111031111010001010001001101111000001110101110001110010301001110001100110100
JHI-Hv50k-2016-451547 7 5 00110110110101001000000001001111001011111110111010111031111010001010001001101111000001110101110001110010301000110001100110100
JHI-Hv50k-2016-451563 7 5 00110110110101001000000001001111001011111110111010111031111010001010011001101111000001110101110001110010301000110001100110100
JHI-Hv50k-2016-451629 7 5 00110110110101001000000001001111001011111110111010111031101010001010011001101111000001110101110001110010301000110001100110100
JHI-Hv50k-2016-451659 7 5 00110110110101001000000001001111001011111110111010111031100010001010011001101111000001110101110001110010301000110001100110100
JHI-Hv50k-2016-451706 7 5 00110110110101001000000001001111001011111110111010111031100010000010011001101311000001110101110001110010301000110001100110100
JHI-Hv50k-2016-452400 7 6 00110110110101001000000001001111001011111110111010111031100010010010011001101310000001110101110001110010301000110001100110100
JHI-Hv50k-2016-452666 7 7 00110110111101001000000001101111001011111110111010111031100010010010011001101310000001110101100001110010301000110001100110100
SCRI_RS_197190 7 7 00110110111101001000000001101111001011111110111010111031100010010010011001101310000001110101100101110010001000110001100110100
JHI-Hv50k-2016-452734 7 7 00110110111101001000000001101111001011111110111010111031100010010010111001101310000001110101100101110010001000110001100110100
JHI-Hv50k-2016-452740 7 7 00110110111101001000000011101111001011111110111010111031100010010010111001101310000001110101100101110010001000110001100110100
JHI-Hv50k-2016-452806 7 8 01110110111301001000000011101111001011111110111111111031100010010010111001101310000001110101100101110010001000110001100110100
JHI-Hv50k-2016-452820 7 8 01110110111301001000000011101111001011111110111111111031100010010010111001101310000001110101100101110010001000010001100110100
JHI-Hv50k-2016-452839 7 8 01110110111301001000000011101111001011011110111111111031100010010010111001101310000001110101100101110010001000010001100110100
JHI-Hv50k-2016-452912 7 8 01110110111301001000000011101111001011011110111111111031100010010010111001101310000001110101100101110010001000010001100100100
JHI-Hv50k-2016-453011 7 8 01110110111301001000000011101111001011011110110111111031100010010010111001101310000001110101100101110010001000010001100100100
SCRI_RS_223021 7 9 01110110111301001000000011101111001011011110110111111131100011010010111001101110003001110101103101110010001000010001100100100
JHI-Hv50k-2016-453618 7 11 01100110111301001001000011101111001011011110110111111131100011010010111011101110000001110100100101110010001000010001000100100
JHI-Hv50k-2016-453875 7 11 01100110111301001001000011101111011011011110110111111131100011010010111011101110000001110100100101110010001000010001000100100
JHI-Hv50k-2016-454168 7 11 01100110111301001001000011101111011011011110110111111131100011010010111011101110100001110100100101110010001000010001000100100
JHI-Hv50k-2016-454406 7 11 11100110111301001001000011101111011011011110110111111131100011010010111011101110100001110100100101110010001000010001000100100
JHI-Hv50k-2016-454991 7 11 11100110111301001011000011101111011011011110110111111131100011010010111011101110100001110100100101110010001000010001000100100
JHI-Hv50k-2016-455092 7 14 11100110111301001011100011101111011011011110110111111131100111010010111011111111103001110100100101110010001010000001000100100
JHI-Hv50k-2016-455798 7 14 11100110111001001011100011101111011011011110110111111131100111010010111011111111103001110100101101110010001010000001000100100
JHI-Hv50k-2016-455890 7 14 11100110111301001011100011101111011001011110110111111131100111010010111011111111103001110100101101110010001010000001000100100
JHI-Hv50k-2016-455948 7 14 11100110111301001011100011101111011001011110110111111131100111010010111011111111103001110000101101110010001010000001000100100
JHI-Hv50k-2016-456434 7 15 11100110111301001011100011101111111001011110110111111111100111010010111011111111103001110000111101110010001010000001000100100
SCRI_RS_214533 7 17 11100110010301001011100011101111111001011110110111110111100111010010111011111111103001100000111101110010001010000001000100100
JHI-Hv50k-2016-457708 7 17 11100110010301001011100011101111111001010110110111110111100111010010111011111111103001100000111101110010001010000001000100100
SCRI_RS_150517 7 17 11100110010301001011110011101111111001010110110111110111100111010010111011111111103001100000111101110010001010000001000100100
BOPA1_2124-984 7 17 11100110010301101011110011101111111001010110110111110111100111010010111011111111103001100000111101110010001010000001000100100
SCRI_RS_209500 7 17 11100110010301101011110011101111111001010110110111110111100111010010111011111111103001100000111101110110001010000001000100100
JHI-Hv50k-2016-459243 7 17 11100110010301101011110011101111111001010110110111110111100111010010111011111111103001100000111101110110101010000001000100100
BOPA2_12_20803 7 18 11100110010301101011110011101111111001010110110111110111100111011010111011111111103001100000111101110110101010000001000100101
JHI-Hv50k-2016-459618 7 18 11100110010301101011110011101111111001010110110111110111101111011010111011111111103001100000111101110110101010000001000100101
BOPA2_12_30893 7 19 11100110010301101011110011101111111001011110110111110111101011011010111011111111103001100000111101110110101010000001000100101
BOPA2_12_10218 7 20 11100110010300101011110011101111111001011110110111110111101011011010111011111111103001100000111101110110100010000001000100101
JHI-Hv50k-2016-460146 7 20 11100110010300101011110011101111111001011110110111110111101011011010111011111111103001100001111101110110100010000001000100101
JHI-Hv50k-2016-460677 7 22 11100110010300101010110011101011111101011110110111110111101011111010111011111111103001100001111101110110100010000001000100111
JHI-Hv50k-2016-460794 7 22 11101110010300101010110011101011111101011110110111110111101011111010111011111111103001100001111101110110100010000001000100111
JHI-Hv50k-2016-461069 7 22 11101110010000101010110011101011111100011110110111110111101011111010111011111111100001100001111101110110100010000001000100111
BOPA1_398-1244 7 22 11101110010000001010110011101011111100011110110111110111101011111010111011111111103001100001111101110110100010000001000100111
JHI-Hv50k-2016-461181 7 22 11101110010000001010110011101011111101011110110111110111101011111010111011111111103001100001111101110110100010000001000100111
BOPA2_12_30143 7 23 11101110010000001011110011101011113101011110110111010111101011111010111011111111103001100001111101110110100010000001000100111
BOPA1_ConsensusGBS0356-1 7 23 11101110010000001011110011101011113101011110110111010111101010111010111011111111103001100001111101110110100010000001000100111
JHI-Hv50k-2016-461918 7 23 11001110110000001011110011101011113101011110110111010111101010111010111011111111103001100001111101110110100010000001000100111
JHI-Hv50k-2016-461928 7 23 11001110010000001011110011101011113101011110110111010111101010111010111011111111103001100001111101110110100010000001000100111
SCRI_RS_155795 7 23 11001110110000001011110011101011113101011110110111010111101010111010111011111111103001100001111101110110110010000001000100111
JHI-Hv50k-2016-462179 7 23 11001110110000000011110011101011113101011110110111010111101010111010111011111111103001100001111101110110110010000001000100111
SCRI_RS_202061 7 25 11011110110000000011110011101011113101011111110111010111101010111010111011111111103001101001111101111110110010000001000100111
JHI-Hv50k-2016-462760 7 26 11010110110000000011110011101011113101011111010111010111101010111010111011113111103001101001111101111110110010000001000100111
JHI-Hv50k-2016-463001 7 27 11010110110000000011110011101011113101011111010111010111101010111011111011113111103001101011111101111110110030000001000100111
JHI-Hv50k-2016-463268 7 27 11010110110000000011110011101011113101011111010111010111101010111011111011013111103001101011111101111110110030000001000100111
JHI-Hv50k-2016-463401 7 28 11010110110000000111110011101011113101011111010111010111101010111011111001013111103001101011111101111110110030000001000100111
JHI-Hv50k-2016-463438 7 28 11010110110000000111110011101011113101011011010111010111101010111011111001013111103001101011111101111110110030000001000100111
JHI-Hv50k-2016-463595 7 28 11010110110000000111110111101011113101011011010111010111101010111011111001013111103001101011111101111110110030000001000100111
JHI-Hv50k-2016-463775 7 28 11010110110000000111110111101011113101011011010111010111101010111011111001013111103001101011111101111111110030000001000100111
SCRI_RS_169904 7 28 11010110110000000111110111101011113101011011010111010111101010111011111001013011100001101011111101111111110010000001000100111
JHI-Hv50k-2016-464589 7 28 11010110110010000111110111101011113101013011010111010111101010111011111001013011100001101011111101111111110010000001000100111
SCRI_RS_212956 7 28 11010110110010000111110111101011113101013011010111011111101010111011111001013011100001101011111101111111110010000001000100111
JHI-Hv50k-2016-465225 7 29 11010110110010000111110111101011113001013011010111011111101010111011111001013011000001101011111101111111110010000001000100111
JHI-Hv50k-2016-465287 7 29 11010110110010000111110111101011113001013011010111011111101010111011111001013011000001101111111101111111110010000001000100111
SCRI_RS_7115 7 29 11010110110010000111110111101011113001013011010111011111101010111011111001013111000001101111111101111111110010000001000100111
JHI-Hv50k-2016-466574 7 29 11010110110010000111110111101011113001013011010111011111101010111011111001013111000001101111111101111111111010000001000100111
SCRI_RS_196063 7 29 11010110110010000111110111101011113001013011010111001111101010111011111001013111000001101111111101111111111010000001000100111
SCRI_RS_137626 7 29 11010110110010000111110111101011113001013011010111001111101010111011111001013111000001101111111101111111111010000001010100111
SCRI_RS_161111 7 29 11010110110010000111110111101011113001013011000111001111101010111011111001013111000001101111111101111111111010000001010100111
SCRI_RS_230478 7 32 11010110110010010111111111101011110001011011000111001110101110111011111101013011000001301111111101111011111010000001010100111
BOPA1_2669-1012 7 32 11110110110010010111111111101011110001011011000111001110101110111011111101013011000001301111111101111011111010000001010100111
JHI-Hv50k-2016-468175 7 32 11110110110010010111111111101011110001011011000111001110101110111011111101013011000001301111111101111011111010000001010100101
JHI-Hv50k-2016-468204 7 33 11110110110010010111111111101011110001011010000111031110100110111011111101013011000001301111111101111011111010000001010100101
JHI-Hv50k-2016-468461 7 33 11110110110010010111111111101011110001011010000111031110100110111011111101013011000001301111111101111011111010000001010100111
JHI-Hv50k-2016-468513 7 33 11110110110010010111111111101011110001011010000111031110100110111011111111013011000001301111111101111011111010000001010100111
SCRI_RS_15864 7 33 11110110110010010111111111101011110001011010000111031110100110111011111111013011000001301111111101111011111010000001010000111
JHI-Hv50k-2016-469166 7 33 11110110110010010111111111101011110001011010000111031110100110101011111111013011000001301111111101111011111010000001010000111
JHI-Hv50k-2016-469196 7 34 11110110110010010111111111101011110001011010000111031110100110101011111111013011000001301111111000111011111010000001010010111
JHI-Hv50k-2016-469380 7 35 11110110110010010111111111101111110001010010000111031110100110101011111111013011000001301111111000111011111010000001010010111
JHI-Hv50k-2016-470939 7 35 11110110110010010111111111101111110001010010000111031110100110101011111111013011000003301111111000113011111010000001010010011
JHI-Hv50k-2016-471007 7 36 11110110110010010111111111101111110001010010000111031110100110101011111101013011001003301111111000113011111010000001010010011
JHI-Hv50k-2016-473073 7 37 11110110110010010111111111101101100001010010000111031110100110101011111101013011001003001111111000113011111010000001010010011
JHI-Hv50k-2016-473386 7 38 11110110110010010111111111101101100001010010000111031110100110101011111101011011001000001111111000103011111010000001010110011
SCRI_RS_154193 7 38 11110110110010010111111111101101100001010010000111031110100110101011111101010011001000001111111000103011111010000001010110011
JHI-Hv50k-2016-473593 7 38 11110110110010010111011111101101100001010010000111031110100110101011111101010011001000001111111000103011111010000001010110011
BOPA2_12_30496 7 38 11110110110010010111011111101101100001010010000111031110100110101011111101010011001000001111111000103011110010000001010110011
SCRI_RS_165918 7 38 11110110110010010111011111101101100001010010000111031110100110101011111101010011001000001111111000103111110010000001010110011
SCRI_RS_158234 7 38 11110110110011010111011111101101100001010010000111031110100110101011111101010011001000001111111000103111110010000001010110011
SCRI_RS_235641 7 38 11110110110011010111011111101101101001010010000111031110100110101011111101010011001000001111111000103111110010000001010110011
JHI-Hv50k-2016-475630 7 38 11110110110011010111011111101101101001010010000111031110100110101011111101010011001000001111111000003111110010000001010110011
BOPA2_12_11254 7 38 11110110110011010111011111101101101001010010000111031110100110101011111101010011001000011111111000003111110010000001010110011
JHI-Hv50k-2016-475706 7 39 11110110110011010111011111101101101001010010000111111110100010101011111101010011001000011111111000003111110010000001010111011
BOPA1_5138-265 7 39 11110110110011010111011111101101101001010010000111111110100011101011111101010011001000011111111000003111110010000001010111011
JHI-Hv50k-2016-479756 7 39 11110110110011010111011111101101101001010010000110111110100011101011111101010011001000011111111000000111110010000001010111011
SCRI_RS_235584 7 40 11110110110011010111011111101101101001010010000110111110100011101011111111010011001000011111111000003111111010000000010111011
SCRI_RS_175164 7 40 11110110110011010111011111101101101001010011000110111110100011101011111111010011001000031111111000003111111010000000010111011
BOPA2_12_31513 7 40 11110110110011010101011111101101101001010011000110111110100011101011111111010011001000031111111000003111111010000000010111011
SCRI_RS_2914 7 40 11110110110011010101011111101101101001010011000111111110100011101011111111010011001000011111111000003111111010000000010111011
SCRI_RS_219581 7 41 11110110110011010101011111101101001001010011000111111110100011101011111111010011001000111111111000003111111010000000010111011
SCRI_RS_194291 7 42 11110110110011010101001111101101001001010011000111111110100011101011111111010011001010111111111000003111111010000000010111011
JHI-Hv50k-2016-491428 7 43 11110110110011010101011111101101001001010011000111111110100011101111111111010011001030111111111000003111111010000000010111011
SCRI_RS_104566 7 43 11110110110011010101011111101101001001010010000111111110100011101111111111010011001030111111111000003111111010000000010111011
JHI-Hv50k-2016-491516 7 43 11110110110011010101011111101101001101010010000111111110100011101111111111010011001030111111111000003111111010000000010111011
SCRI_RS_194841 7 45 11110110110011010111011111101101001101000010000111111110100011101111111111010011001000111111111000003111111010000000000110011
SCRI_RS_4562 7 46 11110110110011010111011111101101001101000010000111111110100011101111111111010011001000111110111000003111111110010000000110011
JHI-Hv50k-2016-491626 7 46 11110110110011010111011111101101001101000010000111111110100011101111111111010011001000111010111000003111111110010000000110011
JHI-Hv50k-2016-491699 7 46 11110110110011010111011111101101001101000010000111111110100011101111111111010011001000111010101000003111111110010000000110011
SCRI_RS_112863 7 46 11110110110011010111011111101101001101000010000111111110100011101111111111010011001000111010101000003011111110010000000110011
BOPA2_12_21479 7 46 11110110110011010111011111101101001101000010000111111110100011101111111111010011001010111010101000003011111110010000000110011
JHI-Hv50k-2016-492638 7 49 11110110110011010011011111101101001101010010000111111110100001101101111111010011001010111110101000003011111110000000000110111
JHI-Hv50k-2016-492692 7 49 11110110110011010011011111101101001101010010000111111110100001101101111111011011001010111110101000003011111110000000000110111
JHI-Hv50k-2016-493017 7 50 11110110110011010011011111101101001101010010000111111010100000101101111111011011001010111110101030003011111110000000000110111
BOPA2_12_20611 7 50 11110110110011010011011111101101001101010010000111111010100000101101111111011011001010111110101030003011110110000000000110111
SCRI_RS_4556 7 50 11110110110011010011011111101101001101010010000111111010100000101101111111011011001010111110101030003111110110000000000110111
JHI-Hv50k-2016-493889 7 50 01110110110011010011011111101101001101010010000111111010100000101101111111011011001010111110101030003111110110000000000110111
JHI-Hv50k-2016-493907 7 50 01110110110011010011011111101101001101010010000111110010100000101101111111011011001010111110101030003111110110000000000110111
JHI-Hv50k-2016-493972 7 50 01110110110011010011011111101101001101010010000111110010100000101101111011011011001010111110101000003111110110000000000110111
BOPA2_12_21464 7 50 01110110110011010011011111101101001100010010000111110010100000101101111311011011001010111110101000003111110110000000000110111
SCRI_RS_136586 7 51 01110110110011010011011110101101001100010010000111110010100000101101111011011011001010111100101000003111110110000000000110111
JHI-Hv50k-2016-494113 7 51 01110110110011010001011110101101001100010010000111110010100000101101111011011011001010111100101000003111110110000000000110111
JHI-Hv50k-2016-494246 7 51 01110110110011010001011110101101001100010010000101110010100000101101111011011011001010111100101000003111110110000000000110111
SCRI_RS_7974 7 51 01110110110011010001011110101101000100010010000101110010100000101101111011011011001010311100101000003111110110000000000110111
SCRI_RS_141732 7 51 01110110110011010001011110101101000100010010000101110010100000101101111011011011001010311100101000003111100110000000000110111
JHI-Hv50k-2016-495236 7 51 01110110110011010001011110101101000100010010000103110000100000101101111011011011001010311100101000003111100110000000000110111
JHI-Hv50k-2016-495986 7 51 01110110110011010001011110101101000100010010000103110000100000101101111011011011001010111100100000003111100110000000000110111
JHI-Hv50k-2016-497019 7 51 01110110110011010001011110100101000100010310000103110000100000101101111011011011001010111100100000003111100110000000000110111
BOPA1_1178-279 7 51 01110110100011010001011110100101000100010310000103110000100000101101111011011011001010111100100000003111100110000000000110111
JHI-Hv50k-2016-498048 7 54 01110110000011010001011110100001000000010110000100110000100000101100111011011011001010101101100000003011100110010000000110111
JHI-Hv50k-2016-498211 7 56 01110110000011010001011110100001000000010110000100110000100000101100111001011011001010101101100100003010100110010000000110101
JHI-Hv50k-2016-498830 7 56 01110110000011010001011110100001000000010110000100110000100000101100111001011011001010101101100100000010100110010001000110101
JHI-Hv50k-2016-499019 7 56 01110110000011010001011110100001000000010110000100111000100000101100111001011011001010101101100100000010100110010001000110101
BOPA1_1789-782 7 57 01110110000011010000011110100001000000011110000100111000100000101100111001011011001010101101100100000010100110010001010110101
SCRI_RS_174255 7 57 01110110000011010000011110100000000000011110000100111000100000101100111001011011001010101101300100000010100110010001010110101
SCRI_RS_160611 7 57 01110110000011010000011110100000000000011110000100111000100000101100111001011011001010100101300100000010100110010001010110101
SCRI_RS_144462 7 57 01110110000011010000011110100000000000011110000100111000000000101100111001011011001010100101300100000010100110010001010110101
JHI-Hv50k-2016-500791 7 57 01110110000011010000011110100000000000011110000100111000000000101100111001011011001010100101310100000010100110010001010110101
JHI-Hv50k-2016-501080 7 59 01110110000011010000011110100001000000011110000100111000000000101100111011011011001010100101311110000010100110010001010110101
JHI-Hv50k-2016-501105 7 58 01110110000011010000011110100000000000011110000100111000000000101100111011011011001010100101311100000010100110010001010110101
SCRI_RS_138715 7 60 01110110000011010000010110100001000000011110000100101000000000101100111011011011001010100101311110000010100110010001010110101
JHI-Hv50k-2016-501900 7 60 01110110000011010000010110100001000000011110000100101000000000001100111011011011001010100101311110000010100110010001010110101
JHI-Hv50k-2016-501970 7 60 01110110000011010000010110100001000010011110000100101000000000001100111011011011001010100101311110000010100110010001010110101
JHI-Hv50k-2016-502090 7 61 01110110000011010000010110010001000010001110000100101000000000001100111011011011001010100101311110000010100110010001010110101
JHI-Hv50k-2016-502956 7 61 01100110000011010000010110010001000010001110000100101000000000001100111011011011001010100101311110000010100110010001010110101
JHI-Hv50k-2016-502996 7 61 01100110000011010000010110010001000010001110000000101000000000001100111011011011001010100101311110000010100110010001010110101
JHI-Hv50k-2016-503418 7 61 01100110000011010000010110010001000010001110000000101000000000001100011011011011001010100101311110000010100110010001010110101
BOPA1_5796-1189 7 61 01100110000011010000010110010001000010001110000000101000000000001100011011011011001010100101311110000000100110010001010110101
JHI-Hv50k-2016-503524 7 61 01100110000011010000010110010001000010001110000000101000000000001100011011011011001011100101311130000000100110010001010110101
SCRI_RS_206189 7 61 01100110000001010000010110010001000010001110000000101000000000001100011011011011001011100101311130000000100110010001010110101
JHI-Hv50k-2016-504650 7 62 01100110000001010000010110010001000010001111000100101000000000001100011011011011001011100101311130000000100110010001010110101
JHI-Hv50k-2016-504766 7 63 01100110000001010000010110010001000010011111000100101000001000001100011011011011001011100101311130000000100110010001010110101
SCRI_RS_196730 7 63 01100110000001010000010110010001000010011111000100101000001000001100011011011011001011100101311130000000100110010101010110101
JHI-Hv50k-2016-505556 7 64 01100110000001010000010110010001001010011111000100101000001000001100011011011010001011100101011100000000100110010101010110101
JHI-Hv50k-2016-505671 7 64 01100110000001010000010110010001001011011111000100101000001000001100011011011010001011100101311130000000100110010101010110101
SCRI_RS_1383 7 64 01100110000001010000010110010001001011011111000100101000001000001100011011011010001011130101311130000000100110010100010110101
SCRI_RS_151523 7 64 01100110000001010000010110010001001011011111000100101000001000001100011011011010001011110101311110000000100110010100010110100
[truncated: 30 more rows]

## Sheet: TableS7 PI39 x PI67 Markers
Supplementary Table S7: List of markers and genotype calls in the barley RIL population PI 392501 × PI 67381
[truncated: 1,289 more rows]
[truncated: 68 more columns]

[truncated: 11 more sheets: TableS8 PI39xPI67 Mapping data, TableS9 Hock x PI67 Averages, TableS10 TR326 x PI67 Averages, TableS11 PI39xPI67 Averages, TableS12 Hock x PI67 R2&LOD , TableS13 TR326 x PI67 R2-LOD, TableS14 PI39xPI67 R2-LOD, TableS15 Ho x PI67 GenCat 2H-7H, TableS16 TR326xPI67 GenCat2H-7H, TableS17 TR326xPI67 GenCat2H-4H, Sheet1]
